# Supplementary material for: Vaccination of SARS-CoV-2-infected individuals expands a broad range of clonally diverse affinity-matured B cell lineages
Source: Research Square preprint supplement (doi:10.21203/rs.3.rs-2231608/v1), 2022-11-11
Supplement: Supplementary file 1 [file 196e5be39a3b37f91cc7e113.xlsx]

## Sheet: Sheet1
	Donor	timepoint	sequence_id	HC v_call	HC d_call	HC j_call	LC v_call	LC j_call	HC V_SHM	LC V_SHM	Subdomain specificity	HKU1 S binder	MLV SARS2 WT IC50(ug/ml)	VSV SARS2 WT IC50(ug/ml)	VSV SARS2 Beta IC50(ug/ml)	VSV SARS2 Delta IC50(ug/ml)	MLV SARS2 Omicron IC50(ug/ml)	cdr3	cdr3_aa	LC cdr3	LC cdr3_aa	sequence	LC sequence
0	IML3694	Acute	ADI-66209	IGHV2-70*01	IGHD1-26*01	IGHJ4*02	IGKV3-20*01	IGKJ5*01	4.7	5.2	NTD	No						GCACGGATAAGTGGGAGCGACTTCCACTTTGACCAG	ARISGSDFHFDQ	CAGCAATATAGTAGCTCACCTCCGATCACC	QQYSSSPPIT	CAGGTCACCTTGAGGGAGTCTGGTCCTGCGCTGGTGAAACCCACACAGACCCTCACACTGACCTGCACCTTCTCTGGGTTCTCACTCAACACTAGTGGAATGTGTCTGACCTGGATCCGCCAGCCCCCAGGGAAGCCCCTGGAGTGGCTTGCACTCATTGATTGGGATGACGATAAGTACTACAGTACGTCTCTGAAGACCAGGCTCACCATCTCCAAGGACACCTCCAAAGACCAGGTGGTCCTTACAATGACCAACATGGACCCTGTCGACAGCGCCACGTATTATTGTGCACGGATAAGTGGGAGCGACTTCCACTTTGACCAGTGGGGCCAAGGAACCCTGGTCACCGTCTCCTCA	GAAATTGTGTTGACGCAGTCTCCAGGCACCCTGTCTTTGTCTCCAGGGGAAAGAGCCACCCTCTCCTGCAGGGCCAGTCAGAGTGTTAACAACAAATACTTAGCCTGGTACCAGCAGAAACCTGGCCAGACTCCCAGGCTCCTCATCTATGCTGCATCCAACAGGGCCACTGGCATCCCAGACAGGTTCAGTGGCAGTGGGTCTCAGACAGACTTCACTCTCACCATCAACAGACTGGAACCTGAAGATTTTGCGGTGTATTTCTGTCAGCAATATAGTAGCTCACCTCCGATCACCTTCGGCCAAGGGACACGACTGGAGATTAAA
1	IML3694	Acute	ADI-66210	IGHV3-30-3*01	IGHD3-3*01	IGHJ6*03	IGKV3-20*01	IGKJ1*01	3.4	4.1	Undefined	No						GCGAGAGATTGGAGATATTACGATTTTTGGAGTGGTTATTTGTCAGACGCACTGAAGGACCACTACTACTATATGGACGTC	ARDWRYYDFWSGYLSDALKDHYYYMDV	CAGCAGTATGTTGGCTCACCTCCGTACACT	QQYVGSPPYT	CAGGTGCAGCTGGTGGAGTCTGGGGGAGGCGTGGTCCAGCCTGGGAGGTCCCTGAGACTCTCCTGTGCAGCCTCTGGATTCACCTTCAGTAACTTTGCTATGCACTGGGTCCGCCTGGCTCCAGGCAAGGGGCTGGAGTGGGTGTCAGTTATATCCTATGATGGAAGCAGTAAATACTACGCAGACTCCGTGAAGGGCCGATTCACCATCTCCAGAGACAGTTCCACGAACACGCTTTATCTGCAAATGGACAGCCTGAGAGCTGAGGACACGGCTGTGTATTACTGTGCGAGAGATTGGAGATATTACGATTTTTGGAGTGGTTATTTGTCAGACGCACTGAAGGACCACTACTACTATATGGACGTCTGGGGCAAAGGGACCACGGTCACCGTCTCC…	GAAATTGTGTTGACGCAGTCTCCAGGCACCCTGTCTTTGTCTCCAGGGGAAAGAGCCACCCTCTCCTGCAGGGCCAGTCAGAATGTTATCAACTACTTAGCCTGGTACCAGCACAAACCTGACCAGCCTCCCAGGCTCCTCATCTTTGGTGCATCCAGCAGGGCCACTGGCATCCCAGACAGGTTCAGTGGCAGTGGGTCTGGGACAGACTTCACTCTCACCATCAGCAGACTGGAGCCTGAAGATTTTGCAGTGTATTACTGTCAGCAGTATGTTGGCTCACCTCCGTACACTTTCGGCCAAGGGACCAAGGTGGAAATCAAA
2	IML3694	Acute	ADI-66208	IGHV1-18*01	IGHD1-26*01	IGHJ6*03	IGKV3-20*01	IGKJ1*01	0	0	NTD	No						GCGAGAGTTATTTTTCCGTTTGTGCGGGATCCGTGGGAGCTACTTAGCGGGGTGTCTGGCGGGGATAACTACTACTACTACTACATGGACGTC	ARVIFPFVRDPWELLSGVSGGDNYYYYYMDV	CAGCAGTATGGTAGCTCACCTCCGTACACT	QQYGSSPPYT	CAGGTTCAGCTGGTGCAGTCTGGAGCTGAGGTGAAGAAGCCTGGGGCCTCAGTGAAGGTCTCCTGCAAGGCTTCTGGTTACACCTTTACCAGCTATGGTATCAGCTGGGTGCGACAGGCCCCTGGACAAGGGCTTGAGTGGATGGGATGGATCAGCGCTTACAATGGTAACACAAACTATGCACAGAAGCTCCAGGGCAGAGTCACCATGACCACAGACACATCCACGAGCACAGCCTACATGGAGCTGAGGAGCCTGAGATCTGACGACACGGCCGTGTATTACTGTGCGAGAGTTATTTTTCCGTTTGTGCGGGATCCGTGGGAGCTACTTAGCGGGGTGTCTGGCGGGGATAACTACTACTACTACTACATGGACGTCTGGGGCAAAGGGACCACG…	GAAATTGTGTTGACGCAGTCTCCAGGCACCCTGTCTTTGTCTCCAGGGGAAAGAGCCACCCTCTCCTGCAGGGCCAGTCAGAGTGTTAGCAGCAGCTACTTAGCCTGGTACCAGCAGAAACCTGGCCAGGCTCCCAGGCTCCTCATCTATGGTGCATCCAGCAGGGCCACTGGCATCCCAGACAGGTTCAGTGGCAGTGGGTCTGGGACAGACTTCACTCTCACCATCAGCAGACTGGAGCCTGAAGATTTTGCAGTGTATTACTGTCAGCAGTATGGTAGCTCACCTCCGTACACTTTCGGCCAAGGGACCAAGGTGGAAATCAAA
3	IML3694	Acute	ADI-66214	IGHV3-33*01	IGHD3-16*02	IGHJ4*02	IGKV1-39*01	IGKJ1*01	6.4	12.5	NTD	No						GCGAGAGAGACGGGGGACGTGTCGATAGCGCCGCACCTTGACTAC	ARETGDVSIAPHLDY	CAACAGAGTTACAGTATGCTTCCGGCG	QQSYSMLPA	CAGGTGCAGCTGGTGGAGTCTGGGGGAGGCGTGGTGCAGCCTGGGAGGTCCCTGAGACTCTCCTGTGCTGCGTCTGGATTCACCTTCAGTAAATATGGCATGCACTGGGTCCGCCAGGCTCCAGGCAAGGGGCTGGAGTGGGTGGCACTTATATGGTATGATGGAAGTAATATATTCTATGCAGAGTCCGTGAAGGGCCGATTCACCCTCTCCAGAGACAATTCCAAGAACACACTATCTCTACTTATGAACAACCTGGGAGCCGACGACACGGCTGTCTATTACTGTGCGAGAGAGACGGGGGACGTGTCGATAGCGCCGCACCTTGACTACTGGGGCCAAGGAACCCTGGTCACCGTCTCCTCA	GACATCCAGATGACCCAGTCTCCATCCTCCCTGTCTGCATCTGTCGGAGACAGAGTCACCATCACTTGCCGGGCTAGTCAGTTCATTGCTAACTTTGTGAGTTGGTATCAGCAGAAACCAGGCAGAGCCCCTCAAGTCCTCATCTATAGTGCATCCACTCTGCAAAGTGGGGTCCCATCTAGGTTCAATGGCACTGGGTCTGGGACAGATTTCACTCTCACCATCACCAATTTGCAACGTGACGATTTTGGAACTTACCACTGTCAACAGAGTTACAGTATGCTTCCGGCGTTCGGCCAAGGGACCAAGGTGGAAATCAAA
4	IML3694	Acute	ADI-66203	IGHV3-9*01	IGHD6-13*01	IGHJ4*02	IGLV2-14*01	IGLJ2*01	4.4	3	NTD	No						GCAAAGGGTGATAGCAGCAGCTGGTACTTTAATAGTTTTGACTTC	AKGDSSSWYFNSFDF	AGCTCATATACAACTAGCGGCACTCTTGTACTA	SSYTTSGTLVL	GAAGTGCAGCTGGTGGAGTCTGGGGGAGACTTGGTACAGCCTGGCAGGTCCCTGAGAGTCTCCTGTGCAGCCTCTGGATTCAGTTTTGATGATTATGGCATGCACTGGGTCCGGCAAGCTCCAGGGAAGGGCCTGGAGTGGGTCTCAGGTATTAGTTGGAATAGTGATAACATAGCCTATGCGGACTCTGTGAAGGGCCGATTCACCATCTCCAGAGACAACGCCAAGAATTCCCTGTATCTGCACATGGACAGTCTGAGAGCTGAGGACACGGCCCGGTATTACTGTGCAAAGGGTGATAGCAGCAGCTGGTACTTTAATAGTTTTGACTTCTGGGGCCAAGGAACCCTGGTCACCGTCTCCTCA	CAGTCTGCCCTGACTCAGCCTGCCTCCGTGTCTGGGTCTCCTGGACAGTCGATCACCATCTCCTGCACTGGAACCAGCAGTGACATTGGTGTTTATAACTATGTCTCCTGGTACCAACAGCACCCAGGCAAGGCCCCCAAACTCATGATTTATGATGTCAGTAATCGGCCCTCAGGGGTTTCTGATCGCTTCTCTGGCTCCAAGTCTGGCAACACGGCCTCCCTGACCATCTCTGGGCTCCAGGCTGAGGACGAGGCTGCTTATTACTGCAGCTCATATACAACTAGCGGCACTCTTGTACTATTCGGCGGAGGGACCAAGCTGACCGTCCTA
5	IML3694	Acute	ADI-66211	IGHV1-46*03	IGHD3-10*01	IGHJ6*02	IGLV3-25*03	IGLJ2*01	0	0	Undefined	No						GCTAGAGATCCCAGCGTGGTTCCATCCTTAGACTACTACTACGGTATGGACGTC	ARDPSVVPSLDYYYGMDV	CAATCAGCAGACAGCAGTGGTACTTATGTGGTA	QSADSSGTYVV	CAGGTGCAGCTGGTGCAGTCTGGGGCTGAGGTGAAGAAGCCTGGGGCCTCAGTGAAGGTTTCCTGCAAGGCATCTGGATACACCTTCACCAGCTACTATATGCACTGGGTGCGACAGGCCCCTGGACAAGGGCTTGAGTGGATGGGAATAATCAACCCTAGTGGTGGTAGCACAAGCTACGCACAGAAGTTCCAGGGCAGAGTCACCATGACCAGGGACACGTCCACGAGCACAGTCTACATGGAGCTGAGCAGCCTGAGATCTGAGGACACGGCCGTGTATTACTGTGCTAGAGATCCCAGCGTGGTTCCATCCTTAGACTACTACTACGGTATGGACGTCTGGGGGCAAGGGACCACGGTCACCGTCTCCTCA	TCCTATGAGCTGACACAGCCACCCTCGGTGTCAGTGTCCCCAGGACAGACGGCCAGGATCACCTGCTCTGGAGATGCATTGCCAAAGCAATATGCTTATTGGTACCAGCAGAAGCCAGGCCAGGCCCCTGTGCTGGTGATATATAAAGACAGTGAGAGGCCCTCAGGGATCCCTGAGCGATTCTCTGGCTCCAGCTCAGGGACAACAGTCACGTTGACCATCAGTGGAGTCCAGGCAGAAGACGAGGCTGACTATTACTGTCAATCAGCAGACAGCAGTGGTACTTATGTGGTATTCGGCGGAGGGACCAAGCTGACCGTCCTA
6	IML3694	Acute	ADI-66230	IGHV3-7*01	IGHD3-3*01	IGHJ6*02	IGKV1-39*01	IGKJ3*01	0	0	Undefined	No						GCGAGAGAGGGGCTGTATTACGATTTTTGGAGTGGTTATTATAACCCGAACATCTACTACGGTATGGACGTC	AREGLYYDFWSGYYNPNIYYGMDV	CAACAGAGTTACAGTACCTCGATATTCACT	QQSYSTSIFT	GAGGTGCAGCTGGTGGAGTCTGGGGGAGGCTTGGTCCAGCCTGGGGGGTCCCTGAGACTCTCCTGTGCAGCCTCTGGATTCACCTTTAGTAGCTATTGGATGAGCTGGGTCCGCCAGGCTCCAGGGAAGGGGCTGGAGTGGGTGGCCAACATAAAGCAAGATGGAAGTGAGAAATACTATGTGGACTCTGTGAAGGGCCGATTCACCATCTCCAGAGACAACGCCAAGAACTCACTGTATCTGCAAATGAACAGCCTGAGAGCCGAGGACACGGCTGTGTATTACTGTGCGAGAGAGGGGCTGTATTACGATTTTTGGAGTGGTTATTATAACCCGAACATCTACTACGGTATGGACGTCTGGGGGCAAGGGACCACGGTCACCGTCTCCTCA	GACATCCAGATGACCCAGTCTCCATCCTCCCTGTCTGCATCTGTAGGAGACAGAGTCACCATCACTTGCCGGGCAAGTCAGAGCATTAGCAGCTATTTAAATTGGTATCAGCAGAAACCAGGGAAAGCCCCTAAGCTCCTGATCTATGCTGCATCCAGTTTGCAAAGTGGGGTCCCATCAAGGTTCAGTGGCAGTGGATCTGGGACAGATTTCACTCTCACCATCAGCAGTCTGCAACCTGAAGATTTTGCAACTTACTACTGTCAACAGAGTTACAGTACCTCGATATTCACTTTCGGCCCTGGGACCAAAGTGGATATCAAA
7	IML3694	Acute	ADI-66213	IGHV3-33*01		IGHJ4*02	IGLV3-21*03	IGLJ1*01	4.1	3.8	NTD	No						GCGAGAACTTCGCGTCGGTTCTACATTGATTAC	ARTSRRFYIDY	CAGGTGTGGGATAGTAGTAGTGATCATTATGTC	QVWDSSSDHYV	CAGGTGCAGCTGGTGGAGTCTGGGGGAGGCGTGGTCCAGCCTGGGAGGTCCCTGAGACTCTCCTGCGCAACGTCTGGATTCACCTTCAGTAGCTCTGGCATGCACTGGGTCCGCCAGGTTCCAGGCAAGGGGCTGGAGTGGGTGGCAGTTATTTGGTATGATGGAAGTAATAAATACTATGCAGACTCCGTGAAGGGCCGATTCACCATCTCCAGAGACAATTCCAAGGACACGTTGTATCTGCAAATGAGCAGCCTGAGAGTCGAGGACACGGCTATATATTATTGTGCGAGAACTTCGCGTCGGTTCTACATTGATTACTGGGGCCAAGGAACCCTGGTCACCGTCTCCTCA	TCCTATGTGCTGACTCAGCCACCCTCGGTGTCAGTGGCCCCAGGAAAGACGGCCAACATTACCTGTGGGGGAAACGACATTGGAGGAAGTAAAGATGTACATTGGTACCAGCAGAAGCCAGGCCAGGCCCCTGTGCTGGTCGTCTATGATGATAGCGACCGGCCCTCAGGGATCCCTGAGCGATTCTCTGGCTCCAACTCTGGGAACACGGCCACCCTGACCATCACCAGGGTCGAAGCCGGGGATGAGGCCGACTATTACTGTCAGGTGTGGGATAGTAGTAGTGATCATTATGTCTTCGGAACTGGGACCAAGGTCACCGTCCTA
8	IML3694	Acute	ADI-66212	IGHV3-33*01		IGHJ4*02	IGLV3-21*03	IGLJ1*01	5.4	3.1	NTD	No						GCGAGAACTTCGCGCCGGTTCTACATTGATTAC	ARTSRRFYIDY	CAGGTGTGGGATAGCAGTACTGATCAATATGTC	QVWDSSTDQYV	CAGGTGCAGCTGGTGGAGTCTGGGGGAGGCGTGGTCCAGCCTGGGAGGTCCCTGAGACTCTCCTGTGCAACGTCTGGATTCGCCTTCCGTAGTTCTGGCATGCACTGGGTCCGCCAGGTTCCAGGCAAGGGGCTGGAGTGGGTGGCAGTTATTTGGTATGATGGAAGTAACAAATACTATGCAGACTCCGTGAAGGGCCGATTCACCGTCTCCAGAGACAACTCCAAGGACACGCTGTATCTGCAAATGAGCAGCCTGAGAGTCGAGGACACGGCTATATATTATTGTGCGAGAACTTCGCGCCGGTTCTACATTGATTACTGGGGCCAAGGAACCCTGGTCACCGTCTCCTCA	TCCTATGTGCTGACTCAGCCACCCTCGGTGTCAGTGGCCCCAGGAAAGACGGCCAGGATTACCTGTGGGGGAAACGACATTGGTGGAAGTAAAGATGTACACTGGTACCAGCAGAAGCCAGGCCAGGCCCCTGTGCTGGTCGTCTATGATGATAGCGACCGGCCCTCAGGGATCCCTGAGCGATTCTCTGGCTCCAACTCTGGGAACACGGCCACCCTGACCATCAGCAGGGTCGAAGCCGGGGATGAGGCCGACTATTACTGTCAGGTGTGGGATAGCAGTACTGATCAATATGTCTTCGGAACTGGGACCAAGGTCACCGTCCTA
9	IML3694	Acute	ADI-66201	IGHV4-59*01	IGHD2-21*01	IGHJ1*01	IGKV3-20*01	IGKJ1*01	6.8	2.8	S2	No						GCGAGAGGCTTTGTGACG	ARGFVT	CTACAGTCTGGTAGCTCGTGGACG	LQSGSSWT	CAGGTGCAGCTGCAGGAGTCGGGCCCAGGGCTGGTGAAGCCTTCGGAGACCCTGTCCCTCACCTGCATTGTCTCTAGTGGCTCCCTCAGTGGTTACTACTGGAGCTGGTTCCGGCAGTCCCCAGGGAAGGGACTGGAGTGGATTGGATATATCTATTATAGTGGGCCCACCAAATACAACCCCTCCCTCAAGAGTCGAGTCACCATGTCAGTAGACACGTCCAAGAACCAGTTCTCTCTGAAGTTGATTTCTGTGACCGCTGCGGACACGGCCATATATTATTGTGCGAGAGGCTTTGTGACGTGGGGCCAGGGCACCCTGGTCACCGTCTCCTCA	GAAATTGTGTTGACGCAGTCTCCAGGCACCCTGTCTTTGTCTCCAGGGGAAAGAGCCACCCTCTCCTGCAGGGCCAGTCAGAGTGTTAGCAGCAACTACTTAGCCTGGTTCCAGCAGAAACCTGGCCAGGCTCCCAGGCTCCTCATCTATGGTGCATCCAGCAGGGCCACTGGCATCCCCGACAGGTTCAGTGGCAGTGCGTCTGGGACAGACTTCACTCTCACCATCAGCAGACTGGAGCCTGAAGATTTTGCAGTATATTACTGTCTACAGTCTGGTAGCTCGTGGACGTTCGGCCAAGGGACCAAGGTGGAAATCAAA
10	IML3694	Acute	ADI-66202	IGHV4-61*11	IGHD5-18*01	IGHJ4*02	IGLV2-14*01	IGLJ2*01	5.4	3.4	S2	No						GCGAGAGGTGGATACAGCTCTGTTTTTGCCGGGTTAAATACTGTAGCCCCCCTTGACTCC	ARGGYSSVFAGLNTVAPLDS	AACTCATATACAGTCAGCAGCACTCTGGTA	NSYTVSSTLV	CAGGTGCAGCTGCAGGAGTCGGGCCCAGGACTGGTGAAGCCTTCACAGACCCTGTCCCTCACCTGCAGTGTCTCCGGTGGCTCCATCACCAGTGGTAGTTATTATTGGAGTTGGATCCGGCAGCCCGCCGGGAAGGGACTGGAGTGGATTGGGCGTATCTATACCACTGGCAACACCAACGACAACCCCTCCCTCAAGAGTCGAGTCAGCATGTCCCTAGACACGTCCAAGAACCAGTTCTCCCTGAAGTTGAGCTCTGTGACCGCCGCTGACACGGCCGTTTATTACTGTGCGAGAGGTGGATACAGCTCTGTTTTTGCCGGGTTAAATACTGTAGCCCCCCTTGACTCCTGGGGCCAAGGAACCCTGGTCACCGTCTCCTCA	CAGTCTGCCCTGACTCAGCCTGCCTCCGTGTCTGGGTCTCCTGGACAGTCGATCACCATCTCCTGCACTGGGACCAACAGTGACGTTGGTGGTTATAACTATGTCTCCTGGTACCAACAGCACCCAGGCAAAGCCCCCAAACTCATAATTTATGATGTCCATAATCGGCCCTCAGGGGTTTCTAATCGCTTCTCTGGCTCCAAGTCTGGCAACACGGCCTCCCTGACCATCTCTGGCCTCCAGGCTGAGGACGAGGCTGATTATTACTGCAACTCATATACAGTCAGCAGCACTCTGGTATTCGGCGGAGGGACCAAGCTGACCGTCCTA
11	IML3694	Acute	ADI-66175	IGHV3-30*18	IGHD3-10*01	IGHJ6*03	IGKV1-5*03	IGKJ1*01	7.1	6.3	Undefined	Yes						GCGAAACGGGGAGGCCCTTTCGAATTACGCGACTACTTCTACATGGACGTC	AKRGGPFELRDYFYMDV	CAACAGTATAAGAGTTTTTCTTCCTGGGCG	QQYKSFSSWA	CAGGTGCAGCTGGTGGAGTCTGGGGGAGGCGTGGTCCAGCCTGGGAGGTCCCTGAGACTCTCCTGTGTAGTCTCTGCATTCAGCATCAATAACTATGGCTTCTATTGGGTCCGCCAGGCTCCAGGCAAGGGGCTGGAGTGGGTGGCTGTTATATCATATGAGGGAAGTATTGAGTACTATGCAGACTCCGTGAAGGGCCGATTCACCATCTCCAAAGACAATTCGAAGAACACGGTGTATCTGCAAATGCACAGCCTGAGAACTGAGGACACGGCTGTGTATTACTGTGCGAAACGGGGAGGCCCTTTCGAATTACGCGACTACTTCTACATGGACGTCTGGGGCAAAGGGACCACGGTCACCGTCTCCTCA	GACATCCAGATGACCCAGTCTCCTTCCAGCCTGTCTGCATCTGTAGGAGACAGAGTCACCATCACTTGCCGGGCCAGTGAGAGTATTAGTGGTTGGCTGGCCTGGTATCAACAGAAACCAGGGAAAGCCCCCCACCTCCTGATCTATAAGGCGTCCACTTTAAAAAGTGGGGTCCCATCACGATTCAGCGGCAGTGGGTCTGGGACAGAATTCACTCTCACCATCAGCAGCCTGCAGCCAGATGATTTTGCAACTTATTACTGCCAACAGTATAAGAGTTTTTCTTCCTGGGCGTTCGGCCAAGGGACCAAGGTGGAAATCAAA
12	IML3694	Acute	ADI-66172	IGHV3-30*18	IGHD3-10*01	IGHJ6*03	IGKV1-5*03	IGKJ1*01	7.1	6.3	Undefined	Yes						GCGAAACGGGGAGGCCCTTTCGAATTACGCGACTACTTCTACATGGACGTC	AKRGGPFELRDYFYMDV	CAACAGTATAAGAGTTTTTCTTCCTGGGCG	QQYKSFSSWA	CAGGTGCAGCTGGTGGAGTCTGGGGGAGGCGTGGTCCAGCCTGGGAGGTCCCTGAGACTCTCCTGTGTAGTCTCTGCATTCAGCATCAATAACTATGGCTTCTATTGGGTCCGCCAGGCTCCAGGCAAGGGGCTGGAGTGGGTGGCTGTTATATCATATGAGGGAAGTATTGAGTACTATGCAGACTCCGTGAAGGGCCGATTCACCATCTCCAAAGACAATTCGAAGAACACGGTGTATCTGCAAATGCACAGCCTGAGAACTGAGGACACGGCTGTGTATTACTGTGCGAAACGGGGAGGCCCTTTCGAATTACGCGACTACTTCTACATGGACGTCTGGGGCAAAGGGACCACGGTCACCGTCTCCTCA	GACATCCAGATGACCCAGTCTCCTTCCAGCCTGTCTGCATCTGTAGGAGACAGAGTCACCATCACTTGCCGGGCCAGTGAGAGTATTAGTGGTTGGCTGGCCTGGTATCAACAGAAACCAGGGAAAGCCCCCCACCTCCTGATCTATAAGGCGTCCACTTTAAAAAGTGGGGTCCCATCACGATTCAGCGGCAGTGGGTCTGGGACAGAATTCACTCTCACCATCAGCAGCCTGCAGCCAGATGATTTTGCAACTTATTACTGCCAACAGTATAAGAGTTTTTCTTCCTGGGCGTTCGGCCAAGGGACCAAGGTGGAAATCAAA
13	IML3694	Acute	ADI-66189	IGHV3-30*18	IGHD3-3*01	IGHJ3*02	IGKV1-16*02	IGKJ4*01	11.2	5.3	Undefined	Yes						GTCAAAAGGAAAGAAATCTTCGCCCTGGGTCGTGATGGTTTTGATATC	VKRKEIFALGRDGFDI	CAACAGTATGATACTTACCCACTCACT	QQYDTYPLT	CAGGTGCAGCTGGTGGAGTCTGGGGGATCCGTGGTCCAGCCTGGGAGGTCCCTGAGACTCTCCTGTGCAACTTCTGGATTCACCTTCAATGATTATGGCATGCACTGGGTACGCCAGGCTCCAGGCAAGGGGCTGGAGTGGGTGGCATTTATATCCTATGAAGGAAGTATTAAAAAATATCTAGACGCCATGAAGGGCCGATTCATCATCTCCAGAGACAACTCCAAGAAGACGGTCTATCTGCAGATGAACAGCCTGACACCTGAGGACACGGCTATATACTATTGTGTCAAAAGGAAAGAAATCTTCGCCCTGGGTCGTGATGGTTTTGATATCTGGGGCCAAGGGACAATGGTCACCGTCTCTTCA	GACATCCAGATGACCCAGTCTCCATCCTCACTGTCTGCATCTGTTGGAGACAGAGTCACCATCACTTGTCGGGCGAGTCAGGACATTACCAATTATTTAGCCTGGTTTCAGCAGAAACCAGGGAAGGCCCCTACGTCCCTGATCTATGCTGCATCCACTTTGCAAAGTGACGTCCCATCAAAGTTCAGCGGCAGTGGGTCTGGGACAGAATTCACTCTCACTATCAGCAGCCTGCGGCCTGAAGATTCTGCAACTTATTACTGCCAACAGTATGATACTTACCCACTCACTTTCGGCGGAGGGACCAAGGTGGAGATCAAA
14	IML3694	Acute	ADI-66216	IGHV3-33*01		IGHJ4*02	IGLV3-21*02	IGLJ7*01	8.8	4.5	Undefined	No						GCGAGAACTTCGCGTCGGTTCTACATTGATTAC	ARTSRRFYIDY	CAGGTGTGGGATAGTGGGAGTGATCATTATGTC	QVWDSGSDHYV	CAGGTGCAGCTGGTGGAGTCTGGGGGAGGCGTGGTCCAGCCTGGGAGGTCCCTGAGACTCTCCTGTGCAACGTCTGGATTCACCTTCAGTAGCGCTGGCATGCACTGGGTCCGCCAGGCTCCAGGCAAGGGGCTGGAATGGGTGGCAGTTATCTCGCATGATGGAAATAACAAGTTCTACACAGACTCCGTGAAGGGCCGATTCACCATCTCCAGAGACAACTCCAAGGACACACTCTATCTGCAAATCAGCAACCTGAGAGTCGACGACACGGCTACTTATTATTGTGCGAGAACTTCGCGTCGGTTCTACATTGATTACTGGGGCCAAGGAACCCTGGTCACCGTCTCCTCA	TCCTATGTGCTGACTCAGCCACCCTCGGTGTCAGTGGCCCCAGGACAGACGGCCACGATTAACTGTGGGGGAAACGACATTGGAGGAAGTAAAGATGTACACTGGTACCAGCAGAAGCCAGGCCAGGCCCCTGTGCTGGTCGTCTATGATGATAGCGACCGGCCCCCAGGGATCCCTGAGCGATTCTCTGGCTCCAACTCTGGGGACACGGCCACCCTGACCATCAGCAGGGTCGAAGCCGGGGATGAGGCCGACTATTACTGTCAGGTGTGGGATAGTGGGAGTGATCATTATGTCTTCGGAGGAGGCACCCAGCTGACCGTCCTC
15	IML3694	Acute	ADI-66217	IGHV3-33*01	IGHD2-2*02	IGHJ4*02	IGLV3-21*03	IGLJ1*01	5.1	4.5	NTD	No						GCGAGAACTTCGCGTCGGTTCTATATTGATTAC	ARTSRRFYIDY	CAGGTGTGGGATAGTAGTACTGATCATTATGTC	QVWDSSTDHYV	CAGGTGCAGCTGGTGGAGTCTGGGGGAGGCGTGGTCCAGCCTGGGAGGTCCCTGAGACTCTCCTGCGCAACGTCTGGATTCGCCTTCAGTAGCTCTGGCATGCACTGGGTCCGCCAGGTTCCAGGCAAGGGGCTGGAGTGGGTGGCAGTTATTTGGTATGATGGAAGTAATACATACTATGCAGACTCCGTGAAGGGCCGATTCACCATCTCCAGAGACAATTCCAAGGACACCTTGTATCTGCAAATGAGCAGCCTGAGAGTCGACGACACGGCTATATATTACTGTGCGAGAACTTCGCGTCGGTTCTATATTGATTACTGGGGCCAAGGAACCCTGGTCACCGTCTCCTCA	TCCTATGTGCTGACTCAGCCACCCTCGGTGTCAGTGGCCCCAGGAAAGACGGCCAACATTACCTGTGGGGGAAACGACATTGGAGGAAGTAAAGATGTACATTGGTACCAGCAGAAGCCAGGCCAGGCCCCTGTGCTGGTCGTCTATGATGATAGCAACCGGCCCTCAGGGATCCCTGAGCGATTCTCTGGCTCCAACTCTGGGAACACGGCCACCCTGACCATCACCAGGGTCGAAGCCGGGGATGAGGCCGACTATTACTGTCAGGTGTGGGATAGTAGTACTGATCATTATGTCTTCGGAACTGGGACCAAGGTCACCGTCCTA
16	IML3694	Acute	ADI-66177	IGHV3-30*18	IGHD1-7*01	IGHJ6*03	IGKV1-5*03	IGKJ1*01	9.5	5.2	Undefined	Yes						GCGAAACGGGGAGGCCCTTTCGAACTACGCGACTACTACTACATGGACCTC	AKRGGPFELRDYYYMDL	CAGCAGTATAAGACTTATTCTCCCTGGATG	QQYKTYSPWM	CAGGTGCAGCTGGTGGAGTCTGGGGGAGGCGTGGTCCAGCCTGGGAGGTCCCTGAGACTCTCCTGTGTAGTCTCTGGATTCAGCTTCAATAACCATGGCATGAACTGGGTCCGCCAGGCTCCAGGCAAGGGACTGGAGTGGGTGGCAACTATATCATATGAAGGCAGTCTTGATTACTATGGAGACTCCGTGAAGGGCCGATTCACCGTCTCCAAAGACAATTCCAAGAACATTGTCTATCTGCACATGAACAGCCTGAGACCTGAGGACACCGCTGTATACTACTGTGCGAAACGGGGAGGCCCTTTCGAACTACGCGACTACTACTACATGGACCTCTGGGGCAAAGGGACCACGGTCACCGTCTCCTCA	GACATCCAGATGACCCAGTCTCCTTCCACCCTGTCTGCATCTATTGGAGACAGAGTCACCATCACTTGCCGGGCCAGTGAGACTATTAGTAGTTGGTTGGCCTGGTATCAGCAGAAACCAGGGAAAGCCCCCAACCTCCTGATCTATAAGGCGTCTACTTTGAAAGGTGGGGTCCCATCAAGGTTCAGCGGCAGTGGGTCTGGGACAGAATTCACTCTCACCATCAGCAGCCTGCAGCCTGATGATTTTGCAACTTATTACTGCCAGCAGTATAAGACTTATTCTCCCTGGATGTTCGGCCAAGGGACCAAGGTGGAAATCAAA
17	IML3694	Acute	ADI-66215	IGHV3-30*18	IGHD3-3*01	IGHJ6*03	IGKV3-20*01	IGKJ4*01	0	0	Undefined	No						GCGAAAGATCAGGCGTATTACGATTTTTGGAGTGGTTATTTGGCTAAATCGGAAGCCGATTACTACTACTACTACTACATGGACGTC	AKDQAYYDFWSGYLAKSEADYYYYYYMDV	CAGCAGTATGGTAGCTCACCGCTCACT	QQYGSSPLT	CAGGTGCAGCTGGTGGAGTCTGGGGGAGGCGTGGTCCAGCCTGGGAGGTCCCTGAGACTCTCCTGTGCAGCCTCTGGATTCACCTTCAGTAGCTATGGCATGCACTGGGTCCGCCAGGCTCCAGGCAAGGGGCTGGAGTGGGTGGCAGTTATATCATATGATGGAAGTAATAAATACTATGCAGACTCCGTGAAGGGCCGATTCACCATCTCCAGAGACAATTCCAAGAACACGCTGTATCTGCAAATGAACAGCCTGAGAGCTGAGGACACGGCTGTGTATTACTGTGCGAAAGATCAGGCGTATTACGATTTTTGGAGTGGTTATTTGGCTAAATCGGAAGCCGATTACTACTACTACTACTACATGGACGTCTGGGGCAAAGGGACCACGGTCACC…	GAAATTGTGTTGACGCAGTCTCCAGGCACCCTGTCTTTGTCTCCAGGGGAAAGAGCCACCCTCTCCTGCAGGGCCAGTCAGAGTGTTAGCAGCAGCTACTTAGCCTGGTACCAGCAGAAACCTGGCCAGGCTCCCAGGCTCCTCATCTATGGTGCATCCAGCAGGGCCACTGGCATCCCAGACAGGTTCAGTGGCAGTGGGTCTGGGACAGACTTCACTCTCACCATCAGCAGACTGGAGCCTGAAGATTTTGCAGTGTATTACTGTCAGCAGTATGGTAGCTCACCGCTCACTTTCGGCGGAGGGACCAAGGTGGAGATCAAA
18	IML3694	Acute	ADI-66218	IGHV3-33*01		IGHJ4*02	IGLV3-21*03	IGLJ1*01	4.8	4.1	NTD	No						GCGAGAACTTCGCGTCGGTTCTACATTGATTAC	ARTSRRFYIDY	CAGGTGTGGGATAGTAATACTGATCATTATGTC	QVWDSNTDHYV	CAGGTGCAGCTGGTGGAGTCTGGGGGAGGCGTGGTCCAGCCTGGGAGGTCCCTGAGACTCTCCTGTGCAACGTCTGGATTCACCTTCAGTAGTTCTGGCATGCACTGGGTCCGCCAGGTTCCAGGCAAGGGGCTGGAGTGGGTGGCAGTTATTTGGTATGATGGAAGTAATAAATACTACGCAGACTCCGTGATGGGCCGATTCACCATCTCCAGAGACAATTCCAACGACACGCTGTATCTGCAAATGAGCAGCCTGAGAGTCGAGGACACGGCTATATATTATTGTGCGAGAACTTCGCGTCGGTTCTACATTGATTACTGGGGCCAAGGAACCCTGGTCACCGTCTCCTCA	TCCTATGTGCTGACTCAGCCACCCTCGGTGTCAGTGGCCCCAGGAACGACGGCCAGGATTACCTGTGGGGGAAACGACATTGGCGGCAGTAAAGATGTACACTGGTACCAGCAGAAGCCAGGCCAGGCCCCTGTACTGGTCGTCTATGATGATAGCGACCGGCCCTCAGGGATCCCTGAGCGATTCTCTGGCTCCAACTCTGGGAACACGGCCACCCTGACCATCAGCAGGGTCGAAGCCGGGGATGAGGCCGACTATTACTGTCAGGTGTGGGATAGTAATACTGATCATTATGTCTTCGGAACTGGGACCAAGGTCACCGTCCTA
19	IML3694	Acute	ADI-66204	IGHV4-61*11	IGHD5-18*01	IGHJ4*02	IGLV2-14*01	IGLJ7*01	5.4	3.7	S2	No						GCGAGAGGTGGATACAGCTCTGTTTTTGCCGGGTTAAATACTGTAGCCCCCCTTGACTCC	ARGGYSSVFAGLNTVAPLDS	AACTCATATACAGTCAGCAGCACTCTGGTA	NSYTVSSTLV	CAGGTGCAGCTGCAGGAGTCGGGCCCAGGACTGGTGAAGCCTTCACAGACCCTGTCCCTCACCTGCAGTGTCTCCGGTGGCTCCATCAGCAGTGGTAGTTACTATTGGAGTTGGATCCGGCAGCCCGCCGGTAAGGGACTGGAGTGGATTGGGCGGATCTATACCACTGGCAACACCAACGACAACCCCTCCCTCAAGAGTCGAGTCACCATGTCCCTAGACACGTCCAAGAACCAGTTCTCCCTGAAGTTGAGGTCTGTGACCGCCGCTGACACGGCCGTATATTACTGTGCGAGAGGTGGATACAGCTCTGTTTTTGCCGGGTTAAATACTGTAGCCCCCCTTGACTCCTGGGGCCAAGGAACCCTGGTCACCGTCTCCTCA	CAGTCTGCCCTGACTCAGCCTGCCTCCGTGTCTGGGTCTCCTGGACAGTCGATCACCATCTCCTGCACTGGGACCAACAGTGACGTTGGTGGTTATAACTATGTCTCCTGGTACCAACAGCACCCAGGCAAAGCCCCCAAACTCATAATTTATGATGTCCATAATCGGCCCTCAGGGGTTTCTGATCGCTTCTCTGGCTCCAAGTCTGGCAACACGGCCTCCCTGACCATCTCTGGCCTCCAGGCTGAGGACGAGGCTGATTATTACTGCAACTCATATACAGTCAGCAGCACTCTGGTATTCGGAGGAGGCACCCAGCTGACCGTCCTC
20	IML3694	Acute	ADI-66176	IGHV3-30*18	IGHD3-10*01	IGHJ6*03	IGKV1-5*03	IGKJ1*01	8.5	6.7	Undefined	Yes						GCGAAACGGGGAGGCCCTTTCGAATTACGCGACTACTTCTACATGGACGTC	AKRGGPFELRDYFYMDV	CAACAGTATAAGAGTTTTTCTTCCTGGGCG	QQYKSFSSWA	CAGGTGCAGCTGGTGGAGTCTGGGGGAGGCGTGGTCCCGCCTGGGAGGTCCCTGAGACTCTCCTGTCTAGTCTCTGCATTGAGCATCAATAACTATGGCATGTATTGGGTCCGCCAGGCTCCAGGCAAGGGGCTGGAGTGGGTGGCTGTTATATCATATGAGGGAAGTATTGAGTATTATGCAGACTCCGTGAAGGGCCGATTCACCATCTCCAAAGACAATTCGAAGAACACGGTATATTTGCAAATGCACAGCCTGAGAACTGAGGACACGGCTGTGTATTACTGTGCGAAACGGGGAGGCCCTTTCGAATTACGCGACTACTTCTACATGGACGTCTGGGGCAAAGGGACCACGGTCACCGTCTCCTCA	GACATCCAGATGACCCAGTCTCCTTCCAGCCTGTCTGCATCTGTAGGAGACAGAGTCACCATCACTTGCCGGGCCAGTGAGAGTATTAGTGGTTGGCTGGCCTGGTATCAACAGAGACCAGGGAAAGCCCCCCACCTCCTGATCTATAAGGCGTCCACTTTAAAAAGTGGGGTCCCATCACGATTCAGCGGCAGTGGGTCTGGGACAGAATTCACTCTCACCATCAGCAGCCTGCAGCCAGATGATTTTGCAACTTATTACTGCCAACAGTATAAGAGTTTTTCTTCCTGGGCGTTCGGCCAAGGGACCAAGGTGGAAATCAAA
21	IML3694	Acute	ADI-66205	IGHV1-3*01		IGHJ5*02	IGKV3-20*01	IGKJ2*01	11.9	6.3	RBD	No						TCGAGAAATCAGGACCCGCCGCACATCTGCTTCGACCCT	SRNQDPPHICFDP	CAGCAGTATTTGAGCTCGTACACT	QQYLSSYT	CAGGTCCAGCTTGTGCAGTCTGGGGCTGAGGTGAGGAAGCCTGGGGCCTCAGTGAAGGTTTCCTGCAAGGCCTCTGGATACATCTTCACTTCCTACGCTATCCATTGGGTGCGCCAGGCCCCCGGACAAAGCCTTGAGTGGATGGGATTGATCAACGGTGACAGTGGTAGCACAATGTATTCACAGAGATTCCAGGGCAGAGTCACCATTACCAGGGACCAGACCGCGAGTACAAGTTACATGGAGTTGACTGGTCTGACATATGAAGACACGGCTGTTTATTATTGTTCGAGAAATCAGGACCCGCCGCACATCTGCTTCGACCCTTGGGGCCAGGGAACCCTGGTCACCGTCTCCTCA	GAAATTGTGTTGACGCAGTCTCCAGGCACCCTGTCTTTGTCTCCAGGAGAAAGAGCCACCCTCTCCTGCAGGGCCAGTCAGAGTGTTACCAGAAACAACGTAGCCTGGTACCAGCAGAAACCTGGGCAGGCTCCCAGGCTCATTATGTATGGTGCATCCAGTAGGGCCACAGGCATCCCAGACAGGTTCAGTGGCAGTGGGTCTGGGACAGACTTCACTCTCACCATCACCAAACTGGAGCCTGAGGATTTTGCAGTGTATTACTGTCAGCAGTATTTGAGCTCGTACACTTTTGGCCAGGGGACCAAGCTGGAGATCAAA
22	IML3694	Acute	ADI-66198	IGHV3-9*01	IGHD6-13*01	IGHJ4*02	IGLV2-14*01	IGLJ2*01	4.4	3	NTD	No						GCAAAGGGTGATAGCAGCAGCTGGTACTTTAATAGTTTTGACTTC	AKGDSSSWYFNSFDF	AGCTCATATACAACTAGCGGCACTCTTGTACTA	SSYTTSGTLVL	GAAGTGCAGCTGGTGGAGTCTGGGGGAGACTTGGTACAGCCTGGCAGGTCCCTGAGAGTCTCCTGTGCAGCCTCTGGATTCAGTTTTGATGATTATGGCATGCACTGGGTCCGGCAAGCTCCAGGGAAGGGCCTGGAGTGGGTCTCAGGTATTAGTTGGAATAGTGATAACATAGCCTATGCGGACTCTGTGAAGGGCCGATTCACCATCTCCAGAGACAACGCCAAGAATTCCCTGTATCTGCACATGGACAGTCTGAGAGCTGAGGACACGGCCCGGTATTACTGTGCAAAGGGTGATAGCAGCAGCTGGTACTTTAATAGTTTTGACTTCTGGGGCCAAGGAACCCTGGTCACCGTCTCCTCA	CAGTCTGCCCTGACTCAGCCTGCCTCCGTGTCTGGGTCTCCTGGACAGTCGATCACCATCTCCTGCACTGGAACCAGCAGTGACATTGGTGTTTATAACTATGTCTCCTGGTACCAACAGCACCCAGGCAAGGCCCCCAAACTCATGATTTATGATGTCAGTAATCGGCCCTCAGGGGTTTCTGATCGCTTCTCTGGCTCCAAGTCTGGCAACACGGCCTCCCTGACCATCTCTGGGCTCCAGGCTGAGGACGAGGCTGCTTATTACTGCAGCTCATATACAACTAGCGGCACTCTTGTACTATTCGGCGGAGGGACCAAGCTGACCGTCCTA
23	IML3694	Acute	ADI-66231	IGHV3-30-3*01	IGHD3-3*01	IGHJ4*02	IGKV4-1*03	IGKJ4*01	7.1	2.3	Undefined	No						GTGAGACAATCCCTCCATCACATATTTTGGAGTGGTTTCTACTACTTTGACTCC	VRQSLHHIFWSGFYYFDS	CAGCAATATTATAGTACTCCCACT	QQYYSTPT	CAGGTGCAGCTGGTGGAGTCTGGGGGAGGCGTGGTCCAGCCTGGGAGGACCCTGAGACTCTCCTGTGAAGCCTCTGGATTCAATTTCCATAGTTATGCTATGCACTGGGTCCGCCAGGCTCCAGGCAAGGGGCTGGAGTGGGTGGCAGTTATCTCATATGATGACAACAATAAGTACTACGCAAACTCCGTGCAAGGCCGATTCACCATCTCCAGAGACAATTCCAAGAACACCCTGTTTCTGCAGATGAGCAGCCTGAGAGCTGAGGACTCGGCTGTGTATTACTGTGTGAGACAATCCCTCCATCACATATTTTGGAGTGGTTTCTACTACTTTGACTCCTGGGGCCAAGGAACCCTGGTCACCGTCTCCTCA	GACATCGTGATGACCCAGTCTCCAGACTCCCTGGCTGTGTCTCTGGGCGAGAGGGCCACCATCAAATGCAAGTCCAGCGAGAGTATTTTACACAACTCCAACAATAAGAACTACTTAGCTTGGTACCAGCAGAAACCAGGACAGCCTCCTAAGTTGCTCATTTACTGGGCGTCTACCCGGGAATCCGGGGTCCCTGACCGATTCAGTGGCAGCGGGTCTGGGACAGATTTCACTCTCACCATCAGCAGCCTGCAGGCTGAAGATGTGGCAGTTTATTTCTGTCAGCAATATTATAGTACTCCCACTTTCGGCGGAGGGACCAAGGTGGAGATCAAA
24	IML3694	Acute	ADI-66206	IGHV3-21*01	IGHD4-17*01	IGHJ6*02	IGLV3-21*04	IGLJ2*01	0	0	RBD	No						GCGAGAGATGTGAGTTCCCCACTTCACGGTGACCACCCGGACTGGTACTACGGTATGGACGTC	ARDVSSPLHGDHPDWYYGMDV	CAGGTGTGGGATAGTAGTAGTGATCATCGGGTA	QVWDSSSDHRV	GAGGTGCAGCTGGTGGAGTCTGGGGGAGGCCTGGTCAAGCCTGGGGGGTCCCTGAGACTCTCCTGTGCAGCCTCTGGATTCACCTTCAGTAGCTATAGCATGAACTGGGTCCGCCAGGCTCCAGGGAAGGGGCTGGAGTGGGTCTCATCCATTAGTAGTAGTAGTAGTTACATATACTACGCAGACTCAGTGAAGGGCCGATTCACCATCTCCAGAGACAACGCCAAGAACTCACTGTATCTGCAAATGAACAGCCTGAGAGCCGAGGACACGGCTGTGTATTACTGTGCGAGAGATGTGAGTTCCCCACTTCACGGTGACCACCCGGACTGGTACTACGGTATGGACGTCTGGGGGCAAGGGACCACGGTCACCGTCTCCTCA	TCCTATGTGCTGACTCAGCCACCCTCAGTGTCAGTGGCCCCAGGAAAGACGGCCAGGATTACCTGTGGGGGAAACAACATTGGAAGTAAAAGTGTGCACTGGTACCAGCAGAAGCCAGGCCAGGCCCCTGTGCTGGTCATCTATTATGATAGCGACCGGCCCTCAGGGATCCCTGAGCGATTCTCTGGCTCCAACTCTGGGAACACGGCCACCCTGACCATCAGCAGGGTCGAAGCCGGGGATGAGGCCGACTATTACTGTCAGGTGTGGGATAGTAGTAGTGATCATCGGGTATTCGGCGGAGGGACCAAGCTGACCGTCCTA
25	IML3694	Acute	ADI-66219	IGHV1-46*03	IGHD2-8*01	IGHJ6*02	IGLV3-1*01	IGLJ1*01	0	0	NTD	No						GCTAGAGATTTATTTCAGGTTTCACCTAATCCGGGGTACTACGGTATGGACGTC	ARDLFQVSPNPGYYGMDV	CAGGCGTGGGACAGCAGCACTGGGGTC	QAWDSSTGV	CAGGTGCAGCTGGTGCAGTCTGGGGCTGAGGTGAAGAAGCCTGGGGCCTCAGTGAAGGTTTCCTGCAAGGCATCTGGATACACCTTCACCAGCTACTATATGCACTGGGTGCGACAGGCCCCTGGACAAGGGCTTGAGTGGATGGGAATAATCAACCCTAGTGGTGGTAGCACAAGCTACGCACAGAAGTTCCAGGGCAGAGTCACCATGACCAGGGACACGTCCACGAGCACAGTCTACATGGAGCTGAGCAGCCTGAGATCTGAGGACACGGCCGTGTATTACTGTGCTAGAGATTTATTTCAGGTTTCACCTAATCCGGGGTACTACGGTATGGACGTCTGGGGGCAAGGGACCACGGTCACCGTCTCCTCA	TCCTATGAGCTGACTCAGCCACCCTCAGTGTCCGTGTCCCCAGGACAGACAGCCAGCATCACCTGCTCTGGAGATAAATTGGGGGATAAATATGCTTGCTGGTATCAGCAGAAGCCAGGCCAGTCCCCTGTGCTGGTCATCTATCAAGATAGCAAGCGGCCCTCAGGGATCCCTGAGCGATTCTCTGGCTCCAACTCTGGGAACACAGCCACTCTGACCATCAGCGGGACCCAGGCTATGGATGAGGCTGACTATTACTGTCAGGCGTGGGACAGCAGCACTGGGGTCTTCGGAACTGGGACCAAGGTCACCGTCCTA
26	IML3694	Acute	ADI-66199	IGHV3-9*01	IGHD6-13*01	IGHJ4*02	IGLV2-14*01	IGLJ2*01	4.4	3	NTD	No						GCAAAGGGTGATAGCAGCAGCTGGTACTTTAATAGTTTTGACTTC	AKGDSSSWYFNSFDF	AGCTCATATACAACTAGCGGCACTCTTGTACTA	SSYTTSGTLVL	GAAGTGCAGCTGGTGGAGTCTGGGGGAGACTTGGTACAGCCTGGCAGGTCCCTGAGAGTCTCCTGTGCAGCCTCTGGATTCAGTTTTGATGATTATGGCATGCACTGGGTCCGGCAAGCTCCAGGGAAGGGCCTGGAGTGGGTCTCAGGTATTAGTTGGAATAGTGATAACATAGCCTATGCGGACTCTGTGAAGGGCCGATTCACCATCTCCAGAGACAACGCCAAGAATTCCCTGTATCTGCACATGGACAGTCTGAGAGCTGAGGACACGGCCCGGTATTACTGTGCAAAGGGTGATAGCAGCAGCTGGTACTTTAATAGTTTTGACTTCTGGGGCCAAGGAACCCTGGTCACCGTCTCCTCA	CAGTCTGCCCTGACTCAGCCTGCCTCCGTGTCTGGGTCTCCTGGACAGTCGATCACCATCTCCTGCACTGGAACCAGCAGTGACATTGGTGTTTATAACTATGTCTCCTGGTACCAACAGCACCCAGGCAAGGCCCCCAAACTCATGATTTATGATGTCAGTAATCGGCCCTCAGGGGTTTCTGATCGCTTCTCTGGCTCCAAGTCTGGCAACACGGCCTCCCTGACCATCTCTGGGCTCCAGGCTGAGGACGAGGCTGCTTATTACTGCAGCTCATATACAACTAGCGGCACTCTTGTACTATTCGGCGGAGGGACCAAGCTGACCGTCCTA
27	IML3694	Acute	ADI-66220	IGHV3-30-3*01	IGHD2-2*01	IGHJ6*03	IGKV1-5*03	IGKJ1*01	0	0	NTD	No						GCGAGAGATCATTGTAGTAGTACCATTAGCCTGTGTGAGAACTACATGGACGTC	ARDHCSSTISLCENYMDV	CAACAGTATAATAGTTATTGGACG	QQYNSYWT	CAGGTGCAGCTGGTGGAGTCTGGGGGAGGCGTGGTCCAGCCTGGGAGGTCCCTGAGACTCTCCTGTGCAGCCTCTGGATTCACCTTCAGTAGCTATGCTATGCACTGGGTCCGCCAGGCTCCAGGCAAGGGGCTGGAGTGGGTGGCAGTTATATCATATGATGGAAGCAATAAATACTACGCAGACTCCGTGAAGGGCCGATTCACCATCTCCAGAGACAATTCCAAGAACACGCTGTATCTGCAAATGAACAGCCTGAGAGCTGAGGACACGGCTGTGTATTACTGTGCGAGAGATCATTGTAGTAGTACCATTAGCCTGTGTGAGAACTACATGGACGTCTGGGGCAAAGGGACCACGGTCACCGTCTCCTCA	GACATCCAGATGACCCAGTCTCCTTCCACCCTGTCTGCATCTGTAGGAGACAGAGTCACCATCACTTGCCGGGCCAGTCAGAGTATTAGTAGCTGGTTGGCCTGGTATCAGCAGAAACCAGGGAAAGCCCCTAAGCTCCTGATCTATAAGGCGTCTAGTTTAGAAAGTGGGGTCCCATCAAGGTTCAGCGGCAGTGGATCTGGGACAGAATTCACTCTCACCATCAGCAGCCTGCAGCCTGATGATTTTGCAACTTATTACTGCCAACAGTATAATAGTTATTGGACGTTCGGCCAAGGGACCAAGGTGGAAATCAAA
28	IML3694	Acute	ADI-66171	IGHV3-30*18	IGHD3-16*02	IGHJ6*03	IGKV3-20*01	IGKJ1*01	9.2	5.6	Undefined	Yes						GCGAAACGAGGAGGCCCTTTCGAGTTATCCTTTTACTACTACATGGACGTC	AKRGGPFELSFYYYMDV	CACCAGTATGGGAGCTCACACCCGACG	HQYGSSHPT	CAGGTGCAGCTGGTGGAGTCTGGGGGAGGCGTGGTCCAGGCTGGGAGGTCCCTGAGACTCTCCTGTGAAGCCTCTGGATTCTCCTTCAATAACTATGGCATAAATTGGGTCCGCCAGGCTCCGGGCAAGGGTCTGGAGTGGGTGGCGACTATTTCATATGAGGGAAGTAATCAATACTATGCAGACTCCGTGAAGGGCCGATTCATCATCTCCAAAGACAACTCCAAGAACACGGTGAGTCTGCAACTGAACAGCCTGAGAAGTGAGGACACGGCCGTCTATTACTGTGCGAAACGAGGAGGCCCTTTCGAGTTATCCTTTTACTACTACATGGACGTCTGGGGCAAAGGGACCACGGTCACCGTCTCCTCA	GAAATTGTGTTGACGCAGTCTCCAGGCACCCTGTCTTTGTCTCCCGGGGAAAGAGCCACCCTCTCCTGCAGGGCCAGTCAGAGTGTTAGAAGCAACAACTTAGCCTGGTACCGACACAAACCTGGCCAGGCTCCCAGGCTCATCATCTATGGTGCATCCACCAGGGCCACTGGCATCCCAGACAGGTTCAGTGGCAGTGGGTCTGGGACAGACTTCACTCTCACCATCAGCAGTCTGGAGCCTGACGATTTTGAGGTCTATTACTGTCACCAGTATGGGAGCTCACACCCGACGTTCGGCCAAGGGACCAAGGTGGAAATCAAA
29	IML3694	Acute	ADI-66222	IGHV3-30-3*01	IGHD3-3*01	IGHJ6*03	IGKV3-20*01	IGKJ1*01	5.4	4.8	Undefined	No						GCGAGAGATTGGAGATATTACGATTTTTGGAGTGGTTATTTGTCAGACGCACTGAAGGACCACTACTACTATATGGACGTC	ARDWRYYDFWSGYLSDALKDHYYYMDV	CAGCAGTATGTTGGCTCACCTCCGTACACT	QQYVGSPPYT	CAGGTGCAGCTGGTGGAGTCTGGGGGAGGCGTGGTCCACCCTGGGAGGTCCCTCAGACTCTCCTGTGCAGCCTCTGGATTCACCTTCAGTAACTTTGCTATGCACTGGGTCCGCCTGGCTCCAGGCAAGGGGCTGGAGTGGCTGTCAGTTATATCCTATGATGGAAGCACTAAATACTACGCAGACTCCGTGAAGGGCCGATTCACCGTCTCCAGAGACAGTTCCACGAACACGCTTTATCTGCAAATGGACAGCCTGAGACCTGAGGACACGGCTCTGTATTACTGTGCGAGAGATTGGAGATATTACGATTTTTGGAGTGGTTATTTGTCAGACGCACTGAAGGACCACTACTACTATATGGACGTCTGGGGCAAAGGGACCACGGTCACCGTCTCC…	GAAATTGTGTTGACGCAGTCTCCAGGCACCCTGTCTTTGTCTCCAGGGGAAAGAGCCACCCTCTCCTGCAGGGCCAGTCAGAATGTTATCAACTACTTAGCCTGGTACCAGCACAAACCTGACCAGCCTCCCAGGCTCCTCATCTCTGGTGCATCCGCCAGGGCCACTGGCATCCCAGACAGGTTCAGTGGCAGTGGGTCTGGGACAGACTTCACTCTCACCATCAGCAGACTGGAGCCTGAAGATTTTGCAGTGTATTACTGTCAGCAGTATGTTGGCTCACCTCCGTACACTTTCGGCCAAGGGACCAAGGTGGAAATCAAA
30	IML3694	Acute	ADI-66173	IGHV3-30*18	IGHD1-26*01	IGHJ6*03	IGKV3-20*01	IGKJ1*01	7.5	3.1	Undefined	Yes						GCGAAACGAGGAGGCCCTTTCGAGCTATCTAACTACTACTATATGGACGTC	AKRGGPFELSNYYYMDV	CACCAGTATGGGAGTTCACACCCGACG	HQYGSSHPT	CAGGTGCAGCTGGTGGAGTCTGGGGGAGGCGTGGTCCAGCCTGGGAGGTCCCTGAGACTCTCCTGTGAAGCCTCTGGATTCACGTTCAATAACTATGGCATAAATTGGGTCCGCCAGGCTCCGGGCAAGGGGCTGGAGTGGGTGGCAACTATCTCATATGAGGGAAGTATTGAATATTATGCAGTCTCCGTGAAGGGCCGATTCACCATCTCCAGAGACAATTCCAAGAACACAGTGTCCCTGCAAATGAACAGCCTGAGACCTGAGGACACGGCTGTCTATTACTGTGCGAAACGAGGAGGCCCTTTCGAGCTATCTAACTACTACTATATGGACGTCTGGGGCAAAGGGACCACGGTCACCGTCTCCTCA	GAAATTGTGTTGACGCAGTCTCCAGGCACCCTGTCTTTGTCTCCAGGGGAAAGAGCCACCCTCTCCTGCAGGGCCAGTCAGAGTGTTAGAAGCAACTACTTAGCCTGGTACCAGCACAAACCTGGCCAGGCTCCCAGGCTCCTCATCTATGGTGCATCCAGCAGGGCCACTGGCATCCCAGAGAGGTTCAGTGGCGGTGGGTCTGGGACAGACTTCACTCTCACCATCAGCAGACTGGAGCCTGAAGATTTTGAAGTGTATTACTGTCACCAGTATGGGAGTTCACACCCGACGTTCGGCCAAGGGACCAAGGTGGAAATCAAA
31	IML3694	Acute	ADI-66224	IGHV3-7*01	IGHD3-3*01	IGHJ4*02	IGKV1-5*03	IGKJ2*01	0	0	NTD	No						GCGAGAGATCCCGATTACGATTTTTGGAGTGGTTATTATAGGGCTTATGACTAC	ARDPDYDFWSGYYRAYDY	CAACAGTATAATAGTTATCCGTACACT	QQYNSYPYT	GAGGTGCAGCTGGTGGAGTCTGGGGGAGGCTTGGTCCAGCCTGGGGGGTCCCTGAGACTCTCCTGTGCAGCCTCTGGATTCACCTTTAGTAGCTATTGGATGAGCTGGGTCCGCCAGGCTCCAGGGAAGGGGCTGGAGTGGGTGGCCAACATAAAGCAAGATGGAAGTGAGAAATACTATGTGGACTCTGTGAAGGGCCGATTCACCATCTCCAGAGACAACGCCAAGAACTCACTGTATCTGCAAATGAACAGCCTGAGAGCCGAGGACACGGCTGTGTATTACTGTGCGAGAGATCCCGATTACGATTTTTGGAGTGGTTATTATAGGGCTTATGACTACTGGGGCCAAGGAACCCTGGTCACCGTCTCCTCA	GACATCCAGATGACCCAGTCTCCTTCCACCCTGTCTGCATCTGTAGGAGACAGAGTCACCATCACTTGCCGGGCCAGTCAGAGTATTAGTAGCTGGTTGGCCTGGTATCAGCAGAAACCAGGGAAAGCCCCTAAGCTCCTGATCTATAAGGCGTCTAGTTTAGAAAGTGGGGTCCCATCAAGGTTCAGCGGCAGTGGATCTGGGACAGAATTCACTCTCACCATCAGCAGCCTGCAGCCTGATGATTTTGCAACTTATTACTGCCAACAGTATAATAGTTATCCGTACACTTTTGGCCAGGGGACCAAGCTGGAGATCAAA
32	IML3694	Acute	ADI-66221	IGHV3-30-3*01	IGHD3-3*01	IGHJ6*03	IGKV3-20*01	IGKJ1*01	3.7	4.1	NTD	No						GCGAGAGATTGGAGATATTACGATTTTTGGAGTGGTTATTTGTCAGACGCACTGAAGGACCACTACTACTATATGGACGTC	ARDWRYYDFWSGYLSDALKDHYYYMDV	CAGCAGTATGTTGGCTCACCTCCGTACACT	QQYVGSPPYT	CAGGTGCAGCTGGTGGAGTCTGGGGGAGGCGTGGTCCAGCCTGGGAGGTCCCTGAGACTCTCCTGTGCAGCCTCTGGATTCACCTTCAGTAACTTTGCTATGCACTGGGTCCGCCTGGCTCCAGGCAAGGGGCTGGAGTGGGTGTCAGTTATATCCTATGATGGAAGCAGTAAATACTACGCAGACTCCGTGAAGGGCCGATTCACCATCTCCAGAGACAGTTCCACGAACACGCTTTATCTGCAAATGGACAGCCTGAGAGGTGAGGACACGGCTGTGTATTACTGTGCGAGAGATTGGAGATATTACGATTTTTGGAGTGGTTATTTGTCAGACGCACTGAAGGACCACTACTACTATATGGACGTCTGGGGCAAAGGGACCACGGTCACCGTCTCC…	GAAATTGTGTTGACGCAGTCTCCAGGCACCCTGTCTTTGTCTCCAGGGGAAAGAGCCACCCTCTCCTGCAGGGCCAGTCAGAATGTTATCAACTACTTAGCCTGGTACCAGCACAAACCTGACCAGCCTCCCAGGCTCCTCATCTCTGGTGCATCCAGCAGGGCCACTGGCATCCCAGACAGGTTCAGTGGCAGTGGGTCTGGGACAGACTTCACTCTCACCATCAGCAGACTGGAGCCTGAAGATTTTGCAGTGTATTACTGTCAGCAGTATGTTGGCTCACCTCCGTACACTTTCGGCCAAGGGACCAAGGTGGAAATCAAA
33	IML3694	Acute	ADI-66170	IGHV4-61*11	IGHD3-16*02	IGHJ4*02	IGKV4-1*01	IGKJ3*01	7.1	2.6	S2	Yes						GCGAGGGGGGGAAACTTCTTTGACTCC	ARGGNFFDS	CAGCAATATTACAGTACTCCCCTCACT	QQYYSTPLT	CAGGTGCAGCTGCAGGAGTCGGGCCCAGGACTGGTGAAGCCTTCACAGACCCTGTCCCTCACCTGCACTGTCTCTGGTGACTCCATCAGCAGTGGTGGTTACCTCTGGAGCTGGATCCGGCAGCCCGCCGGGAAGGGTCTGGAGTGGATTGGGCGGATGCACTCCAGTGGGAGCACCAACTACAATTCCTCCCTCAAGAGTCGAGTCAGCATGTCTGTGGACATGTCCAAGAACCAGTTCTCCCTGAACCTGAGGTCTGTGACGGCCGCAGACACGGCCGTCTATTTCTGTGCGAGGGGGGGAAACTTCTTTGACTCCTGGGGCCAAGGAACCCTGGTCACCGTCTCCTCA	GACATCGTGATGACCCAGTCTCCAGAGTCCCTGGCTGTGTCTCTGGGCGAGAGGGCCACCATCAACTGCAAGTCCAGCCAGAGTGTTTTATACAGGTCCAACGACAATAAGAACTACTTAGCTTGGTACCAGCAGAAACCAGGACAGCCTCCTAAGGTGCTCATTTACTGGGCATCTACCCGGGAATCCGGGGTCCCTGACCGATTCAGTGGCAGCGGGTCTGAGACAGATTTCACTCTCACCATCAGCAGCCTGCAGGCTGAAGATGTGGCAGTTTATTACTGTCAGCAATATTACAGTACTCCCCTCACTTTCGGCCCTGGGACCAAAGTGGATATCAAA
34	IML3694	Acute	ADI-66223	IGHV3-33*01	IGHD3-10*01	IGHJ6*02	IGKV1-8*01	IGKJ1*01	6.1	3.5	NTD	No						GCGAGAGCGAACTATGGTTCACGCAATTATTATAACCCGGAGTATGACCACGGTTTGGACGTC	ARANYGSRNYYNPEYDHGLDV	CAACAATATTATAGTTACCCTCGGACT	QQYYSYPRT	CAGGTGCAGCTGGTGGAGTCTGGGGGAGGCGTGGTCCAGCCTGGGAGGTCCCTGAGACTCTCCTGTGCAGCGTCTGGATTTATCTTCAGTACCTATGGCATGCACTGGGTCCGCCAGGCTCCAGACAAGGGGCTGGAGTGGGTGGCTGTTATTTCGTTTGATGGAACTGATGAATACTATGCAGAGTCCGTGAAGGGCCGATTCACCATCTCCAGAGACAATTCCAAGAATACTATGTATTTGCAAATGAACAGCCTGAGAGCCGAGGACACGGCTGTTTATCACTGTGCGAGAGCGAACTATGGTTCACGCAATTATTATAACCCGGAGTATGACCACGGTTTGGACGTCTGGGGGCAAGGGACCACGGTCACCGTCTCCTCA	GCCATCCGGATGACCCAGTCTCCATCCTCATTCTCTGCATCTACAGGAGACAGAATCTCCATCACTTGTCGGGCGAGTCAGGGTATTAGTAATGATGTAGCCTGGTATCAGCAAAAACCAGGGAAAGCCCCTAACCTCCTGATCTATGCTGCATCCACTTTGCAAAGTGGGGTCCCATTAAGGTTCAGCGGCAGTGGATCTGGGACAGATTTCACTCTCACCATCAGCTCCCTGCAGTCTGAAGATTTTGCAACTTATTACTGTCAACAATATTATAGTTACCCTCGGACTTTCGGCCAAGGGACCAAGGTGGAAATCAAA
35	IML3694	Acute	ADI-66190	IGHV3-30*18	IGHD5-18*01	IGHJ3*02	IGKV1-16*02	IGKJ4*01	12.2	4.6	Undefined	Yes						GTCAAAAGGAAAGCTATCTTCGCCCTGGGTCGTGATGGTTTTGATATC	VKRKAIFALGRDGFDI	CAACAGTATGATACTTACCCACTCACT	QQYDTYPLT	CAGGTGCAGCTGGTGGAGTCTGGGGGATCCGTGGTCCAGCCAGGGAGGTCCCTGAGACTCTCCTGTGCAACTTCTGGATTCACCTTCAATGATTATGGCTTGCACTGGGTACGCCAGGCTCCAGGCAAGGGGCTGGAGTGGGTGGCATCTATATCCTATGAAGGAAGTATTAAAAAATATCTAGACTCCATGAAGGGCCGATTCATCATCTCCAGAGACAGCTCCAAGAAGACGGTGTATATGCAGATGAACAGCCTGACACCTGAGGACACGGCTATATACTATTGTGTCAAAAGGAAAGCTATCTTCGCCCTGGGTCGTGATGGTTTTGATATCTGGGGCCAAGGGACAATGGTCACCGTCTCTTCA	GACATCCAGATGACCCAGTCTCCATCCTCACTGTCTGCATCTGTTGGAGACAGAGTCACCATCACTTGTCGGGCGAGTCAGGGCATTACCAATTATTTAGCCTGGTTTCAGCAGAAACCAGGGAAGGCCCCTACGTCCCTGATCTATGCTGCATCCACTTTGCAAAGTGACGTCCCATCAAAGTTCAGCGGCAGTGGGTCTGGGACAGAATTCACTCTCACTATCAGCAGCCTGCAGCCTGAAGATTCTGCAACTTATTACTGCCAACAGTATGATACTTACCCACTCACTTTCGGCGGAGGGACCAAGGTGGAGATCAAA
36	IML3694	Acute	ADI-66174	IGHV3-30*18	IGHD3-10*01	IGHJ6*03	IGKV1-5*03	IGKJ1*01	8.2	6.6	Undefined	Yes						GCGAAACGGGGAGGCCCTTTCGAGTTACGCGACTACTACTACATGGACGTC	AKRGGPFELRDYYYMDV	CAACAGTACAAGACTTACTCTCCCTGGGCG	QQYKTYSPWA	CAGGTGCAGCTGGTGGAGTCTGGGGGAGGCGTGGTCCAGCCTGGGAGGTCCCTAAGACTCTCCTGTGCAGTCTCTGGATTCAGCTTCAATAACTATGGCATGTACTGGGTCCGCCAGGCTCCAGGCAAGGGGCTGGAGTGGGTGGCAGCTATATCATATGAGGGAAGTCTTGAGTACTATGGAGACTCCGTGAAGGGCCGATTCACCATCTCCAAAGATAATTCGAAGAATTCGGTCTATTTGCAAATGCACAGCCTGAGAGCTGACGACACGGCTGTATATTACTGTGCGAAACGGGGAGGCCCTTTCGAGTTACGCGACTACTACTACATGGACGTCTGGGGCAAAGGGACCACGGTCACCGTCTCCTCA	GACATCCAGATGACCCAGTCTCCTTCCACCCTGTCTGCATCTGTAGGGGACAGAGTCACCATCACTTGCCGGGCCAGTCAGAGTATTAGTAGTTGGTTGGCCTGGTACCAGCAGAAACCAGGGAAAGCCCCTAACCTCCTCATCTATCAGGCGTCTAAGTTAAAAAGCGGGGTCCCATCACGGTTCACCGGCAGTGGATCGGGGACAGAATTTACTCTCACCATCAGCAGCCTGCAGCCTGATGATTTTGCAACTTATTATTGCCAACAGTACAAGACTTACTCTCCCTGGGCGTTCGGCCAAGGGACCAAGGTGGAAATCAAA
37	IML3694	Acute	ADI-66226	IGHV3-30*18	IGHD3-3*01	IGHJ6*02	IGKV1-39*01	IGKJ2*01	0	0	NTD	No						GCGAAAGTCCAACAAAACACGGAGGGTTTTTGGAGTGGTTTCGCATACGATTACTACTACTACTACGGTATGGACGTC	AKVQQNTEGFWSGFAYDYYYYYGMDV	CAACAGAGTTACAGTACCCCCTTGGCT	QQSYSTPLA	CAGGTGCAGCTGGTGGAGTCTGGGGGAGGCGTGGTCCAGCCTGGGAGGTCCCTGAGACTCTCCTGTGCAGCCTCTGGATTCACCTTCAGTAGCTATGGCATGCACTGGGTCCGCCAGGCTCCAGGCAAGGGGCTGGAGTGGGTGGCAGTTATATCATATGATGGAAGTAATAAATACTATGCAGACTCCGTGAAGGGCCGATTCACCATCTCCAGAGACAATTCCAAGAACACGCTGTATCTGCAAATGAACAGCCTGAGAGCTGAGGACACGGCTGTGTATTACTGTGCGAAAGTCCAACAAAACACGGAGGGTTTTTGGAGTGGTTTCGCATACGATTACTACTACTACTACGGTATGGACGTCTGGGGGCAAGGGACCACGGTCACCGTCTCCTCA	GACATCCAGATGACCCAGTCTCCATCCTCCCTGTCTGCATCTGTAGGAGACAGAGTCACCATCACTTGCCGGGCAAGTCAGAGCATTAGCAGCTATTTAAATTGGTATCAGCAGAAACCAGGGAAAGCCCCTAAGCTCCTGATCTATGCTGCATCCAGTTTGCAAAGTGGGGTCCCATCAAGGTTCAGTGGCAGTGGATCTGGGACAGATTTCACTCTCACCATCAGCAGTCTGCAACCTGAAGATTTTGCAACTTACTACTGTCAACAGAGTTACAGTACCCCCTTGGCTTTTGGCCAGGGGACCAAGCTGGAGATCAAA
38	IML3694	Acute	ADI-66200	IGHV3-9*01	IGHD6-13*01	IGHJ4*02	IGLV2-14*01	IGLJ2*01	4.4	3	NTD	No						GCAAAGGGTGATAGCAGCAGCTGGTACTTTAATAGTTTTGACTTC	AKGDSSSWYFNSFDF	AGCTCATATACAACTAGCGGCACTCTTGTACTA	SSYTTSGTLVL	GAAGTGCAGCTGGTGGAGTCTGGGGGAGACTTGGTACAGCCTGGCAGGTCCCTGAGAGTCTCCTGTGCAGCCTCTGGATTCAGTTTTGATGATTATGGCATGCACTGGGTCCGGCAAGCTCCAGGGAAGGGCCTGGAGTGGGTCTCAGGTATTAGTTGGAATAGTGATAACATAGCCTATGCGGACTCTGTGAAGGGCCGATTCACCATCTCCAGAGACAACGCCAAGAATTCCCTGTATCTGCACATGGACAGTCTGAGAGCTGAGGACACGGCCCGGTATTACTGTGCAAAGGGTGATAGCAGCAGCTGGTACTTTAATAGTTTTGACTTCTGGGGCCAAGGAACCCTGGTCACCGTCTCCTCA	CAGTCTGCCCTGACTCAGCCTGCCTCCGTGTCTGGGTCTCCTGGACAGTCGATCACCATCTCCTGCACTGGAACCAGCAGTGACATTGGTGTTTATAACTATGTCTCCTGGTACCAACAGCACCCAGGCAAGGCCCCCAAACTCATGATTTATGATGTCAGTAATCGGCCCTCAGGGGTTTCTGATCGCTTCTCTGGCTCCAAGTCTGGCAACACGGCCTCCCTGACCATCTCTGGGCTCCAGGCTGAGGACGAGGCTGCTTATTACTGCAGCTCATATACAACTAGCGGCACTCTTGTACTATTCGGCGGAGGGACCAAGCTGACCGTCCTA
39	IML3694	Acute	ADI-66207	IGHV4-59*01	IGHD2-21*01	IGHJ1*01	IGKV3-20*01	IGKJ1*01	5.5	2.8	S2	No						GCGAGAGGCTTTGTGACG	ARGFVT	CTACAGTCTGGTAGCTCGTGGACG	LQSGSSWT	CAGGTGCAGCTGCAGGAGTCGGGCCCAGGGCTGGTGAAGCCTTCGGAGACCCTGTCCCTCACCTGCACTGTCTCTAGTGGCTCCCTCAGTGGTTACTACTGGAGCTGGTTCCGGCAGTCCCCAGGGAAGGGACTGGAGTGGATTGGATATATCTATTATAGTGGGCCCACCAAATACAACCCCTCCCTCAAGAGTCGAGTCACCATGTCAGTAGACACGTCCAAGAACCAGTTCTCCCTGAAGTTGATCTCTGTGACCGCTGCGGACACGGCCGTATATTATTGTGCGAGAGGCTTTGTGACGTGGGGCCAGGGCACCCTGGTCACCGTCTCCTCA	GAAATTGTGTTGACGCAGTCTCCAGGCACCCTGTCTTTGTCTCCAGGGGAAAGAGCCACCCTCTCCTGCAGGGCCAGTCAGAGTGTTAGCAGCAACTACTTAGCCTGGTTCCAGCAGAAACCTGGCCAGGCTCCCAGGCTCCTCATCTATGGTGCATCCAGCAGGGCCACTGGCATCCCCGACAGGTTCAGTGGCAGTGCGTCTGGGACAGACTTCACTCTCACCATCAGCAGACTGGAGCCTGAAGATTTTGCAGTATATTACTGTCTACAGTCTGGTAGCTCGTGGACGTTCGGCCAAGGGACCAAGGTGGAAATCAAA
40	IML3694	Acute	ADI-66227	IGHV2-70*01	IGHD1-26*01	IGHJ4*02	IGKV3-20*01	IGKJ5*01	5.4	5.2	Undefined	No						GCACGCAGTAGTGGGGCCTACTTCCACTTTGATTAC	ARSSGAYFHFDY	CAGCACTATGGTAGCGCACCTCCGATCTCC	QHYGSAPPIS	CAGGTCACCTTGAGGGAGTCTGGTCCTGCGCTGGTGAAACCCACACAGACCCTCACGCTGACCTGCTCCTTCTCTGGGTTCTCACTCAATACTAATGGAATGTGTGTGACTTGGATCCGTCAACCCCCAGGGAAGGCCCTGGAGTGGCTTGCACTCATTGATTGGGATGACGATAAATACTACAGCACAGATCTGAAGACCAGACTCACCATCTCCAAGGACACCTCCAAAAACCAGGTGGTCCTTACAATGACCAACATGCACCCTGTGGACACAGCCACATATTTTTGTGCACGCAGTAGTGGGGCCTACTTCCACTTTGATTACTGGGGCCAAGGAACCCTGGTCACCGTCTCCTCA	GAAATTGTGTTGACGCAGTCTCCAGGCACCCTGTCTTTGTCTCCAGGGGAGAGAGCCACCCTCTCCTGCAGGGCCAGTCAGAGTATTAGCGGCAACTACTTAGCCTGGTATCAGCAGAAAATTGGCCAGGCTCCCCGGCTCCTCATCTATGGTGCATCCAGCGTGGCCACTGGCATCCCCGACAGGTTCAGTGGCAGTGGGTCTGGGACAGACTTCACTCTCACCATCAGCAGACTGGAGCCCGAAGATTTTGCAGTGTATTATTGTCAGCACTATGGTAGCGCACCTCCGATCTCCTTCGGCCAAGGGACACGACTGGAGATTAAA
41	IML3694	Acute	ADI-66225	IGHV3-9*01	IGHD2-15*01	IGHJ4*02	IGLV3-21*03	IGLJ2*01	0	0	NTD	No						GCAAAAGGTCCAGATTGTAGTGGTGGTAGCTGCTACGGTTTCTACCTCTTTGACTAC	AKGPDCSGGSCYGFYLFDY	CAGGTGTGGGATAGTAGTAGTGATGTGGTA	QVWDSSSDVV	GAAGTGCAGCTGGTGGAGTCTGGGGGAGGCTTGGTACAGCCTGGCAGGTCCCTGAGACTCTCCTGTGCAGCCTCTGGATTCACCTTTGATGATTATGCCATGCACTGGGTCCGGCAAGCTCCAGGGAAGGGCCTGGAGTGGGTCTCAGGTATTAGTTGGAATAGTGGTAGCATAGGCTATGCGGACTCTGTGAAGGGCCGATTCACCATCTCCAGAGACAACGCCAAGAACTCCCTGTATCTGCAAATGAACAGTCTGAGAGCTGAGGACACGGCCTTGTATTACTGTGCAAAAGGTCCAGATTGTAGTGGTGGTAGCTGCTACGGTTTCTACCTCTTTGACTACTGGGGCCAAGGAACCCTGGTCACCGTCTCCTCA	TCCTATGTGCTGACTCAGCCACCCTCGGTGTCAGTGGCCCCAGGAAAGACGGCCAGGATTACCTGTGGGGGAAACAACATTGGAAGTAAAAGTGTGCACTGGTACCAGCAGAAGCCAGGCCAGGCCCCTGTGCTGGTCGTCTATGATGATAGCGACCGGCCCTCAGGGATCCCTGAGCGATTCTCTGGCTCCAACTCTGGGAACACGGCCACCCTGACCATCAGCAGGGTCGAAGCCGGGGATGAGGCCGACTATTACTGTCAGGTGTGGGATAGTAGTAGTGATGTGGTATTCGGCGGAGGGACCAAGCTGACCGTCCTA
42	IML3695	Acute	ADI-66195	IGHV3-13*01	IGHD2-2*01	IGHJ3*02	IGKV1-17*03	IGKJ2*01	5.5	2.8	Undefined	No						GCAAGAGGTCCCCATTGTAATAGTACCAGCTGCCCAATTGATGATGCTTTTGATCTC	ARGPHCNSTSCPIDDAFDL	CTACAGCATAATGGTTACCCCCGGACG	LQHNGYPRT	GAGGTGCAGCTGGTGGAGTCTGGGGGAGGCTTGGTACAGCCTGGGGGGTCCCTGAGACTCTCCTGTGCAGCCTCTGGATTTACCTTCAGTAGCTACGACATGCACTGGGTCCGTCAAGCTGCAGGAAAAGGTCTGGAGTGGGTCTCAACTATTGGTACTCAAGCTGACACATTCTATTCGGGCTCCGTGAAGGGCCGATTCACCATCTCCAGAGAGAATGCCAGAAACTCCTTCTATCTTCAACTGAACAGCCTGAGAGCCGGGGACACGGCTGTGTATTACTGTGCAAGAGGTCCCCATTGTAATAGTACCAGCTGCCCAATTGATGATGCTTTTGATCTCTGGGGCCAAGGGACAATGGTCACCGTCTCTTCA	GACATCCAGATGACCCAGTCTCCATCTGCCATGTCTGCATCTGTAGGAGACAGAGTCACCATCACTTGTCGGGCAAGTCAAGACATTAGCAATTATTTAGCCTGGTTTCAGCAGAAACCAGGGAAAGTCCCTAAGCGCCTGATCTATGGTGCATCCAGTTTGCAGAGTGGGGTCCCATCAAGGTTCAGCGGCAGTGGATCTGGGACAGAATTCACTCTCACTATCAGCAGCCTGCAGCCTGAAGATTTTGCGACTTATTACTGTCTACAGCATAATGGTTACCCCCGGACGTTTGGCCAGGGGACCAAGCTGGAGATCAAA
43	IML3695	Acute	ADI-62731	IGHV3-30*18	IGHD3-3*01	IGHJ4*02	IGLV2-11*01	IGLJ2*01	8.9	5.8	Undefined	Yes						GCGAAGAAAGGGGGGTTTTTCGAGTTTCGGAGTAGTAATTTTCCTGACTTC	AKKGGFFEFRSSNFPDF	TCATATGGAAGAAGTGACAGTGCTGTTGTA	SYGRSDSAVV	CAGGTGCAGCTGGTGGAGTCTGGGGGAGGCGTGGTCCAGCCTGGGAGGTCCCTGAGACTCTCCTGTGCAGCCAGTGGATTCGACTTCTCAAACCATGGCATGCACTGGGTCCGCCAGGCTCCAGGCAAGGGGCTGGAATGGGTGGCAGTTATCTCATATGAAGGAAGTAAGAAAAATTATGCAGACTCCGTGAAGGGCCGATTCACCGTCTCCAAGGACAGTTCCAGGAACACTCTGTATCTGGAAATGAATAGCCTCAGAGCTGAGGACTCGGCTGTCTATTACTGTGCGAAGAAAGGGGGGTTTTTCGAGTTTCGGAGTAGTAATTTTCCTGACTTCTGGGGCCAAGGAACCCTGGTCACCGTCTCCTCA	CAGTCTGCCCTGACTCAGCCTCGCTCAGTGTCCGGGTCTCCTGGACAGTCAGTCACCATCTCCTGCACTGGAACCAGCAGCGATGTTGGTGATCATAACTCTGTCTCCTGGTATCAACAACACCCAGGCAAAGCCCCCAAACTCCTGATTTCTGATGTCACTAAGCGGCCCTCAGGGGTCCCTGATCGCTTCTCTGGCTCCAAGTCTGGCAGCACGGCCTCCCTGACCATCTCTGGGCTCCGGGCTGAGGATGAGGCTGAGTATTACTGCTGCTCATATGGAAGAAGTGACAGTGCTGTTGTATTCGGCGGAGGGACCAAGCTGACCGTCCTA
44	IML3695	Acute	ADI-66197	IGHV3-53*02	IGHD5-18*01	IGHJ4*02	IGLV3-1*01	IGLJ2*01	6.2	3.2	S2	No						GCGAGAGGATTGGAGACAGCTATGGGTACCTATGACTAC	ARGLETAMGTYDY	CAGGCGTGGGACAGCGGCACTGTGGTT	QAWDSGTVV	GAGGTGCAGCTGGTGGAGACTGGAGGAGGCTTGATCCAGCCTGGGGGGTCCCTGAGACTTTCGTGTGCAGCCTCTGGGTTCAGTGTCAGTAGCAACTACATGAGTTGGGTCCGCCAGGTTCCAGGGAAGGGACTGGAGTGGGTCTCAGTTATTTATAGCACTGATGGCAGATACTATGCAGACTCCGTGAAGGGCCGATTCACCATCTCCAGAGACAATTCCAAGAACATAGTGTACCTTCAAATGAACAGCCTGAGAGCCGAGGACACGGCCGTGTATTATTGTGCGAGAGGATTGGAGACAGCTATGGGTACCTATGACTACTGGGGCCAAGGAACCCTGGTCACCGTCTCCTCA	TCCTATGAGCTGACTCAGCCACCCTCAGTGTCCGTGTCCCCAGGACAGACAGCCAGCATCACCTGCTCTGGAGATAAATTGGGCGATAAATATGCTTGCTGGTATCGACAGAAGCCAGGCCAGTCCCCTGTGTTGGTCATCTATCAAGATACCAAGCGGCCCTCAGGGATCCCTGAGCGATTCTCTGGCTCCAACTCTGGGAACACAGCCTCTCTGACCATCAGTGGGACCCAGGCTATGGATGAGGCTGACTATTTCTGTCAGGCGTGGGACAGCGGCACTGTGGTTTTCGGCGGAGGGACCAAGCTGACCGTCCTA
45	IML3695	Acute	ADI-62742	IGHV1-45*02	IGHD1-26*01	IGHJ6*02	IGLV2-14*03	IGLJ1*01	5.2	2.7	Undefined	Yes						GCGGTCAAAGGCGTGGGTTTTACAGGGGCAGACTACTACGCTATGGACGTC	AVKGVGFTGADYYAMDV	AGCTCATATACAACCAGCAGCACTCAGGTC	SSYTTSSTQV	CAGATGCAGCTGGTGCAGTCTGGGGCTGAGGTGAAGAAGACTGGGTCCTCAGTGAAAATTTCCTGCACGGCTTCCGGACACAGCTTCACCTACCGCTACCTGCACTGGGTGCGACAGGCCCCCGGACAAGCGCTTGAGTGGATGGGATGGATCACAAGTTTCAATGGTAACACCAACTACGCACAGAAATTCCAGGACAGAGTCACCATTACCGGGGACAGGTCAAAGAATACAGCCTACATGGAGCTGAGCAGCCTGAGATCTGAGGATACAGCCGTGTATTTCTGTGCGGTCAAAGGCGTGGGTTTTACAGGGGCAGACTACTACGCTATGGACGTCTGGGGGCAAGGGACCACGGTCACCGTCTCCTCA	CAGTCTGCCCTGACTCAGCCTGCCTCCGTGTCTGGGTCTCCTGGACAGTCGATCACCATCTCCTGCACTGGAAGCAACAGTGACATTGGTTTTTATAACTATGTCTCCTGGTACCAACAACACCCAGGCAAAGCCCCCAAACTCTTGATTTCTGATGTCAGTAATCGGCCCTCAGGGGTTTCTAATCGCTTCTCTGGCTCCAAGTCTGGCAACACGGCCTCCCTGACCATCTCTGGGCTCCAGGCTGAGGACGAGGCTGATTATTACTGCAGCTCATATACAACCAGCAGCACTCAGGTCTTCGGAACTGGGACCAAGGTCACCGTCCTA
46	IML3695	Acute	ADI-62748	IGHV5-51*01	IGHD2-8*01	IGHJ6*02	IGLV3-25*03	IGLJ2*01	5.1	3.8	NTD	No						GCGGGAAGTAATGATCCCACCTACGGTATGGACGTC	AGSNDPTYGMDV	CAATCATCAGACAGCAGTGATACTTATGTGCTA	QSSDSSDTYVL	GAGGTGCAGCTGGTGCAGTCTGGAGCAGAGGTGAAAAAGCCCGGGGAGTCTCTGAAGATCTCTTGTAAGGGCTTTGGAAACAGCTTTACCAATTACTGGATCGGCTGGGTGCGCCAGATGCCCGGGAAAGGCCTGGAGTGGATGGGGATCATCTATACTGGTGACTCTGATACCATATACAACCCGTCCTTCCAAGGCCAGGTCACCTTCTCAGCCGACAAGTCCATCAACACCGCCTACCTGCAGTGGAGCAGACTGAAGGCCTCGGACACCGCCATATATTATTGTGCGGGAAGTAATGATCCCACCTACGGTATGGACGTCTGGGGGCAAGGGACCACGGTCACCGTCTCCTCA	TCCTATGAGCTGACACAGCCACCCTCGGTGTCAGTGTCCCCAGGACAGACGGCCAGGATCACCTGCTCTGGAGATGCATTGCCAAAGCAATTTGCTTATTGGTACCAACAGAAGCCAGGCCAGGCCCCTGTAATGGTAATATATAGAGACAATGAGAGGCCCTCAGCGATCCCTGAGCGATTCTCTGGCTCCAGGTCAGGGACAACAGTCACGTTGACCATCAGTGGAGTCCAGGCAGAAGACGAGGCTGACTATTACTGTCAATCATCAGACAGCAGTGATACTTATGTGCTATTCGGCGGAGGGACCAAGCTGACCGTCCTA
47	IML3695	Acute	ADI-62689	IGHV1-69*01	IGHD2-2*01	IGHJ4*02	IGLV2-11*01	IGLJ3*02	6.1	2.7	RBD	No						GGGAGAGGAACCAACTATGCCCCTGACTAC	GRGTNYAPDY	TCATATGCAGGCAGCTACACCTTGGTG	SYAGSYTLV	CAGGTGCAGCTGGTGCAGTCTGGGGCTGAGGTGAAGAAGCCTGGGTCCTCGGTGAAGGTCTCCTGCAAGGCTTCTGGAGGCACCTTCAGCACCTTCGCTATCAGCTGGGTGCGACAGGCCCCTGGACAAGGGCTTGAGTGGATGGGAGGAATCATCCCTATATTTGGCACACCGAGGTACGCACAGAAGTTCCAGGGCAGAGTCACTATTACCGCGGACGAATCCTCGAGCACAGTCTACATGGAGGTGATCACCCTGAGATCTGAGGACACGGCCGTCTATTACTGTGGGAGAGGAACCAACTATGCCCCTGACTACTGGGGCCAAGGAACCCTGGTCACCGTCTCCTCA	CAGTCTGCCCTGACTCAGCCTCGCTCAGTGTCCGGGTCTCCTGGAAAGTCAGTCACCATCTCCTGCACTGGAACCAGCAGTGATGTTGGTGGTTATAACTTTGTCTCCTGGTACCAACACCACCCAGGCAAAGCCCCCAAACTCATTATTTCTGATGTCAATAAGCGGCCCTCAGGGGTCCCTGATCGCTTCTCTGGCTCCAAGTCTGGCAACACGGCCTCCCTGACCATCTCTGGGCTCCAGGCTGAGGATGAGGCTAATTATTACTGCTGCTCATATGCAGGCAGCTACACCTTGGTGTTCGGCGGAGGGACCAAGCTGACCGTCCTA
48	IML3695	Acute	ADI-66169	IGHV3-33*01	IGHD3-9*01	IGHJ4*02	IGKV1-5*04	IGKJ4*01	5.4	5.2	Undefined	Yes						GCGAAAGATAGAGGTAGAACATATTCCGGTATGTTGAGTGGTTATCTTGACTAC	AKDRGRTYSGMLSGYLDY	CAACAGTCTAAAATCATTTCTCGCCTCGCT	QQSKIISRLA	CAGGTGCAGCTGGTGGAGTCTGGGGGAGGCGTGGTCCAGCCTGGGAGGTCCCTGAGACTCTCCTGTGCAGCGTCTGGATTCACCTTCAGCACTTCTGGCATGCACTGGGTCCGCCAGGCTCCAGGCAAGGCGCTGGAGTGGGTGGCAATTATTTGGTATGATGGAGATAATCAATACTATGCAGACTCCGTGAAGGGCCGATTCACCATCTCCAGAGACAATTCCAAGAACACGCTATATCTCCAAATGAGCAGCCTGAGAGCCGAGGACACGGCTATCTATTACTGTGCGAAAGATAGAGGTAGAACATATTCCGGTATGTTGAGTGGTTATCTTGACTACTGGGGCCAAGGAACCCTGGTCACCGTCTCCTCA	GACATCCAGATGACCCAGTCTCCTTCCACCCTGTCTGCATCTGTAGGAGACAGAGTCACCATCACTTGCCGGGCCAGTCAGGATATTAGTACCTGGTTGGCTTGGTATCAGCAGAAACCAGGGAAAGCCCCTAAGCTCCTGATCTATAAGGCATCTACTTTAGAGACTGGGGTCCCATCAAGGTTCAACGGCAGTGGATCTGGGACAGAATTCACTCTCACCATCAACAGCCTGCAGCCTGATGATTTTGCAACTTATTACTGCCAACAGTCTAAAATCATTTCTCGCCTCGCTTTCGGCGGAGGGACCAAGGTGGAGATCAAA
49	IML3695	Acute	ADI-62690	IGHV1-2*02	IGHD1-1*01	IGHJ4*02	IGLV2-23*02	IGLJ3*02	0.7	1	RBD	No						GCGAGAGAGTCACACTGGAACCTACTCGAGGGCCTCTCTGACTAC	ARESHWNLLEGLSDY	TCATATGCAGGTAGTAGCACTTGGGTG	SYAGSSTWV	CAGGTGCAGCTGGTGCAGTCTGGGGCTGAGGTGAAGAAGCCTGGGGCCTCAGTGAAGGTCTCCTGCAAGGCTTCTGGATACACCTTCACCGGCTACTATATGCACTGGGTGCGACAGGCCCCTGGACAAGGGCTTGAGTGGATGGGGTGGATCAACCCTAACAGTGGTGGCACAAACTTTGCACAGAAGTTTCAGGGCAGGGTCACCATGACCAGGGACACGTCCATCAGCACAGCCTACATGGAGCTGAGCAGGCTGAGATCTGACGACACGGCCGTGTATTACTGTGCGAGAGAGTCACACTGGAACCTACTCGAGGGCCTCTCTGACTACTGGGGCCAAGGAACCCTGGTCACCGTCTCCTCA	CAGTCTGCCCTGACTCAGCCTGCCTCCGTGTCTGGGTCTCCTGGACAGTCGATCACCATCTCCTGCACTGGAACCAGCAGTGATGTTGGGAGTTATAACCTTGTCTCCTGGTACCAACATCACCCAGGCAAAGCCCCCAAACTCATGATTTATGAGGTCAGTAAGGGGCCCTCAGGGGTTTCTAATCGCTTCTCTGGCTCCAAGTCTGGCGACACGGCCTCCCTGACAATCTCTGGGCTCCAGGCTGAGGACGAGGCTGATTATTACTGCTGCTCATATGCAGGTAGTAGCACTTGGGTGTTCGGCGGAGGGACCAAGCTGACCGTCCTA
50	IML3695	Acute	ADI-66228	IGHV3-23*01	IGHD3-10*01	IGHJ6*02	IGLV1-44*01	IGLJ1*01	4.7	1	Undefined	No						GCGAAAGATCTCTGGGGAGGTAGTCCCTACTACAATATGGACGTC	AKDLWGGSPYYNMDV	GCAGCATGGGATGACAGCCTGAATGGCTTTTATGTC	AAWDDSLNGFYV	GAGGTGCAGCTGTTGGAGTCTGGGGGAGGCTTGGTACAGCCTGGGGGGTCCCTGAGACTCTCCTGTGTAGCCTCTGGATTCACCTTTAGCAGCTATGCCATGAACTGGGTCCGCCAGGCTCCAGGGAAGGGGCTAGAATGGGTCTCAGTTATTAGTGGTGGTGGTGGTGACAAATCCTACGCAGACTCCCTGAAGGGCCGGTTCACCATCTCCAGAGACAATTCCAAGAACACGCTGTTCCTGCAAATGAACAGCCTGAGAGTCGAGGACACGGCCGTATATTACTGTGCGAAAGATCTCTGGGGAGGTAGTCCCTACTACAATATGGACGTCTGGGGGCAAGGGACCACGGTCACCGTCTCCTCA	CAGTCTGTGCTGACTCAGCCACCCTCAGCGTCTGGGACCCCCGGGCAGAGGGTCACCATCTCTTGTTCTGGAAGCAGCTCCAACATCGGAAGTAATACTGTAAAGTGGTACCAGCAGCTCCCAGGAACGGCCCCCAAACTCCTCGTCTATAATAATAATCAGCGGCCCTCAGGGGTCCCTGACCGATTCTCTGGCTCCAAGTCTGGCACCTCAGCCTCCCTGGCCATCAGTGGGCTCCAGTCTGAGGATGAGGCTGATTATTACTGTGCAGCATGGGATGACAGCCTGAATGGCTTTTATGTCTTCGGAACTGGGACCAAGGTCACCGTCCTA
51	IML3695	Acute	ADI-66229	IGHV5-51*01	IGHD6-19*01	IGHJ4*02	IGKV3-20*01	IGKJ1*01	4.8	0.7	NTD	No						GTGACCACCGGCAGTGGCTGGTCCCACCTCTCCTACTTTGACTTC	VTTGSGWSHLSYFDF	CAGCAGTATGGTAGCTCACCTCAGACT	QQYGSSPQT	GAGGTGCAGCTGGTGCAGTCTGGAGCAGAGGTAAAAAAGCCCGGGGAGTCTCTGAACATCTCCTGTAAGGCTTCTGGATACATCTTTACCAGCTTCTGGATCGGCTGGGTGCGCCACATGCCCGGGAAAGGCCTGGAGTGGATGGCGTTCATCTATCCTGGTGACTCTGATATTAGATATAGCCCGTCCTTCCAAGGCCAGGTCACCATCTCAGCCGACAAGTCCATCACCACCGCCTACCTGCAGTGGAGCCGCCTGAAGGCCTCGGACACCGCCATGTATTACTGTGTGACCACCGGCAGTGGCTGGTCCCACCTCTCCTACTTTGACTTCTGGGGCCAAGGAACCCTGGTCACCGTCTCCTCA	GAAATTGTGTTGACGCAGTCTCCAGGCACCCTGTCTTTGTCTCCAGGGGAAAGAGCCACCCTCTCCTGCAGGGCCAGTCAGAGTGTCAGCAGCAGCTACTTAGCCTGGTACCAGCAGAAACCTGGCCAGGCTCCCAGGCTCCTCATCTATGGTGCATCCAGCAGGGCCACTGGCATCCCAGACAGGTTCAGTGGCAGTGGGTCTGGGACAGACTTCACTCTCACCATCAGCAGACTGGAGCCTGGAGATTTTGCAGTGTATTACTGTCAGCAGTATGGTAGCTCACCTCAGACTTTCGGCCAAGGGACCAAGGTGGAAATCAAA
52	IML3695	Acute	ADI-66196	IGHV4-31*03	IGHD6-13*01	IGHJ6*02	IGKV3-20*01	IGKJ2*01	0.7	0.3	S2	No						GCGAGAGTTTCGGTAGCAGCAGCTGGCGGTATGGACGTC	ARVSVAAAGGMDV	CAGCACTATGGTAGCTCACCCCTGTACACT	QHYGSSPLYT	CAGGTGCAGCTGCAGGAGTCGGGCCCAGGACTGGTGAAGCCTTCACAGACCCTGTCCCTCACCTGCACTGTCTCTGGTGGCTCCATCAGCAGTGGTGCTTACTACTGGAGCTGGATCCGCCAGCACCCAGGGAAGGGCCTGGAGTGGATTGGGTACATCTATTACAGTGGGAGCACCTACTACAACCCGTCCCTCAAGAGTCGAGTTACCATATCAGTAGACACGTCTAAGAACCAGTTCTCCCTGAAGCTGAACTCTGTGACTGCCGCGGACACGGCCGTGTATTACTGTGCGAGAGTTTCGGTAGCAGCAGCTGGCGGTATGGACGTCTGGGGGCAAGGGACCACGGTCACCGTCTCCTCA	GAAATTGTGTTGACGCAGTCTCCAGGCACCCTGTCTTTGTCTCCAGGGGAAAGAGCCACCCTCTCCTGCAGGGCCAGTCAGAGTGTTAGCAGCAGCTACTTAGCCTGGTACCAGCAGAAACCTGGCCAGGCTCCCAGGCTCCTCATCTATGGTGCATCCAGCAGGGCCACTGGCATCCCAGACAGGTTCAGTGGCAGTGGGTCTGGGACAGACTTCACTCTCACCATCAGCAGACTGGAGCCTGAAGATTTTGCAGTGTATTACTGTCAGCACTATGGTAGCTCACCCCTGTACACTTTTGGCCAGGGGACCAAGCTGGAGATCAAA
53	IML3695	Acute	ADI-67107	IGHV3-30-3*01	IGHD2-21*02	IGHJ6*02	IGLV2-11*01	IGLJ1*01	8.5	5.1	Undefined	No						GCGAGAGCATATGGTGGCAACTATTACTATGGTATGGGCGTC	ARAYGGNYYYGMGV	TCATATGCAGGCATCTACGCTTATGTC	SYAGIYAYV	CAGGTGCAGCTGGTGGAGTCTGGGGGAGGCGTGGTCCAGCCTGAGACGTCCCTGAGACTCTCCTGTGCAGCCTCTGGCTTCACCTTCTCTAACTATGCTATACACTGGGTCCGCCAGCCTCCAGGCAAGGGGCTGGAGTGGGTGTCACTTATATCATATGATGGAATCAATAAATACTACGCAGACTCCGTGAGGGGCCGATTCACCATCTCCAGAGACAATTCCAGGAACACGGTTTATATGCAGATGAGTAGCTTGAAAGTCGAGGACACGGCTATCTATTACTGTGCGAGAGCATATGGTGGCAACTATTACTATGGTATGGGCGTCTGGGGGCAAGGGACCACGGTCACCGTCTCCTCA	CAGTCTGCCCTGACTCAGCCTCGCTCAGTGTCCGGGTCTCCTGGACAGTCAGTCACCATCTCTTGCACTGGAACCAGCACTGATGTTGGTGCTTATAATTATGTCTCTTGGTACCAACAACACTCAGGCAAAGCCCCCAAACTCATAATTTATGATGTCGATAAACGGCCCTCAGGGGTCCTTGATCGCTTCTCTGGCTCCAAGTCTGGCAACACGGCCTCCCTGACCATCTCTGGGCTCCAGGCTGAGGATGAGGCCGATTATTACTGCTGCTCATATGCAGGCATCTACGCTTATGTCTTCGGAACTGGGACCAAGGTCACCGTCCTA
54	IML3695	Acute	ADI-67102	IGHV3-30*03	IGHD6-19*01	IGHJ4*02	IGLV2-14*03	IGLJ1*01	3.1	2.4	Undefined	Yes						GCGACCACGCTAATGGGCCAGCAGTGGCGGACTGACTAC	ATTLMGQQWRTDY	AGCTCATATACAACGAGCAGCACCCTCTATGTC	SSYTTSSTLYV	CAGGTGCAGCTGGTGGAGTCTGGGGGAGGCGTGGTCCAGCCTGGGAGGTCCCTGAGACTCTCCTGTGCAGCCTCTGGATTCACCTTCAGTAACTATGGCATGCACTGGGTCCGCCAGGCTCCAGGCAAGGGGCTGGAGTGGGTGGCAGTAATATCATACGATGGAAATAATAAATATTATGCAGACTCCGTGAAGGGCCGATTCACCATCTCCAGAGACAATTCCAAGAACACGCTGTATCTGCAAATGAACAGCCTGAGAGGTGCAGACACGGCCGTGTATTACTGTGCGACCACGCTAATGGGCCAGCAGTGGCGGACTGACTACTGGGGCCAAGGAACCCTGGTCACCGTCTCCTCA	CAGTCTGCCCTGACTCAGCCTGCCTCCGTGTCTGGGTCTCCTGGACAGTCGATCACCATCTCCTGCACTGGAGCCAGCAGTGACGTTGGTGGTTATAACTCTGTCTCCTGGTACCAACAACACCCAGGCAAAGCCCCCAAACTCATGATTTATGATGTCAGTATTCGGCCCTCAGGGGTTTCTAGTCGCTTCTCTGGCTCCAAGTCTGGCAACACGGCCTCCCTGACCATCTCTGGGCTCCAGGCTGAGGACGAGGCTGATTATTACTGCAGCTCATATACAACGAGCAGCACCCTCTATGTCTTCGGAACTGGGACCAAGGTCACCGTCCTA
55	IML3695	Acute	ADI-67101	IGHV3-33*01	IGHD3-9*01	IGHJ4*02	IGKV1-5*04	IGKJ4*01	5.4	5.2	S2	Yes						GCGAAAGATAGAGGTAGAACATATTCCGGTATGTTGAGTGGTTATCTTGACTAC	AKDRGRTYSGMLSGYLDY	CAACAGTCTAAAATCATTTCTCGCCTCGCT	QQSKIISRLA	CAGGTGCAGCTGGTGGAGTCTGGGGGAGGCGTGGTCCAGCCTGGGAGGTCCCTGAGACTCTCCTGTGCAGCGTCTGGATTCACCTTCAGCACTTCTGGCATGCACTGGGTCCGCCAGGCTCCAGGCAAGGCGCTGGAGTGGGTGGCAATTATTTGGTATGATGGAGATAATCAATACTATGCAGACTCCGTGAAGGGCCGATTCACCATCTCCAGAGACAATTCCAAGAACACGCTATATCTCCAAATGAGCAGCCTGAGAGCCGAGGACACGGCTATCTATTACTGTGCGAAAGATAGAGGTAGAACATATTCCGGTATGTTGAGTGGTTATCTTGACTACTGGGGCCAAGGAACCCTGGTCACCGTCTCCTCA	GACATCCAGATGACCCAGTCTCCTTCCACCCTGTCTGCATCTGTAGGAGACAGAGTCACCATCACTTGCCGGGCCAGTCAGGATATTAGTACCTGGTTGGCTTGGTATCAGCAGAAACCAGGGAAAGCCCCTAAGCTCCTGATCTATAAGGCATCTACTTTAGAGACTGGGGTCCCATCAAGGTTCAACGGCAGTGGATCTGGGACAGAATTCACTCTCACCATCAACAGCCTGCAGCCTGATGATTTTGCAACTTATTACTGCCAACAGTCTAAAATCATTTCTCGCCTCGCTTTCGGCGGAGGGACCAAGGTGGAGATCAAA
56	IML3695	Acute	ADI-67109	IGHV4-30-4*01_S8853	IGHD3-22*01	IGHJ4*02	IGKV1-39*01	IGKJ4*01	0	0	Undefined	No						GCCAGAGGTAGTCTTGATAGTAGTGGTTACAGCCCCCAGCCGGGGGACTTTGACTAC	ARGSLDSSGYSPQPGDFDY	CAACAGAGTTACAGTACCCCGCTCACT	QQSYSTPLT	CAGGTGCAGCTGCAGGAGTCGGGCCCAGGACTGGTGAAGCCTTCACAGACCCTGTCCCTCACCTGCACTGTCTCTGGTGGCTCCATCAGCAGTGGTGATTACTACTGGAGTTGGATCCGCCAGCACCCAGGGAAGGGCCTGGAGTGGATTGGGTACATCTATTACAGTGGGAGCACCTACTACAACCCGTCCCTCAAGAGTCGAGTTACCATATCAGTAGACACGTCCAAGAACCAGTTCTCCCTGAAGCTGAGCTCTGTGACTGCCGCAGACACGGCCGTGTATTACTGTGCCAGAGGTAGTCTTGATAGTAGTGGTTACAGCCCCCAGCCGGGGGACTTTGACTACTGGGGCCAAGGAACCCTGGTCACCGTCTCCTCA	GACATCCAGATGACCCAGTCTCCATCCTCCCTGTCTGCATCTGTAGGAGACAGAGTCACCATCACTTGCCGGGCAAGTCAGAGCATTAGCAGCTATTTAAATTGGTATCAGCAGAAACCAGGGAAAGCCCCTAAGCTCCTGATCTATGCTGCATCCAGTTTGCAAAGTGGGGTCCCATCAAGGTTCAGTGGCAGTGGATCTGGGACAGATTTCACTCTCACCATCAGCAGTCTGCAACCTGAAGATTTTGCAACTTACTACTGTCAACAGAGTTACAGTACCCCGCTCACTTTCGGCGGAGGGACCAAGGTGGAGATCAAA
57	IML3695	Acute	ADI-67106	IGHV3-21*01	IGHD5-12*01	IGHJ4*02	IGKV1-33*01	IGKJ1*01	0	0	NTD	No						GCGAGCCCCCGGGGTAGATGGCTACAATTGGGCTCCTTTGACTAC	ASPRGRWLQLGSFDY	CAACAGTATGATAATCTCCCGTACACT	QQYDNLPYT	GAGGTGCAGCTGGTGGAGTCTGGGGGAGGCCTGGTCAAGCCTGGGGGGTCCCTGAGACTCTCCTGTGCAGCCTCTGGATTCACCTTCAGTAGCTATAGCATGAACTGGGTCCGCCAGGCTCCAGGGAAGGGGCTGGAGTGGGTCTCATCCATTAGTAGTAGTAGTAGTTACATATACTACGCAGACTCAGTGAAGGGCCGATTCACCATCTCCAGAGACAACGCCAAGAACTCACTGTATCTGCAAATGAACAGCCTGAGAGCCGAGGACACGGCTGTGTATTACTGTGCGAGCCCCCGGGGTAGATGGCTACAATTGGGCTCCTTTGACTACTGGGGCCAAGGAACCCTGGTCACCGTCTCCTCA	GACATCCAGATGACCCAGTCTCCATCCTCCCTGTCTGCATCTGTAGGAGACAGAGTCACCATCACTTGCCAGGCGAGTCAGGACATTAGCAACTATTTAAATTGGTATCAGCAGAAACCAGGGAAAGCCCCTAAGCTCCTGATCTACGATGCATCCAATTTGGAAACAGGGGTCCCATCAAGGTTCAGTGGAAGTGGATCTGGGACAGATTTTACTTTCACCATCAGCAGCCTGCAGCCTGAAGATATTGCAACATATTACTGTCAACAGTATGATAATCTCCCGTACACTTTCGGCCAAGGGACCAAGGTGGAAATCAAA
58	IML3695	Acute	ADI-67108	IGHV3-33*01	IGHD3-16*02	IGHJ3*02	IGLV3-25*03	IGLJ1*01	0	0	Undefined	No						GCGAGAGAGGGGGAGGCCCTGGCAGGAAATGCTTTTGATATC	AREGEALAGNAFDI	CAATCAGCAGACAGCAGTGGTACTTATAGGAATGTC	QSADSSGTYRNV	CAGGTGCAGCTGGTGGAGTCTGGGGGAGGCGTGGTCCAGCCTGGGAGGTCCCTGAGACTCTCCTGTGCAGCGTCTGGATTCACCTTCAGTAGCTATGGCATGCACTGGGTCCGCCAGGCTCCAGGCAAGGGGCTGGAGTGGGTGGCAGTTATATGGTATGATGGAAGTAATAAATACTATGCAGACTCCGTGAAGGGCCGATTCACCATCTCCAGAGACAATTCCAAGAACACGCTGTATCTGCAAATGAACAGCCTGAGAGCCGAGGACACGGCTGTGTATTACTGTGCGAGAGAGGGGGAGGCCCTGGCAGGAAATGCTTTTGATATCTGGGGCCAAGGGACAATGGTCACCGTCTCTTCA	TCCTATGAGCTGACACAGCCACCCTCGGTGTCAGTGTCCCCAGGACAGACGGCCAGGATCACCTGCTCTGGAGATGCATTGCCAAAGCAATATGCTTATTGGTACCAGCAGAAGCCAGGCCAGGCCCCTGTGCTGGTGATATATAAAGACAGTGAGAGGCCCTCAGGGATCCCTGAGCGATTCTCTGGCTCCAGCTCAGGGACAACAGTCACGTTGACCATCAGTGGAGTCCAGGCAGAAGACGAGGCTGACTATTACTGTCAATCAGCAGACAGCAGTGGTACTTATAGGAATGTCTTCGGAACTGGGACCAAGGTCACCGTCCTA
59	IML3695	Acute	ADI-67111	IGHV1-8*01	IGHD4-17*01	IGHJ3*02	IGKV4-1*01	IGKJ2*01	4.1	0.7	NTD	No						GCGAGAGGCCTCTCGGACTACGGTGACGACTCTTTCCCTGTGGCGAAAATC	ARGLSDYGDDSFPVAKI	CAGCAATATTATAGTACTCCTCGTACT	QQYYSTPRT	CAGGTGCAGCTGGTGCAGTCTGGGGCTGAGGTGAAGAAGCCTGGGGCCTCAGTGAAGGTCTCCTGCAAGGCTTCTGGCTATACCTTCACCAGTTATGATGTCAACTGGGTGCGACAGGCCACTGGACAAGGGCTTGAGTGGATGGGGTGGATGACTCCTAGCAGTGGTGACACAGGCTATGCACAGAAGTTCCAGGGCAGAGTCACCATGACCAGGGACACCTCCATAAACACAGCCTACATGGAGCTGAGTAGCCTGAGATCTGAGGACACGGCCGTGTATTATTGTGCGAGAGGCCTCTCGGACTACGGTGACGACTCTTTCCCTGTGGCGAAAATCTGGGGCCAAGGGACAATGGTCACCGTCTCTTCA	GACATCGTGATGACCCAGTCTCCAGACTCCCTGGCTGTGTCTCTGGGCGAGAGGGCCACCATCAACTGCAAGTCCAGCCAGAGTGTTTTATACAGCTCCAACAATAAGAACTACTTAGCTTGGTACCAGCAGAAACCAGGACAGCCTCCTAACCTGCTCATTTACTGGGCATCTACCCGGGAATCTGGGGTCCCTGACCGATTCAGTGGCAGCGGGTCTGGGACAGATTTCACTCTCACCATCAGCAGCCTGCAGGCTGAAGATGTGGCAGTTTATTACTGTCAGCAATATTATAGTACTCCTCGTACTTTTGGCCAGGGGACCAAGCTGGAGATCAAA
60	IML3695	Acute	ADI-67115	IGHV3-30-3*01	IGHD6-19*01	IGHJ5*02	IGLV3-25*01	IGLJ3*02	0	0.4	Undefined	No						GCGAGAGATCGCCCCTCAAGCAGTGGCTGGTACTCGGGATTCGACCCC	ARDRPSSSGWYSGFDP	CAATCAGCAGACAGCAGTGGTACCCCCAATTGGGTG	QSADSSGTPNWV	CAGGTGCAGCTGGTGGAGTCTGGGGGAGGCGTGGTCCAGCCTGGGAGGTCCCTGAGACTCTCCTGTGCAGCCTCTGGATTCACCTTCAGTAGCTATGCTATGCACTGGGTCCGCCAGGCTCCAGGCAAGGGGCTGGAGTGGGTGGCAGTTATATCATATGATGGAAGCAATAAATACTACGCAGACTCCGTGAAGGGCCGATTCACCATCTCCAGAGACAATTCCAAGAACACGCTGTATCTGCAAATGAACAGCCTGAGAGCTGAGGACACGGCTGTGTATTACTGTGCGAGAGATCGCCCCTCAAGCAGTGGCTGGTACTCGGGATTCGACCCCTGGGGCCAGGGAACCCTGGTCACCGTCTCCTCA	TCCTATGAGCTGATGCAGCCACCCTCGGTGTCAGTGTCCCCAGGACAGACGGCCAGGATCACCTGCTCTGGAGATGCATTGCCAAAGCAATATGCTTATTGGTACCAGCAGAAGCCAGGCCAGGCCCCTGTGCTGGTGATATATAAAGACAGTGAGAGGCCCTCAGGGATCCCTGAGCGATTCTCTGGCTCCAGCTCAGGGACAACAGTCACGTTGACCATCAGTGGAGTCCAGGCAGAAGACGAGGCTGACTATTACTGTCAATCAGCAGACAGCAGTGGTACCCCCAATTGGGTGTTCGGCGGAGGGACCAAGCTGACCGTCCTA
61	IML3695	Acute	ADI-67112	IGHV3-33*01	IGHD4-17*01	IGHJ6*02	IGLV3-25*03	IGLJ3*02	0	0.3	Undefined	No						GCGAGAGAAGACATGACTACTGAGACTGGCGGTATGGACGTC	AREDMTTETGGMDV	CAATCAGCAGACAGCAGTGGTACTTATCGAATG	QSADSSGTYRM	CAGGTGCAGCTGGTGGAGTCTGGGGGAGGCGTGGTCCAGCCTGGGAGGTCCCTGAGACTCTCCTGTGCAGCGTCTGGATTCACCTTCAGTAGCTATGGCATGCACTGGGTCCGCCAGGCTCCAGGCAAGGGGCTGGAGTGGGTGGCAGTTATATGGTATGATGGAAGTAATAAATACTATGCAGACTCCGTGAAGGGCCGATTCACCATCTCCAGAGACAATTCCAAGAACACGCTGTATCTGCAAATGAACAGCCTGAGAGCCGAGGACACGGCTGTGTATTACTGTGCGAGAGAAGACATGACTACTGAGACTGGCGGTATGGACGTCTGGGGGCAAGGGACCACGGTCACCGTCTCCTCA	TCCTATGAGCTGACACAGCCACCCTCGGTGTCAGTGTCCCCAGGACAGACGGCCAGGATCACCTGCTCTGGAGATGCATTGCCAAAGCAATATGCTTATTGGTACCAGCAGAAGCCAGGCCAGGCCCCTGTGCTGGTGATATATAAAGACAGTGAGAGGCCCTCAGGGATCCCTGAGCGATTCTCTGGCTCCAGCTCAGGGACAACAGTCACGTTGACCATCAGTGGAGTCCAGGCAGAAAACGAGGCTGACTATTACTGTCAATCAGCAGACAGCAGTGGTACTTATCGAATGTTCGGCGGAGGGACCAAGCTGACCGTCCTA
62	IML3695	Acute	ADI-67113	IGHV3-30-3*01	IGHD3-9*01	IGHJ6*02	IGLV8-61*01	IGLJ1*01	0	17	Undefined	No						GCGAGAGATGGCCTCTCTTACGATATTTTGACTGGTTATCTATTCCCGCCCGATTACTACTACTACTACGGTATGGACGTC	ARDGLSYDILTGYLFPPDYYYYYGMDV	GTGCGGTATAGGGGAAGGGGCATTGGGGTG	VRYRGRGIGV	CAGGTGCAGCTGGTGGAGTCTGGGGGAGGCGTGGTCCAGCCTGGGAGGTCCCTGAGACTCTCCTGTGCAGCCTCTGGATTCACCTTCAGTAGCTATGCTATGCACTGGGTCCGCCAGGCTCCAGGCAAGGGGCTGGAGTGGGTGGCAGTTATATCATATGATGGAAGCAATAAATACTACGCAGACTCCGTGAAGGGCCGATTCACCATCTCCAGAGACAATTCCAAGAACACGCTGTATCTGCAAATGAACAGCCTGAGAGCTGAGGACACGGCTGTGTATTACTGTGCGAGAGATGGCCTCTCTTACGATATTTTGACTGGTTATCTATTCCCGCCCGATTACTACTACTACTACGGTATGGACGTCTGGGGGCAAGGGACCACGGTCACCGTCTCC…	CAGACTGTGGTGACCCAGGAGCCTTGGTTTTCAGGGTCCCTGGGAGGGCCATTCACATTAACTTGTGGCTTAAGTTCGGGTTCAGTTTTAATTGGTTATTACCCCAGTTGGAACCAGCAGACCCCAGGCCAGGTTCCAGGCAGGTTCATTTACAGCACAAACACTGGTTTTTTTGGGGCCCTTAATGGTTTTTCGGGTTCCACCCTTGGGAACAAAGTTGCCTTCACCATCACGGGGGCCCAGGCAGATGATAATTTTAATTATTACTGTGTGCGGTATAGGGGAAGGGGCATTGGGGTGTTCGGAACTGGGACCAAGGTCACCGTCCTA
63	IML3695	Acute	ADI-67114	IGHV3-30-3*01	IGHD2-15*01	IGHJ3*02	IGLV3-1*01	IGLJ2*01	0	0.7	NTD	No						GCGAGACATTCGGAGGTTTGTACTGGTGGTAGCTGCTACGAGTGGACTGCTTTTGATATC	ARHSEVCTGGSCYEWTAFDI	CAGGCGTGGGACAGCAGTAATGTGGTA	QAWDSSNVV	CAGGTGCAGCTGGTGGAGTCTGGGGGAGGCGTGGTCCAGCCTGGGAGGTCCCTGAGACTCTCCTGTGCAGCCTCTGGATTCACCTTCAGTAGCTATGCTATGCACTGGGTCCGCCAGGCTCCAGGCAAGGGGCTGGAGTGGGTGGCAGTTATATCATATGATGGAAGCAATAAATACTACGCAGACTCCGTGAAGGGCCGATTCACCATCTCCAGAGACAATTCCAAGAACACGCTGTATCTGCAAATGAACAGCCTGAGAGCTGAGGACACGGCTGTGTATTACTGTGCGAGACATTCGGAGGTTTGTACTGGTGGTAGCTGCTACGAGTGGACTGCTTTTGATATCTGGGGCCAAGGGACAATGGTCACCGTCTCTTCA	TCCTATGAGCTGACTCAGCCACCCTCAGTGTCCGTGTCCCCAGGACAGACAGCCAGCATCACCTGCTCTGGAGATAAATTGGGGGATAAATATGCTTGCTGGTATCAGCAGAAGCCAGGCCAGTCCCCTGTGCTGGTCATCTATCAAGATAGCAAGCGGCCCTCAGGGATCCCTGAGCGATTCTCTGGCTCCAACTCTGGGAACACAGCCACTCTGACCATCAGCGGGACCCAGGCTATGGATGAGGCTGACTATTACTGTCAGGCGTGGGACAGCAGTAATGTGGTATTCGGCGGAGGGACCAAGCTGACCGTCCTA
64	IML3695	Acute	ADI-67103	IGHV3-33*01	IGHD3-9*01	IGHJ4*02	IGKV1-5*04	IGKJ4*01	5.4	5.2	S2	Yes						GCGAAAGATAGAGGTAGAACATATTCCGGTATGTTGAGTGGTTATCTTGACTAC	AKDRGRTYSGMLSGYLDY	CAACAGTCTAAAATCATTTCTCGCCTCGCT	QQSKIISRLA	CAGGTGCAGCTGGTGGAGTCTGGGGGAGGCGTGGTCCAGCCTGGGAGGTCCCTGAGACTCTCCTGTGCAGCGTCTGGATTCACCTTCAGCACTTCTGGCATGCACTGGGTCCGCCAGGCTCCAGGCAAGGCGCTGGAGTGGGTGGCAATTATTTGGTATGATGGAGATAATCAATACTATGCAGACTCCGTGAAGGGCCGATTCACCATCTCCAGAGACAATTCCAAGAACACGCTATATCTCCAAATGAGCAGCCTGAGAGCCGAGGACACGGCTATCTATTACTGTGCGAAAGATAGAGGTAGAACATATTCCGGTATGTTGAGTGGTTATCTTGACTACTGGGGCCAAGGAACCCTGGTCACCGTCTCCTCA	GACATCCAGATGACCCAGTCTCCTTCCACCCTGTCTGCATCTGTAGGAGACAGAGTCACCATCACTTGCCGGGCCAGTCAGGATATTAGTACCTGGTTGGCTTGGTATCAGCAGAAACCAGGGAAAGCCCCTAAGCTCCTGATCTATAAGGCATCTACTTTAGAGACTGGGGTCCCATCAAGGTTCAACGGCAGTGGATCTGGGACAGAATTCACTCTCACCATCAACAGCCTGCAGCCTGATGATTTTGCAACTTATTACTGCCAACAGTCTAAAATCATTTCTCGCCTCGCTTTCGGCGGAGGGACCAAGGTGGAGATCAAA
65	IML3695	Acute	ADI-67116	IGHV3-9*01	IGHD6-19*01	IGHJ5*02	IGLV2-23*02	IGLJ1*01	5.1	2.1	Undefined	No						GCAAAAGATCGATATGCCAGTGGCTGGTTCCACTGGTTCGACCCC	AKDRYASGWFHWFDP	TCATATGCAGGAAACAACGTTATGGTC	SYAGNNVMV	GAAGTGCAGCTGGTGGAGTCTGGGGGAGGCTTGGTAAAGCCTGGCAGGTCCCTGAGACTCTCCTGTGCAGCCTCTGGATTCACCTTTGATGATTATGCCATGCACTGGGTCCGGCAAGTTCCAGGGAAGGGCCTGGAGTGGGTCTCAGGTATTGATTGGAATAGTGTTACTATAGGCTATGCGGACTCTGTGAAGGGCCGATTCACCATCTCCAGAGACAATGTCAAGAGCTCCTTGTTTCTGCAAATGAACAGTCTGAGAGTTGAGGACACGGCCATCTATTACTGTGCAAAAGATCGATATGCCAGTGGCTGGTTCCACTGGTTCGACCCCTGGGGCCAGGGAACCCTGGTCACCGTCTCCTCA	CAGTCTGCCCTGACTCAGCCTGCCTCCGTGTCTGGGTCTCCTGGACAGTCGATCACCATCTCCTGCACTGGAACCAGCAGTGATGTTGGGGGTTATAACCTTGTCTCCTGGTACCAACAGCACCCAGGCAAAGCCCCCAAACTCATAATTTATGACGTCACTAAGCGGCCCTCAGGGGTTTCTAGTCGCTTCTCTGCCTCCAAGTCTGGCAACACGGCCTCCCTGACAATCTCTGGGCTCCAGGCTGAGGACGAGGCTGATTATTACTGCTGCTCATATGCAGGAAACAACGTTATGGTCTTCGGAACTGGGACCAAGGTCACCGTCCTA
66	IML3694	Pre-vax	ADI-67626	IGHV3-30*18	IGHD2-2*01	IGHJ4*02	IGLV2-8*01	IGLJ2*01	3.7	1.4	S2	No						GCGAAAGGTCCCGATGTGGGGGTTATATTAGTACCAGCCTCTCTTGACGAC	AKGPDVGVILVPASLDD	AGCTCATATGCACGCAGCAACAATTTGGTA	SSYARSNNLV	CAGGTGCAGCTGGTGGAGTCTGGGGGAGGCGTGGTCCAGCCTGGGAAGTCCCTGAGACTCTCCTGTGCCGCCTCTGGATTCACCTTCAGTATTTATGGCATGCACTGGGTCCGCCAGGCTCCAGGCAAGGGGCTGGAGTGGGTGGCGGCTATATCATATGATGGAAGTAATAAATACTATGCAGACTCCGTGAAGGGCCGATTCTCCATCTCCAGAGACAATTCCAAGAACACGCTGTATTTGCAAATGAACAGCCTGAGAGCTGACGATACGGCTGTCTATTACTGTGCGAAAGGTCCCGATGTGGGGGTTATATTAGTACCAGCCTCTCTTGACGACTGGGGCCAAGGAACCCTGGTCACCGTCTCCTCA	CAGTCTGCCCTGACTCAGCCTCCCTCCGCGTCCGGGTCTCCTGGACAGTCAGTCACCATCTCCTGCACTGGAACCAGCAGTGACGTTGGTGGTTATGACTATGTCTCCTGGTACCAACAGCACCCAGGCAAAGCCCCCAAACTCATGATTTATGAAGTCACTAAGCGGCCCTCAGGGGTCCCTGATCGCTTCTCTGGCTCCAAGTCTGGCAACACGGCCTCCCTGACCGTCTCTGGGCTCCAGGCTGAGGATGAGGCTGATTATTACTGCAGCTCATATGCACGCAGCAACAATTTGGTATTCGGCGGAGGGACCAAGCTGACCGTCCTA
67	IML3694	Pre-vax	ADI-67628	IGHV3-33*01	IGHD2-8*01	IGHJ6*02	IGKV2-30*01	IGKJ1*01	4.1	1.7	RBD	No			>1.0	>1.0		GCGAGAGATACCGAGATTACTAATTTCGATATGGACGTC	ARDTEITNFDMDV	ATGCAAGGTACACACTGGCCTCCCACG	MQGTHWPPT	CAGGTGCAGCTGGTGGAGTCTGGGGGAGGCGTGGTCCAGCCTGGGAGGTCCCTGAGACTCTCCTGTGGAGCGTCTGGATTCACCTTCGGTTCCTATAACATGCACTGGGTCCGCCAGGCTCCAGGCAAGGGGCTGGAGTGGGTGGCAGTTATATGGCATGATGGAAGTAATAAATACTATGCAGACTCCGTGAAGGGCCGATTCACCATCTCCAGAGACAATTCCAAGAGCACGCTGTATCTGCAAATGAACAGCCTGAGCCCCGAGGACACGTCTGTGTATTATTGTGCGAGAGATACCGAGATTACTAATTTCGATATGGACGTCTGGGGGCAAGGGACCACGGTCACCGTCTCCTCA	GATGTTGTGATGACTCAGTCTCCACTCTCCCTGCCCGTCACCCTTGGACAGCCGGCCTCCATCTCCTGCAGGTCTAGTCAAAGCCTCGTATACATTGATGGAAATACCTACTTGAATTGGTTTCTCCAGAGGCCAGGCCAATCTCCAAGGCGCCTAATTTATAAGGTTTCTAACCGGGACTCTGGGGTCCCAGACAGATTCAGCGGCAGTGGGTCAGGCACTGATTTCACACTGAAAATCAGCAGGGTGGAGGCTGAGGATGTTGGGCTTTATTACTGCATGCAAGGTACACACTGGCCTCCCACGTTCGGCCAAGGGACCAAGGTGGAAATCAAA
68	IML3694	Pre-vax	ADI-67630	IGHV1-24*01	IGHD2-2*01	IGHJ5*02	IGKV1-39*01	IGKJ1*01	2.7	4.6	NTD	No		>1.0				GCAACAGTTCCACCCCCCATTGTAGAAATACCAGTTCCTCAGAGAAATTGGTTCGCCCCC	ATVPPPIVEIPVPQRNWFAP	CAACAGAGTTACACTACCCCGTACACT	QQSYTTPYT	CAGGTCCAGCTGGTACAGTCTGGGGCTGAGGTGAGGAAGCCTGGGGCCTCAGTGAAGGTCTCCTGCAAGGTTTCCGAATACACCCTCATTGAGTTATCCGTGCACTGGGTGCGGCAGGCTCCTGGAAAAGGGCTTGAGTGGATGGGAGGTTTTGATCCTGAAGATGGTAAAACAATCTACGCACAGAAGTTCCAGGGCAGAGTCACCATGACCGAGGACACATCTACAGACACAGCCTACATGGAGCTGAGCAGCCTGAGATCTGAGGACACGGCCGTATATTACTGTGCAACAGTTCCACCCCCCATTGTAGAAATACCAGTTCCTCAGAGAAATTGGTTCGCCCCCTGGGGCCAGGGAACCCTGGTCACCGTCTCCTCA	GACATCCAGATGACCCAGTCTCCATCCTCCCTGCCTGCATCTGTAGGAGACAGAGTCACCATCACTTGCCGGGCAAGTCAGAGCATTAGCAGCTATTTGAATTGGTATCAGCAGAAGTCAGGGAAAGCCCCTAAGCTCCTGATCTATTCTGCTTCCACTTTGCAAAGTTCGGTCCCATCAAGGTTCAGTGGCAGTGGATCTGGGACAGATTTCAGTCTCACCATCAGTAGTCTGCACCCTGAAGATTTTGCAACTTACTACTGTCAACAGAGTTACACTACCCCGTACACTTTCGGCCAAGGGACCAAGGTGGAAATCAAA
69	IML3694	Pre-vax	ADI-67632	IGHV3-9*01	IGHD3-3*01	IGHJ2*01	IGKV2D-29*01	IGKJ3*01	3	1.3	NTD	No						GCAAAAGATCACAGGATGAGATACGATTTTTGGAGTGGTTTCCCTGACTTC	AKDHRMRYDFWSGFPDF	ATGCAAAGTTTAAAGCTTCCCTTATTCACC	MQSLKLPLFT	GAAGTGCAGCTGGTGGAGTCTGGGGGAGGCTTGGTACAGCCTGCCAGGTCCCTGAGACTCTCCTGTGCAGCCTCTGGATTCACCTTTGATGATTATGCCATGCACTGGGTCCGGCAAGCTCCAGGGAAGGGCCTGGAGTGGATCTCAGGTATTAGTTGGAATAGTAATAACAAAGGCTATGCGCACTCTGTGAAGGGCCGATTCACCATCTCCAGAGACAACGCCAAGAACTCCCTGTATCTGGAAATGAACAGTCTGAGAGCTGAGGACACGGCCTTCTATTACTGTGCAAAAGATCACAGGATGAGATACGATTTTTGGAGTGGTTTCCCTGACTTCTGGGGCCGTGGCACCCTGGTCACTGTCTCCTCA	GATATTGTGATGACCCAGACTCCACTCTCTCTGTCCGTCACCCCTGGACAGCCGGCCTCCCTCTCCTGCAAGTCTAGTCAGAGCCTCCTGCATAGTGATGGAAAGACCTATTTGTATTGGTACCTGCAGAAGCCAGGCCAGCCTCCACAGCTCCTGATCTATGACGTTTCCAACCGGTTCTCTGGAGTGCCAGATAGGTTCAGTGGCAGCGGGTCAGGGACAGATTTCACACTGAAAATCAGCCGGGTGGAGGCTGAGGATGTTGGGGTTTATTACTGCATGCAAAGTTTAAAGCTTCCCTTATTCACCTTCGGCCCTGGGACCAAAGTGGATATCAAA
70	IML3694	Pre-vax	ADI-67635	IGHV4-34*01	IGHD4-4*01	IGHJ6*02	IGKV1-17*01	IGKJ1*01	3.4	0.7	Undefined	No						GCGAGAGGCAATGCAGTAAGTACGTTCTTTTACTACGACTACCACGGAATGGACGTC	ARGNAVSTFFYYDYHGMDV	CTACAACATAATAGTTACCCGTGGACG	LQHNSYPWT	CAGGTGCAGCTACAACAGTGGGGCGCAGGACTATTGAAGGCTTCGGAGACCCTGTCCCTCACCTGCGCTGTCTATGGTGGGTCCTTCAGTAATTATCACTGGAGCTGGATTCGCCAGCCCCCAGGGAAGGGGCTGGAGTGGATTGGGGAAATCAATCATAGTGGAAGCACCAACTACAACCCGTCCCTCAAGAGTCGAATCACCATATCAGTAGACACGTCCAAGAATCAGTTCTCCCTGAAGCTGAGCTCTGTGACCGCCGCGGACACGGCTGTGTATTACTGTGCGAGAGGCAATGCAGTAAGTACGTTCTTTTACTACGACTACCACGGAATGGACGTCTGGGGGCAAGGGACCACGGTCACCGTCTCCTCA	GACATCCAGATGACCCAGTCTCCATCCTCCCTGTCTGCATCTGTAGGAGACAGAGTCACCATCACTTGCCGGGCAAGTCAGGGCATTAGAAATGATTTAGGCTGGTATCAACAGAAACCAGGGAAAGCCCCTAAGCGCCTGATCTATGCTGCATCCAGTTTGCAAAGTGGGGTCCCATCAAGGTTCAGCGGCAGTGGATCTGGGACAGAATTCACTCTCACAATCAGCAGCCTGCAGCCTGAAGATTTTGCAACTTATTACTGTCTACAACATAATAGTTACCCGTGGACGTTCGGCCAAGGGACCAAGGTGGAAATCAAA
71	IML3694	Pre-vax	ADI-67638	IGHV5-51*03	IGHD2-8*01	IGHJ6*03	IGKV4-1*01	IGKJ2*01	4.7	1.7	S2	Yes		>1.0				GCGAGACATTTCGCTGACTGTAATCAAGGAATATGCCATAGCGACTACTACTCCTACATGGACGTC	ARHFADCNQGICHSDYYSYMDV	CAGCAATATTATAGTACTGTCACT	QQYYSTVT	GAGGTGCAGCTGGTGCAGTCTGGAGCAGAGGTGAAAAAGCCGGGGGAGTCTCTGAAGATCTCCTGTAAGGGTTCTGGATACAGGTTTAGCAGCTACTGGATCGCCTGGGTGCGCCAGACGCCCGGGAAAGGCCTGGAGTGGATGGGGAGCATCTATCCTGGTGACTCTGATACCAAATTTAGCCCGTCCTTCCAAGGCCAAGTCACCATCTCAGTCGACAAGTCCATCAGTACCGCCTACGTGCAGTGGAACAGTCTGAAGGCCTCGGACACCGCCATGTATTACTGTGCGAGACATTTCGCTGACTGTAATCAAGGAATATGCCATAGCGACTACTACTCCTACATGGACGTCTGGGGCAAAGGGACCACGGTCACCGTCTCCTCA	GACATCGTGATGACCCAGTCTCCAGACTCCCTGGCTGTGTCTCTGGGCGAGAGGGCCACCATCAACTGCAAGTCCAGCCGGACTGTTTTACACATCTCCAACAATAAGAACTACTTAGCTTGGTACCAGCAGAAACCAGGACAGCCTCCTAAGCTGCTCATTTACTGGGCATCTACCCGGGAATCCGGGGTCCCTGACCGATTCAGTGGCAGCGGCTCTGGGACAGATTTCACTCTCACCATCAGCAGCCTGCAGGCTGAAGATGTGGCAGTTTATTACTGTCAGCAATATTATAGTACTGTCACTTTTGGCCAGGGGACCAAGCTGGAGATCAAA
72	IML3694	Pre-vax	ADI-67639	IGHV3-30-3*01	IGHD1-26*01	IGHJ4*02	IGKV3-15*01	IGKJ1*01	4.1	1.4	S2	No						GCGAGGACTGATGGGACCTACTTCGCCCCCTTTGACTCC	ARTDGTYFAPFDS	CAGCAGTATGATAACTGGTGGACG	QQYDNWWT	CAGGTGCAGCTGGTGGAGTCTGGGGGAGGCGTGGTCCACCCTGGGAGGTCCCTGAGACTCTCCTGTGCAGCCTCTGGATTCACTTTCAGTGGCTATGCTATGCACTGGCTCCGCCAGGCTCCAGGCAGGGGGCTGGAGTGGGTGGCAGTTATATCATATGATGGAACCAATAAATACTACGCAGATTCCGTGAAGGGCCGATTCACCCTCTCCAGAGACAATTCCAAGAACACGCTGTATCTGCAACTGAACAGCCTTAGAGCTGAGGACACGGCTGTCTATTTCTGTGCGAGGACTGATGGGACCTACTTCGCCCCCTTTGACTCCTGGGGCCAAGGAACCCTGGTCACCGTCTCCTCA	GAAATAGTGATGACGCAGTCTCCAGCCACCCTGTCTGTGTCTCCAGGGGAAAGAGCCACCCTCTCCTGCAGGGCCAGTCAGAGTGTTAGCAGCAAGTTGGCCTGGTACCAGCAGAAACCTGGCCAGGCTCCCAGGCTCCTCATCTATGGTGCATCCACCAGGGCCACGGGTATCCCAGCCAGGTTCAGTGGCAGTGGGTCTGGGACAGAGTTCACTCTCACCATCAGCAGCCTGCAGTCTGAAGATTTTGCAGTTTATTACTGTCAGCAGTATGATAACTGGTGGACGTTCGGCCAAGGGACCAAGGTGGAAATCAAA
73	IML3694	Pre-vax	ADI-67642	IGHV3-30-3*01	IGHD1-26*01	IGHJ4*02	IGKV4-1*01	IGKJ2*01	4.1	2.6	S2	No						GCGAGACCCCACGGTGGGAACTACTGGGGTTACTTTGACTGC	ARPHGGNYWGYFDC	CAACAATATTCCAGTACTCCTGCT	QQYSSTPA	CAGGTGCAGCTGGTGGAGTCTGGGGGAGGCGTGGTCCAGCCTGGGAGGTCCCTGAGACTCTCCTGTGCAGCCTCTGGATTCACATTCAGTACTTATGCTATCTACTGGGTCCGCCAGGCTCCAGGCAAGGGGCTGGAGTGGGTGGCTGTTATATCATATGATGGATACAATAAATACTACGCAGACTCCGTGAAGGGCCGATTCACCATCTCCAGAGACAATTCCAAGAACACGCTGTTTCTGCAAATGAACACCCTGAGAACTGAGGACACGGCTGTCTATTACTGTGCGAGACCCCACGGTGGGAACTACTGGGGTTACTTTGACTGCTGGGGCCAAGGAACCCTGGTCACCGTCTCCTCA	GACATCGTGATGACCCAGTCTCCAGAGTCCCTGGCTGTGTCTCTGGGCGAGAGGGCCACCATCAACTGCAAGTCCAGCCAGAGTCTTTTATACAGCTCCAACAATGAGAACTCCTTAGCTTGGTACCAGCAGAAACCAGGACAGCCTCCTAAGCTGCTCATTTACTGGGCATCTACCCGGGATTCCGGGGTCCCTGACCGATTCAGTGGCAGCGGGTCTGGGACAGATTTCACTCTCACCATCAGCAGCCTGCAGGCTGAAGATGTGGCAGTTTATTACTGTCAACAATATTCCAGTACTCCTGCTTTTGGCCAGGGGACCAAGCTGGAGATCAAA
74	IML3694	Pre-vax	ADI-67647	IGHV4-59*01	IGHD3-3*01	IGHJ6*02	IGKV3-20*01	IGKJ1*01	5.8	1.8	S2	No						GCGAGAGGTTTCGATTTT	ARGFDF	CACCAGTATGGTAGCTCATCGTGGACG	HQYGSSSWT	CAGGTGCAGCTGCAGGAGTCGGGCCCAAGACTGGTGAGGCCTTCGGAGACCCTGTCCCTCACCTGCTCTGTCTCTGGTGACTCCATCAGTAGTTACTACTGGAGCTGGATCCGCCAGTCCCCAGAGAAGGGACTGGAGTGGATTGGCTATATCTACTATAGTGGGAGCACCAAGTACAACCCCTCCCTCAAGAGTCGAGTCACCATATCAGTAGACACGTCCAAGAACCAGTTCTCCCTCAGGCTGACGTCTGTGACCGCTGCGGACACGGCCGTTTACTACTGTGCGAGAGGTTTCGATTTTTGGGGGCAAGGGACCACGGTCACCGTCTCCTCA	GAAATTGTGTTGACGCAGTCTCCAGGCACCCTGTCCTTGTCTCCAGGGGAAAGAGCCACCCTCTCCTGCAGGGCCAGTCAGAGTGTTAGCAGCATCTACTTAGCCTGGTACCAGCAGAAACCTGGCCAGGCTCCCAGGCTCCTCATCTTTGCTGCATCCAGCAGGGCCACTGGCATCCCAGACAGGTTCAGTGGCAGTGGGTCTGGGACAGACTTCACTCTCACCATCAGCAGACTGGAGCCTGAAGATTTTGCAGTGTATTACTGTCACCAGTATGGTAGCTCATCGTGGACGTTCGGCCAAGGGACCAAGGTGGAAATCAAA
75	IML3694	Pre-vax	ADI-67648	IGHV4-59*01	IGHD3-3*01	IGHJ6*02	IGKV1D-12*01	IGKJ4*01	5.5	5.6	Undefined	No						GCGAGAGTTTCCCAGAACACGTATAACGATTACCAGTTCGACCCC	ARVSQNTYNDYQFDP	CAACAAACTAACAGTTTCCCTCTCACT	QQTNSFPLT	CAGGTGCAGCTGCAGGAGTCGGGCCCAGGACTGGTAAAGCCTTCGGAGACCCTGTCCCTCTCGTGCACTGTCTTTGGTGGCTTCGTCAGAAATTACTACTGGAGCTGGATCCGGCAGCCCCCAGGGAAGGGACTGGAATGGATTGGATATATCCATTACAGTGGGAGCACCAACTACAGGCCCTCCCTCAGGAGTCGAGTCACCATATCAGTAGACATGTCCAAGAACCAGTTCTCCCTGAAGCTGAGGTCTGTGACCGCTGCGGACACGGCCGTGTATTACTGTGCGAGAGTTTCCCAGAACACGTATAACGATTACCAGTTCGACCCCTGGGGGCAAGGGACCACGGTCACCGTCTCCTCA	GACATCCAGATGACCCAGTCTCCATCTTCTGTGTCTGCATCTGTAGGAGACAGAGTCACCATCACTTGTCGGGCGAGTCAGGGCATTAGCAGCTGGTTAGCGTGGTATCAGCAGAAACCAGGGCACGCCCCTGAACTCCTAGTCTATAGTGCATCCAATTTACAAAGGGGGGTCCCATCAAGGTTCAGCGGCAGTGGATCTGGGACAGATTTCACTCTCACTATCAGCAGCCTGCAGCCTGAGGATTTTGCAACTTACTATTGTCAACAAACTAACAGTTTCCCTCTCACTTTCGGCGGAGGGACCAAGGTGGAGATCAAA
76	IML3694	Pre-vax	ADI-67649	IGHV4-4*02	IGHD2-2*01	IGHJ4*02	IGKV3-11*01	IGKJ3*01	5.1	1.7	RBD	No		0.012	>1.0	0.0302		GCGAGAGATATTCGACAGGACGATTGTAGTACTACTAGGTGCCCTGAATAT	ARDIRQDDCSTTRCPEY	CAGCAGCGTAGCAACTGGCCTCCGACT	QQRSNWPPT	CAGGTGCAGCTGCAGGAGTCGGGCCCAAGACTGGTGAGGCCTGCGGGGACCCTGTCCCTCACCTGCGCTGTCTCTGGTGGCTCCATCAGGAGTAGTAATTGGCGGAGTTGGGTCCGCCAGCCCCCAGGGAAGGGGCTGGAGTGGATTGGAGAAATCTATCATACTGGGGGCACCAACTATAACCCGTCCCTCAAGAGTCGAGTCACCATATCAGTAGACAAGTCCACGAACCAGTTCTCCCTGAGGTTGGACTCTGTGACCGCCGCGGACACGGCCGTGTATTACTGTGCGAGAGATATTCGACAGGACGATTGTAGTACTACTAGGTGCCCTGAATATTGGGGCCAAGGAACCCTGGTCACCGTCTCCTCA	GAAATTGTGTTGACACAGTCTCCAGCCACCCTGTCTTTGTCTCCAGGGGAAAGAGCCACCCTCTCCTGCAGGGCCAGTCAGAGTGTTACCAGCTCCTTAGCCTGGTACCAACAGAAACCTGGCCAGGCTCCCAGGCTCCTCATCTATGATGCATCCTACAGGGCCACTGGCATCCCAGCCAGGTTCAGTAGCAGTGGGTCTGGGACAGACTTCACTCTCACAATCAGCAGCCTAGAGCCTGAAGATTTTGCAGTTTATTACTGTCAGCAGCGTAGCAACTGGCCTCCGACTTTCGGCCCTGGGACCAAAGTGGATATCAAA
77	IML3694	Pre-vax	ADI-67650	IGHV3-13*01	IGHD5-18*01	IGHJ6*03	IGKV1-39*01	IGKJ1*01	5.8	3.5	RBD	No						GTTAGAGGAGACACCTATGGCAACTACTACTACATGGACGTC	VRGDTYGNYYYMDV	CAGCAGACTTACATTACCCCTTCGTGGACG	QQTYITPSWT	GAGGTGCAGCTGGTGGAGTCTGGGGGAGGCTTGGTACAGCCTGGGGGGTCCCTGAGACTCTCCTGTGCAGCCTCTGGATTCATGTTCAGTAATTACGACATGCACTGGGTCCGCCAAACTACAGGAAAAGGTCTGGAGTGGGTCTCAACTATTGGTTCTTCTGGTGACACATACTATCCAGGCTCAGTGAAGGGCCGATTCACCATCTCCAGAGAAGATGCCAAGAATTCCTTGTATCTTCAGATGAACAGCCTGAAAGCCGGGGACACGGCTGTCTATTATTGTGTTAGAGGAGACACCTATGGCAACTACTACTACATGGACGTCTGGGGCAAAGGGACCACGGTCACCGTCTCCTCA	GACATCCAGATGACCCAGTCTCCATCCTCCCTGTCTGCATCTGTAGGAGACAGAGTCACCATCACTTGCCGGGCAAGTCAGAGTATTGGCAGCTATTTAAATTGGTATCAGCATAAACCAGGGAGAGCCCCTAAACTCCTGATCTATGCTGCATCCAGTTTGCAGAGTGGGGTCCCATCAAGGTTCCGTGGCAGTGGATCTGGGACAGATTTCACTCTCACCATCAGCAGTCTGCAACCTGAAGATTTTGCAACTTACTACTGTCAGCAGACTTACATTACCCCTTCGTGGACGTTCGGCCAAGGGACCAAGGTGGAAATCAAA
78	IML3694	Pre-vax	ADI-67651	IGHV1-46*03	IGHD3-3*01	IGHJ6*02	IGKV2-28*01	IGKJ4*01	8.2	1.7	Undefined	No						GCTAGTAAAGGCCATAGAGATGCCTACAATTTACGAGGGGACAACTACGGTTTGGACGTC	ASKGHRDAYNLRGDNYGLDV	ATGCAAGCTCTACAAACTCCCCTCACT	MQALQTPLT	CAGGTGCAGCTGGTGCAGTCTGGGGCTGAGGTGAAGAAGCCTGGGGCCTCAGTGAAGATTTCCTGTTGGACGTCTGGATACACCTTCACCACCTACTATATACACTGGGTGCGACAGGCCCCTGGACAAGGCCTTGAGTGGATGGGAAAAATCAACCCGAGTGGTGATACCACAAACTACGCACAGAAGTTCCAGGGCAGAGTTACCATGACCCGGGACACGTCCACGAACACAGTCTATATGCAGCTGAGCAACCTGAGATCTGACGACACGGCCGTGTATAGTTGTGCTAGTAAAGGCCATAGAGATGCCTACAATTTACGAGGGGACAACTACGGTTTGGACGTCTGGGGGCAAGGGACCACGGTCACCGTCTCCTCA	GATATTGTGATGACTCAGTCTCCACTCTCCCTGCCCGTCATTCCTGGAGAGCCGGCCTCCATCTCCTGCAGGTCTAGTCAGAGCCTCCTGCATTTTAATGGATACAACTATTTGGATTGGTACCTGCAGAAGCCAGGGCAGTCTCCACAGCTCCTGATCTATTTGGGTTCTAATCGGGCCTCCGGGGTCCCTGACAGGTTCAGTGGCAGTGGATCAGGCACAGATTTTACACTGAAAATCAGCAGAGTGGAGGCTGAGGATGTTGGGATTTATTACTGCATGCAAGCTCTACAAACTCCCCTCACTTTCGGCGGAGGGACCAAGGTGGAGATCAAA
79	IML3694	Pre-vax	ADI-67652	IGHV1-2*02	IGHD3-3*01	IGHJ6*03	IGLV2-23*02	IGLJ3*02	5.7	4.1	RBD	No	0.007542	0.1698	>1.0	0.302		GCGAGAGATCGGAATTGGGCGATTTTTGGAGTGGAATCGGACGTC	ARDRNWAIFGVESDV	TCATATGCAGATAGCAGCGCCTGGGTG	SYADSSAWV	CAGGTGCAGCTGGTGCAGTCTGGGGCTGAGGTGAAGAAGCCTGGGGCCTCAGTGAAGGTCTCCTGCAAGGCTTCTGGATACACCTTCACCGGCCACTTTATTCACTGGGTGCGACAGGCCCCTGGACAAGGACTTGAGTGGATGGGATGGATCAATCCTATGAGTGGAAACACAAACTATGCACAGACATTTCAGGGCAGGGTCACCATGACCAGGGACACGTCCATCCAGACAGTCTACATGGAGCTGAGCAGGCTGAGATCTGACGACACGGCCGTTTATTACTGTGCGAGAGATCGGAATTGGGCGATTTTTGGAGTGGAATCGGACGTCTGGGGCAAAGGGACCACGGTCACCGTCTCCTCA	CAGTCTGCCCTGACTCAGCCTGCCTCCGTGTCTGGGTCTCCTGGACAGTCGATCACCATCTCCTGCACTGGAACCAGCAGTGATATTAGGACTTATAACCTTGTCTCCTGGTACCAACAACACCCAGGCAATGCCCCCAAACTCATGATTTATGAGGTCAATAAGCGGCCCTCAGGGATTTCTCATCGCTTCTCTGGCTCCAAGTCTGGCCACACGGCCTCCCTGACAATCTCTGGGCTCCAGGCTGAGGACGAGGCTGATTATTATTGCTGCTCATATGCAGATAGCAGCGCCTGGGTGTTCGGCGGAGGGACCAAGCTGACCGTCCTA
80	IML3694	Pre-vax	ADI-67653	IGHV3-23*01	IGHD6-25*01	IGHJ4*02	IGLV3-1*01	IGLJ2*01	6.8	3.2	NTD	No						GCGAAAGTTCTTGGGCAGCGGCTGGAATTTGACTAC	AKVLGQRLEFDY	CAGGCGTGGGACAGCAGCACTTATGTGGTA	QAWDSSTYVV	GAGGTGCAGCTGTTGGAGTCTGGGGGAGGCTTGGTACAGCCGGGGGGGTCCCTGAGGCTCTCCTGTGTAGCCTCTGGATTCACCTTTAGTAGCTATGCCATGAACTGGGTCCGCCAGGCTCCAGGGAAGGGGCTGGAATGGATCTCAACTATTAGTGGTGGTGGCGGTAATTCATATTACGCAGAATCCGTGAAGGGCCGGTTCACCATCTCCAGAGACAATTCCAAGAACACGCTGTATCTGCACCTGAACGGCCTGAGAGCCGAAGACATGGCCGTATATTACTGTGCGAAAGTTCTTGGGCAGCGGCTGGAATTTGACTACTGGGGCCAAGGAACCCTGGTCACCGTCTCCTCA	TCCTATGAGCTGACTCAGCCACCCTCAATGTCCGTGTCCCCAGGACAGACAGTCAGCATCATCTGCTCTGGAGATAAATTGGGGGATAAATATGCTTCCTGGTATCAGCAGAAGCCAGGCCAGTCCCCTGTACTGGTCATCTATCAAGATGACAGGCGGCCCTCAGGGATCCCTGAGCGATTCTCTGGCTCCAACTCTGGGAACACAGCCACTCTGACCATCAGCGGGACCCAGGCTGTGGATGAGGCTGACTATTACTGTCAGGCGTGGGACAGCAGCACTTATGTGGTATTCGGCGGAGGGACCAAGCTGACCGTCCTA
81	IML3694	Pre-vax	ADI-67655	IGHV1-2*04	IGHD4-17*01	IGHJ6*02	IGKV3-20*01	IGKJ3*01	3.4	1.7	Undefined	Yes		0.7213				GCGAGAGAATCTACGGGGGCCCCCTTCTCCTATCACTACGGTATGGACGCC	ARESTGAPFSYHYGMDA	CAGCAGTATAGTAGCTCACCTCCCTCCTTCACT	QQYSSSPPSFT	CAGGTGCAGCTGGTGCAGTCTGGGGCTGAGGTGAAGAAGCCTGGGGCCTCAGTGAAGGTCTCCTGCGAGGCTTCTGGATACACCTTCACCGGCCACTATATCAACTGGGTGCGACAGGCCCCTGGACAAGGTCTTGAGTGGATGGGATGGATCAACCCTATCAGTGGTGTCACAAACTATGCACAGAAGTTTCAGGGCTGGGTTACCATGACCAGGGACACGTCCATTAGCACAGCCTACATGGAGCTGAGCAGGCTGAAATCTGACGACACGGCCGTGTATTACTGTGCGAGAGAATCTACGGGGGCCCCCTTCTCCTATCACTACGGTATGGACGCCTGGGGGCAAGGGACCACGGTCACCGTCTCCTCA	GAAATTGTGTTGACGCAGTCTCCAGGCACCCTGTCTTTGTCTCCAGGGGAAAGAGCCACCCTCTCCTGCAGGGCCAGTCAGAGTGTTAGCAGCAGCTACTTAGCCTGGTACCAGCAGAAACCTGGCCAGGCTCCCAGGCTCCTCATCTATGGTGCATCCGACAGGGCCACTGGCATCCCAGACAGGTTCAGTGGCAGTGGGTCTGGGACAGACTTCACTCTCACCATCAGCAGACTAGAGCCTGAAGATTTTGCAGTATATTACTGTCAGCAGTATAGTAGCTCACCTCCCTCCTTCACTTTCGGCCCTGGGACCAAAGTGGATATCAAA
82	IML3694	Pre-vax	ADI-67657	IGHV3-23*01	IGHD2-2*01	IGHJ4*02	IGKV4-1*01	IGKJ1*01	3.7	1.7	RBD	No	0.00269	0.0007		>1.0	2.139	GCGAAAGATAGACTCCGCACTTCCTCGTTGCAGCCTATGCCCTTTTTTGACTAC	AKDRLRTSSLQPMPFFDY	CAGCAATATTATAGTGCTCCGTACACT	QQYYSAPYT	GAGGTGCAGCTGTTGGAGTCTGGGGGAGGCTTGGTACAGCCTGGGGGGTCCCTGAGACTCTCCTGTGCAGCCTCTGGATTCCCCTTTAGCACCTATGCCATGAGCTGGGTCCGCCAGGCTCCAGGGAAGGGCCTGGAGTGGGTCTCAGCTATTGGTGGTAGTGGTAGTGACACATACTACGCAGACTCCGTGAAGGGCCGGTTCACCATCTCCAGAGACAATTCCGAGAACACACTGTTTCTGCAAATGAACAGCCTGAGAGCCGAGGACACGGCCGTTTATTACTGTGCGAAAGATAGACTCCGCACTTCCTCGTTGCAGCCTATGCCCTTTTTTGACTACTGGGGCCAAGGAACCCTGGTCACCGTCTCCTCA	GACATCGTGATGACCCAGTCTCCAGACTCCCTGGCTGTGTCTCTGGGCGAGAGGGCCACCATCAACTGCAAGTCCAGCCAGAGTGTTTTATACAGCTCCAACAATAAGAACTACTTAGCTTGGTACCAGCAGCAACCAGGACAGCCTCCTAGGCTGCTCATTTACTGGACATCTACCCGGGAATCCGGGGTCCCTGACCGATTCAGTGGCGGCGGGTCTGGGACAGATTTCACTCTCACCATCAGCAGCCTGCAGGCTGAAGATGTGGCAGTTTATTACTGTCAGCAATATTATAGTGCTCCGTACACTTTCGGCCAAGGGACCAAGGTGGAAATCAAA
83	IML3694	Pre-vax	ADI-67663	IGHV1-46*03	IGHD3-3*01	IGHJ6*02	IGKV2-28*01	IGKJ4*01	8.2	1.7	Undefined	No						GCTAGTAAAGGCCATAGAGATGCCTACAATTTACGAGGGGACAACTACGGTTTGGACGTC	ASKGHRDAYNLRGDNYGLDV	ATGCAAGCTCTACAAACTCCCCTCACT	MQALQTPLT	CAGGTGCAGCTGGTGCAGTCTGGGGCTGAGGTGAAGAAGCCTGGGGCCTCAGTGAAGATTTCCTGTTGGACGTCTGGATACACCTTCACCACCTACTATATACACTGGGTGCGACAGGCCCCTGGACAAGGCCTTGAGTGGATGGGAAAAATCAACCCGAGTGGTGATACCACAAACTACGCACAGAAGTTCCAGGGCAGAGTTACCATGACCCGGGACACGTCCACGAACACAGTCTATATGCAGCTGAGCAACCTGAGATCTGACGACACGGCCGTGTATAGTTGTGCTAGTAAAGGCCATAGAGATGCCTACAATTTACGAGGGGACAACTACGGTTTGGACGTCTGGGGGCAAGGGACCACGGTCACCGTCTCCTCA	GATATTGTGATGACTCAGTCTCCACTCTCCCTGCCCGTCATTCCTGGAGAGCCGGCCTCCATCTCCTGCAGGTCTAGTCAGAGCCTCCTGCATTTTAATGGATACAACTATTTGGATTGGTACCTGCAGAAGCCAGGGCAGTCTCCACAGCTCCTGATCTATTTGGGTTCTAATCGGGCCTCCGGGGTCCCTGACAGGTTCAGTGGCAGTGGATCAGGCACAGATTTTACACTGAAAATCAGCAGAGTGGAGGCTGAGGATGTTGGGATTTATTACTGCATGCAAGCTCTACAAACTCCCCTCACTTTCGGCGGAGGGACCAAGGTGGAGATCAAA
84	IML3694	Pre-vax	ADI-67664	IGHV3-30*18	IGHD5-12*01	IGHJ6*02	IGLV2-8*01	IGLJ3*02	5.1	2.1	Undefined	No		>1.0				GCGAAATCCCTTTTGGGTGGCTACTATGCGCGTCTCTACGACTATTACGGTATGGACGTC	AKSLLGGYYARLYDYYGMDV	AGCTCATATGCAGGCAGCAACCTTTGGGTG	SSYAGSNLWV	CAGGTGCAGCTGGTGGAGTCTGGGGGAGGCGTGGTCCAGCCTGGGAGGTCCCTGAGACTCTCCTGTGCAGCCTCTGGATTCACTTTCAATAGATATGGCATTCACTGGGTCCGCCAGGCTCCAGGCAAGGGCCTGGAGTGGGTGGCATTTATATCACATGATGGAAGTAAAAATTGGTACGCAGACTCCGTGAAGGGCCGATTCACCATCTCCAGAGACAATTCCAAGAACACGCAGTATCTGCAAATGAACAGCCTGAGAGGCGAGGACACGGCTGTGTATTACTGTGCGAAATCCCTTTTGGGTGGCTACTATGCGCGTCTCTACGACTATTACGGTATGGACGTCTGGGGGCAAGGGACCACGGTCACCGTCTCCTCA	CAGTCTGCCCTGACTCAGCCTCCCTCCGCGTCCGGGTCTCCTGGACAGTCAGTCACCATCTCCTGCACTGGAACCAGCAGTGACGTTGGTGGTTATAACTATGTCTCCTGGTTCCAACAACACCCAGGCAGAGCCCCCAAGCTCCTGATTTATGAGGTCAATAAGCGGCCCTCAGGGGTCCCTGATCGCTTCTCTGGCTCCAAGTCTGGCAACACGGCCTCCCTGACCGTCTCTGGGCTCCAGGCTGAGGATGAGGCTGATTATTACTGCAGCTCATATGCAGGCAGCAACCTTTGGGTGTTCGGCGGAGGGACCAAGCTGACCGTCCTA
85	IML3694	Pre-vax	ADI-67665	IGHV4-59*01	IGHD3-9*01	IGHJ6*02	IGKV3-20*01	IGKJ1*01	8.6	4.6	S2	No		>1.0				GCGAGAGGCTTTGAGACG	ARGFET	CTACAGTCTGGTGGCTCGTGGACG	LQSGGSWT	CAGGTGCAGCTGCAGGAGTCGGGCCCAAGACTGGTGAAGCCTTCGGAGACCCTGTCCCTCATATGCACTGTCTCTGGTGGCTCTGTCAGTGGTTACTACTGGAGTTGGTTCCGGCAGCCCCCAGGGAAGGGACTGGAGTGGATTGGATATATCTATGGCACTGGGCCCACCAAATTCAATCCCTCCCTCAAGAGTCGATTCTCCATGTCAGTCGACACGTCCAAGAACCAGTTCTCCCTGAAGTTGATCTCTGTGAGCGCTGCTGACACGGCCGTGTATTACTGTGCGAGAGGCTTTGAGACGTGGGGGCAAGGGACCACGGTCACCGTCTCCTCA	GAAATTGTGTTGACGCAGTCTCCAGGCACCCTGTCTTTGTCTCCAGGGGATAGAGCCACCCTCTCCTGCAGGGCCAGTCAGAGTTTTAGCAGCAACTACTTAGCCTGGTTCCAGCAGAAACCTGGCCAGGCTCCCAGGCTCCTCATCTATGCTGCATCCAGCAGGGCCATTGGCATCCCAGACAGGTTCAGTGGCAGTGGGTCTGGGACAGACTTCACTCTCACCATCAGCAGACTGGAGCCTGAAGATTTTGCAATATATTATTGTCTACAGTCTGGTGGCTCGTGGACGTTCGGCCAAGGGACCAAGGTGGAAATCAAA
86	IML3694	Pre-vax	ADI-67667	IGHV3-23*01	IGHD4-17*01	IGHJ4*02	IGLV2-5*01	IGLJ7*01	5.4	7.1	NTD	No						GCGAAAGATCTGGGGGGCTACAGTGACTTCGGATCGGGTGACTTC	AKDLGGYSDFGSGDF			GAGGTGCAGCTGGTGGAGTCTGGGGGAGGCTTGGTACAGCCTGGGGGGTCCCTGAGACTCTCCTGTTCAGGCTCTGGATTCACCTTTAGCAGTTACGCCATGAGCTGGGTCCGCCAGGCTCCAGGAAAGGGGCTGGAGTGGGTCTCACTTGTTAGTGGTAGTGGTGCCGCCACATACTACGCAGACTCCGTGAAGGGCCGGTTCACCATCTCCAGAGACAATTCCGAGAACACGGTGTATCTGCAATTGAACAGCCTGAGAGCCGAGGACACGGCCGTATATTACTGTGCGAAAGATCTGGGGGGCTACAGTGACTTCGGATCGGGTGACTTCTGGGGCCAAGGAACCCTGGTCACCGTCTCCTCA	CAGTCTGCCCTGACTCAGCCTCCCTCCGTGTCCGGGTCTCCTGGACAGTCAGTCACCATCTCCTGCACTGGAACCAGCAGTGATGTTGAGAATTATGACTATGTCTCCTGGTACCAACAGCACCCCGGCACAGTCCCCAAACCCATGATCTACAATGTCCATAGGCCCCCCTCAAGGGTCCCTGATCGTTTCTCTGGCTCCAAGTCTGGCAATACGGCCTCCCTGGCCATCAGTGGGCTCCAGTCTGAGGATGAGGCTGAGTATTACTGTGCAGCATGGGATGACAGCCTGAATGGTTGCGTGTTCGGAGGAGGCACCCAGCTGACCGTCCTC
87	IML3694	Pre-vax	ADI-67671	IGHV4-31*03	IGHD6-13*01	IGHJ6*02	IGKV1-5*03	IGKJ2*01	5.7	3.7	Undefined	No		>1.0				GCGAGAGATAGAATAGCAGACTTTCAATACTACGGTATGGACGTC	ARDRIADFQYYGMDV			CAGGTGCAGCTGCAGGAGTCGGGCCCAGGACTGGTGAAGTCCTCACAGACCCTGTCCCTCACCTGCAGTGTCTCTGGTGGCTCCCTCAACAGTGGTGGTTACTACTGGACCTGGATCCGCCAGCACCCAGGGAAGGGCCTGGAGTGGATTGGGTACATCTCTTACACTGGCAGCATCAACTACAACCCGTCCCTCAGGAGTCGAGTTAGCATATCAGTTGACACGTCTAAGAACCAGTTCTCCCTGAGGCTGAGCTCTGTGACTGTCGCGGACACGGCCGTTTATTACTGTGCGAGAGATAGAATAGCAGACTTTCAATACTACGGTATGGACGTCTGGGGGCAAGGGACCACGGTCACCGTCTCCTCA	GACATCCAGATGACCCAGTCTCCTTCCACCCTGTCTGCATCTGTCGGAGACAGAGTCACCATCACTTGCCGGGCCAGTCAGAGTATTAGTAATTTGTTGACCTGGTATCAGCAGAAACCAGGGAAAGCCCCTAAGTTGTTGATCTATAAGGCGTCTACTTTAGAAAGTGGGGTCCCATCAAGGTTCAGCGGCAGTGCATCTGGGACAGAATTCACTCTCACCATCAGCAGCCTGCAGCCTGATGATTTTGCAACTTATTACTGCCAACACCAGAGGACGTATGGCCAGGGGACCAAGCTGGAGATCAAA
88	IML3694	Pre-vax	ADI-67672	IGHV1-2*02	IGHD4-4*01	IGHJ6*03	IGLV8-61*01	IGLJ3*02	6.5	3.4	S2	No						GCGACATACAGTCACTACTTCATCAGTTTGTACTACTACATGGACGTC	ATYSHYFISLYYYMDV	GTGCTGTATATGGGTAGTGGCCTTTGGGTG	VLYMGSGLWV	CAGGTGCAGCTGGTGCAGTCTGGGGCTGAGGTGAAGAAGCCTGGGGCGTCAGTGAAAGTCTCCTGTAAGGCCTCTGGATACAGCTTCTCCGACTATTATATACATTGGGTGCGACAGGCCCCTGGACAAGGGCTTGAGTGGATGGGATGGATCAACGCAAACAGTGGTGACACAAAGTATGCACAGAAGTTTCAGGGCAGGGTCACCATGACCAGGGACACGTCCATCAGCACAGCCTACATGGAGCTGAGGACGTTGAGATATGACGACACGGCCGTGTATTTCTGTGCGACATACAGTCACTACTTCATCAGTTTGTACTACTACATGGACGTCTGGGGCAAAGGGACCACGGTCACCGTCTCCTCA	CAGACTGTGGTGACCCAGGAGCCATCGTTCTCAGTGTCCCCTGGAGGGACAGTCACACTCACTTGTGGCTTGAGCTCTGGCTCAGTCTCTACTAGTTACTACCCCAGTTGGTACCAACAGAGCCCCGGCCAGGCTCCACGCACGCTCATCTACAACACAAACAGTCGCTCTTCTGGGGTCCCTGATCGCTTCTCTGGCTCCATCCTTGGGAACAAAGCTGCCCTCACCATCACGGGGGCCCAGGCAGACGATGAATGTGATTATTATTGTGTGCTGTATATGGGTAGTGGCCTTTGGGTGTTCGGCGGAGGGACCAAGCTGACCGTCCTA
89	IML3694	Pre-vax	ADI-67673	IGHV3-23*01	IGHD6-13*01	IGHJ6*02	IGLV2-14*01	IGLJ1*01	3.7	2.7	S2	No						GCGAAAGGGGGGTATTCGCATTTCCGTTACTACTATGGTATGGACGTC	AKGGYSHFRYYYGMDV	GGCTCATATACAACCGGCAGCACTCCCTGTTATGTC	GSYTTGSTPCYV	GAGGTGCAGCTGTTGGAGTCTGGGGGAGACTTGGTACAGCCTGGGGGGTCCCTGAGACTCTCCTGTGCAGCCTCTGGATTCATCTTTAGCAGCTATGCCATGAGCTGGGTCCGCCAGGCTCCAGGGAAGGGGCTGGAGTGGGTCTCAGCGATTAGTGGTAGTGGTTATAGCACATACTTCGCAGACTCCGTGAAGGGCCGGTTCACCATCTCCAGAGACAACTCCAAGAACACGCTCTTTCTGCAACTGAACAGCCTGGGAGCCGAGGACACGGCCGTATATTACTGTGCGAAAGGGGGGTATTCGCATTTCCGTTACTACTATGGTATGGACGTCTGGGGGCAAGGGACCACGGTCACCGTCTCCTCA	CAGTCTGCCCTGACTCAGCCTGCCTCCGTGTCTGGGTCTCCTGGACAGTCGATCACCATCTCCTGCACTGGAACCAGCAATGACGTTGGTGGTTATAACTATGTCTCCTGGTTCCAACAGCACCCAGGCAAAGCCCCCAAACTCATGATCTATGATGTCATTAATCGGCCCTCAGGGGTTTCTAATCGCTTCTCTGGCTCCAAGTCTGGCAACACGGCCTCCCTGACCATCTCTGGGCTCCAGGCTGAGGACGAGGCTGATTATTACTGCGGCTCATATACAACCGGCAGCACTCCCTGTTATGTCTTCGGAACTGGGACCAAGGTCACCGTCCTA
90	IML3694	Pre-vax	ADI-67674	IGHV3-30*03	IGHD3-22*01	IGHJ1*01	IGKV3-11*01	IGKJ4*01	2.4	1.7	S2	No						GCGAGCGGCCTCGGTGGAAATTATTACTACGTGGGCGAC	ASGLGGNYYYVGD	CAGCAGCGTAGCAACTGGCCTCCGATTCTCACT	QQRSNWPPILT	CAGGTGCAGCTGGTGGAGTCTGGGGGAGGCGTGGTCCAGCCTGGGAGGTCCCTGAGACTCTCCTGTGCAGCCTCTGGATTCATCTTCAGTACCTATGGCATGCACTGGGTCCGCCAGGCTCCAGGCAAGGGGCTGGAGTGGGTGGCAGTTATATCATATGATGGAGATAATAAATACTATGCAGACTCCATGAAGGGCCGATTCACCATCTCCAGAGACAATTCCAAGAACACGCTCTATCTGCAAATGAACAGCCTGAGAGCTGAGGACACGGCTGTCTATTACTGTGCGAGCGGCCTCGGTGGAAATTATTACTACGTGGGCGACTGGGGCCAGGGCACCCTGGTCACCGTCTCCTCA	GAAATTGTGTTGACACAGTCTCCAGCCACCCTGTCTTTGTCTCCAGGGGAAAGAGCCACCCTCTCCTGCAGGGCCAGTCAGAGTATTGCCAGCTACTTAGCCTGGTACCAACAGAAACCTGGCCAGGCTCCCAGGCTCCTCATCTATGATGCATCCAACAAGGCCACTGGCATCCCACCCAGGTTCAGTGGCAGTGGGTCTGGGACAGACTTCACTCTCACCATCAGCAGCCTAGAGCCTGAAGATTTTGCAGTTTATTACTGTCAGCAGCGTAGCAACTGGCCTCCGATTCTCACTTTCGGCGGAGGGACCAAGGTGGAGATCAAA
91	IML3694	Pre-vax	ADI-67675	IGHV3-7*01	IGHD3-3*01	IGHJ6*02	IGLV2-11*01	IGLJ2*01	4.7	3.4	Undefined	No						GCGAGAGGGCCCGTACATTATAGATTGGAGGGAATTACCATTGCAACGTTTTACACTTTTGATATG	ARGPVHYRLEGITIATFYTFDM	TCATATGCAGGCAGTCACACTGTGCTT	SYAGSHTVL	GAGGTGCAGCTGGTGGAGTCTGGGGGAGGCTTGGTCCAGCCTGGGGGGTCCCTGAGACTCTCCTGTGCAGCCTCTGGATTTACCTTTAAGAGTTTTTGGATGGGCTGGGTCCGCCAGGCTCCGGGGAAGGGGCTGGAGTGGGTGGCCCACATAAATCAAGATGGAAGTGAGAAATATTATGTGGACTCTGTAAAGGGCCGATTCACCATCTCCAGAGACAACGCCAAGAACTCACTGTATCTGCAAATGAACAGCCTGAGAGGCGAGGACACGGCAGTGTATCACTGTGCGAGAGGGCCCGTACATTATAGATTGGAGGGAATTACCATTGCAACGTTTTACACTTTTGATATGTGGGGGCAAGGGACCACGGTCACCGTCTCCTCA	CAGTCTGCCCTGACTCAGCCTCCCTCAGTGTCGGGGTCTCCTGGACAGTCAGTCACCATCTCCTGCACTGGAACCAGCAGTGATGTTGGTGCTTATAACTATGTCTCCTGGTACCAACATCACCCAGGCAAAGCCCCCAAACTCATGATTTATGATGTCAATAAGCGGCCCTCAGGGGTCCCTGATCGCTTCTCTGGCTCCAAGTCTGGCAACACGGCCTCCCTGACCATCTCTGGGCTCCAGGCTGACGATGAAACTGATTATTACTGCTGCTCATATGCAGGCAGTCACACTGTGCTTTTCGGCGGAGGGACCAAGCTGACCGTCCTA
92	IML3694	Pre-vax	ADI-67677	IGHV3-30*03	IGHD4-17*01	IGHJ6*03	IGKV3-11*01	IGKJ4*01	2.4	2.8	NTD	No		>1.0		>1.0		GCGACAGACTACGGTGACTATGGACATTACCAGTACTACTACTACATGGACGTC	ATDYGDYGHYQYYYYMDV	CAGCAGCGTAGCACCTGGCCGCTCACT	QQRSTWPLT	CAGGTGCAGCTGGTGGAGTCTGGGGGAGGCGTGGTCCAGCCTGGGAGGTCCCTGAGACTCTCCTGTGCAGCCTATGGATTCACCTTCAGTAACTATGGCATGCACTGGGTCCGCCAGGCTCCAGGCAAGGGGCTGGAGTGGGTGGCAGTTATATCATATGATGGAAGTAATAACTACTCTGCAGACTCCGTGAAGGGCCGATTCACCATCTCCAGAGACAATTCCAAGAACATGCTGCATCTGCAAATGAACAGCCTGAGAGCTGAGGACACGGCTGTGTATTACTGTGCGACAGACTACGGTGACTATGGACATTACCAGTACTACTACTACATGGACGTCTGGGGCAAAGGGACCACGGTCACCGTCTCCTCA	GAAATTGTGTTGACACAGTCTCCAGCCACCCTGTCTTTGTCTCCAGGGGAAAGAGCCACCCTCTCCTGCAGGGCCAGTCAGAGTGTTGGCAGCTACTTAGCCTGGTACCAACAGAAACCTGGCCAGGCTCCCAGCCTCCTCATCTTTGATGCATTCAACAGGGCCGCTGGCATCCCAGCCAGGTTCAGTGGCAGTGCGTCTGGGACAGACTTCACTCTCACCATCAGCAGCCTAGAGCCTGAAGATTTTGCAGTTTATTATTGTCAGCAGCGTAGCACCTGGCCGCTCACTTTCGGCGGAGGGACCAAGGTGGAGATCAAA
93	IML3694	Pre-vax	ADI-67679	IGHV3-53*02	IGHD3-16*02	IGHJ4*02	IGKV1-33*01	IGKJ5*01	5.8	3.2	RBD	No	0.02026	0.0584	>1.0	0.0599	0.1204	GCGAGAGATTTGGCCGGTCCCGGGTTATTTGACCAC	ARDLAGPGLFDH	CAACAATATGATAATGTCCCTTCGATCACC	QQYDNVPSIT	GAGGTGCAGCTGGTGGAGACTGGAGGAGGCTTGATCCAGCCTGGGGGGTCCCTGAGACTCTCCTGTGCAGTCTCTGGGTTCATCGTCAGTAGAAATTACATGAGTTGGGTCCGCCAGGCTCCAGGGAAGGGGCTGGAGTGGGTCTCAGTCATTTACAGCGGTGGTAGTACGTTCTACGCAGACTCCGTGAAGGGCCGATTCACCATCTCCAGAGACGATTCCAACAACATGATGTATCTTCAAATGAACAGCCTCAGAGCCGACGACACGGCCGTTTATTACTGTGCGAGAGATTTGGCCGGTCCCGGGTTATTTGACCACTGGGGCCAGGGCACCCTGGTCACCGTCTCCTCA	GACATCCAGATGACCCAGTCTCCATCCTCCCTGTCTGCATCTGTAGGAGACAGAGTCACCATCACTTGCCAGGCGAGTCAGGGCATTAGCAACTTTTTGAATTGGTATCAGCAGAAACCAGGGAAAGCCCCTAAGCTCCTGATCTACGATGCATCCATTTTGGAAAGAGGGGTCCCATCAAGGTTCAGTGGAAGTGGATCTGGGACAGATTTTACTCTCACCATCAGCGGCCTGCAGCCTGAAGATATTGCAACATATTACTGTCAACAATATGATAATGTCCCTTCGATCACCTTCGGCCAAGGGACACGACTGGAGATTAAA
94	IML3694	Pre-vax	ADI-67680	IGHV3-33*01	IGHD6-19*01	IGHJ2*01	IGKV1-33*01	IGKJ3*01	3.4	3.9	RBD	No		0.1108	>1.0	0.2379		GCGAGAGATGGAACGATAGCAGTGGCTGGTACTTTCGATCGGTTCTTCGATCTC	ARDGTIAVAGTFDRFFDL	CAACAATATCATATTCTCCCATTCACT	QQYHILPFT	CAGGTGCAGCTGGTGGAGTCTGGGGGAGGCGTGGTCCACCCTGGGAGGTCCCTGAGACTCTCCTGTGCAGCGTCTGGATTCACCTTCAAAACCTATGGCATGCACTGGGTCCGTCAGGCTCCAGGCAAGGGGCTGGAGTGGGTGGCAGTAATATGGTATGATGGAAGTAAAAAATACTATGTAGACTCCGTGAAGGGCCGATTCACCATCTCCAGAGACAATTCCAAGAACACGATGTATCTGCAAATGAACAGCCTGAGAGCCGAGGACACGGCTGTGTATTTCTGTGCGAGAGATGGAACGATAGCAGTGGCTGGTACTTTCGATCGGTTCTTCGATCTCTGGGGCCGTGGCACCCTGGTCACTGTCTCCTCA	GACATCCAGATGACCCAGTCTCCATCCTCCCTGTCTGCATCTGTAGGAGACAGAATCACCATCACTTGCCAGGCGAGTCAGGACATTAGCAACTATTTAAATTGGTATCAGCAGAAACCAGAAAAAGCCCCCAAACTCCTGATCTACGATGCATCCAATTTGGAAGCAGGGGTCCCATCAAGGTTCAGTGGACGTAGATCTGGGACAGATTTTACTTTCACCATCAGCAGCCTGCAGCCTGAAGATATTGCAACATATTACTGTCAACAATATCATATTCTCCCATTCACTTTCGGCCCTGGGACCAAAGTGGATATCAAA
95	IML3694	Pre-vax	ADI-67681	IGHV4-31*03	IGHD2-21*01	IGHJ6*03	IGKV1-39*01	IGKJ4*01	3.7	2.5	S2	No						GCGAGAGGACCAATTGCCACATATTACTACTACATGGACGTC	ARGPIATYYYYMDV	CAACAGAGTTACGGTACCCTCACT	QQSYGTLT	CAGGTGCAGCTGCAGGAGTCGGGCCCAGGACTGGTGAAGCCTTCACAGACCCTGTCCCTCACCTGCAGTGTCTCTGGTGGCTCCATCAACAGTGATAGTTACTACTGGAGCTGGATCCGCCAGCACCCAGGGAAGGGCCTGGAGTGGATTGGGTACATCTATTACAGTGGGACCACCGACTTCAACCCGTCCCTCAAGAGGCGAGTCACCATATCAGTAGACACGTCTAAGAACCAGTTCTCCCTAAAGCTGAGATCTGTGACTGCCGCGGACACGGCCGTGTATTACTGTGCGAGAGGACCAATTGCCACATATTACTACTACATGGACGTCTGGGGCAAAGGGACCACGGTCACCGTCTCCTCA	GACATCCAGATGACCCAGTCTCCATCCTCCCTGTCTGCGTCTGTAGGAGACAGAGTCACCATCACTTGCCGGGCGAGTCAGCGCATTAACACCTATTTAAATTGGTATCAGCAGACACCAGGGAAAGCCCCTAAGCTCCTGATCTATGCTGCATCCAGTTTGCAAAGTGGGGTCCCATCAAGGTTCAGTGGCAGTGGATCTGGGACAGATTTCACTCTCACCATCAGCAGTCTGCAACCTGAAGATTTTGCAACTTACTACTGTCAACAGAGTTACGGTACCCTCACTTTCGGCGGAGGGACCAAGGTGGAGATCAAA
96	IML3694	Pre-vax	ADI-67685	IGHV3-30*18	IGHD6-19*01	IGHJ3*02	IGKV2-30*01	IGKJ2*02	4.4	1.7	S2	Yes						GCGAACGGAGCAGTGGCTGGCGATGATGCTTTTGCTATC	ANGAVAGDDAFAI	ATGCAAGGTACACACTGGCCCTGCACT	MQGTHWPCT	CAGGTGCAGCTGGTGGAGTCTGGGGGAGGCGTGGTCCAGCCTGGGAGGTCCCTAAGACTCTCCTGTGCAGCCTCTGGATTCACCTTCAGTAACTATGGCATGCACTGGGTCCGCCAGGCTCCAGGCAAGGGGCTGGAGTGGGTGGCAGCTATTTCATATGAAGGAAGTAATGAACACTATTTAGACTCCGTGAAGGGCCGATTCACCATCTCCAGAGACAATTACAAGAACACGCTGTATCTGCAAATGAACAGCCTGAGAGATGAGGACACCGCTGTCTATTACTGTGCGAACGGAGCAGTGGCTGGCGATGATGCTTTTGCTATCTGGGGCCAAGGGACAATGGTCACCGTCTCTTCA	GATGTTGTGATGACTCAGTCTCCACTCTCCCTGCCCGTCACCCCTGGACAGCCGGCCTCCATCTCCTGCAGGTCTAGTCAAAGCCTCGTATACAGTGATGGAAACACCTACTTGAATTGGTTTCACCAGAGGCCAGGCCAATCTCCAAGGCGCCTAATTTATAAGGTTTCGAAGCGGGACTCTGGGGTCCCAGACAGATTCAGCGGCAGTGGGTCAGGCACTGATTTCACACTGAAAATCAGCAGGGTGGAGGCTGAGGATGCTGGGGTTTATTACTGCATGCAAGGTACACACTGGCCCTGCACTTTTGGCCAGGGGACCAAGCTGGAGATCAAA
97	IML3694	Pre-vax	ADI-67686	IGHV2-5*02	IGHD3-3*01	IGHJ5*02	IGKV1-39*01	IGKJ2*01	5	3.2	S2	No						GTACACAAACGAGGTCTTCTGGAGAGGTCAAGGTTCGACCCC	VHKRGLLERSRFDP	CAACAGAGTTACAGTTCCCCGTACACT	QQSYSSPYT	CAGATCACCTTGAAGGAGTCTGGTCCTACGCTGGTGGAACCCACACAGACCCTCACGCTGACCTGCACCGTCACTGGGTTCTCACTCAGCAGTAATGGAGTGGCTGTGGGCTGGATCCGTCAGCCCCCAGGAAAGGCCCTGGAGTGGCTTGCACTCATTTATTGGGATGATGATAAGCGCTACAGTCCATCTCTGAAGAGCAGGCTCACCATCACCAAAGACACTTCCAAAAACCAGGTGGTCCTCATGATGACCAACATGGACCCTGAGGACACAGCCACATATTACTGTGTACACAAACGAGGTCTTCTGGAGAGGTCAAGGTTCGACCCCTGGGGCCAGGGAACCCTGGTCACCGTCTCCTCA	GACATCCAGATGACCCAGTCTCCATCTTCCCTGTCTGCATCTGTAGGAGACAGAGTCACCATCACTTGCCGGGCAAGTCAGAGTATTAGCAGCTATTTAAATTGGTATCAGCAGAAATCAGGGAAAGCCCCTAACCTCCTGATCTATGCTGCATCCGGTTTGCAAGGTGGGGTCCCATCAAGGTTCAGTGGCAGTGGATTTGGGACAGATTTCACTCTCACCATCAGCAGTCTGCAACCTGAAGATTTTGCAACTTATTACTGTCAACAGAGTTACAGTTCCCCGTACACTTTTGGCCAGGGGACCAAGCTGGAGATCAAA
98	IML3694	Pre-vax	ADI-67687	IGHV3-30-3*01	IGHD5-18*01	IGHJ4*02	IGKV1-5*03	IGKJ1*01	3.4	3.9	S2	No						GCGAGAAGTGACGGCTACAGCTTCTTTGACTAC	ARSDGYSFFDY	CTATACTATAAAAGTTATTGGACG	LYYKSYWT	CAGGTGCAGCTGGTGGAGTCTGGGGGAGGCGTGGTCAAGCCTGGGAGGTCCCTGAGACTCTCCTGTGCAGCCTCTGGATTCACCCTCAGTATCTATTCTATGCACTGGGTCCGCCAGGCTCCAGGCAAGGGGCTGGAGTGGGTGGCAGTTATATCATATGATGGAATCAATAAATACTACGCAGACTCCGTGAGGGGCCGATTCACCATCTCCAGAGACAATTCCAAGGACACACTGTATCTGCAAATGAACAGCCTGAGACCTGAGGACACGGCTGTGTATTATTGTGCGAGAAGTGACGGCTACAGCTTCTTTGACTACTGGGGCCAAGGAACCCTGGTCACCGTCTCCTCA	GACATCCAGATGACCCAGTCTCCTTCCACCCTGTCTGCATCTGTAGGAGACAGAGTCACCATCACTTGTCGGGCCAGTCAGAGTATTAATAGTTGGTTGGCCTGGTATCAGCAGAAACTAGGGAAAGCCCCTAAACTCCTGATCTCTAAGGCGTCTAGTTTAGAAAGTGGGGTCCCATCAAGGTTCAGCGGCAGTGGATCGGGGACAGAATTCACTCTCACCATCAGCAGCCTGCAGCCTGATGATTTTGCAACTTATTACTGCCTATACTATAAAAGTTATTGGACGTTCGGCCAAGGGACCAAGGTGGAAATCAAA
99	IML3694	Pre-vax	ADI-67689	IGHV3-13*01	IGHD1-20*01	IGHJ1*01	IGKV3-15*01	IGKJ4*01	7.2	3.1	Undefined	No						GCAAGAGGAAGGTCTTTAACTCAC	ARGRSLTH	CAGCAATATAATAACTGGCCTCCGGGAAAGCTCACT	QQYNNWPPGKLT	GAGGTGCAGCTGGTGGAGTCTGGGGGAGGCTTGGTACAGCCTGGGGGGTCCCTGAGACTCTCTTGTGTAGCCTCTGGATTCGCCTTCAGAAGTTACGACATGCACTGGGTTCGTCAATTACCAGGAAAAGGTCTGGAGTGGGTCTCAGCTATGGGTAACGCTGGTGACAAATATTATGCAGACTCTGTGAAGGGCCGATTCTCCATCTCCAGAGAAAATGCCAAGAACTCCTTGTATCTTCAAATGAACAGCCTGAGAGCCGGGGACACGGCTGTCTATTACTGTGCAAGAGGAAGGTCTTTAACTCACTGGGGCCAGGGCACCCTGGTCACCGTCTCCTCA	GAAATAGTGATGACGCAGTCTCCAGCCACCCTGTCCGTGTCTCCAGGGGAAAGAGTCACCCTCTCCTGCAGGGCCAGCCAGAGTGTTAGCAGCAACTTAGCCTGGTACCAGCAGAAGCCTGGCCAGGCTCCCAGGCTCCTCATCTATGGTACATCCATCAGGGCCACTGGTATCCCAGCCAGGTTCAGTGGCAGTGGGTCTGGGACAGAGTTCACTCTCACCATCAGCAGCCTACAGTCTGAAGATTTTGCAGTTTATTATTGTCAGCAATATAATAACTGGCCTCCGGGAAAGCTCACTTTCGGCGGAGGGACCAAGGTGGAGATCAAA
100	IML3694	Pre-vax	ADI-67690	IGHV3-9*01	IGHD3-22*01	IGHJ2*01	IGLV1-44*01	IGLJ3*02	4.7	5.1	RBD	No			>1.0	>1.0		GTAAAAGAGGAAGGATCCGAGAAGTATTACTATGATAGTAGTGGCCAAGGGTACTTCGACCTC	VKEEGSEKYYYDSSGQGYFDL	ACGACTTGGGATGGCAGCCTGCATGGTCATTGGGTG	TTWDGSLHGHWV	GAAGTGCAGCTGGTGGAGTCTGGGGGAGGCTTGGTACAGCCTGGCAGGTCCCTGAGACTCTCCTGTGCAGCCTTTGGATTCACCTTTGATGATTATGCCATGCACTGGGTCCGGCAAGCTCCAGGGAAGGGCCTGGAGTGGGTCTCAGGTATTAGTTGGAATAGCGGTACCATAGGCTATGTGGACTCAGTGCAGGGCCGATTCTTCATCTCCAGAGACAACGCCAAGAACTCCCTGTATCTACAAATGAACAATCTGAGACCTGAGGACACGGCCTTCTATTATTGTGTAAAAGAGGAAGGATCCGAGAAGTATTACTATGATAGTAGTGGCCAAGGGTACTTCGACCTCTGGGGCCGTGGCACCCTGGTCACTGTCTCCTCA	CAGTCTGTGCTGACTCAGCCACCCTCAGCGTCTGGGACCCCCGGGCAGAGGGTCACCATCTCTTGTTCTGGAAACAGCTCCAACATCGGAAGTAATCCTGTTAATTGGTACCAGCAGCTCCCAGGAACGGCCCCCAAACTCCTCATCTATCGGAATAATCAGCGGCCTTCAGGGGTCCCTGACCGATTCTCTGGTTCCAAGTCTGGCACCTCAGCCTCCCTGGCCATCAGTGGGCTCCAGTCTGAGGATGAGGCTGATTATTATTGTACGACTTGGGATGGCAGCCTGCATGGTCATTGGGTGTTCGGCGGAGGGACCAAGCTGACCGTCCTA
101	IML3694	Pre-vax	ADI-67692	IGHV1-2*02	IGHD2-15*01	IGHJ6*02	IGLV2-8*01	IGLJ2*01	4.1	2	Undefined	No						GCGAGAGACGGAAGGTCCGAAATTTCATATTGTAGTGGAGGAACCTGCCATTCCGAATATCAATACTACGCTATGCACGTC	ARDGRSEISYCSGGTCHSEYQYYAMHV	AGCTCATATGGAGGCAACAACAACCCCGTGGTA	SSYGGNNNPVV	CAGGTGCAGCTGGTGCAGTCTGGGGCTGAGGTGATGAAGCCTGGGGCCTCAGTGAAGGTCTCCTGCAAGGCTTCTGGATACACCTTCACCGCCTATTATTTACACTGGGTGCGGCAGGCCCCTGGACGAGGGCTTGAGTGGATGGGGTGGATCAACCCTAACAGTGGTGGCACAAACTATGCACAGAAGTTTCAGGGCCGGGTCACCATGACCAGGGACACGTCCAGCAGCACAGCCTCCATGGAGCTGAGCAGGCTGACATCTGACGACACGGCCGTGTATTACTGTGCGAGAGACGGAAGGTCCGAAATTTCATATTGTAGTGGAGGAACCTGCCATTCCGAATATCAATACTACGCTATGCACGTCTGGGGGCAAGGGACCACGGTCACCGTCTCC…	CAGTCTGCCCTGACTCAGCCTCCCTCCGCGTCCGGGTCTCCTGGACAGTCAGTCACCATCTCCTGCACTGGAACCAGCAGTGACGTTGGTGGTTATGACTATGTCTCCTGGTACCAACAGCACCCAGGCAAAGCCCCCAAAGTCATGATTTATGAGATCAGTAAGCGGCCCTCAGGGGTCCCTGATCGCTTCTCTGGCTCCAAGTCTGGCAACACGGCCTCCCTGACCGTCTCTGGGCTCCAGGCTGAGGATGAGGGTGATTATTACTGCAGCTCATATGGAGGCAACAACAACCCCGTGGTATTCGGCGGAGGGACCAAGCTGACCGTCCTA
102	IML3694	Pre-vax	ADI-67695	IGHV1-69*01	IGHD2-21*01	IGHJ6*02	IGKV3-11*01	IGKJ5*01	4.4	2.1	S2	No						GCGAGAATACTCGGGCATGAGTTGCTAAGAATACACGGTATGGACGTC	ARILGHELLRIHGMDV	CAGCAGCGTAGCAACTGGCCTCCTTCGATCACC	QQRSNWPPSIT	CAGGTGCAGCTGGTGCAGTCTGGGGCTGAGGTGAAGAAGCCTGGGTCCTCGGTGAAGGTCTCCTGCAAGGCCTCTGGAGACACCTTCAGCAGCTCCGCTATCACCTGGGTGCGACAGGCCCCTGGACAAGGCCTTGAGTGGATGGGAGGGATCATCCCTATCTTTGGTACAACAAACTATGCACAGAGGTTCCAGGGCAGAGTCACGATTACCGCGGACGAATCCACGAGGACAACCTACATGGAGCTGAGCAGCCTGAGGACTGAGGACACGGCCGTGTATTACTGTGCGAGAATACTCGGGCATGAGTTGCTAAGAATACACGGTATGGACGTCTGGGGGCAAGGGACCACGGTCACCGTCTCCTCA	GAAATTGTGTTGACACAGTCTCCAGCCACCCTGTCTTTGTCTCCGGGGGAAAGAGCCACCCTCTCCTGCAGGGCCAATCAGAGTATTAGCAACTTCTTAGCCTGGTACCAACAGAAACCTGGCCAGGCTCCCAGGCTCCTCATCTATGATGCTTCCAACAGGGCCACTGGCATCCCAGCCAGGTTCAGTGGCAGTGGGTCTGGGACAGACTTCACTCTCACCATCAGCAGCCTAGAGCCTGAAGATTTTGCAGTTTATTACTGTCAGCAGCGTAGCAACTGGCCTCCTTCGATCACCTTCGGCCAAGGGACACGACTGGAGATTAAA
103	IML3694	Pre-vax	ADI-67698	IGHV3-23*01	IGHD3-3*01	IGHJ4*02	IGKV1-33*01	IGKJ3*01	4.7	4.3	NTD	No						GCGAAAGTCCAGGACGATTTTTGGGGGGATTATTATGGTTCGTTTGACTAC	AKVQDDFWGDYYGSFDY	CAACAGTATGATAATCCCGGGGCATTCACT	QQYDNPGAFT	GAGGTGCAGCTGGTGGAGTCTGGGGGAGGCTTGGTACAGCCGGGGGGGTCCCTGAGACTCTCCTGTGCAGCCTCTGGATTCACCTTTGGCAACTATGCCATGAGCTGGGTCCGCCAGGCTCCAGGGAAGGGGCTGGAGTGGGTCTCAGTTATTAGTGGCAGTGCTGATAGCACATATTATGCAGACTCCGTGAAGGGCCGGTTCACCATCTCCAGAGACAATTCCAAGAACATGCTATATCTGCAAATGAGCAGCCTGAGAGCCGAGGACACGGCCATATATTACTGTGCGAAAGTCCAGGACGATTTTTGGGGGGATTATTATGGTTCGTTTGACTACTGGGGCCAAGGAACCCTGGTCACCGTCTCCTCA	GACATCCAGATGACCCAGTCTCCATCCTCCCTGTCTGCATCTGTAGGAGACAGAGTCACCATCACTTGCCAGGCGAGTCAGGACATTAGCAACTCTTTAAATTGGTATCAGCAAAAACCAGGGCAAGCCCCTAAGTTCCTGATCTTCGATGCATCCTTTTTGGAAACAGGGGTCCCGTCAAGGTTCAGTGGAAGTGGATCTGGGACAAATTTTACTTTCACCATAAGCAGCCTGCAGCCTGAAGATTTTGCTACATATTACTGTCAACAGTATGATAATCCCGGGGCATTCACTTTCGGCCCTGGGACCAAAGTGGATATCAAA
104	IML3694	Pre-vax	ADI-67699	IGHV3-9*01	IGHD1-26*01	IGHJ6*03	IGLV1-40*01	IGLJ7*01	3.4	2.4	RBD	No						GCAAAAGATTACTACAAAGATGACTACTACTACTACATGGACGTC	AKDYYKDDYYYYMDV	CAGTCCTATGACAGCAGCCTGAGTGGTCCTATAATA	QSYDSSLSGPII	GAAGTGCAGCTGGTGGAGTCTGGGGGAGGCTTGGTACAGCCTGGCAGGTCCCTGAGACTCTCCTGTGCAGCCTCTGGATTCACCTTTGATGATTATGCCATGCACTGGGTCCGGCAAGCTCCAGGGAAGGGCCTGGAGTGGGTCTCAGGTATTTATTGGAATAGTGGTGTCATGGGCTATGCGGACTCTGTGAAGGGCCGATTTATCATCTCCAGAGACAACGCCAAGAACTCCCTGTATCTGCAAATGAACAGTCTGAGACCTGAAGACACGGCCTTATATTACTGTGCAAAAGATTACTACAAAGATGACTACTACTACTACATGGACGTCTGGGGCAAAGGGACCACGGTCACCGTCTCCTCA	CAGTCTGTGCTGACGCAGCCGCCCTCAGTGTCTGGGGCCCCAGGGCAGAGGGTCACCATCTCCTGCACTGGGAGCAGCTCCCACATCGGGGCAGGTTATGATGTACACTGGTACCAGCACCTTCCAGGAACAGCCCCCAAACTGCTCATCTATGCTAACAACGATCGGCCCTCAGGGGTCCCTGACCGATTCTCTGGCTCCAAGTCTGGCACCTCAGCCTCCCTGGCCATCACTGGGCTCCAGCCTGAGGATGAGGCTGATTATTACTGCCAGTCCTATGACAGCAGCCTGAGTGGTCCTATAATATTCGGAGGAGGCACCCAGCTGACCGTCCTC
105	IML3694	Pre-vax	ADI-67701	IGHV4-61*11	IGHD3-9*01	IGHJ1*01	IGKV2-28*01	IGKJ1*01	3.3	0	S2	No						GCGAGAGATCGGCTCACGATATTTGGACTGGCCACCACGATCGGGGCTTCTACCCGGGCT	ARDRLTIFGLATTIGASTRA	ATGCAAGCTCTACAAACTCCTCCCACT	MQALQTPPT	CAGGTGCAGCTGCAGGAGTCGGGCCCAGGACTGGTGAGGCCTTCACAGACCCTGTCCCTCACCTGCACTGTCTCTGGTGACTCCGTCAGCAGTGGTAGTTATTACTGGAGCTGGATCCGGCAGCCCGCCGAGAAGGGACTGGAGTGGATTGGGCGAATCCATGCCAGTGGGAGCACCAACTACAACCTCTCCCTCAAGAGTCGAGTCACCATGTCAGTAGACACGTCCAAGAACCAGTTCTCCCTGAAGCTGAGCTCTGTGACCGCCGCAGACACGGCCGTATATTACTGTGCGAGAGATCGGCTCACGATATTTGGACTGGCCACCACGATCGGGGCTTCTACCCGGGCTTGGGGCCAGGGCACCCTGGTCACCGTCTCCTCA	GATATTGTGATGACTCAGTCTCCACTCTCCCTGCCCGTCACCCCTGGAGAGCCGGCCTCCATCTCCTGCAGGTCTAGTCAGAGCCTCCTGCATAGTAATGGATACAACTATTTGGATTGGTACCTGCAGAAGCCAGGGCAGTCTCCACAGCTCCTGATCTATTTGGGTTCTAATCGGGCCTCCGGGGTCCCTGACAGGTTCAGTGGCAGTGGATCAGGCACAGATTTTACACTGAAAATCAGCAGAGTGGAGGCTGAGGATGTTGGGGTTTATTACTGCATGCAAGCTCTACAAACTCCTCCCACTTTCGGCCAAGGGACCAAGGTGGAAATCAAA
106	IML3694	Pre-vax	ADI-67705	IGHV1-2*02	IGHD3-22*01	IGHJ6*03	IGKV3-20*01	IGKJ3*01	3.4	9.3	S2	No						GCGAGAGAGGCGACTATGATAGAAAACTACTACTACATGGACGTC	AREATMIENYYYMDV	CAGCTGTATGATAGGTTTATGTTCAAT	QLYDRFMFN	CAGGTGCAGCTGGTGCAGTCTGGGGCTGAGGTGAAGAAGCCTGGGGCCTCAGTGAAGGTCTCCTGCAAGGCTTCTGGATACACCTTCATCGGCTACTATATCCACTGGGTGCGACAGGCCCCTGGACAAGGGCTTGAGTGGATGGGATGGATCAACCCTAATAGTGGTGTCACAAATTATGCACAGAACTTTCACGGCAGGGTCACCATGACCAGGGACACGTCCATCAGCACAGCCTACATGGAACTGAGCAGGCTGGGATCTGACGACACGGGCGTGTATTACTGTGCGAGAGAGGCGACTATGATAGAAAACTACTACTACATGGACGTCTGGGGCAAAGGGACCACGGTCACCGTCTCCTCA	GAAATTGTGTTGACGCAGTCTCCCGGCACCCTGTTTTTGTTTCCAGGGGAAAGAGCCACCCTTTCCTGCAGGGCCAGTCAGAGTGTTAGCACCAGCAAATTAGCCTGGTACCAGCAGACACCTGGCCAGGGTCCCAGGGTCCTTATTTATGGTGCATCCAGCAGGGCCAATGGCCTTCCAGACAGGGTCAGGGGCAGGGGGTTTGGGACAGAATTCAATTTCACCATCAGCAGAATGGAGCCTGAAGATTTTGCAGTGTATTATTGTCAGCTGTATGATAGGTTTATGTTCAATTTCGGCCCTGGGACCAAAGTGGATATCAAA
107	IML3694	Pre-vax	ADI-67706	IGHV3-30*18	IGHD4-17*01	IGHJ3*02	IGLV2-14*03	IGLJ1*01	6.1	3.8	S2	No						GCGAAAGGCCCTGTCTACGGTGGCCTTCTAGGGTCC	AKGPVYGGLLGS	AACTCATATACAGGCAGCAGCACCCCCTATGTC	NSYTGSSTPYV	CAGGTGCAGCTGGTGGAGTCTGGGGGAGCCGTGGTCCAGCCTGGGAGGTCCCTGAGACTCTCCTGTGCAGCCTCTGGATTCACCTTCAGCAGTTATGGCATGCACTGGGTCCGCCAGGCTCCAGGCAAGGGCCTGGAGTGGATGGCAGTTATCTCATATGATGGAGGTACTAAATACTACGCAGACTCCGTGAGGGGCCGATTCACCATCTCCAGACACAATTCCAAGAACACCCTATATTTGCAAATGAATAGCCTGAGAGCTGAAGACACGGCTCTATATTACTGTGCGAAAGGCCCTGTCTACGGTGGCCTTCTAGGGTCCTGGGGCCAAGGGACAATGGTCACCGTCTCTTCA	CAGTCTGCCCTGACTCAGCCTGCCTCCGTGTCTGGGTCTCCTGGACAGTCGATCACCATCTCCTGCACTGGAACCAGCAGTGACGTTGGTGGTTATCACTATGTCTCCTGGTATCAACAATACCCAGGCAAAGCCCCCAAACTCATACTTTTTGATGTCGGTAGTCGGCCCTCAGGGGTTTCTCATCGCTTCTCTGGCTCCAAGTCTGGCAACACGGCCTCCCTGACCATCTCTGGGCTCCAGGCTGAGGACGAGGCTGATTATTACTGCAACTCATATACAGGCAGCAGCACCCCCTATGTCTTCGGAACTGGGACCAAGGTCACCGTCCTA
108	IML3694	Pre-vax	ADI-67707	IGHV3-30*18	IGHD3-10*01	IGHJ6*03	IGKV1-5*03	IGKJ1*01	9.9	6.3	Undefined	Yes						GCGAAACGGGGAGGCCCTTTTGAAATACGCGACTACTTCTACATGGACGTC	AKRGGPFEIRDYFYMDV	CAACAGTATAAGACTTATTCTCCCTGGGCG	QQYKTYSPWA	CAGGTGCAGCTGGTGGAGTCTGGGGGAGGCGTGGTTCAGCCTGGGACGTCCCTGAGACTCTCCTGTAGAGTCTCTGGATTCACCATGAACAACTATGGCATGTACTGGGTCCGCCAGGCTCCAGGCAAGGGGCTGGAGTGGGTGGCGACTATTTCATATGAAGGAAGTCTTGAAGACTATGGAGACTCGGTGAAGGGCCGATTCACCATCTCCAAAGACGATTCGAAGAAGACGGTGTATCTGCAAATGCACAGCCTGAGACCTGAGGACACGGCTGTGTATTACTGTGCGAAACGGGGAGGCCCTTTTGAAATACGCGACTACTTCTACATGGACGTCTGGGGCAAAGGGACCACGGTCACCGTCTCCTCA	GACATCCAGATGACCCAGTCTCCTTCCAGCCTGTCTGCATCTGTAGGAGACAGAGTCACCATCACTTGCCGGGCCAGTGAGAGTATTAGTGCCTACTTGGCCTGGTATCAGCAGAAACCAGGGAAAGCCCCCAACCTCCTGATCTACAAGGCGTCCAGTTTAAAGAGTGGGGTCCCATCACGGTTCAGCGGCAGTGGGTCTGGGACAGAATTCACTCTCACCATCAGCGGCCTGCAGCCAGATGATTTTGCAACTTATTACTGCCAACAGTATAAGACTTATTCTCCCTGGGCGTTCGGCCAAGGGACCAAGGTGGAAATCAAA
109	IML3694	Pre-vax	ADI-67710	IGHV3-49*03	IGHD3-10*01	IGHJ4*02	IGKV2D-30*01	IGKJ2*01	6.3	3	Undefined	No						ACTAGAGGGTATCGGTTCGGCTCTCATGACCTTGACTAC	TRGYRFGSHDLDY	ATGCAAGGTACACACTGGCCTCCCACT	MQGTHWPPT	GAGGTGCAGCTGGTGGAGTCTGGGGGAGGCTTCGTACAGACGGGGCGGTCCCTGAGACTCTCCTGTACAACTTCTGGATTCACCTTTGGTGATCATGCTATAAACTGGTTCCGCCAGTCTCCAGGGAAGGGACTGGAGTGGGTAGGTTTCATTAGAAGTAAAGCCTATGGTGGGACAACACAATGCGCCGCGTCTGTGAGAGACAGATTCACCATCTCCAGAGATGATTCCAACGGCATCGCCTATCTGCAAATGAACAGCCTGAAAACCGAGGACACAGCCGTCTATTACTGTACTAGAGGGTATCGGTTCGGCTCTCATGACCTTGACTACTGGGGCCAAGGAACCCTGGTCACCGTCTCCTCA	GATGTTGTGATGACTCAGTCTCCACTCTCCCTGCCCGTCACCCTTGGACAGCCGGCCTCCATCTCCTGCAGGTCTAGTCAAAGCCTCGTGTACGGTGATGGAAGCACCTACTTGAATTGGTTTCACCAGAGGCCAGGCCAATCTCCAAGGCGCCTAATTTATATGATTTCTAACTGGGGCTCTGGGGTCCCAGACAGATTCAGCGGCAGTGGGTCAGGCACTAATTTCACACTGAAAATCAGCAGGGTGGAGGCTGAGGATGCTGGGGTTTATTACTGCATGCAAGGTACACACTGGCCTCCCACTTTTGGCCAGGGGACCAAGCTGGAGATCAAA
110	IML3694	Pre-vax	ADI-67714	IGHV3-30-3*01	IGHD5-18*01	IGHJ4*02	IGKV1-5*03	IGKJ1*01	5.4	1.1	S2	No						GCGAGAAGTGACGGCTACAGCTTCTTTGACTAC	ARSDGYSFFDY	CAACAATATAATACTTATTGGACG	QQYNTYWT	CAGGTGCAGCTGGTGGAGTCTGGGGGAGGCGTGGTCAAGCCTGGGAGGTCCCTGAGACTCTCCTGTGCAGCCTCTGGATTCACCCTCAGTATCTATTCTATGCACTGGGTCCGCCAGGCTCCAGGCAAGGGGCTGGAGTGGGTGGCAGTTATATCATGTGAGGGAATCAATAGGGAGTACGCAGACTCCGTGAGGGGCCGATTCACCATCTCCAGAGACAATTCCAAGGACACACTGTATCTGCAAATGAACAGCCTGAGACCTGAGGACACGGCTGTGTATTATTGTGCGAGAAGTGACGGCTACAGCTTCTTTGACTACTGGGGCCAAGGAACCCTGGTCACCGTCTCCTCA	GACATCCAGATGACCCAGTCTCCTTCCACCCTGTCTGCATCTGTAGGAGACAGAGTCACCATCACTTGCCGGGCCAGTCAGAGTATTAGTACCTGGTTGGCCTGGTATCAGCAGAAACCAGGGAAAGCCCCTAAGCTCCTGATCTATAAGGCGTCTAGTTTAGAAAGTGGGGTCCCATCAAGGTTCAGCGGCAGTGGATCTGGGACAGAATTCACTCTCACCATCAGCAGCCTGCAGCCTGATGATTTTGCAACTTATTACTGCCAACAATATAATACTTATTGGACGTTCGGCCAAGGGACCAAGGTGGAAATCAAA
111	IML3694	Pre-vax	ADI-67717	IGHV3-30-3*01	IGHD1-26*01	IGHJ3*02	IGKV3-15*01	IGKJ1*01	4.4	2.1	S2	No						GCGAGAAGTCGAGGTGGAAACTACTTGGATGGTTTTGATATT	ARSRGGNYLDGFDI	CAGCAGTATACTTACTGGCACACT	QQYTYWHT	CAGGTGCAGCTGGTGGAGTCTGGGGGAGGCGTGGTCCAGCCTGGGAGGTCCCTGAGACTCTCCTGTGCAGCCTCTGGATTCATTTTCAATATTTATGCTATGCACTGGGTCCGCCAGGCTCCAGGCAAGGGGCTGGAGTGGGTGGCAGTTATTTCATATGATGGAGCCAATAAATACTACCCAGACTCCGTGAAGGGCCGATTCACCATCTCCAGAGACAATTCCAAGAACACGCTGGATCTGCAAATGAACAGCCTGGGAACTGACGACACGGCTGTGTATTACTGTGCGAGAAGTCGAGGTGGAAACTACTTGGATGGTTTTGATATTTGGGGCCAAGGGACAATGGTCACCGTCTCTTCA	GAAATAGTGATGACGCAGTCTCCAGCCACCCTGTCTGTGTCTCCAGGGGAAAGAGCCACCCTCTCCTGCAGGGCCAGTCAGAGTGTTAGCAGCAACTTGGCCTGGTACCAGCAGAAGCCTGGCCAGACTCCCAGGCTCCTCATCTATGGTGCATCCACCAGGGCCACTGGTATCCCAGCCAGGTTCAGTGGCAGTGGGTCTGGGACAGAGTTCACTCTCACCATCAGCAGCCTGCAGTCTGAAGATTTTGCAGTTTATTACTGCCAGCAGTATACTTACTGGCACACTTTCGGCCAAGGGACCAAGGTGGAAATCAAA
112	IML3694	Pre-vax	ADI-67721	IGHV4-31*03	IGHD3-22*01	IGHJ4*02	IGKV3-11*01	IGKJ1*01	3.4	2.8	S2	No						GCGAGAGGGAATTACTTTGATGGTGATGGGTATGTGGACTAC	ARGNYFDGDGYVDY	CACCAGCGTCGCAACTGGCCGTACACT	HQRRNWPYT	CAGGTGCAGCTGCAGGAGTCGGGCCCAGGACTGGTGAAGCCTTCACAGACCCTGTCCCTCACCTGCAGTGTCTCTGGTGGCTCCATCAGCAGTGGTGGCTACTACTGGAACTGGATCCGCCATCACCCAGGGAAGGGCCTGGAGTGGATTGGGTTCATCTATTACAGTGGCAACACCTACTACAGCCCGTCCCTCAAGAGTCGAGTTACCATATCACTAGACACGTCTAAGAACCACTTCTCCCTGAAGCTGAGCTCTGTGACTGCCGCGGACACGGCCGTGTATTACTGTGCGAGAGGGAATTACTTTGATGGTGATGGGTATGTGGACTACTGGGGCCAAGGAACCCTGGTCACCGTCTCCTCA	GAAATTGTGTTGACACAGTCTCCAGCCACCCTGTCTTTGTCTCCAGGGGAAAGAGCCACCCTCTCCTGCAGGGCCAGTCAGAGTGTTAGCAGCTACTTAGCCTGGTACCAACAGAAACCTGGCCAGGCTCCCAGGCTCCTCATCTATGGTGCATCCAACAGGGCCACTGGCATCCCAGCCAGGTTCAGTGGCAGTGGGTCTGGGACAGACTTCACTCTCATCATCAGCAGTCTGGAGCCTGAAGATTTTGCAATGTATTACTGTCACCAGCGTCGCAACTGGCCGTACACTTTCGGCCAAGGGACCAAGGTGGAAATCAAA
113	IML3694	Pre-vax	ADI-67722	IGHV4-34*01	IGHD2-2*01	IGHJ6*03	IGKV3-20*01	IGKJ1*01	13.3	4.5	RBD	No	0.007361	0.0282	0.2552	0.0122		GCTCGAGGGGTCCAAATTCCGGAGTATTGTAGTATGAACAACTGCCCAGTAAGCGACCACCACTACTTCTACATGGATGTC	ARGVQIPEYCSMNNCPVSDHHYFYMDV	CAGCAGTATGGAGGCTCACGCCCGTGGACG	QQYGGSRPWT	CAGGTGCAGCTACAACAGTGGGGCGCAGGACTGTTGAGGCCTTCGGAGACCCTGTCCCTCACCTGCGCTGTCGAAGGTGAGTCCTTCAATTCTTACTATTGGACCTGGATCCGCCAGCCGCCAGGGAAGCGCCTGGAGTGGATTGCAGAGATCCAGGTTGGTGAAGACATCACCTACAACCCGTCTCTCAAGAGTCGAGTCAGCATGTCATTCGACACGTCCAAGAAGCAGTTCTCCCTGAGGCTGACCTCTGTGACCGCCGCGGACACGGCAATTTATTACTGTGCTCGAGGGGTCCAAATTCCGGAGTATTGTAGTATGAACAACTGCCCAGTAAGCGACCACCACTACTTCTACATGGATGTCTGGGGCAAAGGGACCACGGTCACCGTCTCCTCA	GAAATTGTGTTGACGCAGTCTCCAGGCACCCTGTCTTTGTCTCCAGGGGAAAGCGCCACCCTCTCCTGCAGGGCCAGTCAGACTATTAGCAGCTACTACTTAGCCTGGTACCAGCAGAAGCCTGGCCAGGCTCCCAGGCTCCTCATCTATGGCGCATCCAGCAGGGCCACTGGCATCCCAGACAGGTTCAATGGCAGTGGGTCTGGGACAGACTTCACTCTCACCATCACGAGACTGGAGCCTGAAGATTTTGCAGTGTATCACTGTCAGCAGTATGGAGGCTCACGCCCGTGGACGTTCGGCCAAGGGACCAAGGTGGAAATCAAA
114	IML3694	Pre-vax	ADI-67723	IGHV1-69*01	IGHD5-18*01	IGHJ4*02	IGKV3-11*01	IGKJ4*01	6.1	1	S2	No						GCGAGGGAAAGGACATTAATACATGAAACGCCCGACTAT	ARERTLIHETPDY	CAGCAGCGTAGCAACTGGCCTCCGAAGCTCACT	QQRSNWPPKLT	CAGGTGCAGCTGGTGCAGTCTGGGGCTGAGGTGAAGAAGCCTGGGTCCTCAGTGAAGGTCTCCTGCAAGGCTTCTGGAGGCACCTTCAGCAACTCTGCTATCAGCTGGGTGCGACAGGCCCCTGGACAAGGGCTTGAGTGGATGGGAGGGATCATCCCTATCTTTGGTACAACAAGTTACGCACAGAATTTCCAGGGCAGAGTCACGATTACCGCGGACGAATCCGCGACCACAGGCTACATGGAACTGACCAACCTGAGATCTGAGGACACGGCCCTTTACTATTGTGCGAGGGAAAGGACATTAATACATGAAACGCCCGACTATTGGGGCCAAGGAACCCTGGTCACCGTCTCCTCA	GAAATTGTGTTGACACAGTCTCCAGCCACCCTGTCTTTGTCTCCAGGGGAAAGAGCCACCCTCTCCTGCAGGGCCAGTCAGAGTGTTAGCAGTTACTTAGCCTGGTACCAGCAGAAACCTGGCCAGCCTCCCAGGCTCCTCATCTATGATGCATCCAACAGGGCCACTGGCATCCCAGCCAGGTTCAGTGGCAGTGGGTCTGGGACAGACTTCACTCTCACCATCAGCAGCCTAGAGCCTGAAGATTTTGCAGTTTATTACTGTCAGCAGCGTAGCAACTGGCCTCCGAAGCTCACTTTCGGCGGAGGGACCAAGGTGGAGATCAAA
115	IML3694	Pre-vax	ADI-67725	IGHV3-30*18	IGHD3-3*01	IGHJ4*02	IGLV2-8*01	IGLJ2*01	4.7	1.4	S2	No						GCGAAAGGTCCCGATGTGCAGATTATAATACCACCAGCCTATCTTGACTAC	AKGPDVQIIIPPAYLDY	AACTCATATGCAGGCAGCAACAATTTGGTA	NSYAGSNNLV	CAGGTGCAGCTGGTGGAGTCTGGGGGAGGCGTGGTCCAGCCTGGGAGGTCCCTGAGACTCTCCTGTGCAGCCTCTGGATTCACCTTTAGTTTCTATGGCATGCACTGGGTCCGCCAGGCTCCAGGCAAGGGGCTGGAGTGGGTGGCGGCCATATCGTATGATGGAAGTAATGAATACTATGGAGACTCCGTGAAGGGCCGATTCACCATCTCCAGAGACAATTCCAAGAAAATGCTGTCTCTGCAAATGAACAGCCTGAGAGCTGAGGACACGGCTCTATATTACTGTGCGAAAGGTCCCGATGTGCAGATTATAATACCACCAGCCTATCTTGACTACTGGGGCCAAGGAACCCTGGTCACCGTCTCCTCA	CAGTCTGCCCTGACTCAGCCTCCCTCCGCGTCCGGGTCTCCTGGACAGTCAGTCACCATCTCCTGCACTGGAACCAGCAGTGACGTTGGTGGTTATAACTATGTCTCCTGGTACCAACAGCACCCAGGCAAAGCCCCCAAACTCATGATTTATGAGGTCACTAAGCGGCCCTCAGGGGTCCCTAATCGCTTCTCTGGCTCCAAGTCTGGCAACACGGCCTCCCTGACCGTCTCTGGGCTCCAGGCTGAGGATGAGGCTAATTATTACTGCAACTCATATGCAGGCAGCAACAATTTGGTATTCGGCGGAGGGACCAAGCTGACCGTCCTA
116	IML3694	Pre-vax	ADI-67726	IGHV1-8*01		IGHJ6*03	IGKV2-28*01	IGKJ4*01	3.1	2	RBD	No		0.0258		0.0235		GCGACCAAACGGGTCCAGGTGCCTCGAAGATACTACTACTACATGGACCTC	ATKRVQVPRRYYYYMDL	ATGCAATCTCTACAAACTCCGCTCACT	MQSLQTPLT	CAGGTGCAGCTGGTGCAGTCTGGGGCTGAGGTGAAGAAGCCTGGGGCCTCAGTGAAGGTCTCCTGCAAGGCTTCCGGATACACCTTCACCAGTTATGAAATCAACTGGGTGCGACAGGCCACTGGACAAGGGCTTGAGTGGATGGGACGGATGAACCCTAACAGTGGTTACACAGACTACGCACAGAAGTTCCAGGGCAGACTCACCTTGACCAGGAACACCTCCATAAGCACAGCCTACATGGAGCTGAGCAGACTGAGATCTGAGGACACGGCCGTGTATTACTGTGCGACCAAACGGGTCCAGGTGCCTCGAAGATACTACTACTACATGGACCTCTGGGGCAAAGGGACCACGGTCACCGTCTCCTCA	GATATTGTGATGACTCAGTCTCCACTCTCCCTGCCCGTCACCCCTGGAGAGCCGGCCTCCATCTCCTGCAGGTCTAGTCAGAGCCTCCTGCATAGTCATGGATACAACTATTTGGATTGGTACCTGCAGAAGCCAGGGCAGTCTCCACACCTCTTGATCTATATGGGGTCTAATCGGGCCTCCGGGGTCCCTGACAGGTTCAGTGGCAGTGGATCAGGCACAGATTTTACACTGAAAATCAGCAGAGTGGAGGCTGAGGATGTTGGGGTTTATTACTGCATGCAATCTCTACAAACTCCGCTCACTTTCGGCGGAGGGACCAAGGTGGAGATCAAA
117	IML3694	Pre-vax	ADI-67728	IGHV4-59*01		IGHJ6*02	IGKV3-20*01	IGKJ1*01	3.1	3.1	S2	No						GCGAGAGGCTTCGACTTC	ARGFDF	CAGCAGTATGGTAGCTCACCATGGACG	QQYGSSPWT	CAGGTGCAGCTGCAGGAGTCGGGCCCAGGACTAGTGAAGCCTTCGGAGACCCTGTCCCTCACCTGCACTGTCTCTGGTGACTCCATCAGTCCTTACTACTGGAGCTGGATCCGGCAGCCCCCAGGGAAGGGACTGGAGTGGATTGGGTATATCTTTTCCAGTGGGAGCACCAACTACAACCCCTCCCTCAAGAGTCGAGTCACCATATCACTAGACACGTCCAAGAACCAGTTCTCCCTCAAGCTGAGCTCTGTGACCGTTGCGGACACGGCCGTGTATTACTGTGCGAGAGGCTTCGACTTCTGGGGGCAAGGGACCACGGTCACCGTCTCCTCA	GAAATTGTGTTGACGCAGTCTCCAGGCACCCTGTCTTTGTCTCCAGGGGAAAGAGCCACCCTCTCCTGCAGGGCCAGTCAGAGTATTGGCAGCAGCTACTTAGCCTGGTACCAGCAGAAACCTGGCCAGGCTCCCAGGCTCTTCATCTATGCTGCGTCCAGCAGGGCCATTGGCATCCCAGACAGATTCAGTGGCAGTGGGTCTGGGACAGACTTCAGTCTCACCATCAGCAGCCTGGAGCCTGAAGATTTTGCAGTGTATTACTGTCAGCAGTATGGTAGCTCACCATGGACGTTCGGCCAAGGGACCAAGGTGGAAATCAAA
118	IML3694	Pre-vax	ADI-67730	IGHV4-59*01	IGHD3-9*01	IGHJ3*02	IGKV1-39*01	IGKJ3*01	5.8	3.5	Undefined	No		>1.0		>1.0		GCGAGACAGTCTCAGGGCCCCTACGATTTTCTGACTGGTAAAATTTATGATGCTTTTGATATC	ARQSQGPYDFLTGKIYDAFDI	CAACAGAGTTACAGTACCCCTCAGACT	QQSYSTPQT	CAGGTGCAGCTGCAGGAGTCGGGCCCAGGACTGGTGAAGCCTTCGGAGACCCTGTCCCTCACCTGCACTGTCTCTGGTGGCTCCATCAAGACTTACTACTGGGCCTGGATCCGGCAGCCCCCAGGGAGGGGACTGGAGTGGATTGGATATATCTATTACAGTGAGACCACCAATTTCAACCCATCCCTCAAGAGTCGAGTCACCATGTCATTTGACACGTCCAAGAACCAGTTCTCTATGAAGCTGAGCTCTGTGACCGCTGCGGACACGGCCGTGTATTACTGTGCGAGACAGTCTCAGGGCCCCTACGATTTTCTGACTGGTAAAATTTATGATGCTTTTGATATCTGGGGCCAAGGGACAATGGTCACCGTCTCTTCA	GACATCCAGATGACCCAGTCTCCATCCTCCCTGTCTGCATCTGTAGGAGACAGAATCACCATCACTTGCCGGGCAAGTCAGAGCATTAGTAAATTTTTAAATTGGTATCAGCAGAAACCAGGGAAAGCCCCTAAGCTCCTGATCTATGCTGCATCCAGTTTGCAAAGTGGGGTCCCATTAAGGTTCAATGCCAGTGGATCTGGGACAGATTTCACTCTCACCATCAGCAGTCTACAACCTGAAGATTTTGCAATTTACTACTGTCAACAGAGTTACAGTACCCCTCAGACTTTCGGCCCTGGGACCAAAGTGGATATCAAA
119	IML3694	Pre-vax	ADI-67731	IGHV3-48*01	IGHD3-22*01	IGHJ6*02	IGKV1-17*01	IGKJ4*01	3.7	2.5	NTD	No		>1.0				GCGGGATCCAATTACTATGATGGTAATGGTCCTGACTAC	AGSNYYDGNGPDY	CTACAGTATAATACTTACCCCTCGCTCACT	LQYNTYPSLT	GAGGTGCAGCTGGTGGAGTCTGGGGGAGGCTTGGTACAGCCTGGGGGGTCCCTGAGACTCTCCTGTGCAGCCTCTGGATTCATGTTCAATATACATAACATGAACTGGGTCCGCCAGGCTCCAGGGAAGGGGCTGGAGTGGGTTTCATACATTAGTGGTAGTAGTAGTACCATGTACTACGCAGACTCTGTGAAGGGCCGATTCACCATCTCCAGAGACAATGCCAAGAACTCACTGTATCTGCAAATGAACAGCCTGAGAGCCGAGGACCCGGCTGTGTATTACTGTGCGGGATCCAATTACTATGATGGTAATGGTCCTGACTACTGGGGGCAAGGGACCACGGTCACCGTCTCCTCA	GACATCCAGATGACCCAGTCTCCATCCTCCCTGTCTGCATCTGTAGGAGACAGAGTCACTATCACTTGCCGGCCAAGTCAGGGCATTAGAAATGATTTAGGCTGGTATCAGCAGAAACCAGGGAAAGCCCCTAAGCGCCTGATCTATGCTGCATCCAGTTTGCAAAGTGGGGTCCCATCAAGATTCAGCGGCAGTGGATCTGGGACAGAATTCACTCTCACAATCAGCAGCCTGCAGCCTGAAGATTTCGCGACTTATTACTGTCTACAGTATAATACTTACCCCTCGCTCACTTTCGGCGGAGGGACCAAGGTGGAGATCAAA
120	IML3694	Pre-vax	ADI-67732	IGHV4-4*02	IGHD2-8*01	IGHJ6*02	IGKV2-24*01	IGKJ2*01	6.8	3.8	Undefined	No						GCGACTAAGAATGGGGAAAACTACGACTACGCTATGGACGTC	ATKNGENYDYAMDV	ATGCAAGGTACTCGGGGATCCACT	MQGTRGST	CAGGTGCAGCTGCAGGAGTCGGGCCCAGGACTGGTGGAGCCTTCGGGGACCCTGTCCCTCACCTGCGTTGTCTCTGGTGCCTCCATCGGCAGGAATATTTGGTGGAGTTGGGTCCGCCAGCCCTCAGGGAAGGGGCTGGAGTGGATTGGGGAAATCTATCACACTGGGGACACCAACTACAACCCGTCCCTCAAGAGTCGAGTCACCATATCACTAGACAAGTCCAAGAATAACTTCTCCCTGAAGGTGACCTCTGTGACCGCCGCCGACACGGCCGTGTATTACTGTGCGACTAAGAATGGGGAAAACTACGACTACGCTATGGACGTCTGGGGGCAAGGGACCACGGTCACCGTCTCCTCA	GATATTGTGATGACCCAGACTCCACTCTCCTCACCTGTCACCCTTGGACAGCCGGCCTCCATCTCCTGCAGGTCTAGTCAAAGCCTCCTACACAGTAATGGAAACACCTACTTGAGTTGGCTTCACCAGAGGCCAGGCCAGCCTCCAAGACTCCTAATTTATAAAGTTTCTAACCTCTTGTCTGGGGTCCCAGACAGATTCCGTGGCAGTGGGGCAGGGACAGATTTCACACTGAAAATCAGCAGGGTGGAAGCCGAGGATGTCGGGGTTTATTACTGCATGCAAGGTACTCGGGGATCCACTTTTGGCCAGGGGACCAAGCTGGAGATCAAA
121	IML3694	Pre-vax	ADI-67737	IGHV3-9*01	IGHD6-6*01	IGHJ6*03	IGLV2-23*02	IGLJ1*01	4.1	2.7	Undefined	No						GCAAGAGAGGGGTACAGCAGCTCGCCCCTCTTCTACTACTACTACATGGACGTC	AREGYSSSPLFYYYYMDV	TCATATGCAGGTAGGAACACTTTCCTTTATGTC	SYAGRNTFLYV	GAAGTGCAGCTGGTGGAGTCTGGGGGAGGCTTGGTGCAGCCTGGCAGGTCCCTGAGACTCTCCTGTGCAGCCTCTGGATTCTCCTTTGACGATTATGCCATGCACTGGGTCCGGCAAGTTCCAGGGAAGGGCCTGGAGTGGGTCTCAGGTATTAGTTGGAATAGTGGTAGTATAGGGTATGCGGACTCTGTGAAGGGCCGATTCACCATCTCCAGAGACAACGCCCAGAACTCCCTGTATCTGCAAATGAACAGTCTGAGAACTGAGGACACGGCCTTCTACTTCTGTGCAAGAGAGGGGTACAGCAGCTCGCCCCTCTTCTACTACTACTACATGGACGTCTGGGGCAAAGGGACCACGGTCACCGTCTCCTCA	CAGTCTGCCCTGACTCAGCCTGCCTCCGTGTCTGGGTCTCCTGGACAGTCGATCACCATCTCCTGCACTGGAACCAGCAGTGATGCTGGGAATTATAACCTTGTCTCCTGGTACCAACAGCTCCCAGGCAAAGCCCCCAAACTCATGATTTATGAAGTCAGTAAGCGGCCCTCAGGGGTTTCTAATCGCTTCTCTGGCTCCAAGTCTGACAACACGGCCTCCCTGACAATCTCTGGGCTCCAGACTGAGGACGAGGCTGATTATTACTGCTGCTCATATGCAGGTAGGAACACTTTCCTTTATGTCTTCGGAACTGGGACCAAGGTCACCGTCCTA
122	IML3694	Pre-vax	ADI-67741	IGHV3-15*01	IGHD6-19*01	IGHJ6*03	IGKV3D-20*01	IGKJ2*01	4.7	2.1	S2	No		>1.0	>1.0	0.956		ACCACACTTTCAGGATCTTCACAGTATAGCAGTGGCTGGTACTACTACTTCTATTACATGGACGTC	TTLSGSSQYSSGWYYYFYYMDV	CAGCACTATGGTAGCTCACCCCCGTACACT	QHYGSSPPYT	GAGGTGCAGCTGGTGGAGTCTGGGGGAGGCTTGGTAAGGCCTGGGGGGTCCCTTAGACTCTCCTGTGCAGCCTCTGGAATCACTTTCACCAACACGTGGATGAACTGGGTCCGCCAGGCTCCAGGGAAGGGGCTGGAATGGGTTGGCCGTATTAAAAGCAAAACTCATGGTGGGACAACGGACTACGGTGCACCCGTGAAAGGCAGATTCACCATCTCCAGAGATGATTCAAAAAACACGCTGTTTCTGCAATTGAACAGCCTGAAAACCGAGGACACAGCCGTGTATTACTGTACCACACTTTCAGGATCTTCACAGTATAGCAGTGGCTGGTACTACTACTTCTATTACATGGACGTCTGGGGCAAAGGGACCACGGTCACCGTCTCCTCA	GAAATTGTGTTGACGCAGTCTCCAGCCACCCTGTCTTTGTCTCCAGGGGAAAGAGCCACCCTCTCCTGCGGGGCCAGTCAGAGTGTTAGCAGCAGCTACTTGGCCTGGTACCAGCAGAAACCTGGCCTGGCGCCCAGGCTCCTCATCTATGATACATCCACCAGGGCCACTGGCATCCCAGACAGGTTCAGTGGCAGTGGGTCTGGGACAGACTTCACTCTCACCATCAGCAGACTGGAGCCTGAAGATTGTGCAGTGTATTACTGTCAGCACTATGGTAGCTCACCCCCGTACACTTTTGGCCAGGGGACCAAGCTGGAGATCAAA
123	IML3694	Pre-vax	ADI-67742	IGHV3-23*01	IGHD3-9*01	IGHJ6*02	IGLV2-14*03	IGLJ1*01	5.8	2.4	Undefined	No						GCGAAAGGGCTCGCTTACGATATTCTGAACTCCCATAACTACAGGTACTACGGTTTGGACGTC	AKGLAYDILNSHNYRYYGLDV	AGCTCATATAGAACCAATAGTCCTTATGTC	SSYRTNSPYV	GAGGTGCAGCTGTTGGAGTCTGGGGGAGGCGTGGTGCAGCCTGGGGGGTCCCTGAGACTCTCCTGTGCAGCCTCTGGATTCACTTTTAGCAACTCTGCCATGAGCTGGGTCCGCCAGGCTCCAGGGAAGGGGCTGGAGTGGGTCTCAGCCATTAGTGGCAGTGGTGGTAAGACATACTACGCAGAGACCGTGAAGGGCCGGTTCACCAGTTCCAGAGACAATTCCAAGAACACGCTGTATCTACAAATGAACACCCTGAGAGCCGAGGACACGGCCCTATATTTCTGTGCGAAAGGGCTCGCTTACGATATTCTGAACTCCCATAACTACAGGTACTACGGTTTGGACGTCTGGGGGCAAGGGACCACGGTCACCGTCTCCTCA	CAGTCTGCCCTGACTCAGCCTGCCTCCGTGTCTGGGTCTCCTGGACAGTCGATCACCATCTCCTGCACTGGAACCAGCAGTGACATTGGTGGTTATAACTATGTCTCCTGGTACCAACACCACCCAGGCAAAGCCCCCAAACTCATGATTTATGATGTCAGTAACCGGCCCTCAGGGGTTTCTGATCGCTTCTCTGGCTCCAAGTCTGGCTACACGGCCTCCCTGACCATCTCTGGGCTCCAGGCTGAGGACGAGGCTGATTATTACTGCAGCTCATATAGAACCAATAGTCCTTATGTCTTCGGAACTGGGACCAAGGTCACCGTCCTA
124	IML3694	Pre-vax	ADI-67743	IGHV4-4*02	IGHD2-8*01	IGHJ6*02	IGKV2-24*01	IGKJ1*01	6.8	3.8	Undefined	No						GCGACTAAGAATGGGGAAAACTACGACTACGCTATGGACGTC	ATKNGENYDYAMDV	ATGCAAGGTACTCGGGGATCCACT	MQGTRGST	CAGGTGCAGCTGCAGGAGTCGGGCCCAGGACTGGTGGAGCCTTCGGGGACCCTGTCCCTCACCTGCGTTGTCTCTGGTGCCTCCATCGGCAGGAATATTTGGTGGAGTTGGGTCCGCCAGCCCTCAGGGAAGGGGCTGGAGTGGATTGGGGAAATCTATCACACTGGGGACACCAACTACAACCCGTCCCTCAAGAGTCGAGTCACCATATCACTAGACAAGTCCAAGAATAACTTCTCCCTGAAGGTGACCTCTGTGACCGCCGCCGACACGGCCGTGTATTACTGTGCGACTAAGAATGGGGAAAACTACGACTACGCTATGGACGTCTGGGGGCAAGGGACCACGGTCACCGTCTCCTCA	GATATTGTGATGACCCAGACTCCACTCTCCTCACCTGTCACCCTTGGACAGCCGGCCTCCATCTCCTGCAGGTCTAGTCAAAGCCTCCTACACAGTAATGGAAACACCTACTTGAGTTGGCTTCACCAGAGGCCAGGCCAGCCTCCAAGACTCCTAATTTATAAAGTTTCTAACCTCTTGTCTGGGGTCCCAGACAGATTCCGTGGCAGTGGGGCAGGGACAGATTTCACACTGAAAATCAGCAGGGTGGAAGCCGAGGATGTCGGGGTTTATTACTGCATGCAAGGTACTCGGGGATCCACTTTCGGCCAAGGGACCAAGGTGGAAATCAAA
125	IML3694	Pre-vax	ADI-67744	IGHV3-9*01	IGHD6-13*01	IGHJ6*02	IGKV1-39*01	IGKJ1*01	3.4	3.9	RBD	No	0.007483	0.0154	0.0272	0.0102	0.01366	GCAAAAGGAAAGGCAGCTGGCCACTCCTACTATTACGGTATGGACGTC	AKGKAAGHSYYYGMDV	CAACAGAGTTACGTTACCCCGTGGACG	QQSYVTPWT	GAAGTGCAGCTGGTGGAGTCTGGGGGAGGCTTGGTACAGCCTGGCAAGTCCCTGACACTCTCATGTGCAGCCTCTGGATTCACCTTTGAGGATTATGCCATGTATTGGGTCCGGCAAGCTCCAGGGAAGGGCCCGGAGTGGGTCTCAGGTATTAGTTGGCATAGTGGTAGCATAGACTATGCGGACTCTGTGAAGGGCCGATTCACCATCTCCAGAGACAACGCCAAGAACTCCCTGTATCTGCAAATGAACAGTCTGAGAGCTGAGGACACGGCCTTGTATCACTGTGCAAAAGGAAAGGCAGCTGGCCACTCCTACTATTACGGTATGGACGTCTGGGGGCAAGGGACCACGGTCACCGTCTCCTCA	GACATCCAGATGACCCAGTCTCCTTCCTCCCTGTCTGCATCTGTAGGAGACAGAGTCACCATCACTTGCCGGGCAAGTCAGAGCATTAGCGGCTTTTTAAATTGGTATCAGCAGAAACCAGGGAGAACCCCTGAGGTCCTGATCTATGCTGCATCCAGTTTGCAAAGTGGGGTCCCATCTAGGTTCAGTGGCAGTGAATCTGGGACAGATTTCACTCTCACCATCAGCAGTCTGCAACCTGAAGATTTTGCAACTTACTACTGTCAACAGAGTTACGTTACCCCGTGGACGTTCGGCCAAGGGACCAAGGTGGAAATCAAA
126	IML3694	Pre-vax	ADI-67746	IGHV3-13*01	IGHD3-10*01	IGHJ6*03	IGKV1-39*01	IGKJ4*01	4.1	2.5	S2	No		>1.0				ACAAGAGGGGGGGCGACCTATGATTCGGGGGGTTCCCAAGTCCCTTTCTACTTCTACTACTACATGGACGTC	TRGGATYDSGGSQVPFYFYYYMDV	CAACAGAGTTACAGTATGCCTGAGCTCACT	QQSYSMPELT	GAGGTGCAGCTGGTGGAGTCTGGGGGAGGCTTGGTACAGCCTGGGGGGTCCCTGAGACTCTCCTGTGTAGCCTCTGGATTCACCTTCAGTACCTACGACATGCACTGGGTCCGCCAAACTACAGGAAAAGGTCTGGAGTGGGTCTCCACTATTGGTACTGCTGGTGACACATACTATCTAGAGTCCGTGAAGGGCCGATTCACCATCTCCAGAGAAAATGCCGAGAACTCCTTGTCTCTTCAAATGAACAGCCTGAGAGCCGGGGACACGGCTGTGTACTACTGTACAAGAGGGGGGGCGACCTATGATTCGGGGGGTTCCCAAGTCCCTTTCTACTTCTACTACTACATGGACGTCTGGGGCAAAGGGACCACGGTCACCGTCTCCTCA	GACATCCAGATGACCCAGTCTCCATCCTCCCTGTCTGCATCTGTAGGAGACAGAGTCACCATCTCTTGCCGGGCAAGTCAGAGCATTAGCAGCTATTTAAATTGGTATCAGCAGAAACCAGGGAAAGCCCCTAAGCTCCTGATCTATGCTGCATCAAATTTGCAGAGTGGGGTCCCATCAAGGTTCAGTGGCGGTGGATCTGGGACAGATTTCACTCTCACCATCAGCAGTCTGCAACCTGAAGATTTTGCAACTTACTACTGTCAACAGAGTTACAGTATGCCTGAGCTCACTTTCGGCGGAGGGACCAAGGTGGAGATCAAA
127	IML3694	Pre-vax	ADI-67747	IGHV4-59*01	IGHD2-2*02	IGHJ3*02	IGKV1-39*01	IGKJ2*01	5.8	2.8	Undefined	No		0.8738	>1.0	0.522		GCGAGAAGGGGTTTAGGATATTGTAGCACTACCAGATGTTATAGTGCTTTTGATATC	ARRGLGYCSTTRCYSAFDI	CAACAGAGTTACAGTCCCCCGTACACT	QQSYSPPYT	CAGGTGCAGCTGCAGGAGTCGGGCCCAGGACTGGTGAAGCCTTCGGAGACCCTGTCCCTCACCTGCACTGTCTCCGGTGCCTCCATCAGTCGTTACTACTGGAGCTGGATCCGGCAGACCCCAGGGAAGGGACTGGAGTGGATGGGGTGTATCCATGACAGTGGGAGCACCAACTACAACCCCTCCCTCGAGAGTCGGGTCACCATATCACGAGACACGCCCAAGAACCAGTTCTCCCTGAACTTGAGCTCTGTCACCGCTTCGGACACGGCCGTGTATTACTGTGCGAGAAGGGGTTTAGGATATTGTAGCACTACCAGATGTTATAGTGCTTTTGATATCTGGGGCCAAGGGACAATGGTCACCGTCTCTTCA	GACATCCAGATGACCCAGTCTCCATCCTCCCTGTCTGCATCTGTAGGAGACAGAGTCACCATCACTTGCCGGGCAAGTCAGAGCATTAACAACTATTTAAATTGGTATCAGCAGAAACCAGGGAAAGTCCCTAACCTCCTGATCTATGGTGCATCCAGTTTGCAAAGTGGGGTCCCATCAAGGTTCAGTGGCAGTGGATCTGGGACAGATTTCACTCTCACCATCAACAGTCTGCAACCTGAAGATTTTGCAAGTTACTACTGTCAACAGAGTTACAGTCCCCCGTACACTTTTGGCCAGGGGACCAAGCTGGAGATCAAA
128	IML3694	Pre-vax	ADI-67748	IGHV4-31*03	IGHD2-8*01	IGHJ4*02	IGKV5-2*01	IGKJ1*01	5.7	1.1	RBD	No	0.003785	0.0082	0.0322	0.0431	4.405	GCCAGATCCCCTGTAATCTACGGTACTAATTCCGGCTTTGACTAC	ARSPVIYGTNSGFDY	TGTCTACAACATGATAATTTCCCGTACACT	CLQHDNFPYT	CAGGTGCAGCTGCAGGAGTCGGGCCCAGGACTGGTGAAGCCTTCACAGACCCTGTCCCTCACCTGCACTGTCTCTGGTGACTCCATCTACAGTGGTACTTACTACTGGAACTGGATCCGCCAGCACCCAGGGCAGGGCCTGGAGTGGATTGGGTACATCCTTTACAGTGGGAGCACCTACTTCAACCCGTCCCTCAAGAGTCGAGTTACCATGTCGATAGACACGTCTAAGAAGCAGTTCTCCCTGAGGCTGAGCTCTGTGACTGCCGCGGACACGGCCGTTTATTACTGTGCCAGATCCCCTGTAATCTACGGTACTAATTCCGGCTTTGACTACTGGGGCCAAGGAACCCTGGTCACCGTCTCCTCA	GAAACGACACTCACGCAGTCTCCAGCATTCTTGTCAGCGACTCCAGGAGACAAAGTCAACATCTCCTGCAAAGCCAGCCAAGACATTGATGCTGCTATGAACTGGTACCAACAGAAACCAGGAGAAGCTGCTATTTTCATTATTCAAGAAGCTACTACTCTCGTTCCTGGAATCCCACCTCGATTCAGTGGCAGCGGGTATGGAACAGATTTTACCCTCACAATTAATAACATAGAATCTGAGGATGCTGCATATTACTTCTGTCTACAACATGATAATTTCCCGTACACTTTCGGCCAAGGGACCAAGGTGGAAATCAAA
129	IML3694	Pre-vax	ADI-67750	IGHV4-31*03	IGHD2-2*01	IGHJ6*02	IGLV1-51*01	IGLJ2*01	3.4	0.3	Undefined	No						GCGAGAGCAGAGTACTTGGGCCACTACTACTTCTACGGTATGGACGTC	ARAEYLGHYYFYGMDV	ACATGGGATAGCAGCCTGAGTGCCGTGGTT	TWDSSLSAVV	CAGGTGCAGCTGCAGGAGTCGGGCCCAGGACTGGTGAAGCCTTCACAGACCCTGTCCCTCAGCTGCACTGTCTCTGGTGGCTCCATCGTCAGTGGTGGTTACTACTGGAGCTGGATCCGGCAGCACCCAGGGAAGGGCCTGGAGTGGATTGGGAACATCTATTACAGTGGCAGCCCCTACTACAACCCGTCCCTCAAGAGTCGAGTTAACATATCAGTAGACACGTCTAAGAACCAGTTCTCCCTGAAACTGACCTCTGTGACTGCCGCGGACACGGCCGTGTATTACTGTGCGAGAGCAGAGTACTTGGGCCACTACTACTTCTACGGTATGGACGTCTGGGGGCAAGGGACCACGGTCACCGTCTCCTCA	CAGTCTGTGTTGACGCAGCCGCCCTCAGTGTCTGCGGCCCCAGGACAGAAGGTCACCATCTCCTGCTCTGGAAGCAGCTCCAACATTGGGAATAATTATGTATCCTGGTACCAGCAGCTCCCAGGAACAGCCCCCAAACTCCTCATTTATGACAATGATAAGCGACCCTCAGGGATTCCTGACCGATTCTCTGGCTCCAAGTCTGGCACGTCAGCCACCCTGGGCATCACCGGACTCCAGACTGGGGACGAGGCCGATTATTACTGCGGAACATGGGATAGCAGCCTGAGTGCCGTGGTTTTCGGCGGAGGGACCAAGCTGACCGTCCTA
130	IML3694	Pre-vax	ADI-67752	IGHV4-61*11	IGHD3-9*01	IGHJ4*02	IGKV4-1*01	IGKJ1*01	6.4	2	NTD	No						GCGAGAGAAACTTTGACTGGTGATTATAACTCCCCCTTTGACCAC	ARETLTGDYNSPFDH	CAGCAATATTATAATACTCCTCGGACG	QQYYNTPRT	CAGGTGCAGCTGCAGGAGTCGGGCCCAGGACTGGTGAAGACTTCACAGACCCTGTCCCTCACCTGCACTGTCTCTGGTGGCTCCATTGGCAGTGGTACTTACTACTGGACCTGGATCCGGCAGCCCGCCGGGAAGGGACTGGAATACATTGGGCGTATCTATACCAATGGGAACACCCATTACAACCCCTCCCTCAAGAGTCGAGTCGCCGTCTCAGTAGACACGTCCAAGAACCAGTTCTCCCTGAGGCTGAGGTCTGTGTCCGCCGCAGACACGGCCGTATATTACTGTGCGAGAGAAACTTTGACTGGTGATTATAACTCCCCCTTTGACCACTGGGGCCAGGGCACCCTGGTCACCGTCTCCTCA	GACATCGTGATGACCCAGTCTCCAGACTCCCTGGCTGTCTCTCTGGGCGAGAGGGCCACCATCAACTGCAAGTCCAGCCAGAGTGTTTTATTCACCTCCAACAATAAGAACTACTTAGCTTGGTACCAGCAGAAGCCAGGACAGCCTCCTAAGCTGCTCGTTTACTGGGCATCTACCCGGGAATCCGGGGTCCCTGACCGATTCAGTGGCAGCGGGTCTGGGACAGATTTCACTCTCACCATCAGCAGCCTGCAGGCTGAAGATGTGGCAGTTTATTACTGTCAGCAATATTATAATACTCCTCGGACGTTCGGCCAAGGGACCAAGGTGGAAATCAAA
131	IML3694	Pre-vax	ADI-67754	IGHV4-4*07	IGHD2-8*01	IGHJ3*02	IGKV1-39*01	IGKJ1*01	4.1	3.5	S2	No						GCGAGAGACTCGCTAGGATATTGTTCTAGTTCCGGGTGCGAAGTTGCCTTTGACATC	ARDSLGYCSSSGCEVAFDI	CAACAGAGTTACAGTCCCCCTCCGTACACTTTTGGCCAGGGGAACAGTCCCCCTCCGGAGTACACT	QQSYSPPPYTFGQGNSPPPEYT	CAGGTGCAGCTGCAGGAGTCGGGCCCAGGATTGGTGAAGCCTTCGGAGACCCTGTCCCTCACCTGCAGTGTCTCTGGTGGCTCCATCAGTACTTACTACTGGAGCTGGATCCGGCAGCCCGCCGGGAAGGGACTGGAGTGGATTGGGCGTATCCATACCCGTGGCACCAACTACAGCCCCTCCCTCAAGAGTCGAGTCACCATGTCAGTAGACACGTCCAAGAACCAGTTCTCCCTGAAGCTGAACTCTGTGACGGCCGCGGACACGGCCGTGTATTATTGTGCGAGAGACTCGCTAGGATATTGTTCTAGTTCCGGGTGCGAAGTTGCCTTTGACATCTGGGGCCAAGGGACAATGGTCACCGTCTCTTCA	GACATCCAGATGACCCAGTCTCCATCCTCCCTGTCTGCATCTGTAGGAGACAGAGTCACCATCACTTGCCGGGCAAGTCAGAGCATTGGTAGTTATTTAAATTGGTATCAGCAGAAACCAGGGAAAGCCCCTAAACTCCTAATCTATACTGCATCCAATTTACAACGTGGGGTCCCATCAAGGTTCAGTGGCAGTGGATCTGGGACAGATTTCACTCTCACCATCAGCAGTCTGCAACCTGAAGATTTTGCAACTTACTACTGTCAACAGAGTTACAGTCCCCCTCCGTACACTTTTGGCCAGGGGAACAGTCCCCCTCCGGAGTACACTTTCGGCCAAGGGACCAAGGTGGAAATCAAA
132	IML3694	Pre-vax	ADI-67756	IGHV4-31*03	IGHD3-22*01	IGHJ4*02	IGKV3-11*01	IGKJ1*01	3.4	2.8	S2	No						GCGAGAGGGAATTACTTTGATGGTGATGGGTATGTGGACTAC	ARGNYFDGDGYVDY	CACCAGCGTCGCAACTGGCCGTACACT	HQRRNWPYT	CAGGTGCAGCTGCAGGAGTCGGGCCCAGGACTGGTGAAGCCTTCACAGACCCTGTCCCTCACCTGCAGTGTCTCTGGTGGCTCCATCAGCAGTGGTGGCTACTACTGGAACTGGATCCGCCATCACCCAGGGAAGGGCCTGGAGTGGATTGGGTTCATCTATTACAGTGGCAACACCTACTACAGCCCGTCCCTCAAGAGTCGAGTTACCATATCACTAGACACGTCTAAGAACCACTTCTCCCTGAAGCTGAGCTCTGTGACTGCCGCGGACACGGCCGTGTATTACTGTGCGAGAGGGAATTACTTTGATGGTGATGGGTATGTGGACTACTGGGGCCAAGGAACCCTGGTCACCGTCTCCTCA	GAAATTGTGTTGACACAGTCTCCAGCCACCCTGTCTTTGTCTCCAGGGGAAAGAGCCACCCTCTCCTGCAGGGCCAGTCAGAGTGTTAGCAGCTACTTAGCCTGGTACCAACAGAAACCTGGCCAGGCTCCCAGGCTCCTCATCTATGGTGCATCCAACAGGGCCACTGGCATCCCAGCCAGGTTCAGTGGCAGTGGGTCTGGGACAGACTTCACTCTCATCATCAGCAGTCTGGAGCCTGAAGATTTTGCAATGTATTACTGTCACCAGCGTCGCAACTGGCCGTACACTTTCGGCCAAGGGACCAAGGTGGAAATCAAA
133	IML3694	Pre-vax	ADI-67757	IGHV1-8*01	IGHD1-1*01	IGHJ6*02	IGKV3-15*01	IGKJ4*01	4.1	3.2	RBD	No		0.0216		0.0302		GCGAGAGGGGGAAGTCTAAAAGGGAACCGACGTCCGGTGGCATCTTCCTACTACTATAACGGTATGGACGTC	ARGGSLKGNRRPVASSYYYNGMDV	CAGCAATATAATAACTGGCCGCTCACC	QQYNNWPLT	CAGGTGCAGCTGGTGCAGTCTGGGGCTGAGGTGAAGAAGCCTGGGGCCTCAGTGAAGGTCTCCTGCAAGGCTTCTGGATACGCCTTCACCACTTATGACATCAACTGGGTGCGACAGGCCACTGGACAAGGGCTTGAGTGGATGGGATGGACGAACCCTAACAGTGGTAACACCGGCTATACACAGAAGTTCCAGGGCAGAATCACCATGACGAGGAACAACTCCATAAGCACAGCCTACATGGAGCTGAGCAGCCTGAGATCTGAAGACGCGGCCGTTTATTACTGTGCGAGAGGGGGAAGTCTAAAAGGGAACCGACGTCCGGTGGCATCTTCCTACTACTATAACGGTATGGACGTCTGGGGGCAAGGGACCACGGTCACCGTCTCCTCA	GAAATAGTGATGACGCAGTCTCCAGCCACCTTGTCTGTGTCTCCAGGGGACAGAGCCACCCTCTCCTGCAGGACCAGTCAGAGTGTTGACAGCTACTTGGCCTGGTACCAGCAGAAACCTGGCCAGGCTCCCAGGCTCCTCATCTATGGTGCATCCACCAGGGCCACTGGTATCCCAGCCAGGTTCAGTGGCAGTGGGTCTGGGACAGAGTTCACTCTCACCATCAGCAGCCTGCAGTCTGAAGATTTTGCAGTTTTTTACTGTCAGCAATATAATAACTGGCCGCTCACCTTCGGCGGAGGGACCAAGGTGGAGATCAAA
134	IML3694	Pre-vax	ADI-67760	IGHV5-51*03	IGHD6-6*01	IGHJ6*02	IGKV4-1*01	IGKJ2*01	3.1	3.6	Undefined	No						GCGAGATATGGGGCAGCTCGTCTCAACTCGGGGATAATAGAAGCTGACTACTACTACCATATGGACGTC	ARYGAARLNSGIIEADYYYHMDV	CACCAATATTATAATACTCCTCAGACG	HQYYNTPQT	GAGGTGCAGCTGGTGCAGTCTGGAGCAGAGGTGAAAAAGCCGGGGGAGTCTCTGAAGATCTCCTGTAAGGGTTCTGGATACAGGTTCACCAGCTACTGGATCGGCTGGGTGCGCCAGATGCCCGGGAAAGGCCTGGAATGGATGGGGACCATCTATCCTGGTGACTCTGAGACCAGATATAGCCCGTCCTTCCAAGGCCAGGTCACCATCTCAGCCGACAAGTCCTTCAGTACCGCCTACGTGCAGTGGAGCAGCCTGAAGGCCTCGGACACCGCCATGTATTACTGTGCGAGATATGGGGCAGCTCGTCTCAACTCGGGGATAATAGAAGCTGACTACTACTACCATATGGACGTCTGGGGGCAAGGGACCACGGTCACCGTCTCCTCA	GACATCGTGATGACCCAGTCTCCAGAGTCCCTGGCTGTGTCTCTGGGCGAGAGGGCCACCATCAACTGCAAGTCCAGCCAGAATATTTTATACATCTCCAATAATAAGAACTACTTAGGTTGGTACCAGCAGAGACCAGGGCAGCCTCCTAAGCTGCTCATTTCCTGGGCATCTACCCGGGAATCCGGGGTCCCTGACCGATTCAGTGGCAGCGGGTCTGGGACAGATTTCACTCTCACCATCAGCAGCCTGCAGGCTGAAGATGTGGCAGTTTATTACTGTCACCAATATTATAATACTCCTCAGACGTTTGGCCAGGGGACCAAGCTGGAGATCAAA
135	IML3694	Pre-vax	ADI-67761	IGHV3-7*01	IGHD3-3*01	IGHJ6*03	IGLV3-1*01	IGLJ1*01	3.4	2.8	S2	No						GCGAGAGAGGGAGTGGAAGTTACCCACTACATGGACGTC	AREGVEVTHYMDV	CAGGCGTGGGACACCAGAACATCCTGTGTC	QAWDTRTSCV	GAGGTGCAGCTGGTGGAGTCTGGGGGAGGCTTGGTCCAGCCTGGGGGGTCCCTGAGACTCTCCTGTGCAGCCTCTGAATTCACCTTTAGTATCTATTGGATGAGCTGGGTCCGTCAGGTTCCAGGGAAGGGGCTGGAGTGGGTGGCCATCATTAAGGCAGATGGAAGTGAGAAATACTATGTGGACTCTGTGAAGGGCCGATTCACCATCTCCAGAGACAACGCCAAGAACTCACTGTATCTGCAAATGAACAGCCTGAGAGTCGAGGACACGGCTGTGTATTATTGTGCGAGAGAGGGAGTGGAAGTTACCCACTACATGGACGTCTGGGGCAAAGGGACCACGGTCACCGTCTCCTCA	TCCTATGAGCTGACTCAGCCACCCTCAATGTCCGTGTCCCCAGGAGACACAGCCAGCATCACCTGCTCTGGAGATAAATTGGGGGATAAATATGCTTGCTGGTATCAGCAGAAGCCAGGCCAGTCCCCTGTGTTGGTCATCTATCAAGATAACAAGCGGCCCTCAGGGATCCCTGAGCGATTCTCTGGCTCCAACTCTGGGAACACAGCCACTCTGACCATCAGTGGGACCCAGGCTATGGATGAGGCTGACTATTACTGTCAGGCGTGGGACACCAGAACATCCTGTGTCTTCGGAACTGGGACCAAGGTCACCGTCCTA
136	IML3694	Pre-vax	ADI-67764	IGHV3-23*01	IGHD1-26*01	IGHJ6*03	IGLV2-14*01	IGLJ2*01	4.4	3.4	S2	Yes						GCGAAAGGCTATAGTGGGAGCTCCTGGGCCCTCTACTTCTTCTACTACATGGACGTC	AKGYSGSSWALYFFYYMDV	AGCTCATATACAAGTTACAGCACTGTGGTA	SSYTSYSTVV	GAGGTGCAGCTGGTGGAGTCTGGGGGAGGCTGGGTACAGCCTGGGGGGTCCCTGAGACTCTCCTGTGCAGCCTCTGGATTCACCTTTAGCAGCTTTGCCATGAACTGGGTCCGCCAGACTCCAGGGAAGGGGCTGGAGTGGGTCTCAGGTATTAGTGGTACTGGTGGCAGCACATACTACGCAGACTCCGTGAAGGGCCGGTTCACCATCTCCAGAGACAATTCCAAGAACACGCTGTCTCTGGAAATGAACAGCCTGAGAGCCGAGGACACGGCCTCTTATTACTGTGCGAAAGGCTATAGTGGGAGCTCCTGGGCCCTCTACTTCTTCTACTACATGGACGTCTGGGGCAAAGGGACCACGGTCACCGTCTCCTCA	CAGTCTGCCCTGACTCAGCCTGCCTCCGTGTCTGGGTCTCCTGGACAGTCGATCACCATTTCCTGCACTGGAACCAGCAGTGACGTTGGTGGTTATAACTATGTCTCCTGGTACCAACAGCACCCAGGCAAAGCCCCCAAACTCATGATTTATGATGTCCAGAATCGGCCCTCAGGGGTTTCTAATCGCTTCTCTGGCTCCAAGTCTGACAAGACGGCCTCCCTGACCATCTCTGGGCTCCAGGCTGAGGACGAGGCTGATTATTACTGCAGCTCATATACAAGTTACAGCACTGTGGTATTCGGCGGAGGGACCAAGCTGACCGTCCTA
137	IML3694	Pre-vax	ADI-67767	IGHV5-51*03	IGHD2-2*01	IGHJ6*02	IGKV3-20*01	IGKJ1*01	4.4	2.8	S2	No						GCGAGACTAAGCGCTGCGACCAGCAGTTCATACTCCTACTCCTACAGTCTGGACGTC	ARLSAATSSSYSYSYSLDV	CAGCAGTATAGTAGCTCACGGGGGACG	QQYSSSRGT	GAGGTGCAGCTGGTGCAGTCTGGAGCAGAGGTGAAAAAGCCGGGGGAGTCTCTGAAGATCTCCTGTCAGGGTTCTGGATACACCTTTACCGACTACTGGATCGCCTGGGTGCGCCAGATGCCCGGGAAAGGCCTGGAGTGGATGGGTATCATCTATCCCGATGACTCTGATACCAGATACAGCCCGTCCTTCCAAGGCCTGGTCACCATCTCAGCCGACAGGTCCATCAGCACCGCCTACCTGCAGTGGAGCAGCCTGAAGGCCTCAGACGCCGCCATGTACTACTGTGCGAGACTAAGCGCTGCGACCAGCAGTTCATACTCCTACTCCTACAGTCTGGACGTCTGGGGGCAAGGGACCACGGTCACCGTCTCCTCA	GAAATTGTGTTGACGCAGTCTCCAGGCACCCTGTCTTTGTCTCCAGGGGAAAGAGCCACCCTCTCCTGCAGGGCCAGTCAGAGTCTTAGCAGCACCAACTTAGCCTGGTACCAGCAGAAACCTGGCCAGGCTCCCAGGCTCCTCATCTATGGGGCGTCCAGGAGGGCCACTGGCATCCCAGACAGGTTCAGTGGCAGTGGGTCTGGGACAGACTTCACTCTCACCATCAGCAGACTGGAGCCTGAAGATTTTGCAGTGTATTTCTGTCAGCAGTATAGTAGCTCACGGGGGACGTTCGGCCAAGGGACCAAGGTGGAAATCAAA
138	IML3694	Pre-vax	ADI-67768	IGHV4-34*01	IGHD2-15*01	IGHJ6*02	IGLV2-23*02	IGLJ3*02	3.4	2.7	NTD	No						GCGAGGTCGTGGTCATCTCGTATGTACGGTATGGACGTC	ARSWSSRMYGMDV	TCATATGTAGGTAGTAGCACTTGGGTG	SYVGSSTWV	CAGGTGCAGCTACAACAGTGGGGCGCAGGACTGTTGAAGCCTTCGGAGACCCTGTCCCTCACCTGCGGTGTCTATGGTGGGTCCTTCAGTGATCACTACTGGAGTTGGATCCGCCAGCCCCCAGGGAAGGGGCTGGAGTGGATTGGGGAAGTCAGTCATAGTGGAAGCACCAACTACACCCCGTCCCTCAAGAGTCGAGTCACCATATTAGTAGACACGTCCAAGAACCAGTTCTCCCTGAAGCTGAACTCTGTGACCGCCGCGGACACGGCTGTGTATTACTGTGCGAGGTCGTGGTCATCTCGTATGTACGGTATGGACGTCTGGGGGCAAGGGACCACGGTCACCGTCTCCTCA	CAGTCTGCCCTGACTCAGCCTGCCTCCGTGTCTGGGTCTCCTGGACAGTCGATCACCATCTCCTGCACTGGAACCAGCAGTGATGTTGGGAGTTATAACCTTGTCTCCTGGTACCAACAGTATCCAGGCAAAGTCCCCAAACTGATAATTTATGAGGTCAATAAGCGGCCCTCAGGGGTTTCTAATCGCTTCTCTGGCTCCAAGTCTGGCAACACGGCCTCCCTGACAATCTCTGGGCTCCAGGCTGAGGACGAGGCTGATTATTACTGCTACTCATATGTAGGTAGTAGCACTTGGGTGTTCGGCGGAGGGACCAAGCTGACCGTCCTA
139	IML3694	Pre-vax	ADI-67769	IGHV1-18*01	IGHD3-3*01	IGHJ5*02	IGKV3-20*01	IGKJ1*01	2.4	1.4	S2	No						GCGAGAGACGCCTTAACGTTTTTTGGAGTGGTTATTACGCACGACTGGAGTTGGTTCGACCCC	ARDALTFFGVVITHDWSWFDP	CAGCAGTATGGTAGCTCACCGTACACT	QQYGSSPYT	CAGGTTCAGCTGGTGCAGTCTGGAGCTGAGGTGAAGAAGCCTGGGGCCTCAGTGAAGGTCTCCTGCAAGGCTTCTGGTTACACCTTTACCAATTATGGTATCAACTGGGTGCGACAGGCCCCTGGACAAGGGCTTGAGTGGCTGGGATGGATCAGCGCTTACAATGGTAACACAAACTATGCACAGAAGCTCCAGGGCAGAGTCACCATGACCACAGACACATCCACGAGCACAGTCTACATGGAGGTGAGGAGCCTGAGATCTGACGACACGGCCGTCTATTACTGTGCGAGAGACGCCTTAACGTTTTTTGGAGTGGTTATTACGCACGACTGGAGTTGGTTCGACCCCTGGGGCCAGGGAACCCTGGTCACCGTCTCCTCA	GAAATTGTGTTGACGCAGTCTCCAGGCACCCTGTCTTTGTCTCCAGGGGAAAGAGCCACCCTCTCCTGCAGGGCCAGTCAGAGTGTTAGCAGCAGCTACTTAGCGTGGTACCAGCAGAAACCTGGCCAGGCTCCCAGGCTCCTCATCTCTGGTGCATCCAGCAGGGCCACTGACATCCCAGACAGGTTCAGTGGCAGTGGGTCTGGGTCAGACTTCACTCTCACCATCAGCAGACTGGAGCCTGAAGATTTTGCAGTGTATTACTGTCAGCAGTATGGTAGCTCACCGTACACTTTCGGCCAAGGGACCAAGGTGGAAATCAAA
140	IML3694	Pre-vax	ADI-67770	IGHV3-23*01	IGHD2-2*02	IGHJ6*03	IGKV3-15*01	IGKJ1*01	2	0	S2	No		>1.0				GCGAAAGCCTCTATTGTAGTACTACCAGCTGCTATATTC	AKASIVVLPAAIF	CAGCAGTATAATAACTGGCCTCGGGGCACT	QQYNNWPRGT	GAGGTGCAGCTGGTGGAGTCTGGGGGAGGCTTGGTACAGCCTGGGGGGTCCCTGAGACTCTCCTGTGCAGCCTCTGGATTCACCTTTAGCAGCTATGCCATGAGCTGGGTCCGCCAGGCTCCAGGGAAGGGGCTGGAGTGGGTCTCAACTATTAGTGCTAGTGGTGGTAGCACAAACTACGCAGACTCCGTGAAGGGCCGGTTCACCATCTCCAGAGACATCTCCAAGAACACGCTGTATCTGCAAATGAACAGCCTGAGAGCCGAGGACACGGCCGTATATTACTGTGCGAAAGCCTCTATTGTAGTACTACCAGCTGCTATATTCTGGGGCAAAGGGACCACGGTCACCGTCTCCTCA	GAAATAGTGATGACGCAGTCTCCAGCCACCCTGTCTGTGTCTCCAGGGGAAAGAGCCACCCTCTCCTGCAGGGCCAGTCAGAGTGTTAGCAGCAACTTAGCCTGGTACCAGCAGAAACCTGGCCAGGCTCCCAGGCTCCTCATCTATGGTGCATCCACCAGGGCCACTGGTATCCCAGCCAGGTTCAGTGGCAGTGGGTCTGGGACAGAGTTCACTCTCACCATCAGCAGCCTGCAGTCTGAAGATTTTGCAGTTTATTACTGTCAGCAGTATAATAACTGGCCTCGGGGCACTTTCGGCCAAGGGACCAAGGTGGAAATCAAA
141	IML3694	Pre-vax	ADI-67772	IGHV1-2*02		IGHJ4*02	IGKV2-24*01	IGKJ1*01	4.7	2.4	S2	No						GCGAGAGCAATTGACTAC	ARAIDY	ATGCAAGCTACACAATACCCGTGGACG	MQATQYPWT	CAGGTGCAGCTGGTGCAGTCTGGGGCTGAGGTGAAGAAGCCTGGGGCCTCAGTGAGGGTCTCCTGCAAGACTTCTGGATACACCCTCACCGAATACTATATGCACTGGGTGCGACAGGCCCCTGGACAAGGGCTTGAGTGGATGGGATGGATCAACCCTAACAGTGGTGTCACGGACTATGCACAGAAGTTTCAGGGCAGGATCATCATGACCAGGGACACGTCCATCAGCACAGTCTACATGGAGTTGACCAGGCTGAGATCTGACGACACGGCCGTGTATTATTGTGCGAGAGCAATTGACTACTGGGGCCAAGGAACCCTGGTCACCGTCTCCTCA	GATATTGTGATGACCCAGACTCCACTCTCCTCACCTGTCACCCTTGGACAGCCGGCCTCCATCTCCTGCAGGTCTAGTCAAAGCCTCGTACACAGTGATGGAAATACCTACTTGAATTGGTTTCACCAGAGGCCAGGCCAGCCTCCAAGACTCCTATTTTATAAGATTTCTAACCGGTTCTCTGGGGTCCCAGACAGATTCAGTGGCAGTGGGGCAGGGACAGATTTCACACTGAAAATCAGCAGGGTGGAGGCTGAGGATGTCGGAGTTTATTACTGCATGCAAGCTACACAATACCCGTGGACGTTCGGCCAAGGGACCAAGGTGGAAATCAAA
142	IML3694	Pre-vax	ADI-67775	IGHV3-30-3*01	IGHD2-2*01	IGHJ4*02	IGKV1-39*01	IGKJ4*01	2.7	2.8	S2	No						GCGAGAGGGAGATGGGATATTGTAATAGCGTCCCCCCACGGAATTCTAGCCTAC	ARGRWDIVIASPHGILAY	CAACAGAGTTACAGTACCCCTCCGCTCACT	QQSYSTPPLT	CAGGTGCAGCTGGTGGAGTCTGGGGGAGGCGTGGTCCAGCCTGGGAGGTCCCTGAGACTCTCCTGTGCAGCCTCTGGATTCACCTTCAGTACCTATGCTATGCACTGGGTCCGCCAGGCTCCAGGCAAGGGGCTGGAGTGGGTGGCTGTTATATCATATGACGGAAATAATAAATACTACGCAGACTCCGTGAAGGGCCGATTCACCGTCTCCAGAGACAATTCCAAGAACACGCTGTATCTGCAAATGAGCAGCCTGAGAGCTGAGGACACGGCTGTCTATTACTGTGCGAGAGGGAGATGGGATATTGTAATAGCGTCCCCCCACGGAATTCTAGCCTACTGGGGCCAAGGAACCCTGGTCACCGTCTCCTCA	GACATCCAGATGACCCAGTCTCCATCCTCCCTGTCTGCATCTGTCGGAGACAGAGTCACCATCACATGCCGGGCAAGTCAGAGCATTAGCAACTCTTTAATTTGGTATCAGCAGAAACCAGGGAAAGCCCCTAAGCTCCTGATCTATGCTGCATCCAGTTTGCAAAGTGGGGTCCCACCAAGGTTCAGTGGCAGTGGATCTGGGACAGATTTCACTCTCACCATCAGCAGTCTGTTACCTGAAGATTTTGCAACTTACTACTGTCAACAGAGTTACAGTACCCCTCCGCTCACTTTCGGCGGAGGGACCAAGGTGGAGATCAAA
143	IML3694	Pre-vax	ADI-67776	IGHV3-11*01	IGHD5-18*01	IGHJ6*02	IGLV2-8*01	IGLJ2*01	5.8	1.7	S2	No						GCGAGAGGGGGGGGGTACAGCTTTTACTTCTCCTACGGCATGGACGTC	ARGGGYSFYFSYGMDV	AGCTCATATACAGGCAGCAACAATTTGGGAGTA	SSYTGSNNLGV	CAGGTGCAGCTGGTGGAGTCTGGGGGAGGCTTGGTCAAGCCTGGAGGGTCCCTGAGACTCTCGTGTGCAGGCTATGGATTCAGTTTCAGTGACCACTACATGACCTGGATCCGCCAGGCTCCAGGGAAGGGGCTGGAATGGGTTGCATACATTAGTAGTAGTGCTCGTAACATATACTACGCACACTCTGTGAAGGGCCGATTCACCATCTCCAGGGACAACGGCAAGAACTCACTGTTTCTCCAAATGAACAGCCTGAGAGCCGAGGACACGGCCGTCTATTACTGTGCGAGAGGGGGGGGGTACAGCTTTTACTTCTCCTACGGCATGGACGTCTGGGGGCAAGGGACCACGGTCACCGTCTCCTCA	CAGTCTGCCCTGACTCAGCCTCCCTCCGCGTCCGGGTCTCCTGGACAGTCAGTCACCATCTCCTGCACTGGAACCAGCAGTGACATTGGTGGTTATAACTATGTCTCCTGGTATCAACAGCACCCAGGCAAAGCCCCCAAACTCATGATTTTTGAGGTCAGTAAGCGGCCCTCAGGGGTCCCTGATCGCTTCTCTGGCTCCAAGTCTGGCAACACGGCCTCCCTGACCGTCTCTGGGCTCCAGGCTGAGGATGAAGCTGATTATTACTGCAGCTCATATACAGGCAGCAACAATTTGGGAGTATTCGGCGGAGGGACCAAGCTGACCGTCCTA
144	IML3694	Pre-vax	ADI-67777	IGHV1-2*04	IGHD2-8*01	IGHJ6*02	IGLV1-44*01	IGLJ1*01	3.7	1.7	S2	No						GCGAGAGATTGGGTGGGAACTTGTCCTGATGATTTATGCCACTACTACGGTATGGACGTC	ARDWVGTCPDDLCHYYGMDV	GCAGCATGGGATGACAGCCTGAATGGTCTTTATGTC	AAWDDSLNGLYV	CAGGTGCAGCTGGTGCAGTCTGGGGCTGAGGTGAAGGCGCCTGGGGCCTCAGTGAAGGTCTCCTGCAAGGCTTCTGGATACACCTTCACCGACTACTATATACACTGGGTGCGACAGGCCCCTGGACAAGGGCTTGAGTGGATGGGATGGATCAACTCACACAGTGGTGGCACAAACTATGCACAGAAGTTTCGGGGCTGGGTCACCATGACCAGGGACACGTCCATCAGCACAGCCTACATGGAGCTGAGGAGACTGAGATCTGACGACATGGCCGTGTATTACTGTGCGAGAGATTGGGTGGGAACTTGTCCTGATGATTTATGCCACTACTACGGTATGGACGTCTGGGGGCAAGGGACCACGGTCACCGTCTCCTCA	CAGTCTGTGCTGACTCAGCCACCCTCAGCGTCTGGGACCCCCGGGCAGAGGGTCACCATCTCTTGTTCTGGAAGCAACTCCAACATCGGAAGTAATACTGTGAACTGGTACCGGCAGCTCCCAGGAACGGCCCCCAAACTCCTCATCTATAGTAACAATGAGCGGCCCTCAGGGGTCCCTGACCGATTCTCTGGCTCCAAGTCTGGCACCTCAGCCTCCCTGGCCATCAGTGGGCTCCAGTCTGAGGATGAGGCTGATTATTACTGTGCAGCATGGGATGACAGCCTGAATGGTCTTTATGTCTTCGGAACTGGGACCAAGGTCACCGTCCTA
145	IML3694	Pre-vax	ADI-67779	IGHV4-31*03	IGHD3-22*01	IGHJ4*02	IGKV3-11*01	IGKJ1*01	7	2.5	S2	No						GCGAGAGGGAATTACTATGATGGCAGTGGCTATGTGGACTAC	ARGNYYDGSGYVDY	CACCAGCGTAGCAACTGGCCGTACACT	HQRSNWPYT	CAGGTGCAGCTGCAGGAGTCGGGCCCAGGACTGGTGAAGCCATCACAGACCCTGTCCCTCACCTGCACTGTCTCTGGTGGCTCCATCAGCAGTAGTGGTTACTACTGGAACTGGGTCCGCCAGCACCCACGGAAGGGCCTGCAGTGGATTGGGTTCATCTATTACAGTGGGAATACCTATTACAACCCGTCCCTCCAGAGTCAGGTTACCATTTCAATGGACACGTCTAAGAACCAGTTCTCCCTGAGGTTGAACTCTGTGACTGCCGCGGACACGGCCCTTTATTACTGTGCGAGAGGGAATTACTATGATGGCAGTGGCTATGTGGACTACTGGGGCCAAGGAACCCTGGTCACCGTCTCCTCA	GAAATTGTGTTGACACAGTCTCCAGCCACCCTGTCTTTGTCTCCAGGGCAAAGAGCCACCGTCTCCTGCAGGGCCAGTCAGAGTGTTACCAGCTACTTAGCCTGGTACCAACATAAACCTGGCCAGGCTCCCAGGCTCCTCATCTATGATGCATCCAACAGGGCCACTGGCATCCCAGACAGGTTCAGTGGCAGTGGGTCTGGGACAGACTTCACTCTCACCATCAGCAGCCTAGAGCCTGAAGATTTTGTAGTTTATTACTGTCACCAGCGTAGCAACTGGCCGTACACTTTCGGCCAAGGGACCAAGGTGGAAATCAAA
146	IML3694	Pre-vax	ADI-67780	IGHV3-74*01	IGHD6-19*01	IGHJ6*03	IGKV3-20*01	IGKJ3*01	4.4	2.8	S2	No						TCAAGAGATCCCCTTACGACGACGTATAGCAGTGGCTGGTATAATTACTACTCCTACATGGACGTC	SRDPLTTTYSSGWYNYYSYMDV	CAGCAGTACGGTAACTCACTTTTCACT	QQYGNSLFT	GAGGTGCAGCTGGTGGAGTCCGGGGGAGGCTTAGTTCTGCCTGGGGGGTCCCTGAGACTCTCCTGTGCAGCCTCTGGATTCAGTTTCAGTAACTACTGGATGCACTGGGTCCGCCAAAGTCCAGGGAAGGGGCTGGTGTGGGTCTCACGTATTAATACTGATGGGGATAGCACAACCTACGCGGACTCCGTGAAGGGCCGATTCACCATCTCCAGAGACAACGCCAAGAACACGCTGTATCTGCAAATGAACAGTCTGAGAGCCGAGGACACGGCTATTTATTACTGTTCAAGAGATCCCCTTACGACGACGTATAGCAGTGGCTGGTATAATTACTACTCCTACATGGACGTCTGGGGCAAAGGGACCACGGTCACCGTCTCCTCA	GAAATTGTGTTGACGCAGTCTCCAGGCACCCTGTCTTTGTCTCCAGGGGAAAGAGCCACCCTCTCCTGCAGGGCCAGTCAGAGTGTTAGGTACACCTACTTAGCCTGGTATCAGCAGAAACCTGGCCAGGCTCCCAGGCTCCTCATCTATGGTGCATCCAGCAGGGCCACTGGCATCCCAGACAGGTTCAGTGGCAGTGGGTCTGGGACAGACTTCACTCTCACCATCAGCAGACTGGAGCCTGAGGATTTTGCAGTGTATTACTGTCAGCAGTACGGTAACTCACTTTTCACTTTCGGCCCTGGGACCAAAGTGGATATCAAA
147	IML3694	Pre-vax	ADI-67781	IGHV4-31*03	IGHD3-22*01	IGHJ4*02	IGKV3-11*01	IGKJ1*01	3.4	2.8	S2	No						GCGAGAGGGAATTACTTTGATGGTGATGGGTATGTGGACTAC	ARGNYFDGDGYVDY	CACCAGCGTCGCAACTGGCCGTACACT	HQRRNWPYT	CAGGTGCAGCTGCAGGAGTCGGGCCCAGGACTGGTGAAGCCTTCACAGACCCTGTCCCTCACCTGCAGTGTCTCTGGTGGCTCCATCAGCAGTGGTGGCTACTACTGGAACTGGATCCGCCATCACCCAGGGAAGGGCCTGGAGTGGATTGGGTTCATCTATTACAGTGGCAACACCTACTACAGCCCGTCCCTCAAGAGTCGAGTTACCATATCACTAGACACGTCTAAGAACCACTTCTCCCTGAAGCTGAGCTCTGTGACTGCCGCGGACACGGCCGTGTATTACTGTGCGAGAGGGAATTACTTTGATGGTGATGGGTATGTGGACTACTGGGGCCAAGGAACCCTGGTCACCGTCTCCTCA	GAAATTGTGTTGACACAGTCTCCAGCCACCCTGTCTTTGTCTCCAGGGGAAAGAGCCACCCTCTCCTGCAGGGCCAGTCAGAGTGTTAGCAGCTACTTAGCCTGGTACCAACAGAAACCTGGCCAGGCTCCCAGGCTCCTCATCTATGGTGCATCCAACAGGGCCACTGGCATCCCAGCCAGGTTCAGTGGCAGTGGGTCTGGGACAGACTTCACTCTCATCATCAGCAGTCTGGAGCCTGAAGATTTTGCAATGTATTACTGTCACCAGCGTCGCAACTGGCCGTACACTTTCGGCCAAGGGACCAAGGTGGAAATCAAA
148	IML3694	Pre-vax	ADI-67783	IGHV3-30*18	IGHD2-2*01	IGHJ5*02	IGLV1-40*01	IGLJ3*02	5.1	4.1	S2	No						GCGAAAGATTCCCAGCCGTACCAGTTGCTATTCGGAGACACGTCTTTCGACCCC	AKDSQPYQLLFGDTSFDP	CAGTCTTATGACAGGGGCCTGCGTCCTTGGGTG	QSYDRGLRPWV	CAGGTGCAGCTGGTGGAGTCTGGGGGAGGCGTGGTCCAGCCTGGGAGGTCCCTGAGACTCTCCTGTGCAGCCTCTGGATTTGCCGTCAGTACTTATGGCATACACTGGGTCCGCCAGGCTCCTGGCAAGGGGCTGGAGTGGGTGGCTGTCATCTCATATGATGGGAGCAATAAATACTATACAGACTCCGTGAAGGGCCGATTCACCATCTCCAGAGACAATTCCAAGAACACGCTGTATCTGCAAATGAACAGTCTGAGAGTTGAGGACACGGCTGTGTATTACTGTGCGAAAGATTCCCAGCCGTACCAGTTGCTATTCGGAGACACGTCTTTCGACCCCTGGGGCCAGGGAACCCTGGTCACCGTCTCCTCA	CAGTCTGTGCTGACGCAGCCGCCCTCAGTGTCTGGGACCCCAGGGCAGAGGGTCACCATCTCCTGCACTGGGAGCAGCTCCAACATCGGGGCAGGTTATGGTGTAAACTGGTACCAGCAACTTCCAGGAACAGCCCCCAAACTCCTCATTTATGCTAATACCAATCGGCCCTCAGGGGTCCCTGACCGATTCTCTGGCTCCAAGTCTGGCACCTCAGCCTCCCTGGCCATCACTGGGCTCCAGGCTGAGGATGAGGCTGATTATTACTGCCAGTCTTATGACAGGGGCCTGCGTCCTTGGGTGTTCGGCGGAGGGACCAAGCTGACCGTCCTA
149	IML3694	Pre-vax	ADI-67785	IGHV4-31*03	IGHD6-13*01	IGHJ3*02	IGKV3-15*01	IGKJ2*01	2	3.1	Undefined	No						GCGAGAGATCTTCTCCCGCTGGCGGGACCCTATGTTTTTGATATC	ARDLLPLAGPYVFDI	CAGCAGTATAATAATTGGCCCCCCGCCACT	QQYNNWPPAT	CAGGTGCAGCTGCAGGAGTCGGGCCCAGGACTGATGAAGCCTTCACAGACCCTGTCCCTCACCTGCACTGTCTCTGGTGGCTCCATCAGCAGTGGTGCTTATTACTGGAGCTGGATCCGCCAGCACCCAGGGAAGGGCCTGGAGTGGATTGGGTACATCTATTACAGTGGGGGCACCTACTACAACCCGTCCCTCAAGAGTCGAGTTACCATATCAATAGACACGTCTAAGAACCAGTTCTCCCTGAAGCTGCGCTCTGTGACTGCCGCGGACACGGCCGTGTATTACTGTGCGAGAGATCTTCTCCCGCTGGCGGGACCCTATGTTTTTGATATCTGGGGCCAAGGGACAATGGTCACCGTCTCTTCA	GAAATAGTGATGACGCAGTCTCCAGCCACACTGTCTGTGTCTCCAGGGGAAAGAGCCACCCTCTCCTGCAGGACCAGTCAGAGTGTTCGCGGCAACTTGGCCTGGTACCAGCAGAAACCTGGCCAGGCTCCCAGGCTCCTCCTCTACGGTGCATCCACCAGGGCCACTGGTATCCCAGCCAGGTTCAGTGGCAGTGGGTCTGGGACAGAGTTCACTCTCACCATCAGCAGCCTGCAGTCTGAAGATTTTGCAGTTTATTACTGTCAGCAGTATAATAATTGGCCCCCCGCCACTTTTGGCCAGGGGACCAAGCTGGAGATCAAA
150	IML3694	Pre-vax	ADI-67787	IGHV4-31*03	IGHD3-22*01	IGHJ4*02	IGKV3-11*01	IGKJ2*01	3.4	2.8	NTD	No						GCGAGAGGGAATTACTTTGATGGTGATGGGTATGTGGACTAC	ARGNYFDGDGYVDY	CACCAGCGTCGCAACTGGCCGTACACT	HQRRNWPYT	CAGGTGCAGCTGCAGGAGTCGGGCCCAGGACTGGTGAAGCCTTCACAGACCCTGTCCCTCACCTGCAGTGTCTCTGGTGGCTCCATCAGCAGTGGTGGCTACTACTGGAACTGGATCCGCCATCACCCAGGGAAGGGCCTGGAGTGGATTGGGTTCATCTATTACAGTGGCAACACCTACTACAGCCCGTCCCTCAAGAGTCGAGTTACCATATCACTAGACACGTCTAAGAACCACTTCTCCCTGAAGCTGAGCTCTGTGACTGCCGCGGACACGGCCGTGTATTACTGTGCGAGAGGGAATTACTTTGATGGTGATGGGTATGTGGACTACTGGGGCCAAGGAACCCTGGTCACCGTCTCCTCA	GAAATTGTGTTGACACAGTCTCCAGCCACCCTGTCTTTGTCTCCAGGGGAAAGAGCCACCCTCTCCTGCAGGGCCAGTCAGAGTGTTAGCAGCTACTTAGCCTGGTACCAACAGAAACCTGGCCAGGCTCCCAGGCTCCTCATCTATGGTGCATCCAACAGGGCCACTGGCATCCCAGCCAGGTTCAGTGGCAGTGGGTCTGGGACAGACTTCACTCTCATCATCAGCAGTCTGGAGCCTGAAGATTTTGCAATGTATTACTGTCACCAGCGTCGCAACTGGCCGTACACTTTTGGCCAGGGGACCAAGCTGGAGATCAAA
151	IML3694	Pre-vax	ADI-67788	IGHV4-31*03	IGHD3-22*01	IGHJ4*02	IGKV3-11*01	IGKJ2*01	3.4	2.8	S2	No						GCGAGAGGGAATTACTTTGATGGTGATGGGTATGTGGACTAC	ARGNYFDGDGYVDY	CACCAGCGTCGCAACTGGCCGTACACT	HQRRNWPYT	CAGGTGCAGCTGCAGGAGTCGGGCCCAGGACTGGTGAAGCCTTCACAGACCCTGTCCCTCACCTGCAGTGTCTCTGGTGGCTCCATCAGCAGTGGTGGCTACTACTGGAACTGGATCCGCCATCACCCAGGGAAGGGCCTGGAGTGGATTGGGTTCATCTATTACAGTGGCAACACCTACTACAGCCCGTCCCTCAAGAGTCGAGTTACCATATCACTAGACACGTCTAAGAACCACTTCTCCCTGAAGCTGAGCTCTGTGACTGCCGCGGACACGGCCGTGTATTACTGTGCGAGAGGGAATTACTTTGATGGTGATGGGTATGTGGACTACTGGGGCCAAGGAACCCTGGTCACCGTCTCCTCA	GAAATTGTGTTGACACAGTCTCCAGCCACCCTGTCTTTGTCTCCAGGGGAAAGAGCCACCCTCTCCTGCAGGGCCAGTCAGAGTGTTAGCAGCTACTTAGCCTGGTACCAACAGAAACCTGGCCAGGCTCCCAGGCTCCTCATCTATGGTGCATCCAACAGGGCCACTGGCATCCCAGCCAGGTTCAGTGGCAGTGGGTCTGGGACAGACTTCACTCTCATCATCAGCAGTCTGGAGCCTGAAGATTTTGCAATGTATTACTGTCACCAGCGTCGCAACTGGCCGTACACTTTTGGCCAGGGGACCAAGCTGGAGATCAAA
152	IML3694	Pre-vax	ADI-67791	IGHV3-30*03	IGHD2-2*01	IGHJ1*01	IGKV1-5*03	IGKJ1*01	4.5	5.3	S2	No						GTCGGAAGTAGGGCGGCGTACCAGTTGCCTTTGTTCACTCTC	VGSRAAYQLPLFTL	CAGCATTTTAATCGATATTCGGGGACG	QHFNRYSGT	CAGGTGCAGCTGGTGGAGTCTGGGGGAGGCGTGGTCCAGCCTGGGAGGTCACTGAGACTCTCCTGTGCAGCCTCTGGATTCACCTTCAGTAGCCATGCCATGCACTGGGTCCGCCAGGCTCCAGGCAAGGGGCTGGAGTGGGTGGCAGTTATATCATATGATGGAGATCAGAAATACTATGTAGACTCTGTGAAGGGCCGATTCATCATCTCCAGAGACAATTCCAAGAACACGCTGCATCTGCAAATAAACAGCCTGAGAGCTGAGGACACGGCTGTGTATTTCTGTGTCGGAAGTAGGGCGGCGTACCAGTTGCCTTTGTTCACTCTCTGGGGCCAGGGCACCCTGGTCACCGTCTCCTCA	GACATCCAGATGACCCAGTCTCCTTCCACCCTGTCTGCATCTGTAGGAGAGGAAGTCACCATCACTTGCCGGGCCAGTCAGAGTATTGGTGACTGGTTGGCCTGGTATCAGCAGAAACCAGCGAAAGCCCCTAAGCTCCTGATCTATAAGGCGTCTAATTTAGAAAGTGGGGTCCCATCAAGGTTCAGCGGCAGTGGTTCTGGGGCAGAATTCACTCTCACCATCAGCAGCCTGCAGCCTGATGATTTTGCAACTTATTACTGCCAGCATTTTAATCGATATTCGGGGACGTTCGGCCAAGGGACCAAGGTGGAAATCAAA
153	IML3694	Pre-vax	ADI-67792	IGHV4-39*01	IGHD4-17*01	IGHJ4*02	IGKV1-5*03	IGKJ1*01	6.4	2.5	Undefined	No						GCGAGACATGATTATAGGACCACGGTGACGATGATTGACTAC	ARHDYRTTVTMIDY	CAACAGTATACTATGAAAACGACG	QQYTMKTT	CAGCTGCAGCTGCAGGAGTCGGGCCCAGGACTGGTGATCCCTTCGGAGACCCTGTCCCTCACCTGCACTGTCTCTGGTGCCTCCATCAGCGGAAGTAGTTATTATTGGGGCTGGATCCGCCAGACCCCAGGGAAGGGTCTGGAGTGGATTGGCAGTATCTATTATAGTGGGATCACCTTTTACAACCCGTCCCTCAAGAGTCGAGTCACCGTATCCGTGGACACGTCCAAGAACAACTTCTCCCTGAAGCTGACCTCTGTGACCGCCGCAGACACGGCTGTTTATTACTGTGCGAGACATGATTATAGGACCACGGTGACGATGATTGACTACTGGGGCCAAGGAACCCTGGTCACCGTCTCCTCA	GACATCCAGATGACCCAGTCTCCTTCCACCCTGTCTGCATCTGTAGGAGACAGAGTCACCATCACTTGCCGGGCCAGTCAGAGTATTAGTGTCTGGTTGGCCTGGTATCAGCAGAAGCCAGGGAAAGCCCCTAAACTCCTGATCTATAAGGCGTCTACTTTACAAAGTGGGGTCCCATCAAGGTTCAGCGGCAGTGGATCTGGGACAGAATTCACTCTCACCATCAGCAGCCTGCAGCCTGATGATTTTGCAACTTATTACTGCCAACAGTATACTATGAAAACGACGTTCGGCCAAGGGACCAAGGTGGAAATCAAA
154	IML3694	Pre-vax	ADI-67793	IGHV4-59*01	IGHD2-2*02	IGHJ3*02	IGKV1-39*01	IGKJ1*01	4.8	6.4	S2	No						GCGAGAAGGGGTTTAGGATATTGTGGTAGTTCCAGGTGCTATAGTGCTTTTGATTTC	ARRGLGYCGSSRCYSAFDF	CAGCAGAATTACCATATCCTGTACACT	QQNYHILYT	CAGGTGCAGCTGCAGGAGTCGGGCCCAGGACTGGTGAAGCCTTCGGAGACCCTGTCCCTCACCTGCACTGTCTCTAGTGGCTCCATCAGAAATTATTACTGGAGTTGGATTCGGCAGTCCCCAGGGAAGGGACTGGAGTGGATTGGAGATATCTATTACAGTGGGAGCACCAACTACAACCCCTCCCTCAAGAGTCGAGTCACCATTTCAGTAGTCACGTCCAAGAACCAGTTCTCCCTGAACCTGAACTCTGTGACCTCTGCGGACACGGCCGTGTATTACTGTGCGAGAAGGGGTTTAGGATATTGTGGTAGTTCCAGGTGCTATAGTGCTTTTGATTTCTGGGGCCAAGGGACAATGGTCACCGTCTCTTCA	GACATCCAGATGACCCAGTCTCCATCCTCCCTGTCTGCATCTGTAGGAGACAGAGTCACCATCACTTGCCGGACAAGTCAGACCATCAGCAATTATTTAAATTGGTATCGACAGAAACCAGGGAGAGCCCCTGACCTCCTCATCTACGCTGCATCCAGTTTGCAAAGTGGGGTCCCATCAAGGTTCAGTGGCAGTGGATCTGGGACAGATTTCACTCTCACCATCAGCAGTGTGCAACCTGAAGATTTTGCAACTTACTACTGTCAGCAGAATTACCATATCCTGTACACTTTCGGCCAAGGGACCAAGGTGGAAATCAAA
155	IML3694	Pre-vax	ADI-67794	IGHV3-23*01	IGHD3-3*01	IGHJ6*03	IGKV2-28*01	IGKJ3*01	3.1	3.7	Undefined	No						GCGAACCCGCCCAATTTTTGGAGTGGTTATTCTCTCTACTATAACCACTACATGGACGTC	ANPPNFWSGYSLYYNHYMDV	ATGCAAGGTTTACAAAGTCCATTCACT	MQGLQSPFT	GAGGTGCAGCTGGTGGAGTCTGGGGGAGGCTTGGTACAGCCTGGGGGGTCCCTGAGACTCTCCTGTGCAGCCTCTGGAATCTTCTTTAGCAGCTATGCCATGAGCTGGGTCCGCCAGGCTCCAGGAAAGGGGCTGGAGTGGGTCTCAACTCTTAGTGGTAGTGGTGGTGGCACATACTACGCAGACTCCGTGAAGGGCCGGTTCACCATCTCCAGAGACAATTCCAAGAACACGCTGTATCTGCAAATGAACAACCTGAGAGCCGAGGACACGGCCGTATATTACTGTGCGAACCCGCCCAATTTTTGGAGTGGTTATTCTCTCTACTATAACCACTACATGGACGTCTGGGGCAAAGGGACCACGGTCACCGTCTCCTCA	GATATTGTGATGACTCAGTCTCCACTCTCCCTGCCCGTCACCCCTGGAGAGCCGGCCTCCATCTCCTGCAGGACTAGTCAGAGCCTCCTGCATAGTAATGGAAACGACTATTTGGATTGGTACCTGCAGAGGCCAGGGCAGTCTCCACAGCTCCTGATCTATTTGGGTTCTAATCGGGCCTCCGGGGTCCCTGACAGGTTCACTGGCAGTGGATCAGGCACAGATTTTACACTGAGTATCAGCAGAGTGGAGGCTGAGGATGTTGGGATTTATTACTGCATGCAAGGTTTACAAAGTCCATTCACTTTCGGCCCTGGGACCAAAGTGGATATCAAA
156	IML3694	Pre-vax	ADI-67795	IGHV3-30*18	IGHD2-2*01	IGHJ4*02	IGLV6-57*02	IGLJ2*01	2	1.7	S2	No						GCGAAAGATCAGACGATTCTGGTAGTACCAGTTGCCTCAATTGACTAC	AKDQTILVVPVASIDY	CAGTCTTATGATAGAACCACCTTTGTGATA	QSYDRTTFVI	CAGGTGCAGCTGGTGGAGTCTGGGGGAGGCGTGGTCCAGCCTGGGAGGTCCCTGAGACTCTCCTGTGCAGCCTCTGGATTCACCTTCAGTACCTATGGCATGCACTGGGTCCGCCAGGCTCCAGGCAAGGGGCTGGAGTGGGTGGCACTTATATCATATGATGGAAGTAATAAATACTATGCAGAGTCCGTGAAGGGCCGATTCACCGTCTCCAGAGACAGTTCCAAGAACACGGTGTATCTGCAAATGAACAGCCTGAGAGCTGAGGACACGGCTGTGTATTACTGTGCGAAAGATCAGACGATTCTGGTAGTACCAGTTGCCTCAATTGACTACTGGGGCCAAGGAACCCTGGTCACCGTCTCCTCA	AATTTTATGCTGACTCAGCCCCACTCTGTGTCGGAGTCTCCGGGGAAGACGGTAACCATCTCCTGCACCGGCAGCAGTGGCAGCATTGCCAGCAACTATGTGCAGTGGTACCAGCAGCGCCCGGGCAGTGCCCCCACCACTGTTATCTATGTGGATAACCAAAGACCCTCTGGGGTCCCTGATCGGTTCTCTGGCTCCATCGACAGCTCCTCCAACTCTGCCTCCCTCACCATCTCTGGACTGAAGCCTGAGGACGAGGCTGACTACTACTGTCAGTCTTATGATAGAACCACCTTTGTGATATTCGGCGGAGGGACCAAGCTGACCGTCCTA
157	IML3694	Pre-vax	ADI-67796	IGHV3-13*01	IGHD3-10*01	IGHJ4*02	IGKV3-15*01	IGKJ5*01	7.2	0.7	NTD	No						GCAAGAGGAGGATACTACTATGGTTCGGGAGAAGTTGACTAC	ARGGYYYGSGEVDY	CAGCAGTATAATAACTGGCCCCTGGCC	QQYNNWPLA	GAGGTGCAGCTGGTGGAGTCTGGGGGAGGCTTGGTACAGCCTGGGGGGTCCCTAAGACTCTCGTGTGCAGCCTCTGGATTCACCTTCGGTACCTACGACATACACTGGGTCCGCCAAGGTACAGGAAGAGGGCTGGAGTGGGTCTCAGCTATTGCTTCTGGTGGTGACACATACTATGCAGCCTCCGTGGAGGGCCGATTCACCGTCTCCAGAGAGGATGCCAAGAACTCCTTGTATCTTCAAATGAACAACCTGAGAGTCGGGGACACGGCTGTTTATTATTGTGCAAGAGGAGGATACTACTATGGTTCGGGAGAAGTTGACTACTGGGGCCAAGGAACCCTGGTCACCGTCTCCTCA	GAAATAGTGATGACGCAGTCTCCAGCCACCCTGTCTGTGTCTCCAGGGGAAAGAGCCACCCTCTCCTGCAGGGCCAGTCAGAGTGTTAGCAGCAACTTAGCCTGGTACCAGCAGAAACCTGGCCAGGCTCCCAGGCTGCTCATCTATGGTGCATCCACCAGGGCCACTGGTATCTCAGCCAGGTTCAGTGGCAGTGGGTCTGGGACAGAGTTCACTCTCACCATCAGCAGCCTGCAGTCTGAAGATTTTGCAGTTTATTACTGTCAGCAGTATAATAACTGGCCCCTGGCCTTCGGCCAAGGGACACGACTGGAGATTAAA
158	IML3694	Pre-vax	ADI-67797	IGHV1-18*01	IGHD3-16*02	IGHJ4*02	IGKV1-39*01	IGKJ3*01	5.4	3.8	Undefined	No						GCGAGAGACGGGCGATATTATGATAACAATTGGGGGAGTTATCAGAACTCCGCCTTTGACCAC	ARDGRYYDNNWGSYQNSAFDH	CAACAGAGTTACAGTTTCCCTCGAACG	QQSYSFPRT	CAGGTTCAGCTGGTGCAGTCTGGAGCTGAGGTGAAGAAGCCTGGGGCCTCAGTGAAGGTCTCCTGCAAGGCCTCTGGCTACACCTTTAGGAGTTATGGTATCAGCTGGGTGCGACAGGCCCCTGGACAAGGGCTTGAGTGGATGGGATGGATCAACACTAAGGATGACAACACAAACTATGCACAGGAGGTCCAGGGCAGAGTCACCATGACCACAGACGCATCCACGAGTACAGCCTACATGGAGCTGAGGAGCCTGAGATCTGACGACACGGCCGTGTATTACTGTGCGAGAGACGGGCGATATTATGATAACAATTGGGGGAGTTATCAGAACTCCGCCTTTGACCACTGGGGCCAGGGCACCCTGGTCACCGTCTCCTCA	GACATCCAGATGACCCAGTCTCCATCCTCCCTGTCTCCAGCTGTAGGAGACAGAGTCACCATCACTTGCCGGGCAAGTCAGAGCATTAGCTCCTATTTAAATTGGTATCAGCAGAAACCAGGGAAAGCCCCTAACCTCCTGATTTATGCTGCATCCACTTTGCAAAGTGGGGTCCCATCCAGGTTCACTGGCAGTGGATCTGGGACAGATTTCACTCTCACCATCAGCAGTCTGCAACCTGAAGATTTTGCAACTTACTACTGTCAACAGAGTTACAGTTTCCCTCGAACGTTCGGCCCTGGGACCAAAGTGGATATCAAA
159	IML3694	Pre-vax	ADI-67799	IGHV4-39*01	IGHD3-16*02	IGHJ4*02	IGKV1-5*03	IGKJ2*01	5	3.2	Undefined	No						GCGAGACAACACTTAAATGATTACACTTGGGGGACTTTTCGTCCGGCCGACTACTTTGACCAC	ARQHLNDYTWGTFRPADYFDH	CAACAGTATAATAGTTATTCTTTCATGTACACT	QQYNSYSFMYT	CAGCTGCAGCTGCAGGAGTCGGGCCCAGGACTGGTGAAGCCTTCGGAGACCCTGTCCCTCACGTGCCTTGTCTCTGGTGGCTCCATCAGCAGTAGTAATTACTACTGGGGCTGGATCCGCCAGCCCCCAGGGAAGGGACTGGAGTGGATTGGGAGTATGTCTTATAGTGGGACCACCTACTACAACCCGTCCCTCAAGAGGCGAGTCACCATGTCCGTGGACACGTCCAAGAACCAGTTCTCCCTGAGGCTGACCTCTGTGACCGCCGCAGACACGGCTCTCTATTACTGTGCGAGACAACACTTAAATGATTACACTTGGGGGACTTTTCGTCCGGCCGACTACTTTGACCACTGGGGCCAGGGCACCCTGGTCACCGTCTCCTCA	GACATCCAGATGACCCAGTCTCCTTCCACCCTGTCTGCATCTGTAGGAGACAGAGTCGCCATCACTTGTCGGGCCAGTCAGACTATTAGTAGCTGGTTGGCCTGGTATCAGCAGAAACCAGGGAAAGCCCCTAAGCTCCTGATCTATAAGACGTCCACTTTACAAAGTGGGGTCCCATCAAGGTTCAGCGGCAGTGGATCTGGGACAGAATTCACTCTCACCATCAGCAGCCTGCAGCCTGATGACTTTGCAACTTATCACTGCCAACAGTATAATAGTTATTCTTTCATGTACACTTTTGGCCAGGGGACCAAGCTGGAGATCAAA
160	IML3694	Pre-vax	ADI-67800	IGHV5-51*03	IGHD2-2*01	IGHJ6*02	IGKV2-24*01	IGKJ1*01	2.7	1.7	S2	No						GCGAGATCGAAGTACCAGCTTGTCTGGACGGGCTACCATCACTCCTACAATATGGACGTC	ARSKYQLVWTGYHHSYNMDV	ATGCAAGCCACACAATTTCCGTGGACG	MQATQFPWT	GAGGTGCAGCTGGTGCAGTCTGGAGCAGAGGTGAAAAAGCCGGGGGAGTCTCTGAAGATCTCCTGTCAGGGTTCTGGCTACAGCTTTAGCAGCTACTGGATCGCCTGGGTGCGCCAGATGCCCGGGAAAGGCCTGGAGTGGATGGGGATCATCTATCCTGATGACTCTGATACCAAATACAGCCCGTCCTTCCAAGGCCAGGTCACCATCTCAGCCGACAAGTCCATCAGAACCGCCTACCTTCAGTGGAGCAGCCTGAAGGCCTCGGACACCGCCATGTATTACTGTGCGAGATCGAAGTACCAGCTTGTCTGGACGGGCTACCATCACTCCTACAATATGGACGTCTGGGGGCAAGGGACCACGGTCACCGTCTCCTCA	GATATTGTGATGACCCAGACTCCACTCTCCTCACCTGTCACCCTTGGACAGCCGGCCTCCATCTCCTGCAGGTCTAGTCAAAGCCTCGTACACAGTGATGGAAACACCTACTTGAGTTGGCTTCAGCAGAGGCCAGGCCAGCCTCCCAGACTCCTACTTTATAAGATTTCTAACCGGTTCTCTGGGGTCTCAGACAGATTCAGTGGCAGTGGGGCAGGGACAGATTTCACACTGAAAATCAGCAGGGTGGAAGCTGAGGATGTCGGGGTTTATTATTGCATGCAAGCCACACAATTTCCGTGGACGTTCGGCCAAGGGACCAAGGTGGAAATCAAA
161	IML3694	Pre-vax	ADI-67801	IGHV3-30-3*01	IGHD2-2*01	IGHJ4*02	IGKV3-20*01	IGKJ2*01	3.7	2.1	S2	No						GCGAGAGTGCGAGTGCCTGCTGCTACAACCGGGTGGGCCACCTTC	ARVRVPAATTGWATF	CAGCAGTATGGTAGGTCACCTCCGGTATTCACT	QQYGRSPPVFT	CAGGTGCAGCTGGTGGAGTCTGGGGGAGGCGTGGTCCAGCCTGGGAGGTCCCTGAGACTCTCCTGTGCAGCCTCTGGATTCATCTTCAGTACCTATGCTATGCACTGGGTCCGCCAGGCTCCAGGCAAGGGGCTGGAGTGGGTGGCAGTTATCTCATATGATGGACGCAATGAATACTACGCAAACTCCGTGAAGGGCCGAGTCACCATCTCCAGAGACAATTCCAAGAACACACTTTATCTGCAAATGAACAGCCTGAGACCTGAGGACACGGCTGTCTATTACTGTGCGAGAGTGCGAGTGCCTGCTGCTACAACCGGGTGGGCCACCTTCTGGGGCCAAGGAACCCTGGTCACCGTCTCCTCA	GAAATTGTGTTGACGCAGTCTCCAGGCACCCTGTCTTTCTCTCCAGGGGAAAGAGCCACCCTCTCCTGCAGGGCCAGTCAGAGTATTAACAGCAACTACTTAGCCTGGTTCCAGCAGAAACCTGGCCAGGCTCCCAGGCTCCTCATCTATGGTGCATCCAGCAGGGCCACTGGCATCCCAGACAGGTTCAGTGGCAGTGGGTCTGGGACAGACTTCACTCTCACCATCAGCAGACTGGAGCCTGAAGATTTTGCAGTGTATTACTGTCAGCAGTATGGTAGGTCACCTCCGGTATTCACTTTTGGCCAGGGGACCAAGCTGGAGATCAAA
162	IML3694	Pre-vax	ADI-67802	IGHV3-30-3*01	IGHD2-2*01	IGHJ4*02	IGKV2-28*01	IGKJ4*01	3.7	1	Undefined	No						GCGAGAGTGCGAGTGCCTGCTGCTACAACCGGGTGGGCCACCTTC	ARVRVPAATTGWATF	ATGCAAGCTCTACAAACTCCGCTCACT	MQALQTPLT	CAGGTGCAGCTGGTGGAGTCTGGGGGAGGCGTGGTCCAGCCTGGGAGGTCCCTGAGACTCTCCTGTGCAGCCTCTGGATTCATCTTCAGTACCTATGCTATGCACTGGGTCCGCCAGGCTCCAGGCAAGGGGCTGGAGTGGGTGGCAGTTATCTCATATGATGGACGCAATGAATACTACGCAAACTCCGTGAAGGGCCGAGTCACCATCTCCAGAGACAATTCCAAGAACACACTTTATCTGCAAATGAACAGCCTGAGACCTGAGGACACGGCTGTCTATTACTGTGCGAGAGTGCGAGTGCCTGCTGCTACAACCGGGTGGGCCACCTTCTGGGGCCAAGGAACCCTGGTCACCGTCTCCTCA	GATATTGTGATGACTCAGTCTCCACTTTCCCTGCCCGTCACCCCTGGAGAGCCGGCCTCCATCTCCTGCAGGTCTAGTCAGAGCCTCCTGCATAGAAATGGATACACCTATTTGGATTGGTACCTGCAGAAGCCAGGGCAGTCTCCACAGCTCCTGATCTATTTGGGTTCTAATCGGGCCTCCGGGGTCCCTGACAGGTTCAGTGGCAGTGGATCAGGCACAGATTTTACACTGAAAATCAGCAGAGTGGAGGCTGAGGATGTTGGGGTTTATTACTGCATGCAAGCTCTACAAACTCCGCTCACTTTCGGCGGAGGGACCAAGGTGGAGATCAAA
163	IML3694	Pre-vax	ADI-67803	IGHV1-69*01	IGHD1-1*01	IGHJ4*02	IGKV3-11*01	IGKJ4*01	9.9	2.8	S2	No						GCGACAAAGGAGGTTGCAGGAACTGGAGGCGAGTTTGACTCC	ATKEVAGTGGEFDS	CAGAAGCGTAGCAACTGGCCTCCGCAACTCACT	QKRSNWPPQLT	CAGGTGCAGCTGGTGCAGTCTGGGGCTGAGGTGAAGAAGCCTGGGTCCTCGGTGAAGGTCTCCTGCAAGGCTTCTGGAGGCACCTTCAGCAGTTATGCTATCACCTGGGTGCGACAGGCCCCTGGACAAGGGCTTGACTGGATGGGAGGGATCATCCCTATCTTTGGTTCAACAAACTATGCACAGAAGTTCCAGGGCAGAGTCACGATTACCGCGGACGAATCCTCAATTGCCGCGGACAAATTGACGACCACAGCCTACATGGAGCTGAGCAGCCTGAGATCCGAGGACTCGGCCGTGTATTATTGTGCGACAAAGGAGGTTGCAGGAACTGGAGGCGAGTTTGACTCCTGGGGCCAAGGAACCCTGGTCACCGTCTCCTCA	GAAATTGTGTTGACACAGTCTCCAGGCACCCTGTTTTTGTCTCCAGGGGAAAGAGCCACCCTCTCCTGCAGGGCCAGTCAGAGTGTTAGCGACTTCTTAGCCTGGTACCAACAGAAACCTGGCCAGCCTCCCAGGCTCCTCATCTATGATGCGTCCAACAGGGCCACTGGCATCCCAGCCAGGTTCAGTGGCAGTGGGTCTGGGACAGACTTCACTCTCACCATCAGCAGCCTAGAGCCTGAAGATTTTGCAGTTTATTACTGTCAGAAGCGTAGCAACTGGCCTCCGCAACTCACTTTCGGCGGAGGGACCAAGGTGGAGATCAAA
164	IML3694	Pre-vax	ADI-67804	IGHV2-5*02	IGHD2-2*01	IGHJ4*02	IGLV1-36*01	IGLJ2*01	3	2.4	RBD	No		>1.0	>1.0	>1.0		GCACACATTTCTTGTTGTACTACTGCCAGCTACAACCCCCACTTTGACTAC	AHISCCTTASYNPHFDY	GCAACATGGGATGACAGCCTGAATGTCCCGGTA	ATWDDSLNVPV	CAGATCACCTTGAAGGAGTCTGGTCCTACGCTGGTGAAACCCACACAGACCCTCACGCTGACCTGCACCTTCTCTGGGTTCTCACTCAGCACTACTGGAGAGGGTGTGGGCTGGATCCGTCAGCCCCCCGGGAAGGCCCTGGAGTGGCTTGCACTCATTTATTGGGATGATGATAAGCGCTACAGTCCATCTCTGAAGAGCAGGCTCACCATCACCAAGGACACCTCCAAAAACCAGGTGGTCCTTACACTGACCAACATGGACTTTGTGGACACAGCCACATATTCCTGTGCACACATTTCTTGTTGTACTACTGCCAGCTACAACCCCCACTTTGACTACTGGGGCCAAGGAACCCTGGTCACCGTCTCCTCA	CAGTCTGTGCTGACTCAGCCACCCTCGGTGTCTGAAGCCCCCAGGCAGAGGGTCACCATCTCCTGTTCTGGAAGCAGCTCCAACATCGGACATAATGCTGTCAACTGGTACCAGCACCTCCCAGGAAAGGCTCCCAAACTCGTCATCTATTATGATGATCTGTTGCCCTCAGGGGTCTCTGACCGATTCTCTGCCTCCAAGTCTGGCACCTCAGCCTCCCTGGCCATCAGTGGGCTCCAGTCTGAGGATGAGGCTGATTATTACTGTGCAACATGGGATGACAGCCTGAATGTCCCGGTATTCGGCGGAGGGACCAAGCTGACCGTCCTA
165	IML3694	Pre-vax	ADI-67806	IGHV3-74*01	IGHD3-3*01	IGHJ6*02	IGKV2-28*01	IGKJ1*01	3.7	5.4	Undefined	No						GCAAGAGTCCGCGATTTTTGGAGTGGTTTTTACCCCTCTAACGGTATGGACGTC	ARVRDFWSGFYPSNGMDV	ATGCAAACTCTACAAACTCCGTGGACG	MQTLQTPWT	GAGGTGCAGCTGGTGGAGTCCGGGGGAGGCTTAGTTCGGCCGGGGGGGTCCCTGAGACTCTCCTGTGCAGCCTCTGGATTCACCTTCAGCAGTTACTGGATGCACTGGGTCCGCAAAGCTCCAGGGAAGGGGCTGGTGTGGGTCTCACGTATTAATGGTGATGGGAGCAGAACAAACTACGCGGACTCCGTGAAGGGCCGATTCACCATCTCCAGAGACAACGCCAAGAACACGCTGTATCTGCAAATGAACAGTCTGAGAGGCGAGGACACGGCTGTGTATTATTGTGCAAGAGTCCGCGATTTTTGGAGTGGTTTTTACCCCTCTAACGGTATGGACGTCTGGGGGCAAGGGACCACGGTCACCGTCTCCTCA	GATATTGTGATGACTCAGTCTCCACTCTCCAGGGGTGTCGGGCAGGGAGAGCCGGCCTCCATCTCCTGCAGGTCTAGTCAGAGCCTCCTGCATAATAATGGATTCAACTATTTGGATTGGTACCTGCAGAAGCCAGGGCAGTCTCCACAGCTCCTCATCTATTTCGGTTCTAATCGGGCCTCCGGGGTCCCTGACAGGTTCAGTGGCAGTGGATCAGGCACAGATTTTTCACTGAAAATCAGCAGAGTGGAGGCTGAGGATGTTGGGGTTTATTACTGCATGCAAACTCTACAAACTCCGTGGACGTTCGGCCAAGGGACCAAGGTGGAAATCAAA
166	IML3694	Pre-vax	ADI-67807	IGHV1-45*02	IGHD4-17*01	IGHJ4*02	IGKV2-28*01	IGKJ4*01	4.1	2	Undefined	No						GCATGTCTCGCGACTACGGAGTACTTTGACTAC	ACLATTEYFDY	ATGCAAGCTCTACAAACTCCCTTCAAC	MQALQTPFN	CAGATGCAGCTGGTGCAGTCTGGGGCTGAGGTGAAGAAGACTGGGTCCTCAGTGAAACTTTCCTGCAAGGCTTCCGGATACACCTTCACCCTCCGCAACCTACACTGGGTGCGTCAGGCCCCCGGACAAGCGCTTGAGTGGATGGGATGGATCACACCTTTCAATGGTAAAACCAACTATGCACAGAAATTCCAGGACAGAGTCACCATTACCAGGGACAGGTCCATGACCACAGCCTACATGGAGCTGAGCAGCCTGAGATCTGAAGACACAGCCATGTATTACTGTGCATGTCTCGCGACTACGGAGTACTTTGACTACTGGGGCCAAGGAACCCTGGTCACCGTCTCCTCA	GATATTGTGATGACTCAGTCTCCACTCTCCCTGCCCGTCACCCCTGGAGAGCCGGCCTCCATCTCCTGCAGGTCTAGTCAGAGCCTCCTGCAAAGTTATGGATTCAACTATTTAAATTGGTACCTGCAGAAGCCAGGGCACTCTCCACAGCTCCTGATCTATTTGGGTTCTAATCGGGCCTCCGGGGTCCCTGACAGGTTCAGTGGCAGTGGATCAGGCACAGATTTTACACTGAAAATCAGCAGAGTGGAGGCTGAGGATGTTGGGGTTTATTACTGCATGCAAGCTCTACAAACTCCCTTCAACTTCGGCGGAGGGACCAAGGTGGAGATCAAA
167	IML3694	Pre-vax	ADI-67808	IGHV1-45*02	IGHD4-17*01	IGHJ4*02	IGKV2-28*01	IGKJ3*01	4.1	2	Undefined	No						GCATGTCTCGCGACTACGGAGTACTTTGACTAC	ACLATTEYFDY	ATGCAAGCTCTACAAACTCCCTTCAAC	MQALQTPFN	CAGATGCAGCTGGTGCAGTCTGGGGCTGAGGTGAAGAAGACTGGGTCCTCAGTGAAACTTTCCTGCAAGGCTTCCGGATACACCTTCACCCTCCGCAACCTACACTGGGTGCGTCAGGCCCCCGGACAAGCGCTTGAGTGGATGGGATGGATCACACCTTTCAATGGTAAAACCAACTATGCACAGAAATTCCAGGACAGAGTCACCATTACCAGGGACAGGTCCATGACCACAGCCTACATGGAGCTGAGCAGCCTGAGATCTGAAGACACAGCCATGTATTACTGTGCATGTCTCGCGACTACGGAGTACTTTGACTACTGGGGCCAAGGAACCCTGGTCACCGTCTCCTCA	GATATTGTGATGACTCAGTCTCCACTCTCCCTGCCCGTCACCCCTGGAGAGCCGGCCTCCATCTCCTGCAGGTCTAGTCAGAGCCTCCTGCAAAGTTATGGATTCAACTATTTAAATTGGTACCTGCAGAAGCCAGGGCACTCTCCACAGCTCCTGATCTATTTGGGTTCTAATCGGGCCTCCGGGGTCCCTGACAGGTTCAGTGGCAGTGGATCAGGCACAGATTTTACACTGAAAATCAGCAGAGTGGAGGCTGAGGATGTTGGGGTTTATTACTGCATGCAAGCTCTACAAACTCCCTTCAACTTCGGCCCTGGGACCAAAGTGGATATCAAA
168	IML3694	Pre-vax	ADI-67809	IGHV3-7*01	IGHD6-19*01	IGHJ6*03	IGLV2-23*02	IGLJ3*02	5.4	4.8	S2	No						GCGAGAGAGTCAGCTTCCTCCTTCTATAGTAGTGGCTGGTACCGCTACTACTACTACATTGACGTC	ARESASSFYSSGWYRYYYYIDV	TCATATGCAACTAGTAACACTAAGCTG	SYATSNTKL	GAGGTGCAGCTGGTGGAGTCTGGGGGAGGCTTGGTCCAGCCTGGGGGGTCCCTGAGACTCTCCTGTAGAGCCTCTGGATTCACCTTTAATCACTATCGCATGACCTGGGTCCGCCAGGCTCCAGGGAAGGGGCTGGAGTGGGTGGCCAACATTAAGCAAGATGGAAGTGAGACATACTATGTGGACTCTCTGGAGGGCCGATTCATTATCTCCAGAGACAACGCCAAAAACTCACTGTCTCTGCAAATGAACAGCCTGAGAGCCGAGGACACGGCTGTGTATTACTGTGCGAGAGAGTCAGCTTCCTCCTTCTATAGTAGTGGCTGGTACCGCTACTACTACTACATTGACGTCTGGGGCAAAGGGACCACGGTCACCGTCTCCTCA	CAGTCTGCCCTGACTCAGCCTGCCTCCGTGTCTGGGTCTCCTGGACAGTCGATCACCATCTCCTGCACTGGAACCAGCAGTAATGTTGGGAGTTATAATTTTGTCTCCTGGTACCGACAGCACCCAGGCAAAGCCCCCGAACTCATCATTTATGACGTCAGTCAGCGGCCCTCAGGGGTTTCTGATCGCTTCTCTGGCTCCAAGTCTGGCAACACGGCCTCCCTGACAATCTCTGGGCTCCAGGCTGAGGACGAGGCTGATTATTACTGCTATTCATATGCAACTAGTAACACTAAGCTGTTCGGCGGAGGGACCAAGCTGACCGTCCTA
169	IML3694	Pre-vax	ADI-67810	IGHV4-31*03	IGHD3-9*01	IGHJ2*01	IGLV2-14*01	IGLJ1*01	5	2.1	S2	No						GCGAGAGGGTTGGGTGGCTACGCACATTTTGACTAC	ARGLGGYAHFDY	AGCTCATTTACAAGCAGCACCTTTTATGTC	SSFTSSTFYV	CAGGTGCAGCTGCAGGAGTCGGGCCCAGGACTGGTGAAGCCTTCACAGACCCTGTCCCTCACCTGCACTGTCTCTGGTGGCTCCGTCAGCAGTGGTGGTTACTACTGGACCTGGATCCGCCAGTTCCCAGGGAGGGGCCTGGAGTGGATTGGATACATCTACTACAGTGGGAACACCTACTACAACCCGTCCCTCAAGAGTCGACTTTCCGTATCACTAGACACGTCTCAGAACCAGTTCTCCCTGAGGCTGAGCTCTGTGACTGCCGCGGACACGGCCGTATATTACTGTGCGAGAGGGTTGGGTGGCTACGCACATTTTGACTACTGGGGCCGTGGCACCCTGGTCACTGTCTCCTCA	CAGTCTGCCCTGACTCAGCCTGCCTCCGTGTCTGGGTCTCCTGGACAGTCGATCACCATCTCCTGCACTGGAACCAGCAGTGACGTTGGTGGTTATAACTATGTCTCCTGGTACCAACTGCACCCAGTCAAAGCCCCCAAACTCATAATTTATGATGTCAGTAATCGGCCCTCAGGGGTTTCTAATCGCTTCTCTGGCTCCAAGTCTGGCAACACGGCCTCCCTGACCATCTCTGGGCTCCAGGCTGACGACGAGGCTGATTATTACTGCAGCTCATTTACAAGCAGCACCTTTTATGTCTTCGGAACTGGGACCAAGGTCACCGTCCTA
170	IML3694	Pre-vax	ADI-67813	IGHV3-11*01	IGHD3-10*01	IGHJ6*02	IGKV3-15*01	IGKJ1*01	3.4	1.8	NTD	No						GCGAGAGACTCGGGAGTAGAGTTTTATTACTACTCCGGTATGGACGTC	ARDSGVEFYYYSGMDV	CAGCAGTATCATAAGTGGCCTTTGACG	QQYHKWPLT	CAGGTGCAGCTGGTGGAGTCTGGGGGAGGCTTGGTCAAGCCTGGAGGGTCCCTGAGACTCACCTGTGAAGCCTCTGGATTCACCTTCAGTGACTACTTCATGAGTTGGATCCGCCAGGCTCCAGGGAAGGGGCTGGAGTGGGTTTCATACATTAGTGACAGTGGTAATACCATATATTACGCAGACTCTGTGAAGGGCCGATTCACCATCTCCAGGGACAACGCCAAGAACTCACTGTATCTGCAGATGAACAGCCTGAGAGCCGAGGACACGGCCGTGTATTACTGTGCGAGAGACTCGGGAGTAGAGTTTTATTACTACTCCGGTATGGACGTCTGGGGGCAAGGGACCACGGTCACCGTCTCCTCA	GAAATAGTGATGACGCAGTCTCCAGCCACCCTGTCTGTGTCTCCAGGGGAAAGAGCCACCCTCTCCTGCAGGGCCAGTCAGAGTGTTAGCAGCAACTTAGCCTGGTACCAGCAGACACCTGGCCAGGCTCCCAGGCTCCTCATCTATGGTACATCCACCAGGGCCACTGGTATCCCAGCCAGGTTCAGTGGCAGTGGGTCTGGGACAGAGTTCACTCTCACCATCAGCCGCCTGCAGTCTGAAGATTTTGCAGTTTATTACTGTCAGCAGTATCATAAGTGGCCTTTGACGTTCGGCCAAGGGACCAAGGTGGAAATCAAA
171	IML3694	Pre-vax	ADI-67814	IGHV3-33*01	IGHD3-22*01	IGHJ3*02	IGKV1-5*03	IGKJ2*03	3.4	3.2	RBD	No	0.1198	0.464	>1.0	>1.0	3.143	GCGAGAGATTTGTGGTACTATGATAGGAGTGGCTTATTAAGGCATGATGCTTTTGATGTC	ARDLWYYDRSGLLRHDAFDV	CAACAGTATAATAGTTATCTGTACAGT	QQYNSYLYS	CAGGTGCAGCTGGTGGAGTCTGGGGGAGGCGTGGTCCAGCCTGGGAGGTCCCTGAGACTCTCCTGTGCAGCGTCTGGATTCACCTTCAGTAGATTTGGCATGCATTGGGTCCGCCAGGCTCCAGGCAAGGGGCTGGAGTGGGTGGCAGTTATATCGTATGATGGAAATAATAAATACTATGCGGACTCCGTGAAGGGCCGATTCACCATCTCCAGAGACACTTCCAAGACCACGCTGTATCTGCAAATGAACAGCCTGAGAGCCGAAGACACGGCTGTCTATTACTGTGCGAGAGATTTGTGGTACTATGATAGGAGTGGCTTATTAAGGCATGATGCTTTTGATGTCTGGGGCCAAGGGACAATGGTCACCGTCTCTTCA	GACATCCAGATGACCCAGTCTCCTTCCACCCTGTCTGCATCTATAGGAGACAGAGTCAACATCACTTGCCGGGCCAGTCAGAGTATTAGTAGCTGGTTGGCCTGGTATCAGCAGAAACCAGGGAAAGCCCCTAAGCTCCTGATCTATGAGGCGTCTAATTTAGAAACTGGGGTCCCATCGAGGTTCAGCGGCCGTGGATCTGGGACAGAATTCACTCTCGCCATCAGCGGCCTGCAGCCTGATGATTTTGCAACTTATTACTGCCAACAGTATAATAGTTATCTGTACAGTTTTGGCCAGGGGACCAAGCTGGAGATCAAA
172	IML3694	Pre-vax	ADI-67816	IGHV4-39*01	IGHD3-16*02	IGHJ4*02	IGKV1-5*03	IGKJ2*01	2.7	2.8	Undefined	No		>1.0				GCGAGACAACACTTAAATGATTACACTTGGGGGACTTTTCGTCCGGCCGACTACTTTGACTTC	ARQHLNDYTWGTFRPADYFDF	CAACAATATAATAGTTATTCTTTCATGTACACT	QQYNSYSFMYT	CAGCTGCAGCTGCAGGAGTCGGGCCCAGGACTGGTGAAGACTTCGGAGACCCTGTCCCTCACCTGCACTGTCTCTGGTGACTCCATCAGCAGTAGTAGTTATTATTGGGGCTGGATCCGCCAGCCCCCAGGGAAGGGGCTGGAGTGGATTGGGAGTATCTATTATAGTGGGATCACCTACTACTACCCGTCCCTCAAGAGTCGAGTCACCATATCCGTAGACACGTCCAAAAACCAGTTCTCCCTGAAGCTGAACTCTGTGACCGCCGCAGACACGGCTGTGTATTACTGTGCGAGACAACACTTAAATGATTACACTTGGGGGACTTTTCGTCCGGCCGACTACTTTGACTTCTGGGGCCAGGGCACCCTGGTCACCGTCTCCTCA	GACATCCAGATGACCCAGTCTCCTTCCACCCTGTCTGCTTCTGTAGGTGACAGAGTCACCATCACTTGCCGGGCCAGTCAGAGTATTAGTGCCTGGTTGGCCTGGTATCAGCAGAAACCAGGGAAAGCCCCTAAGCTCCTGATCTACAAGACGTCTACTTTAGAAAGTGGGGTCCCATCAAGGTTCAGCGGCAGTGGATCTGGGACAGAATTCACTCTCACCATCAGCAGCCTGCAGCCTGATGATTTTGCAACTTATTACTGCCAACAATATAATAGTTATTCTTTCATGTACACTTTTGGCCAGGGGACCAAGCTGGAGATCAAA
173	IML3694	Pre-vax	ADI-67817	IGHV3-30*18	IGHD2-2*01	IGHJ1*01	IGLV2-8*01	IGLJ1*01	4.8	3	S2	No						GCGAAAAGTCCCGATGTGGGGATTGTAACAGTGCCAGCCTATCTTGAGAAC	AKSPDVGIVTVPAYLEN	ATCTCATATGCAGGCAGCAACAGTTTGCTG	ISYAGSNSLL	CAGGTGCAGCTGGTGGAGTCTGGGGGAGGCGTGGTCCAGCCTGGGAGGTCCCTGAGACTCTCCTGTGCAGCCTCTGGATTCACCTTCAGTTTCTATGGCATGCACTGGGTCCGCCAGGCTCCAGGCAAGGGGCTGGAGTGGGTGGCAGCTATAGCATATGATGGAAGTAATAAATTCTATGTAGACTCCGTTAAGGGCCGATTCAGCATCTCCAGAGACAATTCCAAGAACACGTTGTTTCTGCATATGGACAGCCTGAGAGCTGATGACACGGCTGTTTATTACTGTGCGAAAAGTCCCGATGTGGGGATTGTAACAGTGCCAGCCTATCTTGAGAACTGGGGCCAGGGCACCCTGGTCACCGTCTCCTCA	CAGTCTGCCCTGACTCAGCCTCCCTCCGCGTCCGGGTCTCCTGGACAGTCAGTCACGATCTCCTGCACTGGAACCAGTAGAGACGTTGGTGGTTATGACTATGTCTCTTGGTACCAACAACACCCAGGCAAAGCCCCCAAACTCATGATTTATGAGGTCAGTGAGCGGCCCTCAGGGGTCCCTGATCGCTTCTCTGGCTCCAAGTCTGGCAACACGGCCTCCCTGACCGTCTCTGGGCTCCAGGCTGAGGATGAGGCTGATTATTACTGCATCTCATATGCAGGCAGCAACAGTTTGCTGTTCGGAACTGGGACCAAGGTCACCGTCCTA
174	IML3694	Pre-vax	ADI-67819	IGHV3-30*18	IGHD2-2*01	IGHJ1*01	IGLV2-8*01	IGLJ1*01	4.8	3	S2	No						GCGAAAAGTCCCGATGTGGGGATTGTAACAGTGCCAGCCTATCTTGAGAAC	AKSPDVGIVTVPAYLEN	ATCTCATATGCAGGCAGCAACAGTTTGCTG	ISYAGSNSLL	CAGGTGCAGCTGGTGGAGTCTGGGGGAGGCGTGGTCCAGCCTGGGAGGTCCCTGAGACTCTCCTGTGCAGCCTCTGGATTCACCTTCAGTTTCTATGGCATGCACTGGGTCCGCCAGGCTCCAGGCAAGGGGCTGGAGTGGGTGGCAGCTATAGCATATGATGGAAGTAATAAATTCTATGTAGACTCCGTTAAGGGCCGATTCAGCATCTCCAGAGACAATTCCAAGAACACGTTGTTTCTGCATATGGACAGCCTGAGAGCTGATGACACGGCTGTTTATTACTGTGCGAAAAGTCCCGATGTGGGGATTGTAACAGTGCCAGCCTATCTTGAGAACTGGGGCCAGGGCACCCTGGTCACCGTCTCCTCA	CAGTCTGCCCTGACTCAGCCTCCCTCCGCGTCCGGGTCTCCTGGACAGTCAGTCACGATCTCCTGCACTGGAACCAGTAGAGACGTTGGTGGTTATGACTATGTCTCTTGGTACCAACAACACCCAGGCAAAGCCCCCAAACTCATGATTTATGAGGTCAGTGAGCGGCCCTCAGGGGTCCCTGATCGCTTCTCTGGCTCCAAGTCTGGCAACACGGCCTCCCTGACCGTCTCTGGGCTCCAGGCTGAGGATGAGGCTGATTATTACTGCATCTCATATGCAGGCAGCAACAGTTTGCTGTTCGGAACTGGGACCAAGGTCACCGTCCTA
175	IML3694	Pre-vax	ADI-67820	IGHV4-39*01	IGHD3-10*01	IGHJ6*03	IGKV3-11*01	IGKJ3*01	4	3.1	S2	No						GCGAGACTTCCCTTTTACTATGATTCGGGGAATCATTACAACTTCTACTACATGGACGTC	ARLPFYYDSGNHYNFYYMDV	CAGCAGCGTCGCATCTGGCCTCCCTCGTTCACT	QQRRIWPPSFT	CAGCTGCAGCTGCAGGAGTCGGGCCCAGGACTGGTGAAGCCTTCGGAGACCCTGTCCCTCACCTGCACTGTCTCTGGTGGCTCCATCACCAGCAATAGTTACTACTGGGGCTGGATCCGCCAGTCCCCAGGGAAGGGACTGGAGTGGATTGGGAGTATTTATTATATTGGGACCACCTACTACAACCCGTCCCCCAAGAGTCGAGTCACCATATCCGTAGACACGTCCAAGAGCCAGTTCTCCCTGAACCTGAGCTCTGTGACCGCCGCAGACTCGGCTGTGTATTACTGTGCGAGACTTCCCTTTTACTATGATTCGGGGAATCATTACAACTTCTACTACATGGACGTCTGGGGCAAAGGGACCACGGTCACCGTCTCCTCA	GAAATTGTGTTGACACAGTCTCCAGTCACCCTGTCTTTGTCTCCAGGGGAAAGAGCCACCCTCTCCTGCAGGGCCAGTCAGAATGTTAACAACCACTTAGCCTGGTACCAACAGAAACCTGGCCAGGCTCCCAGGCTCCTCATCTATGATGCATCCAACAGGGCCACTGGCATCCCAGCCAGGTTTAGTGGCAGTGGGTCTGGGACAGACTTCACTCTCACCATCAGCAGCCTAGAACCTGAAGATTTTGCAGTTTATTACTGTCAGCAGCGTCGCATCTGGCCTCCCTCGTTCACTTTCGGCCCTGGGACCAAAGTGGATATCAAA
176	IML3694	Pre-vax	ADI-67821	IGHV2-70*01	IGHD3-9*01	IGHJ5*02	IGKV3-20*01	IGKJ5*01	2.3	4.2	S2	No						GCACGGATACAACAGGCGTTTTACGATACTTTGACTGGTCCAAGGGGCTGGTTCGACCCC	ARIQQAFYDTLTGPRGWFDP	CAGCAGTATGTTAACTCAGCCACC	QQYVNSAT	CAGGTCACCTTGAGGGAGTCTGGTCCTGCGCTGGTGAAACCCACACAGACCCTCACACTGACCTGCACCTTCTCTGGGTTCTCACTCAGCACTAGTGGAGTGTCTGTGAGCTGGATCCGTCAGCCCCCAGGGAAGGCCCTGGAGTGGCTTGCACTCATTGATTGGGATGATGATAAATACTACAACACATCTCTGAAGACCAGGCTCACCATCTCCAAGGACACCTCTAAAAACCAGGTGGTCCTTACAATGACCGACATGAACCCTGTGGACACAGCCACCTATTACTGTGCACGGATACAACAGGCGTTTTACGATACTTTGACTGGTCCAAGGGGCTGGTTCGACCCCTGGGGCCAGGGAACCCTGGTCACCGTCTCCTCA	GAAATTGTGTTGACGCAGTCTCCAGGCACCCTGTCTTTGTCTCCAGGGGAAAGAGCCACCCTCTCCTGCAGGGCCAGTCAGAATGTTAACAGCAACTTCTTAGCCTGGTACCAGCAGAAACCTGGCCAGGCTCCCAGGCTCCTCATCTATACTGCATCCTACAGGGCCACTGGCATCCCAGGCAGGTTCAGTGGCAGTGGGTCTGGGACAGACTTCACTCTCACCATCAGCAGACTGGAGCCTGAAGATTTTGCAGTGTATTATTGTCAGCAGTATGTTAACTCAGCCACCTTCGGCCAAGGGACACGACTGGAGATTAAA
177	IML3694	Pre-vax	ADI-67822	IGHV4-59*01	IGHD3-16*02	IGHJ4*02	IGKV4-1*01	IGKJ1*01	1	2	NTD	No						GCGAGAGAAATAACGCGTTCAAAATAGAAATGGGTTACGTTTATATAT	AREITRSK*KWVTFIY	CAGCAATATTATAATTCTCCTCGGACG	QQYYNSPRT	CAGGTGCAGCTGCAGGAGTCGGGCCCAGGACTGGTGAAGCCTTCGGAGACCCTGTCCCTCACCTGCACTGTCTCTGGTGGCTCCATCAGTACTTACTACTGGACCTGGATCCGGCAGCCCCCAGGGAAGGGACTGGAGTGGATTGGGTATATCTATTACAGTGGGAGCACCAACTACAACCCCTCCCTCAAGAGTCGAGTCATCATATCAGTAGACACGTCCAAGAACCAGTTCTCCCTGAAGCTGAGCTCTGTGACCGCTGCGGACACGGCCGTGTATTACTGTGCGAGAGAAATAACGCGTTCAAAATAGAAATGGGTTACGTTTATATATTGGGGCCAAGGAACCCTGGTCACCGTCTCCTCA	GACATCGTGATGACCCAGTCTCCAGACTCCCTGGCTGTGTCTCTGGGCGAGAGGGCCACCATCAGCTGCAAGTCCAGCCAGAGTGTTTTATACAGCTCCAACAATAAGAACTACTTAGCTTGGTACCAGCAGAAACCACGACAGCCTCCGAAGCTGCTCATTTACTGGGCATCTACCCGGGAATCCGGGGTCCCTGACCGATTCAGTGGCAGCGGGTCTGGGGCAGATTTCACTCTCACCATCAGCAGCCTGCAGGCTGAAGATGTGGCAGTTTATTACTGTCAGCAATATTATAATTCTCCTCGGACGTTCGGCCAAGGGACCAAGGTGGAAATCAAA
178	IML3694	Pre-vax	ADI-67823	IGHV3-43*01	IGHD6-19*01	IGHJ4*02	IGKV1-39*01	IGKJ4*01	2.7	2.1	NTD	No						GCAAGAGATATAGGTCGAAGGAAGGGAGAGCAGTACTACTTTGACTAC	ARDIGRRKGEQYYFDY	CAACAGAGTTACATTACCCCGCTCACT	QQSYITPLT	GAAGTGCAGCTGGTGGAGTCTGGGGGAGTCGTGGTACAGCCTGGGGGGTCCCTGAGACTCTCCTGTGCAGCCTCTGGATTCACTTTTGATGATTATACCATACACTGGGTCCGTCAAGCTCCGGGAAAGGGTCTGGAGTGGGTCTCTGTTATTAGTTGGGATGGTGGTAGCACATACTATGCAGACTCTGTGAAGGGCCGATTCACCATCTCCAGAAACAACAGCAACAACTCCCTGTATCTGCAAATGAACAGTCTGAGAACTGAGGACACCGCCTTCTATTACTGTGCAAGAGATATAGGTCGAAGGAAGGGAGAGCAGTACTACTTTGACTACTGGGGCCAAGGAACCCTGGTCACCGTCTCCTCA	GACATCCAGATGACCCAGTCTCCATCCTCCCTGTCTGCATCTGTAGGAGACAGAGTCACCATCACTTGCCGGGCAAGTCAGAGCATTAGCAGGTATTTAAATTGGTATCAGCAGAAACCAGGGAAAGCCCCTAAGCTCCTGATCTATGCTGCATCCGGTTTGCAAAGTGGGGTCCCATCAAGGTTCAGTGGCAGTGGATCTGGGACAGATTTCACTCTCACCATCAGCAGTCTGCAACCTGAAGATTTTGCAACTTTCTGGTGTCAACAGAGTTACATTACCCCGCTCACTTTCGGCGGAGGGACCAAGGTGGAGATCAAA
179	IML3694	Pre-vax	ADI-67824	IGHV3-9*01	IGHD3-10*01	IGHJ2*01	IGKV3-15*01	IGKJ2*01	3.7	1.7	NTD	No						GCAAAAGCAGGCCCCTTGTCCCTGGGGACTCATGATTACTGGTACTTCGATCTC	AKAGPLSLGTHDYWYFDL	CAGCAGCATAATAACTGGCCTCGGACG	QQHNNWPRT	GAAGTGCAGCTGGTGGAGTCTGGGGGAGACTTGGTACAGCCTGGCAGGTCCCTGAGACTCTCCTGTGCAGCCTCTGGATTCAGCTTTGAAGATTATGCCATGCACTGGGTCCGGCAAGCTCCAGGGAAGGGCCTGGAGTGGGTCTCAGGTATTAGTTGGAATAGTGGTAGCAAAGGCTATGCGGACTCTGTGAAGGGCCGCATCACCATCTCCAGAGACAACGCCAAGAACTCCCTCTATCTGCAAATGAACAGTCTTAGACCTGAGGATACGGCCCTGTATTACTGTGCAAAAGCAGGCCCCTTGTCCCTGGGGACTCATGATTACTGGTACTTCGATCTCTGGGGCCGTGGCACCCTGGTCACTGTCTCCTCA	GAAATAGTGATGACGCAGTCTCCAGCCACCCTGTCTGTGTCTCCAGGGGAAAGAGCCACCCACTCCTGCAGGGCCAGTCAGAGTGTTAGCAGCAACTTGGCCTGGTACCAGCAGAAACCTGGCCAGGCTCCCAGGCTCCTCATCTATAGTGCATCCACCAGGGCCACTGGTATCCCAGCCAGGTTTAGTGGCAGTGGGTCTGGGACAGAGTTCACTCTCACCATCAGCAGCCTGCAGTCTGAAGATTTTGCAGTTTATTACTGTCAGCAGCATAATAACTGGCCTCGGACGTTTGGCCAGGGGACCAAGCTGGAGATCAAA
180	IML3694	Pre-vax	ADI-67825	IGHV4-34*01	IGHD4-17*01	IGHJ6*02	IGLV1-44*01	IGLJ1*01	3.8	4.1	S2	No		>1.0	>1.0			GTGAGAGGGCGTGCGGTGACTACTTTTTTCTTCTACTACGATTTGGACGTC	VRGRAVTTFFFYYDLDV	GCAGCATGGGATGACAGCCTGAATGGTTATGTC	AAWDDSLNGYV	CAGGTGCAGCTACAACAGTGGGGCGCAGGACTGTTGAAGCCTTCGGAGACCCTGTCCCTCACCTGCGCTGTCTATGGTGGGTCCTTCAGTGGTCACTACTGGAACTGGATCCGCCAGCCCCCAGGGAAGGGGCTGGAGTGGATTGGGGAAATCAATCACAGTGGAAGCAGCAACTACAACCCGTCCCTCAGGAGTCGAGTAACCATCTCAGTAGACACGTCCAAGAACCAGCTCTCCCTGAAGCTGAGTTCTGTGACCGCCGCGGACACGGCTGTGTATTACTGTGTGAGAGGGCGTGCGGTGACTACTTTTTTCTTCTACTACGATTTGGACGTCTGGGGGCAAGGGACCACGGTCACCGTCTCCTCA	CAGTCTGTGCTGACTCAGCCACCCTCAGCGTCTGGGACCCCCGGGCAGAGGGTCGCCGTCTCTTGCTCTGGAAGCAGCTCCAACATCGGAAGTCATACTGTGAACTGGTACCAGCAACTCCCAGGAACGGCCCCCAAACTCCTCATCTATAAGAATGATCAGCGGCCCTCAGGGGTCCCTGACCGATTCTCTGGCTCCAAGTCTGGCACCTCAGCCTCCCTGGCCATCAGTGGGCTCCAGTCTGAAAATGAGGGTGATTATTACTGTGCAGCATGGGATGACAGCCTGAATGGTTATGTCTTCGGAACTGGGACCAAGGTCACCGTCCTA
181	IML3694	Pre-vax	ADI-67826	IGHV3-33*01		IGHJ6*03	IGLV8-61*01	IGLJ1*01	2.7	2	Undefined	No		>1.0				GCGAGAGACCCCCAGAGAGCATACTACTACATGGACGTC	ARDPQRAYYYMDV	GTACTCTATATGGGTGGTGGCATTTGGGTC	VLYMGGGIWV	CAGGTGCAGCTGGTGGAGTCTGGGGGAGGCGTGGTCCAGCCTGGGAGGTCCCTGAGACTCTCCTGTGCAGCGTCTGGATTCACCTTCAGTGACTATGGCATGCACTGGGTCCGCCAGGCTCCAGGCAAGGGGCTGGAGTGGGTGACATTTTTATGGTATGATGGAAGTAATAAAGACTATGCAGACTCCGTGAAGGGCCGATTCACCATCTCCAGAGACAATTCCAAGAACACACTGTATTTGCAAATGAACAGCCTGAGAGCCGAGGACACGGCTGTGTATTACTGTGCGAGAGACCCCCAGAGAGCATACTACTACATGGACGTCTGGGGCAAAGGGACCACGGTCACCGTCTCCTCA	CAGACTGTGGTGACCCAGGAGCCATCGTTCTCAGTGTCCCCTGGAGGGACAGTCACACTCACTTGTGGCTTGAGCTCTGGCCCAGTCTCTACTAGTTACTACCCCAGCTGGTACCAGCAGACCCCAGGCCAGGCTCCACGCACGCTCATCTACAGCACAATCACTCGCTCTTCTGGGGTCCCTGATCGCTTCTCTGGCTCCATCCTTGGGAACAAAGCTGCCCTCACCATCACGGGGGCCCAGGCAGATGATGAATCTGATTACTACTGTGTACTCTATATGGGTGGTGGCATTTGGGTCTTCGGAACTGGGACCAAGGTCACCGTCCTA
182	IML3694	Pre-vax	ADI-67827	IGHV3-23*01	IGHD6-6*01	IGHJ6*03	IGLV2-23*02	IGLJ2*01	3.7	3.1	Undefined	No						GCGAAAGATGGGCCCGGGGGTAGTAGCTCGTCGGCATACCCTACTATCTTCCACTACTTCTACATGGACGTC	AKDGPGGSSSSAYPTIFHYFYMDV	TCATATGCAGGTAGTAGTGTTTCTTATGTGGTT	SYAGSSVSYVV	GAGGTGCAGCTGTTGGAGTCTGGGGGAGGCTTGGTACAGCCTGGGGGGTCCCTGAGACTCTCCTGTGCAGCCTCTGGATTCACCTTTAGTACTTATGCCATGAGCTGGGTCCGCCAGGCTCCAGGGAAGGGGCTGGAGTGGGTCTCAGGTCTTAGTGGTAGTGGTGGTAGTATATATTACGCAGACTCCGTGAAGGGCCGGTTCACCATCTCCAGAGACAATTCCAAGAGCACCCTGTATCTGCAAATGAACAGCCTGAGCGCCGAGGACACGGCCGTATATTACTGTGCGAAAGATGGGCCCGGGGGTAGTAGCTCGTCGGCATACCCTACTATCTTCCACTACTTCTACATGGACGTCTGGGGCAAAGGGACCACGGTCACCGTCTCCTCA	CAGTCTGCCCTGACTCAGCCTGCCTCCGTGTCTGGGTCTCCTGGACAGTCGATCACCATCTCCTGCACTGGAACCAGCAGTGATGTTGGGAGTTATAACCTTGTCTCCTGGTACCAACAGAAACCAGGCAAAGTCCCCAAACTCATCATTTTTGATGTCAGTAAGCGGCCCACAGGGGTTTCCAATCGCTTCTCTGGCTCCAAGTCTGGCAACACGGCCTCCCTGACAATCTCTGGGCTCCAGGCTGAGGACGAGGCTGAGTATTACTGCTGCTCATATGCAGGTAGTAGTGTTTCTTATGTGGTTTTCGGCGGAGGGACCAAGCTGACCGTCCTA
183	IML3694	Pre-vax	ADI-67828	IGHV4-59*01	IGHD2-2*01	IGHJ3*02	IGKV1-39*01	IGKJ1*01	4.5	2.5	S2	No		>1.0	>1.0			GCGAGACGGGGTTTAGGATATTGTGATAGTAACAACTGCCAAAGTGCTTTTGATATT	ARRGLGYCDSNNCQSAFDI	CAACAGAGTTACAGTTTCTTGTACACT	QQSYSFLYT	CAGGTGCAGCTGCAGGAGTCGGGCCCAGGACTGGTGAAGCCTTCGGAGACCCTGTCCCTCACCTGCACTGTCTCTGGTGGCTTCGTCAGTAAATACTACTGGAGCTGGATCCGGCAGCCCCCAGGAAAGGGACTGGAGTGCATCGGCTATGTCTATTCCAGTGGGAGCACCAACTACAACCCCTCCCTCAAGAGTCGAGTCACCATATCAGTAGACACGTCCAAGAACCAGTTCTCCCTGAAGCTGACCTCTGTGACCGCTGCGGACTCGGCCGTGTATTATTGTGCGAGACGGGGTTTAGGATATTGTGATAGTAACAACTGCCAAAGTGCTTTTGATATTTGGGGCCAAGGGACAATGGTCACCGTCTCTTCA	GACATCCAGATGACCCAGTCTCCATCCTCCCTGTCTGCATCTGTAGGAGACAGAGTCACCTTCACTTGCCGGGCAAGTCAGAACATTAGGACCTATTTAAATTGGTATCAGCAGAAACCAGGGCAAGCCCCTAAACTCCTGATCTATGCTGCATCCAGTTTGCAAAGTGGGGTCCCATCAAGGTTCAGTGGCAGTGGATCTGGGACAGATTTCACTCTCACCATCAGCAGTCTGCAACCTGAAGATTTTGCAACTTACTTCTGTCAACAGAGTTACAGTTTCTTGTACACTTTCGGCCAAGGGACCAAGGTGGAAATCAAA
184	IML3694	Pre-vax	ADI-67830	IGHV4-31*03	IGHD6-13*01	IGHJ4*02	IGLV3-1*01	IGLJ2*01	5.7	3.2	S2	No						GCGAGAGGCAGCAGCTGGCGAAATGGGCACTTTGACTAC	ARGSSWRNGHFDY	CAGGCGTGGGTCAGCAGCACTGTGTTT	QAWVSSTVF	CAGGTGCAGCTGCAGGAGTCGGGCCCAGGACTGGTGAAGCCCTCACAGACCCTGTCCCTCAGCTGCACTGTCTCTGGTGGCTCCATCAGTAGTGGTGGTTACTACTGGACCTGGATCCGCCAGCACCCAGGGAAGGGCCTCGAGTGGATTGGCAACATCCATTACACTGGGAGCACCTCCTACAACCCGTCCCTCAAGAGTCGACTTACGATATCAGTAGACACGTCTAAGAGCCATTTCTCCCTGAGGCTGAGCTCTGTGACTGCCGCGGACACGGCCGTCTATTTCTGTGCGAGAGGCAGCAGCTGGCGAAATGGGCACTTTGACTACTGGGGCCAAGGAACCCTGGTCACCGTCTCCTCA	TCCTATGAGCTGACTCAGCCACCCTCAGTGTCCGTGTCCCCAGGACAGACAGCCAACATCACCTGCTCTGGAGATAAATTGGGGGATAAATATGCCTGCTGGTATCAGCAGAAGCCAGGCCAGTCCCCTGTGTTGGTCATCTATCAGGATACCAGGCGGCCCTCAGGGATCCCTGAGCGATTCTCTGGCTCCAACTCTGGGAACACAGCCACTCTGACCATCAGGGGGACTCAGGCTATGGATGAGGCTGACTATTACTGTCAGGCGTGGGTCAGCAGCACTGTGTTTTTCGGCGGAGGGACCAAGCTGACCGTCCTA
185	IML3694	Pre-vax	ADI-67831	IGHV3-49*03	IGHD4-17*01	IGHJ4*02	IGKV3-15*01	IGKJ2*03	2.4	0.7	RBD	No		0.009	>1.0	0.8322		ACCCTTACGGTGACTAACAGGTACTACTTTCACTCC	TLTVTNRYYFHS	CAGCAGTATAATAACTGGTTCAGT	QQYNNWFS	GAGGTGCAGCTGGTGGAGTCTGGGGGAGGCTTGGTACAGCCAGGGCGGTCCCTGAGACTCTCCTGTACAGCTTCTGCATTCACCTCTGGTGATTATGCTATGAGCTGGTTCCGCCAGGCTCCAGGGAAGGGGCTGGAGTGGGTAGGCTTCATTAGAAGCAAAGCTTTTGGTGGGACAACACAATACGCCGCGTCTGTGAAAGGCAGATTCACCATCTCAAGAGATGATTCCAAAAGCATCGCCTATCTGCAGATGAACAGCCTGAAAACCGAGGACACAGCCGTGTATTACTGCACCCTTACGGTGACTAACAGGTACTACTTTCACTCCTGGGGCCAGGGCACCCTGGTCACCGTCTCCTCA	GAAATAGTGATGACGCAGTCTCCAGCCACCCTGTCTGTGTCTCCAGGGGAAAGAGCCACCCTCTCCTGCAGGGCCAGTCAGAGTGTTAGCAGCAACTTGGCCTGGTACCAGCAGAAACCTGGCCAGGCTCCCAGGCTCCTCATCTATGGTGCATCCACCAGGGCCACTGGTATCCCAGCCAGGTTCAGTGGCAGTGGGTCTGGGACAGACTTCACTCTCACCATCAGCAGCCTGCAGTCTGAAGATTTTGCAGTTTATTACTGTCAGCAGTATAATAACTGGTTCAGTTTTGGCCAGGGGACCAAGCTGGAGATCAAA
186	IML3694	Pre-vax	ADI-67832	IGHV3-30*03	IGHD2-15*01	IGHJ6*02	IGKV1-39*01	IGKJ3*01	1	1.4	S2	No						GCGAGAGGGCGCGGCGGTGGCTACTACTACGGTATGGACGTC	ARGRGGGYYYGMDV	CAACAGAGTTACACTACGGTCACT	QQSYTTVT	CAGGTGCAGCTGGTGGAGTCTGGGGGAGGCGTGGTCCAGCCTGGGAGGTCCCTGAGACTCTCCTGTGCAGCCTCTGGATTCACCTTCAGTACCTATGGCATGCACTGGGTCCGCCAGGCTCCAGGCAAGGGGCTGGAGTGGGTGGCACTTATATCATATGATGGAAGTAATAAATACTATGCAGACTCCGTGAAGGGCCGATTCACCATCTCCAGAGACAATTCCAAGAACACGCTGTATCTGCAAATGAACGGCCTGAGAGCTGAGGACACGGCTGTGTATTACTGTGCGAGAGGGCGCGGCGGTGGCTACTACTACGGTATGGACGTCTGGGGGCAAGGGACCACGGTCACCGTCTCCTCA	GACATCCAGATGACCCAGTCTCCATCCTCCCTGTCTGCATCTGTAGGAGACAGAGTCACCATCACTTGCCGGGCAAGTCAGAGCATTAGCAGCTATTTAAATTGGTATCAGCAGAAACCAGGGAAAGCCCCTAAGCTCCTGATCTATGCTGCATCCAGTTTGCAAAGTGAAGTCCCATCGAGGTTCAGTGGCAGTGGATCTGGGACAGATTTCACTCTCACCATCAGCAGTCTGCAACCTGAAGATTTTGCAACTTACTACTGTCAACAGAGTTACACTACGGTCACTTTCGGCCCTGGGACCAAAGTGGATATCAAA
187	IML3694	Pre-vax	ADI-67833	IGHV5-51*03	IGHD3-3*01	IGHJ6*02	IGKV3-20*01	IGKJ1*01	2.4	3.5	S2	No						GCGAGACTCTCCTCATTGACGTATTACCCTTTTTCTTACGCTTTGGACGTC	ARLSSLTYYPFSYALDV	CAGCAGTATGGGAGCTCACGGGGGACG	QQYGSSRGT	GAGGTGCAGCTGGTGCAGTCTGGAGCAGAGGTGAAAAAGCCGGGGGAGTCTCTGAAGATCTCCTGTAAGGGTTCTGGATATAGCTTTACCGACAAGTGGATCGCCTGGGTGCGCCAGATGCCCGGGAAAGGCCTGGAGTGGATGGGAATCATCTATCCTGGTGACTCTGATACCAGATACAGCCCGTCCTTCCAAGGCCAGGTCACCATCTCAGCCGACAAGTCCATCAGCACCGCCTACCTGCAGTGGAGCAGCCTGAAGGCCTCGGACACCGCCATGTATTACTGTGCGAGACTCTCCTCATTGACGTATTACCCTTTTTCTTACGCTTTGGACGTCTGGGGGCAAGGGACCACGGTCACCGTCTCCTCA	GAAATTGTGTTGACGCAGTCTCCAGGCACCCTGTCTTTGTCTCCAGGGGAAAGAGCCACCCTCTCCTGCAGGGCCAGTCAGAGTGTTAGCAGCAGCTCCTTAGCCTGGTACCACCAGAAACCTGGCCAGGCTCCCAGACTCCTCATCTTTGCTGCATCCACTAGGGCCACTGGCATCCCAGACAGGTTCAGTGGCAGTGGGTCTGGGACAGACTTCACTCTCACCATCAGCAGACTGGAGCCTGAAGATTTTGCATTTTATTACTGTCAGCAGTATGGGAGCTCACGGGGGACGTTCGGCCAAGGGACCAAGGTGGAAATCAAA
188	IML3694	Pre-vax	ADI-67835	IGHV4-39*01	IGHD3-10*01	IGHJ4*02	IGLV1-51*01	IGLJ1*01	6.7	4.4	RBD	No						GCGAGACATGAAGTTCATTGGGAGGTATTTCCGCCGACCAGAGGGGAAGTTGACTAC	ARHEVHWEVFPPTRGEVDY	GCTTGGGATAGCAGCCTGAGTGCTTTTATC	AWDSSLSAFI	CAGCTGCAGCTGCAGGAGTCGGGCCCAGGACTGGTGAAGACTTCGGAGACCCTGTCCCTCACCTGCACTGTCTCTGGTGGCTCCATCACCGCTGGGAGTTACTACTGGGGCTGGATCCGCCAGCCCCCAGGGAAGGGGCTGGAGTGGATTGGCAATATCTATTATAGTGGGACCACCTACTACAACCCGTCCCTGGAGAGTCGAGTCACCATTTCCGCTGACACGTCCAAAAACCAGCTCTCCCTAAAACTGAGGTCTGTGACCGCCGCAGACACGGCTGTGTATTTCTGTGCGAGACATGAAGTTCATTGGGAGGTATTTCCGCCGACCAGAGGGGAAGTTGACTACTGGGGCCAAGGAACCCTGGTCACCGTCTCCTCA	CAGTCTGTGTTGACGCAGCCGCCCTCAGTGTCTGCGGCCCCACGCCAGAGGGTCACCATCTCCTGCTCTGGAAGCAGCTCCAGTATTGGAAATACTTATGTATCTTGGTACCAGCACCTCCCAGGAACAGCCCCCAAACTCCTCATTTATGACAATAATAAGCGACCCTCAGGGATTCCTGACCGATTCTCTGGCTCCACGTCTGGCACGTCGGCCACCCTGGGCATCACCGGACTCCAGACTGGGGACGAGGCCGATTATTACTGCGGAGCTTGGGATAGCAGCCTGAGTGCTTTTATCTTCGGAACTGGGACCAAGGTCACCGTCCTA
189	IML3694	Pre-vax	ADI-67836	IGHV3-30*18	IGHD3-10*01	IGHJ6*03	IGKV1-5*03	IGKJ1*01	9.9	4.2	Undefined	Yes						GCGAAACGGGGAGGCCCTTTCGAGTTACGCGACTACTACTACATGGACGTC	AKRGGPFELRDYYYMDV	CAACAGTATAAGAATTACTCTCCCTGGGCG	QQYKNYSPWA	CAGGTGCAGCTGGTGGAGTCTGGGGGAGGCGTGGTCCAGCCTGGGAGGTCCCTGAGACTCTCCTGTGTAGTCTCTGGATTCAATTCCAATAATTATGGCATGTACTGGGTCCGCCAGGCTCCAGGCAAGGGGCTGGAGTGGGTGGCAGCTATCTCATATGAGGGAAGTCTTCAGTACTATGCAGACTCCGTGAAGGGCCGATTCACCATCTCCAAAGAAGATTCGAAGAATTCGGTCTATTTGCAAATGCACAGCCTGAGAGCTGACGACACGGCTGTATATTTCTGTGCGAAACGGGGAGGCCCTTTCGAGTTACGCGACTACTACTACATGGACGTCTGGGGCAAAGGGACCACGGTCACCGTCTCCTCA	GACATCCAGATGACCCAGTCTCCTTCCACCCTGTCTGCATCTGTAGGAGACAGAGTCACCATCACTTGCCGGGCCAGTCAGAGTGTTAGTAGTTGGTTGGCCTGGTATCAGCAGAAACCAGGGAAAGCCCCTAACCTCCTGATCTATAAGGCGTCTACTTTAAAAAGTGGGGTCCCATCACGGTTCAGCGGCAGTGGATCGGGGACAGAATTTACTCTCACCATCAGCAGCCTGCAGCCTGATGATTTTGCAACTTATTATTGCCAACAGTATAAGAATTACTCTCCCTGGGCGTTCGGCCAAGGGACCAAGGTGGAAATCAAA
190	IML3694	Pre-vax	ADI-67837	IGHV4-34*01	IGHD2-2*01	IGHJ6*02	IGKV3-20*01	IGKJ1*01	5.5	2.1	Undefined	No						GTGAGAGGCAGGCCCATCAGTACCCTTTTCTACTACGACTATGGTATGGACGTC	VRGRPISTLFYYDYGMDV	CTGCATTATGGTAGCTCACCTCTGTACACT	LHYGSSPLYT	CAGGTGCAGCTACAACAGTGGGGCGCAGGACTGTTGAAGCCTTCGGAGACCCTGTCCCTCACCTGCGCTGTCTATGGTAGGTCCTTCAATAATTACTACTGGACCTGGATCCGCCAGCCCCCAGGGAAGGGGCTGGAGTGGATTGGGGAAATCAGTCAAAGTGGAAGCAGCAACTGCAACCCGTCCCTCAAGAGTCGAGTCACCATTTCAGTGGACACGTCCAAGAATCAGCTCTCCCTGAAGCTGAGCTCTGTGACCGCCGCGGACGCGGCTGTGTATTACTGTGTGAGAGGCAGGCCCATCAGTACCCTTTTCTACTACGACTATGGTATGGACGTCTGGGGGCAAGGGACCACGGTCACCGTCTCCTCA	GAAATTGTGTTGACGCAGTCTCCAGGCACCCTGTCTTTGTCTCCAGGGGAAAGAGCCACCCTCTCCTGCAGGGCCAGTCAGAGTGTTAGTAGCAGGTACTTAGCCTGGTACCAGCAAAAACCTGGCCAGGCTCCCAGGCTCCTCATCTATGGTGCATCCAGCAGGGCCACTGGCATCCCAGACAGGTTCAGTGGCAGTGGGTCTGGGACAGACTTCACTCTCACCATCAACAGACTGGAGCCTGAAGATTTTGCAGTGTATTACTGTCTGCATTATGGTAGCTCACCTCTGTACACTTTCGGCCAAGGGACCAAGGTGGAAATCAAA
191	IML3694	Pre-vax	ADI-67838	IGHV4-61*11	IGHD3-3*01	IGHJ6*02	IGLV1-44*01	IGLJ7*01	3.4	4.4	Undefined	No		0.6527	>1.0	0.987		GCAGGCGATTTTTGGAACCCCCCTTGGGACGTC	AGDFWNPPWDV	GCAGCATGGGATGACAGTCTGAATAGTCGGCAG	AAWDDSLNSRQ	CAGGTGCAGCTGCAGGAGTCGGGCCCAGGACTGGTGAAGCCTTCACAGACCCTGTCCCTCACCTGCACTGTCTCTGGTGGCTCCATCAGAAGTGGTATTTACTACTGGTACTGGATCCGGCAGCCCGCCGGGAAGGGACTGGAGTGGATTGGGCGTATCTATCCCAGTGGGATCAGCGACTACAACCCCTCCCTCAAGAGTCGAGTCACCATGTCAGTAGACACGTCCAAAAACCAGTTCTCCCTGAAGCTGAGCTCTGTGACCGCCGCAGACACGGCCGTGTATTTCTGTGCAGGCGATTTTTGGAACCCCCCTTGGGACGTCTGGGGGCAAGGGACCACGGTCACCGTCTCCTCA	CAGTCTGTGCTGACTCAGCCACCCTCAGCGTCTGGGACCCCCGGGCAGAGGGTCGCCATCTCTTGTTCTGGAAGCAGCTCCAACGCCGGAAGGAATACTGTCAACTGGTACCAGCAGGTCCCCGGAACGGCCCCCAAACTCCTCATCTATAAGAATGATCAGCGGCCCTCAGGGGTCCCTGACCGATTCTCTGGCTCCAAGTCTGGCACCTCAGCCTCCCTGGCAATCAGTGGGCTCCAGTCTGAGGATGAGGCTGATTATTACTGTGCAGCATGGGATGACAGTCTGAATAGTCGGCAGTTCGGAGGAGGCACCCAGCTGACCGTCCTC
192	IML3694	Pre-vax	ADI-67839	IGHV3-30-3*01	IGHD1-26*01	IGHJ4*02	IGKV3-20*01	IGKJ1*01	3.4	1.7	S2	No						GCGCGAATGTCCAGTGGGAGCTACCAAGGGTACTTTGACTAC	ARMSSGSYQGYFDY	CAGCAGTATGGTAGTTTACCTGTGACG	QQYGSLPVT	CAGGTGCAGCTGGTGGAGTCTGGGGGAGGCGTGGTCCAGCCTGGGAGGTCCCTGAGACTCTCCTGTGCAGCCTCTGGATTCACCTTCCGTGGCTATGCTATATACTGGGTCCGCCAGGCTCCAGGCAAGGGGCTGGAGTGGGTGGCAGTTATATCATATGATGGCATCAATAAATACTACGCAGACTCCGTGAAGGGCCGATTCACCATCTCCAGAGACAATTCCAAGAACACGTTGTATCTGCAAATGAACAGCCTGACAGCTGAAGACACGGCTGTGTATTACTGTGCGCGAATGTCCAGTGGGAGCTACCAAGGGTACTTTGACTACTGGGGCCAAGGAACCCTGGTCACCGTCTCCTCA	GAAATTGTGTTGACGCAGTCTCCAGGCACCCTGTCTTTGTCTCCAGGGGAAAGAGCCACCCTCTCCTGCAGGGCCAGTCAGAGTGTTAGCAACGGCTACTTAGCCTGGTACCAGCAGAAACCTGGCCAGGCTCCCAGGCTCCTCATCTATGGTGCATCCAGCAGGGCCACTGGCATCCCAGACAGGTTCAGTGGCAGTGGGTCTGGGACAGACTTCACTCTCACCATCAGCAGACTGGAGCCCGAAGATTTTGCAGTGTATTACTGTCAGCAGTATGGTAGTTTACCTGTGACGTTCGGCCAAGGGACCAAGGTGGAAATCAAA
193	IML3694	Pre-vax	ADI-67840	IGHV5-51*03	IGHD3-16*02	IGHJ6*02	IGKV2-28*01	IGKJ1*01	4.8	1.3	Undefined	No						GCGAGATTTGGGATTGGGCTCTATTATTACGGTATGGACGTC	ARFGIGLYYYGMDV	CTGCAAGCTCTACAAACTCCTCGAACG	LQALQTPRT	GAGGTGCAGCTGGTGCAGTCTGGAGCAGAGGTGAAAAAGCCGGGGGAGTCTCTGAAGATCTCCTGTAAGGGTTCTGGATACACGTTTTCCAAGTACTGGATCGCCTGGGTGCGCCAGATGCCCGGGAAAGGCCTGGAGTTGATGGGGATCATCTATCCAGGTGACTCTGATACCAGATACAACCCGTCCTTCCAAGGCCAGGTCACCATCTCAGCCGACCAGTCCATCAGTACCGCCTTCCTGCAGTGGAGCAGCCTGAAGGCCTCGGACACCGCCATGTATTTTTGTGCGAGATTTGGGATTGGGCTCTATTATTACGGTATGGACGTCTGGGGGCAAGGGACCACGGTCACCGTCTCCTCA	GATATTGTGATGACTCAGTCTCCACTCTCCCTGCCCGTCACCCCTGGAGAGCCGGCCTCCATCTCCTGCAGGTCTAGTCAGAGCCTCCTGCATAGTAATGGATACAACTATTTGGATTGGTACCTGCAGAAGCCAGGGCAGTCTCCACAGCTCCTGATCTATTTGGGTTCTAATCGGGCCTCCGGGGTCCCTGACAGGTTCAGTGGCACTGGATCAGGCACAGATTTTACACTTAAAATCAGCAGAGTGGAGGCTGAGGATGTTGGGATTTATTACTGCCTGCAAGCTCTACAAACTCCTCGAACGTTCGGCCAAGGGACCAAGGTGGAAATCAAA
194	IML3694	Pre-vax	ADI-67842	IGHV4-59*01	IGHD3-3*01	IGHJ6*02	IGLV2-8*01	IGLJ2*01	3.7	1.7	Undefined	No						GCGAGAGTGGGGGGAGCGTATTACGATTTTTGGAGTGGTCACCCCCCTGTCTTCTACGTTATGGACGTC	ARVGGAYYDFWSGHPPVFYVMDV	AGCTCATATGCAGGCAGCAACAATCGTGTGGTA	SSYAGSNNRVV	CAGGTGCAGCTGCAGGAGTCGGGCCCAGGACTGGTGAAGCCTTCGGAGACCCTGTCCCTCACCTGCACTGTCTCTGGTGGCTCCATCAGTAGTTACTACTGGAGTTGGATCCGGCAGCCCCCAGGGAAGGGACTGGAGTGGATTGGGTATATTCATTACAGTGGGAGCACCAACTACAACCCCTCCCTCAGCCTCAAGAGTCGAGTCACCATATCACTAGACACGTCCAAGAACCAGTTCTCCCTGAAGCTGAGCTCTGTGACCGCTGCGGACACGGCCGTGTACTACTGTGCGAGAGTGGGGGGAGCGTATTACGATTTTTGGAGTGGTCACCCCCCTGTCTTCTACGTTATGGACGTCTGGGGGCAAGGGACCACGGTCACCGTCTCCTCA	CAGTCTGCCCTGACTCAGCCTCCCTCCGCGTCCGGGTCTCCTGGACAGTCAGTCACCATCTCCTGCACTGGAACCAGCAGTGACGTTGGTGGTTATAACTGTGTCTCCTGGTACCAACAGCCCCCAGGCAAAGCCCCCAAAGTCATTATTTATGAGGTCAATAAGCGGCCCTCAGGGGTCCCTGATCGCTTCTCTGGCTCCAAGTCTGGCAACACGGCCTCCCTGACCGTCTCTGGGCTCCAGGCTGAGGATGAGGCTGATTATTACTGCAGCTCATATGCAGGCAGCAACAATCGTGTGGTATTCGGCGGAGGGACCAAGCTGACCGTCCTA
195	IML3694	Pre-vax	ADI-67843	IGHV4-30-2*01	IGHD2-2*01	IGHJ4*02	IGLV3-1*01	IGLJ2*01	5.7	3.6	S2	No						GCCAGATTCAGTACGTACTACCTTGACCAC	ARFSTYYLDH	CAGGCGTGGGACACCAGCACCGTGGTA	QAWDTSTVV	CAGCTGCAGCTGCAGGAGTCCGGCTCAGGACTGGTGAAGCCTTCACAGACCCTGTCCCTCACCTGCGTTGTTTCTGGTGGCTCCATCAGCAGTGGTGGTTATTCCTGGAGCTGGATCCGGCAGCCACCAGGGAAGGGCCTGGAGTGGGTTGGGCACATCTATCTTGATGGAAGTAGGTACTACAACCCGTCCCTCAAGAGTCGAGTCGCCATATCAGTAGACAGGTCCAAAAACCAATTCTCCCTGAAGCTGACCTCTGTGACCGCCGCGGACACGGCCATGTATTACTGTGCCAGATTCAGTACGTACTACCTTGACCACTGGGGCCAGGGCACCCTGGTCACCGTCTCCTCA	TCCTATGAGCTGACTCAGCCACCCTCAATGTCCGTGTCCCCAGGACAGACAGGCAGCATCACCTGCTCTGGAGATAAATTGGGAGAAAAATATGTTTGCTGGTATCAGCAGAAGCCAGGCCAGTCCCCTGTGTTGGTCATCTATCAAGACAACAAGCGGCCCTCAGGGATCCCTGAGCGATTCTCTGGCTCCAACTCTGGGAACACAGCCACTCTGACCATCAGCGGGACCCAGGCTATGGATGAGGCTGACTATTATTGTCAGGCGTGGGACACCAGCACCGTGGTATTCGGCGGAGGGACCAAGCTGACCGTCCTA
196	IML3694	Pre-vax	ADI-67844	IGHV4-34*01	IGHD4-17*01	IGHJ6*02	IGLV1-47*01	IGLJ3*02	3.8	2.7	Undefined	No						ATGAGAGGCCGGACGGTGACTACGTTCTTCTACTACTACGATATGGACGTC	MRGRTVTTFFYYYDMDV	GCAGGATGGGATGACAGCCTGAGTGGTTGGGTG	AGWDDSLSGWV	CAGGTGCAGCTACAACAGTGGGGCGCAGGACTGTTGAAGCCTTCGGAAACCCTGTCCCTCACCTGCGCTGTCTATGGTGGGTCCTTCAGTAATAATTACTGGAACTGGATTCGCCAGCCCCCAGGGAAGGGGCTGGAGTGGATTGGGGAAATCAATCATAGTGGAAGCACCAACTACAACCCGTCCCTGAAGAGTCGAGTCACCATATCAGTAGACACGTCCAAGAACCAGTTCTCCCTGAAGCTGAGCTCTGTGACCGCCGCGGACACGGCTGTGTATTACTGTATGAGAGGCCGGACGGTGACTACGTTCTTCTACTACTACGATATGGACGTCTGGGGGCAAGGGACCACGGTCACCGTCTCCTCA	CAGTCTGTGCTGACTCAGCCACCCTCAGCGTCTGGGACCCCCGGGCAGAGGGTCACCATCTCTTGTTCTGGAAGCAGCTCCAACATCGGAAGTAATAATGTTTACTGGTACCAGCAGTTCTCAGGAACGGCCCCCAGACTCCTCATCTATAGGAATAATCAGCGGCCCTCAGGGGTCCCTGACCGATTCTCTGACTCCAAGTCTGGCACCTCAGCCTCCCTGGCCATCAGTGGGCTCCGGTCCGAGGATGAGGCTGATTATTATTGTGCAGGATGGGATGACAGCCTGAGTGGTTGGGTGTTCGGCGGAGGGACCAAGCTGACCGTCCTA
197	IML3695	Pre-vax	ADI-67847	IGHV3-23*01	IGHD2-21*02	IGHJ4*02	IGLV2-14*01	IGLJ2*01	7.4	5.1	S2	Yes						GCGAAAGAGGCTTGGGGGGGTGTAATGGTGACTGCTTGGGACTAC	AKEAWGGVMVTAWDY	AGTTCATTTACAAGCAGTACCACTCCGATT	SSFTSSTTPI	GAGGTGCAGCTGTTGGAGTCTGGGGGAGGGTTGGTACAGCCTGGGGGGTCCCTGGGACTCTCCTGTGCAGCCTCTGGATTCACCTTTAGCCTCTATGCCATTTCCTGGGTCCGCCAGGCTCCAGGGAAGGGGCTGGAGTGGGTCTCCACTATTACTGCTGGTGGTCGTACCACATACTACGCAGACTCCGTGAAGGGCCGATTCACCATTTCCAGAGACAATTCCAAGAACACACTTTATTTGCACATGAACACCCTGAGAGCCGAGGACACGGCCGTATATTACTGCGCGAAAGAGGCTTGGGGGGGTGTAATGGTGACTGCTTGGGACTACTGGGGCCAAGGAACCCTGGTCACCGTCTCCTCA	CAGTCTGCCCTGACTCAGCCTGCCTCCGTGTCTGGGTCTCCTGGACAGTCGATCACCATCTCCTGCACTGGAACCAACAGTGACGTTGGTGCTTATAATTATGTCTCCTGGTACCAACAGCACTCAGACAAAGCCCCCAAACTCCTGATTTATGATGTCAGTAATCGGCCCTCAGGGGTTTCTAATCGCTTCTCTGGCACCAAGTCCGGCAACACGGCCTCCCTGACCATCTCTGGGCTCCGGGCTGACGACGAGGCTGATTATTACTGCAGTTCATTTACAAGCAGTACCACTCCGATTTTCGGCGGAGGGACCAAGCTGACCGTCCTA
198	IML3695	Pre-vax	ADI-67848	IGHV3-30*03	IGHD6-19*01	IGHJ4*02	IGLV2-14*03	IGLJ1*01	3.8	2.4	Undefined	No						GCGACCACGCTAATGGGCCAGCAGTGGCGGACTGACTAC	ATTLMGQQWRTDY	AGCTCATATACAACGAGCAGCACCCTCTATGTC	SSYTTSSTLYV	CAGGTGCAGCTGGTGGAGTCTGGGGGAGGCGTGGTCCAGCCTGGGAGGTCCCTGAGACTCTCCTGTGCAGCCTCTGGATTCACCTTCAGTGACTATGGCATGCACTGGGTCCGCCAGGCTCCAGGCAAGGGGCTGGAGTGGGTGGCAGTAATATCATACGATGGAAATAATAAATATTATGCAGACTCCGTGAAGGGCCGATTCACCATCTCCAGAGACAATTCCAAGAACACGCTGTATCTGCAAATGAACAGCCTGAGAGGCGCAGACACGGCCGTGTATTACTGTGCGACCACGCTAATGGGCCAGCAGTGGCGGACTGACTACTGGGGCCAAGGAACCCTGGTCACCGTCTCCTCA	CAGTCTGCCCTGACTCAGCCTGCCTCCGTGTCTGGGTCTCCTGGACAGTCGATCACCATCTCCTGCACTGGAGCCAGCAGTGACGTTGGTGGTTATAACTCTGTCTCCTGGTACCAACAACACCCAGGCAAAGCCCCCAAACTCATGATTTATGATGTCAGTATTCGGCCCTCAGGGGTTTCTAGTCGCTTCTCTGGCTCCAAGTCTGGCAACACGGCCTCCCTGACCATCTCTGGGCTCCAGGCTGAGGACGAGGCTGATTATTACTGCAGCTCATATACAACGAGCAGCACCCTCTATGTCTTCGGAACTGGGACCAAGGTCACCGTCCTA
199	IML3695	Pre-vax	ADI-67850	IGHV3-21*01	IGHD5-12*01	IGHJ6*02	IGKV1-12*01	IGKJ1*01	3.7	1.1	RBD	No	0.4646	0.6202	>1.0	>1.0	5.653	GCGAGAGACCAAGATAGTGGCTACGATTATGGGTTTAGTCACTTCTATTATGGTCTGGACGTC	ARDQDSGYDYGFSHFYYGLDV	CAACAGGGTAACAGTTTCCCCTGGACG	QQGNSFPWT	GAGGTGCAGCTGGTGGAGTCTGGGGGAGGCCTGGTCAAGCCGGGGGGGTCCCTGAGACTCTCCTGTGCTGCCTCTGGATTCACCTTCAGGAGTCATAGCATCAACTGGGTCCGCCAGGCTCCAGGGAAGGGGCTGGAGTGGGTCTCATCCATTAGTAGTACTAGTAATTACATATATTACGCAGACTCAGTGAAGGGCCGATTCACCATCTCCAGAGACAACGCCAAGAACTCACTGTATTTGCAAATGCACAGCCTGAGAGCCGAGGACACGGCTGTGTATTACTGTGCGAGAGACCAAGATAGTGGCTACGATTATGGGTTTAGTCACTTCTATTATGGTCTGGACGTCTGGGGGCAAGGGACCACGGTCACCGTCTCCTCA	GACATCCAGATGACCCAGTCTCCATCTTCCGTGTCTGCATCTGTTGGAGACAGAGTCACCATCACTTGTCGGGCGAGTCAGGGTATTAGCAGCTGGTTAGCCTGGTATCAGCAGAAACCAGGGAAAGCCCCTAAGCTCCTGATCTATGCTGCATCCAGTTTGCAAAGTGGGGCCCCATCAAGGTTCAGCGGCAGTGGATCTGGGACAGATTTCACTCTCACCATCAGCAGCCTGCAGCCTGAAGATTTTGCAACTTACTATTGTCAACAGGGTAACAGTTTCCCCTGGACGTTCGGCCAAGGGACCAAGGTGGAAATCAAA
200	IML3695	Pre-vax	ADI-67851	IGHV3-30*03	IGHD6-19*01	IGHJ4*02	IGLV2-14*01	IGLJ1*01	6.8	4.4	Undefined	Yes						GCGACCACCCTGATGGGCCAGCAGTGGCGGACTGACTAC	ATTLMGQQWRTDY	AGTTCATATACACGCAGCAGCACCCTCTATGTC	SSYTRSSTLYV	CAGGTGCAGCTGGTGGAGTCTGGGGGAGGCGTGGTCCAGCCTGGGGGGTCCGTGAGACTCTCTTGTGCAGCCTCTGGATCAACCTTCGGTAGTTATGGCATGCACTGGGTCCGCCAGGCTCCAGGCAAGGGGCTGGAATGGGTGGCAGTTATTTCATATGATGGAAACAACAAATATTATGCAGACTCCGTGAGGGGCCGATTCACCATCTCCAGAGACAATTCCATGAACACGCTGTATTTACAAATGAACAGCCTGAGCGGTGAGGACACGGCTATGTATTACTGTGCGACCACCCTGATGGGCCAGCAGTGGCGGACTGACTACTGGGGCCAAGGAACCCTGGTCACCGTCTCCTCA	CAGTCTGCCCTGACTCAGCCTGCCTCCGTGTCTGCGTCTCCTGGACAGTCGATCACCATCTCCTGCACTGGAACCAGCAGTGACGTTGGTGCTTATAACTCTGTCTCCTGGTACCAGCAGCACCCAGGCAAAGCCCCCAAACTCGTGATTTATGATGTCAGTGTTCGGCCCTCAGGGGTTTCTAATCGCTTCTCTGGCTCCAAGTCTGCCAACACGGCCTCCCTGACCATCTCTGGGCTCCGGGCTGAGGACGAGGCTGATTATTACTGCAGTTCATATACACGCAGCAGCACCCTCTATGTCTTCGGAACTGGGACCAAGGTCACCGTCCTA
201	IML3695	Pre-vax	ADI-67852	IGHV3-9*01	IGHD2-8*01	IGHJ4*02	IGKV3-15*01	IGKJ2*01	5.7	1.7	RBD	No	0.06049	0.2345	>1.0	>1.0	1.103	GCGAAAGATATTCAGTTCCGCGACCGGGATTGTACTAATGGTGTTTGCTCTGTCGGTGGGTTTGACTAC	AKDIQFRDRDCTNGVCSVGGFDY	CAGCAGTATAATAAGTGGCCCCCGCGGACG	QQYNKWPPRT	GAAGTGCAGCTGGTGGAGTCTGGGGGAGGCTTAGTACAGCCTGGCAGGTCCCTTACACTCTCCTGTGCAGCCTCTGGATTCACCTTTGAGGATTTTGCCATGCACTGGGTCCGGCAAGCTCCAGGGAAGGGCCTGGAGTGGGTCTCAGGTATTAGTTGGAATGGTGGCATCATAGGCTATGCGGACTCTGTGAAGGGCCGATGCACCATCTCCAGAGACAACGCCAAGAACTCCCTATATGTGCACATAAGAAGTCTGAGAGTTGAGGACACGGCCTTGTATTACTGTGCGAAAGATATTCAGTTCCGCGACCGGGATTGTACTAATGGTGTTTGCTCTGTCGGTGGGTTTGACTACTGGGGCCAAGGAACCCTGGTCACCGTCTCCTCA	GAAATAGTGATGACGCAGTCTCCAGCCACCCTGTCTGTGTCTCCAGGGGAAAGAGCCACCCTCTCCTGCAGGGCCAGTCAGAGTGTTAGTAGCAACTTAGCCTGGTACCAGCAAAAACCTGGCCAGGCTCCCAGGCTCCTCATCTATGGTGCATACACCAGGGCCACTGGTATCCCAGCCAGGTTCAGTGGCAGTGGGTCTGGGACAGAGTTCACTCTCACCATCAGCAGCCTGCAGTCTGAAGATTTTGCAGTTTATTACTGTCAGCAGTATAATAAGTGGCCCCCGCGGACGTTTGGCCAGGGGACCAAGCTGGAGATCAAA
202	IML3695	Pre-vax	ADI-67854	IGHV4-31*03	IGHD3-3*01	IGHJ4*02	IGKV3-20*01	IGKJ4*01	4.4	3.5	RBD	No				>1.0		GCTTCGGGTCTTTGGAGTGGTTTTTACTACTTTGACTAC	ASGLWSGFYYFDY	CAGCAGTACGGGAGTTTACCGCTCACT	QQYGSLPLT	CAGGTGCAGCTGCAGGAGTCGGGCCCAGGACTGGTGAAGCCTTCACAGACCCTGTCCCTCACCTGCACTGTCTCTGGTGACTCCATCAGCAGTGGTTCTTCCTACTGGAGCTGGATCCGCCAGCACCCAGGGGAGGGCCTGGAGTGGATTGGGTACATCTCTTACGGTGGGAGCTCCTACTACAACCCGTCCCTCAAGAGTCGAGTTACCATCTCAGTAGACACGTCTAAGAACCAGTTCTCCCTGAGGCTGACCTCTGTGACTGCCGCGGACACGGCCATATATTACTGTGCTTCGGGTCTTTGGAGTGGTTTTTACTACTTTGACTACTGGGGCCAAGGAACCCTGGTCACCGTCTCCTCA	GAAATTGTGTTGACGCAGTCTCCAGGCACCCTGTCTTTGTCTCCAGGGGAAAGAGCCACCCTCTCCTGCAGGGCCAGTCAGAGTGTTAGAAGCAGCTACTTAGCCTGGTACCAGCAGAAACCTGGCCAGGCTCCCAGGCTCCTCATCTATGGTGCATCCAACAGGGCCACTGGCATCCCAGACAGGTTCAGTGGCAGTGGGTCTGGGACAGACTTCATTTTTATCATCAGCAGACTGGAGCCTGAAGATTTTGCAGTGTATTACTGTCAGCAGTACGGGAGTTTACCGCTCACTTTCGGCGGAGGGACCAAGGTGGAGATCAAA
203	IML3695	Pre-vax	ADI-67855	IGHV3-33*01	IGHD3-22*01	IGHJ6*02	IGLV3-1*01	IGLJ2*01	4.1	6.7	NTD	No						TCGAGAGATGATAGTAGTGCTTATTCAATGGACGTC	SRDDSSAYSMDV	CAGGCGTGGGACAGCTTCACTAATGTTGTA	QAWDSFTNVV	CAGGTGCAGCTGGTGGAGTCTGGGGGAGGCGTGGTCCAGCCTGGGAAATCCCTGAGACTCTCCTGTGCAGCGTCTGGATTCAGCTTCAGCAGCTATGGCATGCACTGGGTCCGCCAGGCTCCAGGCAAGGGGCTGGAGTGGGTGGCAGTTATATGGTACGATGGAAGTAATACATTCTATGCAGACTCCGTGAAGGGCCGATTCACCATCTCCAGAGACAATTCCAAGAACACGCTGTATCTGCAAATGAATAGCCTGAGAGCCGACGACACGGCTGTTTACTACTGTTCGAGAGATGATAGTAGTGCTTATTCAATGGACGTCTGGGGGCAAGGGACCACGGTCACCGTCTCCTCA	TCCTATGAGCTGACTCAGCCACCCTCACTGTCCGTGTCCCCAGGACAGACATCCAGCATCACATGCTCTGGAGATAAGTTGGGGGATAAATATGTTTCCTGGTATCAACTAAAGCCAGGCCAGTCGCCCGTGTTGGTCATGTATCAAGATGACAAGCGGCCCTCAGGGATCCCTGAGCGATTCTCTGGCTCCAACTCTGGGAACACAGCCACTCTGACCATCAGTGGGACCCAGGCTTTGGATGAGGCTGACTATTACTGTCAGGCGTGGGACAGCTTCACTAATGTTGTATTCGGCGGAGGGACCAAGCTGACCGTCCTA
204	IML3695	Pre-vax	ADI-67857	IGHV4-39*01	IGHD3-3*01	IGHJ4*02	IGLV2-8*01	IGLJ1*01	2.4	1.7	RBD	No	0.002843	0.0027	0.0727	0.0159	0.01917	GCGGTGGGGGGGGTACGATTTCTGGAGTGGTTATTACAGTTTGACTAC	AVGGVRFLEWLLQFDY	AGCTCATATGCAGGCAGCAGCAATTTGGTA	SSYAGSSNLV	CAGCTGCAGCTGCAGGAGTCGGGCCCAGGACTGGTGAAGCCTTCGGAGACCCTGTCCCTCACCTGCTCTGTCTCTGGTGGCTCCATCAGCAGTAGTGATTACTACTGGGGCTGGATCCGCCAGCCCCCAGGGAAGGGGCTGGAGTGGATTGGGAGTTTCTATTATAGTGGGACCACCTACTACAACCCGTCCCTCAAGAGTCGAGTCACCATATCCGTAGACACGTCCAAGAACCACTTCTCCCTGAGGCTGAGCTCTGTGACCGCCGCAGACACGGCTGTGTATTACTGTGCGGTGGGGGGGGTACGATTTCTGGAGTGGTTATTACAGTTTGACTACTGGGGCCAAGGAACCCTGGTCACCGTCTCCTCA	CAGTCTGCCCTGACTCAGCCTCCCTCCGCGTCCGGGTCTCCTGGACAGTCAGTCACCATCTCCTGCACTGGAACCAGCAGTGACGTTGGTGCTTCTAATTATGTCTCCTGGTACCAACAGCACCCAGGCAAAGTCCCCAAACTCATGATTTATGAGGTCAGTAAGCGGCCCTCAGGGGTCCCTGATCGCTTCTCTGGCTCCAAGTCTGGCAACACGGCCTCCCTGACCGTCTCTGGGCTCCAGGCTGAGGATGAGGCTGATTATTACTGCAGCTCATATGCAGGCAGCAGCAATTTGGTATTCGGAACTGGGACCAAGGTCACCGTCCTA
205	IML3695	Pre-vax	ADI-67858	IGHV4-31*03	IGHD1-1*01	IGHJ6*02	IGKV3-20*01	IGKJ1*01	5	1.7	S2	No						GCGAGAGTTTCGGTTGCAACAACTGGCGGTATGGACGTC	ARVSVATTGGMDV	CAGCACTATGGTAGTTCACCCCTGTACATT	QHYGSSPLYI	CAGGTGCAGCTGCAGGAGTCGGGCCCAGGACTGGTGAAGCCTTCACAGACCCTGTCCCTCACCTGCACTGTCTCTGGTGTCTCCATCAGCAGTGGTGCTTACTACTGGACCTGGATCCGCCAGCACCCAGGGAAGGGCCTGGAATGGATTGGCTACATCTATTACAGTGGGAGCACCCTCTACAACCCCTCCCTCAAGAGTCGAATTACCATATCACTAGACACGTCTAAGAACCACTTCTCCCTGAAGGTGAACTCTATGACTGCCGCGGACACGGCCGTGTATTTCTGTGCGAGAGTTTCGGTTGCAACAACTGGCGGTATGGACGTCTGGGGGCAAGGGACCACGGTCACCGTCTCCTCA	GAAATTGTGTTGACGCAGTCTCCAGGCACCCTGTCTTTGTCTCCAGGGGAAAGAGCCACCCTCTCCTGCAGGGCCAGTCAGAGTGTTAGCAGCAACTTCTTAGCCTGGTACCAGCAGAAACCTGGCCAGGCTCCCAGGCTCCTCATCTATGGTGCATCCAGCAGGGCCACTGACATCCCAGACAGGTTCAGTGGCAGTGGGTCTGGGACAGACTTCACTCTCACCATCAGCAGACTGGAGCCTGAAGATTTTGCAGTGTATTACTGTCAGCACTATGGTAGTTCACCCCTGTACATTTTCGGCCAAGGGACCAAGGTGGAAATCAAA
206	IML3695	Pre-vax	ADI-67860	IGHV3-30-3*01	IGHD1-26*01	IGHJ4*02	IGKV3-15*01	IGKJ2*01	2.7	1.7	S2	No						GCGAGAGATGGTAGTGGGAGTTACTTTTATTACTTTGACTAC	ARDGSGSYFYYFDY	CAGCAGTATAATAACTGGCCTCAGACG	QQYNNWPQT	CAGGTGCAGCTGGTGGAGTCTGGGGGAGGCGTGGTCCAGCCTGGGAGGTCCCTGAGACTCTCCTGTGCAGCCTCTGGATTCACCTTCAGTAGTTATGCTATACACTGGGTCCGCCAGGCTCCAGGCAAGGGGCTGGAGTGGGTGGCAGTTACATCATATGATGGAAACAATAATTACTTCGCAGACTCCGTAAAGGGCCGATTCACCATCTCCAGAGACAATTCCAAGAACACGTTGTATCTGCAAATGAACAGCCTGAGAGCTGAGGACACGGCTGTGTATTACTGTGCGAGAGATGGTAGTGGGAGTTACTTTTATTACTTTGACTACTGGGGCCAAGGAACCCTGGTCACCGTCTCCTCA	GAAATAGTGATGACGCAGTCTCCAGCCACCCTGTCTGTGTCTCCAGGGGAAAGAGCCACCCTCTCCTGCAGGGCCAGTCAAAGTGTTAGCAGCAAGTTAGCCTGGTACCAGCAGAAACGTGGCCAGGCTCCCAGGCTCCTCATCTATGGTGCATCCACCAGGGCCACTGGTATCCCAGCCAGGTTCAGTGGCAGTGGGTCTGGGACAGAGTTCACTCTCACCATCAGCAGCCTGCAGTCTGAAGACTTTGCAGTTTATTATTGTCAGCAGTATAATAACTGGCCTCAGACGTTTGGCCAGGGGACCAAGCTGGAGATCAAA
207	IML3695	Pre-vax	ADI-67861	IGHV3-30-3*01	IGHD1-26*01	IGHJ4*02	IGKV4-1*01	IGKJ2*01	5.4	4.6	S2	No						GCGAGACCGTCGGGTGGGAGTTACTTTGGCCCCTTTGACTAC	ARPSGGSYFGPFDY	CAGGAATATTATACTAGTCCTTTCACT	QEYYTSPFT	CAGGTGCAGCTGGTGGAGTCTGGGGGAGGCGTGGTCCAGCCTGGGAGGTCCCTGAGACTCTCCTGTGCAGCCTCTGGATTCACCTTCAGTACCTATGCCCTTCACTGGGTCCGCCAGGCTCCAGGCAAGGGGCTGGAGTGGGTGGCAGTTGTATCATATGACGGAGACAATGCCTACTCCGCAGACTCCGTGAAGGGCCGATTCACCATCTCCAGAGACAATTCCAAGAGCACGCTGTATCTGCAAATGAACAGACTGACAACTGAGGACACGGCTGTGTATTACTGTGCGAGACCGTCGGGTGGGAGTTACTTTGGCCCCTTTGACTACTGGGGCCAAGGAACCCTGGTCACCGTCTCCTCA	GACATCGTGATGACCCAGTCTCCAGACTCCCTGGCTGTGTCTCTGGGCGAGAGGGCCACCATCAACTGCAAGTCCAGCCAGAGTCTTTTAAAGAGTTCCAACAATAAGAACTATTTAGCTTGGTACCAGCAGAAACCGGGACAGTCTCCTAAGCTCGTCATTTACTGGGCATCTACCCGGGAATCCGGGGTCCCTGACCGATTCACTGGCAGCGGGTCTGGGACAGATTTCACTCTCACCATCAGCAGCCTGCGGGCTGAAGATGTGGCAGTTTATTACTGTCAGGAATATTATACTAGTCCTTTCACTTTTGGCCAGGGGACCAAGCTGGAGATCAAA
208	IML3695	Pre-vax	ADI-67862	IGHV3-30*03	IGHD3-3*01	IGHJ5*02	IGKV1-12*01	IGKJ1*01	6.1	3.9	S2	No						GCGAGAGATCCCCTAGAGGGGACACTTTTCGGAGTTTCACTGGGATGGTGGTTCGACCCC	ARDPLEGTLFGVSLGWWFDP	CAACAGGCTAACACCTTCCCGTACACT	QQANTFPYT	CAGGTGCAGCTGGTGGAGTCTGGGGGAGGCGTGGTCCAGCCTGGGAGGTCCCTGAGACTCTCCTGTGCAGCCTCTGGATTCACCTTCACTAGCCATGGCATGCACTGGGTCCGCCAGACTCCAGGCAAGGGTCTGGAGTGGGTGGCAGTTATATCATATGATGGAATTAATAAGTTCTATGCAGACTCCCTGAAGGGCCGGTTCACCATCTCCAGAGACAGTTCCACGAACACGGTGTATCTGCAAATGAACAACCTGACACCTGACGACACGGCTATATATTACTGTGCGAGAGATCCCCTAGAGGGGACACTTTTCGGAGTTTCACTGGGATGGTGGTTCGACCCCTGGGGCCAGGGAACCCTGGTCACCGTCTCCTCA	GACATCCAGATGACCCAGTCTCCATCTTCCGTGTCTGCATCTGTAGGAGACAGAGTCACCATCACTTGTCGGGCGAGTCAGGGTATTAGCACCTGGGTAGCCTGGTATCAACAGAAACCAGGGAAAGCCCCTAACCTCCTGATCTATGCTGCATCTAGTTTGCAAACTGGGGTCCCATCAAGGTTCAGCGGCAGTGGATCTGGAAAAGATTTCACTCTCTCCATCAGCAGCCTGCAGCCTGAAGATTTTGCAACTTACTATTGTCAACAGGCTAACACCTTCCCGTACACTTTCGGCCAAGGGACCAAGGTGGAAATCAAA
209	IML3695	Pre-vax	ADI-67863	IGHV3-30-3*01	IGHD3-3*01	IGHJ5*02	IGKV4-1*01	IGKJ3*01	5.7	2	Undefined	No						GCGAGAGATTATTCCCCAGGTTACGATTTTTGGAGTGGAAGAACAACTCACAATTGGTTCGACCCC	ARDYSPGYDFWSGRTTHNWFDP	CAGCAACATTATAGTAGTTTCCCCACT	QQHYSSFPT	CAGGTGCAGCTGGTGGAGTCTGGGGGAGGCGTGGTCCAGCCTGGGAGGTCCCTGAGACTCTCCTGTGCAGCCTCTGGATTCACCTTCAATAACTATGCTATGCACTGGGTCCGCCAGGCTCCAGGCCAGGGGCTGGAGTGGGTGACAGGTGTGTCATATAATGGACTCAATAAATACTACACAGACTCCGTGAAGGGCCGATTCACCATCTCCAGAGACGATTCCAACAACACACTGTATCTGCAAATGAGCAGCCTGAGAGCTGAGGATACGGCTGTATATTACTGTGCGAGAGATTATTCCCCAGGTTACGATTTTTGGAGTGGAAGAACAACTCACAATTGGTTCGACCCCTGGGGCCAGGGAACCCTGGTCACCGTCTCCTCA	GACATCGTGATGACCCAGTCTCCAGACTCCCTGTCTGTGTCTCTGGGCGAGAGGGCCACCATCAACTGCAAGTCCAGCCAGAGTCTTTTATACAGCTCCAACAATAAGAACTACTTAGCTTGGTACCAGCAGAAAGCAGGACAGCCTCCTAAGCTGCTCATTTACTGGGCATCTACCCGGGAATCCGGGGTCCCTGACCGATTCAGTGGCAGCGGGTCTGGGACAGATTTCACCCTCACCATCAGCAGCCTGCAGGCTGAAGATGTGGCAATTTATTACTGTCAGCAACATTATAGTAGTTTCCCCACTTTCGGCCCTGGGACCAAAGTGGATATCAAA
210	IML3695	Pre-vax	ADI-67864	IGHV3-30-3*01	IGHD3-10*01	IGHJ1*01	IGKV1-39*01	IGKJ1*01	0.3	0	RBD	No		0.9572		>1.0		GCGAGTCTTATTACTATGGTTCGGGGAGTTCCTTCAAAC	ASLITMVRGVPSN	CAACAGAGTTACAGTACCCCTTTGACT	QQSYSTPLT	CAGGTGCAGCTGGTGGAGTCTGGGGGAGGCGTGGTCCAGCCTGGGAGGTCCCTGAGACTCTCCTGTGCAGCCTCTGGATTCACCTTCAGTAGCTATGCTATGCACTGGGTCTGCCAGGCTCCAGGCAAGGGGCTGGAGTGGGTGGCAGTTATATCATATGATGGAAGCAATAAATACTACGCAGACTCCGTGAAGGGCCGATTCACCATCTCCAGAGACAATTCCAAGAACACGCTGTATCTGCAAATGAACAGCCTGAGAGCTGAGGACACGGCTGTGTATTACTGTGCGAGTCTTATTACTATGGTTCGGGGAGTTCCTTCAAACTGGGGCCAGGGCACCCTGGTCACCGTCTCCTCA	GACATCCAGATGACCCAGTCTCCATCCTCCCTGTCTGCATCTGTAGGAGACAGAGTCACCATCACTTGCCGGGCAAGTCAGAGCATTAGCAGCTATTTAAATTGGTATCAGCAGAAACCAGGGAAAGCCCCTAAGCTCCTGATCTATGCTGCATCCAGTTTGCAAAGTGGGGTCCCATCAAGGTTCAGTGGCAGTGGATCTGGGACAGATTTCACTCTCACCATCAGCAGTCTGCAACCTGAAGATTTTGCAACTTACTACTGTCAACAGAGTTACAGTACCCCTTTGACTTTCGGCCAAGGGACCAAGGTGGAAATCAAA
211	IML3695	Pre-vax	ADI-67865	IGHV3-30*18	IGHD4-4*01	IGHJ4*02	IGLV2-11*01	IGLJ2*01	3.1	0.7	S2	No						GCGAACGCGGGGGGAGGTAACTACTACTACTTTGACTAC	ANAGGGNYYYFDY			CAGGTGCAGCTGGTGGAGTCTGGGGGAGGCGTGGTCCAGCCTGGCAGGTCCCTGAGACTCTCCTGTGCTGCCTCTGGATTCACCTTCAGTAGCAATGGCATGCACTGGGTCCGCCAGGCTCCAGGCAAGGGGCTGGAGTGGGTGGCACTTATATCATATGATGGAGATAATAAATACTATGCAGACTCCGTGAAGGGCCGATTCACCATCTCCAGAGACAATTCCAAGAACACGCTGTATCTGCAAATGAACAACCTGAGAGTTGAGGACACGGCTGTATATTACTGTGCGAACGCGGGGGGAGGTAACTACTACTACTTTGACTACTGGGGCCAAGGAACCCTGGTCACCGTCTCCTCA	CAGTCTGCCCTGACTCAGCCTCGCTCAGTGTCCGGGTCTCCTGGACAGTCAGTCACCATCTCCTGCACTGGAACCAGCAGTGATGTTGGTGGTTATAACTATGTCTCCTGGTACCAACAGCACCCAGGCAAAGCCCCCAAACTCATGATTTATGATGTCACTAAGCGGCCCTCAGGGGTCCCTGATCGCTTCTCTGGCTCCAAGTCTGGCAACACGGCCTCCCTGACCATCTCTGGGCTCCAGGCTGAGGATGAGGCTGATTATTACTGCTACTCGCTATGGGTCAGCGGCGGAGGGACCAAGCTGACCGTCCTA
212	IML3695	Pre-vax	ADI-67868	IGHV1-3*01	IGHD3-10*01	IGHJ4*02	IGKV3-20*01	IGKJ1*01	3.4	2.1	S2	No						GCGACAGCAATTTTGCCGCTCACGGGGAATGACTTC	ATAILPLTGNDF	CAGCAGTATGGTAGCACCCCCAGGACG	QQYGSTPRT	CAGGTCCAGCTTGTGCAGTCTGGGGCTGAGGTGAAGAAGCCTGGGGCCTCAGTGAAGGTTTCCTGCAAGCCTTTTGGATACACCTTCACGAGCTTTGCTCTACATTGGGTGCGCCAGGCCCCCGGACAAAGACTTGAGTGGATGGGATGGATCAACGCTGCCAATGGTAACACAAAATATTCACAGAAGTTCCAGGGCAGAGTCACCATTACCAGGGACACATCCGCGAGCACAGCCTACATGGAGCTGAGCAGCCTCAGATCTGAAGACACGGCTGTGTATTACTGTGCGACAGCAATTTTGCCGCTCACGGGGAATGACTTCTGGGGCCAAGGAACCCTGGTCACCGTCTCCTCA	GAAATTGTGTTGACGCAGTCTCCAGGCACCCTGTCTTTGTCTCCAGGGGAAAGAGCCACCCTCTCCTGCAGGGCCAGTCAGAGTGTTAGTACCAACTACTTAGCCTGGTACCAGCAGAAACCTGGCCAGGCTCCCAGGCTCCTCACCTATGGTGCATCCAGCAGGGCCACTGGCATCCCAGACAGGTTCAGTGGCAGTGGGTCTGGGACAGACTTCACTCTCACCATCAGCAGACTGGAGCCTGAAGATTTTGCAGTGTATTACTGTCAGCAGTATGGTAGCACCCCCAGGACGTTCGGCCAAGGGACCAAGGTGGAAATCAAA
213	IML3695	Pre-vax	ADI-67869	IGHV3-30*03	IGHD4-17*01	IGHJ4*02	IGKV1-39*01	IGKJ5*01	3.1	2.8	RBD	No		>1.0	>1.0	>1.0		GCGAGACCCTTCTACGATGACCTCTCGAGTGGGACATTTGACTAC	ARPFYDDLSSGTFDY	CAACAGACTTACAGTACCCTCTCGATCACC	QQTYSTLSIT	CAGGTGCAGCTGGTGGAGTCTGGGGGAGGCGTGGTCCAGCCTGGGAGGTCCCTGAGACTCTCCTGTGCAGCCTCTGGATTCACCTTCAGTACCTATGACATGCACTGGGTCCGCCAGACTCCAGGCAAGGGGCTGGAGTGGCTGGCAATTATATCATATGATGGAAGTACTAAATTCTATGCAGACTCCGTGAAGGGCCGATTCACCATCTCCAGAGACAATTCCAAGAACACGCTGTCTCTGCAAATGAGCAGCCTGAGAGCTGAGGACACGGCTGTGTATTACTGTGCGAGACCCTTCTACGATGACCTCTCGAGTGGGACATTTGACTACTGGGGCCAAGGAACCCTGGTCACCGTCTCCTCA	GACATCCAGATGACCCAGTCTCCATCCTCCCTGTCTGCATCTGTAGGAGACAGAGTCACCATCACTTGCCGGGCAAGTCAGAGCATTGGCAGATATTTAAATTGGTATCAGCAGAAACCAGGGAAAGCGCCTAAGCTCCTGATCTATACTGCATCCAGTTTGCAAAGTGGGGTCCCATCAAGGTTCAGTGGCAGTGGATCTGGGACAGATTTCACTCTCACCATCAGCGCTCTGCAACCTGAAGATTTTGCAACTTATTACTGTCAACAGACTTACAGTACCCTCTCGATCACCTTCGGCCAAGGGACACGACTGGAGATTAAA
214	IML3695	Pre-vax	ADI-67871	IGHV3-30-3*01	IGHD3-3*01	IGHJ4*02	IGKV1-33*01	IGKJ4*01	2.7	1.4	NTD	No						GCGACCCCCCGTTACGATTTTCGGATTGGTTATTTTACCGCTTCCTTTGACTAC	ATPRYDFRIGYFTASFDY	CAACAGTATGATAATCTCCCGCTCACT	QQYDNLPLT	CAGGTGCAGCTGGTGGAGTCTGGGGGAGGCGTGGTCCAGCCTGGCAGGTCCCTGAGACTCTCCTGTGCAGCCTCTGGATTCACCTTCAGTAGCTATGCTATACACTGGGTCCGCCAGGCTCCAGGCAAGGGGCTGGAGTGGGTGGCCGTTATATCATATGATGGAAGCAATAAATATTACGCAGACTCCGTGAAGGGCCGATTCACCATCTCCAGAGACAATTCCAAGAACACACTATATCTGCAAATGAACAGCCTGAGAGCTGAGGACGCGGCTCTGTATTACTGTGCGACCCCCCGTTACGATTTTCGGATTGGTTATTTTACCGCTTCCTTTGACTACTGGGGCCAAGGAACCCTGGTCACCGTCTCCTCA	GACATCCAGATGACCCAGTCTCCATCCTCCCTGTCTGCATCTGTAGGAGACAGAGTCACCGTCACTTGCCATGCGAGTCAGGACATTAGCAACTATTTAAATTGGTATCAGCAGAAACCAGGGAAAGCCCCTAACCTCCTGATCTACGATGCATCCAATTTGGAAACAGGGGTCCCATCAAGGTTCAGTGGAAGTGGATCTGGGACAGATTTTACTTTCTCCATCAGCAGCCTGCAGCCTGAAGATATTGCAACATATTACTGTCAACAGTATGATAATCTCCCGCTCACTTTCGGCGGAGGGACCAAGGTGGAGATCAAA
215	IML3695	Pre-vax	ADI-67872	IGHV3-23*01	IGHD3-10*01	IGHJ6*02	IGKV2-28*01	IGKJ5*01	5.5	1.3	RBD	No	0.8073	0.8365		>1.0	7.119	GCGAGCCCTTCTGCGGCGGCCGAGTCGGGCTACTTTTACGATATGGACGTC	ASPSAAAESGYFYDMDV	ATGCAAGCTCTACAAACTCCTACC	MQALQTPT	GAGGTGCAGCTGTTGGAGTCTGGGGGAGGGTTGCTACAGCCTGGGGGGTCCCTGAGACTCTCCTGTGTAGCCTCTGCATTCACCTTTAACAACTATGCCATGACCTGGGTCCGCCAGGCTCCAGGGAAGGGGCTGGAGTGGGTCTCAGGAATTAGTGGTAGTGGTGATCGGACATATTACGCAGACTCCGTGAAGGGCCGGTTCACCATCTCCAGAGACAATTCGAAGAATACTCTGTATCTGCAAATGAACAGCCTGAGAGCCGAGGACACGGCCGTATATTACTGTGCGAGCCCTTCTGCGGCGGCCGAGTCGGGCTACTTTTACGATATGGACGTCTGGGGGCAAGGGACCACGGTCACCGTCTCCTCA	GATATTGTGATGACTCAGTCTCCACTCTCCCTGCCCGTCACCCCTGGAGAGCCGGCCTCCATCTCCTGCAAGTCTAGTCGGAGCCTCCTGCACAGTAATGGATACAACTATTTGGATTGGTACCTGCAGAAGCCAGGGCAGTCTCCACAGGTCCTGATCTATTTGGGTTCTAATCGGGCCTCCGGGGTCCCTGACAGGTTCAGTGGCAGTGGATCAGGCACAGATTTTACACTGAAAATCAGCAGAGTGGAGGCTGAGGATGTTGGGGTTTATTACTGCATGCAAGCTCTACAAACTCCTACCTTCGGCCAAGGGACACGACTGGAGATTAAA
216	IML3695	Pre-vax	ADI-67877	IGHV3-30*18	IGHD6-19*01	IGHJ4*02	IGKV3-20*01	IGKJ1*01	4.7	3.8	RBD	No						GCGAAAGATGGAGGCTGGTACCAACAGATATATTATTACTTTGACTAC	AKDGGWYQQIYYYFDY	CAGCAGTATGGTAACTCACAGACG	QQYGNSQT	CAGGTGCAGCTGGTGGAGTCTGGGGGAGGCGTGGTCCAGCCTGGGAGGTCCCTGAGACTCTCCTGTGCAATTTCTGGATTCACCTTCAGTCACTATGCCATGCACTGGGTCCGCCAGGCTCCAGGCAAGGGGCTGGAGTGGGTGGCAATTATATCATATGATGGAAGTGATGCATACTATGCAGACTCCGTGAAGGGCCGATTCACCATCTCCAGAGACAATTCCAAGAACACGCTGTATCTGCAAATGAACAGCCTGAGAACTGACGACACGGCTATATATTACTGTGCGAAAGATGGAGGCTGGTACCAACAGATATATTATTACTTTGACTACTGGGGCCAAGGAACCCTGGTCACCGTCTCCTCA	GAAATTGTGTTGACGCAGTCTCCAGGCACCCTGTCTTTGTCTCCAGGGGAAAGAGCCACCCTCTCCTGCAGGGCCAGGCAGAGTGTCAGCGGCAGCCACTCAGCCTGGTACCAACAGAAACCTGGCCAGGCTCCCAGGCTCCTCATCTATGATACATCCAGCAGGGCCAATGGCATCCCAGACAGGTTCAGTGGCAGTGGGTCCGGGACAGACTTCACTCTCACCATCAGCAGACTGGAGCCTGAAGATTTTGCAGTGTATTACTGTCAGCAGTATGGTAACTCACAGACGTTCGGCCAAGGGACCAAGGTGGAAATCAAA
217	IML3695	Pre-vax	ADI-67878	IGHV1-45*02	IGHD3-3*01	IGHJ6*02	IGLV2-14*03	IGLJ1*01	6.6	2.4	RBD	Yes						GCCGTAAGAGGCGCGGGATTTACAGGGGCAGACCACTACGCTATGGACGTC	AVRGAGFTGADHYAMDV	AGCTCATATACAAGCAGTAGCACTCAGGTC	SSYTSSSTQV	CAGATGCAGCTGGTGCAGTCTGGGGCTGAGGTGAAGAAGACTGGGTCCTCAGTGAAAATTTCCTGCAGGGCTTCCGGACACAGCTTCACCTACCGCTACCTCCACTGGGTGCGACAGGCCCCCGGACAAGCGCTTGAGTGGATGGGATGGATCACAAGTTGGAATGGGAACACCAAGTACGCACAGAAATTCCAGGACAGAGTCACCATGACCGGGGACAGGTCAAAGAGTTCAGCCTACATGGAGCTGAGCAGCCTGAGATCTGAGGACACAGCCGTGTATTACTGTGCCGTAAGAGGCGCGGGATTTACAGGGGCAGACCACTACGCTATGGACGTCTGGGGGCAAGGGACCACGGTCACCGTCTCCTCA	CAGTCTGCCCTGACTCAGCCTGCCTCCGTGTCTGGGTCTCCTGGACAGTCGCTCACCATCTCCTGCACTGGAACCAGCAGTGACGTTGGTTTTTATAACTATGTCTCCTGGTACCAACAACACCCAGACAAAGCCCCCAAACTCATGATTTCTGATGTCAGTAATCGGCCCTCAGGGGTTTCTGATCGCTTCTCTGGCTCCAAGTCTGGCAACACGGCCTCCCTGACCATCTCTGGGCTCCAGGCTGAGGACGAGGCTGATTATTACTGCAGCTCATATACAAGCAGTAGCACTCAGGTCTTCGGAACTGGGACCAAGGTCACCGTCCTA
218	IML3695	Pre-vax	ADI-67879	IGHV3-30-3*01	IGHD3-3*01	IGHJ6*02	IGKV3-20*01	IGKJ3*01	1.4	1	NTD	No						GCGAGAGACCAGGAGTATTACGATTTTTGGAGTGGTTACCTCGCTAGCCCAAGTAATTATTACTCCTACGCTATGGACGTC	ARDQEYYDFWSGYLASPSNYYSYAMDV	CAGCAGTATGGTAGCTCACCTTTCACT	QQYGSSPFT	CAGGTGCAGCTGGTGGAGTCTGGGGGAGGCGTGGTCCAGCCTGGGAGGTCCCTGAGACTCTCCTGTGCAGCCTCTGGATTCACCTTCAGTAACTATGCTATGCACTGGGTCCGCCAGGCTCCAGGCAAGGGGCTGGAGTGGGTGGCAGTTATATCATATGATGGAAGCAAAAAATACTACGCAGACTCCGTGAAGGGCCGATTCACCATCTCCAGAGACATTTCCAAGAACACGTTGTATCTGCAAATGAACAGCCTGAGAGCTGAGGACACGGCTGTGTATTACTGTGCGAGAGACCAGGAGTATTACGATTTTTGGAGTGGTTACCTCGCTAGCCCAAGTAATTATTACTCCTACGCTATGGACGTCTGGGGGCAAGGGACCACGGTCACCGTCTCC…	GAAATTGTGTTGACGCAGTCTCCAGGCACCCTGTCTTTGTCTCCAGGGGAAAGAGCCACCCTCTCCTGCAGGGCCAGTCAGAGTGTTAGCAGCAGCTACTTAGCCTGGTACCAGCAGAAGCCTGGCCAGGCTCCCAGGCTCCTCATCTATGGTACATCCAGCAGGGCCACTGGCATCCCAGACAGGTTCAGTGGCAGTGGGTCTGGGACAGACTTCACTCTCACCATCAGCAGACTGGAGCCTGAAGATTTTGCAGTGTTTTACTGTCAGCAGTATGGTAGCTCACCTTTCACTTTCGGCCCTGGGACCAAAGTGGATATCAAA
219	IML3695	Pre-vax	ADI-67880	IGHV3-30*18	IGHD3-22*01	IGHJ6*02	IGLV2-14*03	IGLJ1*01	2.4	3.7	Undefined	No		>1.0	>1.0	>1.0		GCGAAAGAATTCTATGATAGTAGTGGTTCTTTTAACACTTACTTCTACTACTACTACGGGATGGACGTC	AKEFYDSSGSFNTYFYYYYGMDV	AGCTCATATACAACCAGCCCCACTCTCGTTTATGTC	SSYTTSPTLVYV	CAGGTGCAGCTGGTGGAGTCTGGGGGAGGCGTGGTCCAGCCTGGGAGGTCCCTGAGACTCTCCTGTGCAACCTCTGGATTCACCTTCAGTAGTTATGGCATGCACTGGGTCCGCCAGGCTCCAGGCAAGGGGCTGGAGTGGGTGTCAGTTATATCATATGATGGAAGTAGTAAATACTATGCAGACTCCGTGAAGGGCCGATTCACCATCTCCAGAGACAATTCCAAAAGCACGCTGTATCTGCAAATGAACAGCCTGAGAGCTGAGGACACGGCTGTGTATTATTGTGCGAAAGAATTCTATGATAGTAGTGGTTCTTTTAACACTTACTTCTACTACTACTACGGGATGGACGTCTGGGGGCAAGGGACCACGGTCACCGTCTCCTCA	CAGTCTGCCCTGACTCAGCCTGCCTCCGTGTCTGGGTCTCCTGGACAGTCGATCACCATTTCATGCACTGGAACCAGCAGTGACGTTGGTCTTTATAACTATGTCTCCTGGTACCAACAACACCCAGGCAAAGCCCCCAAAGTCATGATATATGATGTCAGTAATCGGCCCTCAGGGGTTTCTAATCGCTTCTCTGGCTCCAAGGCTGGCAACACGGCCTCCCTGACCATCTCTGGGCTCCAGACTGAGGACGAGGCTGATTATTACTGCAGCTCATATACAACCAGCCCCACTCTCGTTTATGTCTTCGGAACTGGGACCAAGGTCACCGTCCTA
220	IML3695	Pre-vax	ADI-67883	IGHV4-31*03	IGHD3-22*01	IGHJ4*02	IGKV3-11*01	IGKJ1*01	3	1.8	S2	No						GCGAGTGGCCATTATTCTTACTATGATAATAGTACTTACCTCCCCTAC	ASGHYSYYDNSTYLPY	CAGCAGCGTAGCAACTGGCCGTACACT	QQRSNWPYT	CAGGTGCAGCTGCAGGAGTCGGGCCCAGGACTGGTGAAGCCTTCACAGACCCTGTCCCTCACCTGCACTGTCTCTGGTGGCTCCATCAGCAGTGGTGGTTACTACTGGAGCTGGATCCGCCAGCGCCCAGGGAAGGGCCTGGAGTGGATTGGGTTCATCTATTACAGTGGCAACACCTACTACACCCCGTCCCTCGAGAGTCGACTTACCATGTCACTAGACACGTCTAAGAACCAGTTCTCCCTGAAGCTGAGCTCTGTGACTGCCGCGGACACGGCCGTGTATTACTGTGCGAGTGGCCATTATTCTTACTATGATAATAGTACTTACCTCCCCTACTGGGGCCAAGGAACCCTGGTCACCGTCTCCTCA	GAAATTGTGTTGACACAGTCTCCAGCCACCCTGTCTTTGTCTCTAGGGGAAAGAGCCACCCTCTCCTGCAGGGCCAGTCAGAGTATTAGCAGCTACTTAGCCTGGTACCAACAGAAACCTGGCCAGGCTCCCAGGCTCCTCATATATGATGCATCGAACAGGGCCACTGGCGTCCCAGCCAGGTTCAGTGGCAGTGGGTCTGGGACAGACTTCACTCTCACCATCAGCAGCCTAGAGCCTGAAGATTTTGCAGTTTATTACTGTCAGCAGCGTAGCAACTGGCCGTACACTTTCGGCCAAGGGACCAAGGTGGAAATCAAA
221	IML3695	Pre-vax	ADI-67886	IGHV3-33*01	IGHD2-15*01	IGHJ4*02	IGKV1-33*01	IGKJ4*01	2.7	1.4	RBD	No		>1.0	>1.0	>1.0		GCGAAATCCCAGGGTCCATATTGTGGTGGTGGTTCCTGCTACGGGTCGGCATTTGACTAC	AKSQGPYCGGGSCYGSAFDY	CAACAGTATGATAATCTCCCGCTCACT	QQYDNLPLT	CAGGTGCAGCTGGTGGAGTCTGGGGGAGGCGTGGTCCAGCCTGGGAGGTCCCTGAGACTCTCCTGTGCAGCGTCTGGATTCACCTTCAGTCACTATGGCATGCACTGGGTCCGCCAGGCTCCAGGCAAGGGGCTGGAGTGGGTGACAGTTATATGGTTTGATGGAAGTAATAAATACTATGCAGACTCCGTGAAGGGCCGATTCACCATCTCCAGAGACAATTCCAAGAGCACGCTCTATCTCCAAATGAACAGCCTGAGAGTCGAGGACACGGCTGTGTATTACTGTGCGAAATCCCAGGGTCCATATTGTGGTGGTGGTTCCTGCTACGGGTCGGCATTTGACTACTGGGGCCAAGGAACCCTGGTCACCGTCTCCTCA	GACATCCAGATGACCCAGTCTCCATCCTCCCTGTCTGCATCTGTAGGAGACAGAGTCACCATCACTTGCCAGGCGAGTCAGGACATTAACAACCATTTAAATTGGTATCAGCAGAAAGCAGGGAAAGCCCCTAAGTTCCTGATCTACGATGCATCCAATTTGGAAACAGGGGTCCCATCAAGGTTCAGTGGAAGTGGATCTGGGACAGATTTTACTTTCACCATCAGCAGCCTGCAGCCTGAAGATATTGCAACATATTACTGTCAACAGTATGATAATCTCCCGCTCACTTTCGGCGGAGGGACCAAGGTGGAGATCAAA
222	IML3695	Pre-vax	ADI-67889	IGHV1-46*01	IGHD2-2*01	IGHJ4*02	IGKV3-15*01	IGKJ2*01	4.4	2.8	RBD	No						GCGAGAGGTGTACTAGTACCAGCTGCTAGGGGCCCTTTTGACTAC	ARGVLVPAARGPFDY	CAGCAGTATAATGACTGGCCTCGGTACACT	QQYNDWPRYT	CAGGTGCAGCTGGTGCAGTCTGGGGCTGAGGTGAAGAAGCCTGGGGCCTCAGTGAAGGTTTCCTGCAAGGCACCTGGATACACCTTCAGCAACTTCTATATACACTGGGTGCGACAGGCCCCTGGACAGGGGCTTGACTGGATGGGAATAATCAACCCTAGTGGTGGTAGCACAACCTACGCACAGAAGTTCCAGGGCAGAGTCAGCATGACCAGGGACACGTCCACGAACACAGTGTACATGGAACTGAGCGGCCTGAGATCTGAGGACACGGCCGTGTATTACTGTGCGAGAGGTGTACTAGTACCAGCTGCTAGGGGCCCTTTTGACTACTGGGGCCAAGGAACCCTGGTCACCGTCTCCTCA	GAAATAGTGATGACGCAGTCTCCAGTCACCCTGTCTGTGTCTCCAGGGGAAAGAGCCACCCTCTCCTGCAGGGCCAGTCAGAGTGTTAGCAACAACTTAGCCTGGTACCAGCAGAAACCTGGCCAGGCTCCCAGGCTCCTCATCTATGGTGCATCCACCAGGGCCAGTGGTTTCCCAGCCAGGTTCAGTGGCAGTGGGTCTGGGACAGACTTCACTCTCATCATCAGCAGCCTGCAGTCTGAAGATTTTGCAATTTATTACTGTCAGCAGTATAATGACTGGCCTCGGTACACTTTTGGCCAGGGGACCAAGCTGGAGATCAAA
223	IML3695	Pre-vax	ADI-67890	IGHV4-4*07	IGHD5-12*01	IGHJ6*02	IGLV3-25*03	IGLJ2*01	4.5	3.1	Undefined	No		>1.0				GCGAGAGGTGGGGGTTCACATAGGGTCTACGACCCCTACTACGGGATGGACGTC	ARGGGSHRVYDPYYGMDV	CAATCAGAAGACAGCAGTGGTACTTATGTGGTA	QSEDSSGTYVV	CAGGTGCAGCTGCAGGAGTCGGGCCCAGGACTGGTGAAGCCTTCGGAGACCCTGTCCCTCACCTGCACTGTCTCTGGTGGCTCCATCACTAGTCACTACTGGAGCTGGATTCGACAGCCCGCCGGGAAGGGACTGGAGTGGATTGGGCGTCTGTACACCAGTGGGACCACCAATTACAACCCCTCCCTCAAGAGTCGAATCACCATGTCAGTAGACACGTCCAAGAACCAGTTGTCCCTGAAGCTGAGCTCTGTGACGGCCGCGGACACGGCCGTGTATTATTGTGCGAGAGGTGGGGGTTCACATAGGGTCTACGACCCCTACTACGGGATGGACGTCTGGGGGCAAGGGACCACGGTCACCGTCTCCTCA	TCCTATGAGCTGACACAGCCACCCTCGGTGTCAGTGTCCCCAGGACAGACGGCCAGGATCACCTGCTCTGGAGATGCATTGCCTAAGCAATATGCTTATTGGTTCCAGCAGAAGCCAGGCCAGGCCCCTGTGTTGGTGATGTATAAAGACATTGGGAGGCCCTCAGGGATCCCTGAGCGATTCTCTGGCTCCAGCTCAGGGACAACAGTCACGTTGACCATCAGTGGGGTCCAGGCAGAGGACGAGGCTGACTATTACTGTCAATCAGAAGACAGCAGTGGTACTTATGTGGTATTCGGCGGAGGGACCAAGCTGACCGTCCTA
224	IML3695	Pre-vax	ADI-67893	IGHV4-31*03	IGHD2-15*01	IGHJ5*02	IGKV3-11*01	IGKJ4*01	2.3	0.7	RBD	No		>1.0	>1.0	>1.0		GCGAGAGAGGGTAGCTTCAGCTGGTTGGACTTC	AREGSFSWLDF	CAGCAGCGTTACAACTGGCCTCCGCTCACT	QQRYNWPPLT	CAGGTGCAGCTGCAGGAGTCGGGCCCAGGACTGGTGAAGACTTCCCAGACCCTGTCCCTCGCCTGCACTGTCTCTGGTGGCTCCATCAGCAGTGGTGGTTACTACTGGAGCTGGATCCGCCAGCACCCAGGGAAGGGCCTGGAGTGGATTGGGTACATCTATTACAGTGGGAACACCTACTACAACCCGTCCCTCAAGAGTCGAGTTACCATATCACTAGACACGTCTAAGAACCAGTTCTCCCTGAAGCTGAGCTCTGTGACTGCCGCGGACACGGCCGTGTATTTATGTGCGAGAGAGGGTAGCTTCAGCTGGTTGGACTTCTGGGGCCAAGGAACCCTGGTCACCGTCTCCTCA	GAAATTGTGTTGACACAGTCTCCAGCCACCCTGTCTTTGTCTCCAGGGGAAAGAGCCACCCTCTCCTGCAGGGCCAGTCAGAGTGTTAGCAGCTACTTAGCCTGGTACCAACAGAAACCTGGCCAGGCTCCCAGGCTCCTCATCTATGATGCATCCAACAGGGCCACTGGCATCCCAGCCAGGTTCAGTGGCAGTGGGTCTGGGACAGACTTCACTCTCACCATCAGCAGCCTAGAGCCTGAAGATTTTGCAGTTTATTACTGTCAGCAGCGTTACAACTGGCCTCCGCTCACTTTCGGCGGAGGGACCAAGGTGGAGATCAAA
225	IML3695	Pre-vax	ADI-67894	IGHV4-59*01	IGHD6-19*01	IGHJ6*02	IGLV2-8*01	IGLJ1*01	4.1	0.3	S2	No						GCGAGGGGTCCCGGCTGGTACCCCAACTACCACTACTACGCTATGGACGTC	ARGPGWYPNYHYYAMDV	AGCTCATATGCAGGCAGCAACAATTTGGTA	SSYAGSNNLV	CAGGTGCAGCTGCAGGAGTCGGGCCCAGGACTGGTGAAGCCTTCGGAGACTCTGTCCCTCACCTGCACTGTCTCTGGTGGCTCCATCAGTACTTATTACTGGAGTTGGATCCGGCAGCCCCCAGGGAAGGGATTGGAGTGCATTGGGTATATCCATTACAGTGGGAGCACCAACTACAACCCCTCCCTCAAGGGTCGAGTCACCATATCACTAGACACGTCCAAGAATCAGTTCTCCCTGAAGTTGAGTTCTGTGACCGCTGCGGACACGGCCGTGTATTACTGTGCGAGGGGTCCCGGCTGGTACCCCAACTACCACTACTACGCTATGGACGTCTGGGGGCAAGGGACCACGGTCACCGTCTCCTCA	CAGTCTGCCCTGACTCAGCCTCCCTCCGCGTCCGGGTCTCCTGGACAGTCAGTCACCATCTCCTGCACTGGAACCAGCAGTGACGTTGGTGGTTATAACTATGTCTCCTGGTACCAACAGCACCCAGGCAAAGCCCCCAAACTCATGATTTCTGAGGTCAGTAAGCGGCCCTCAGGGGTCCCTGATCGCTTCTCTGGCTCCAAGTCTGGCAACACGGCCTCCCTGACCGTCTCTGGGCTCCAGGCTGAGGATGAGGCTGATTATTACTGCAGCTCATATGCAGGCAGCAACAATTTGGTATTCGGAACTGGGACCAAGGTCACCGTCCTA
226	IML3695	Pre-vax	ADI-67895	IGHV3-15*01	IGHD2-2*01	IGHJ6*02	IGKV2-28*01	IGKJ5*01	4	1.3	Undefined	No						ACCACAGTCGAGAGGTCATACTGCAGTACTACCAGGTGCTATCCCAATTACTATAATTACTACGGAATGGACGTC	TTVERSYCSTTRCYPNYYNYYGMDV	ATGCAAGCTCTACAAACTCCGATCACC	MQALQTPIT	GAGGTGCAGCTGGTGGAGTCTGGGGGAGGCTTGGCAAAGCCTGGGGGGTCCCTTAGACTCTCCTGTGGAGCCACTGGACTCACTTTCAGTAGGGCCTGGATGAGCTGGGTCCGCCAGGCTCCAGGGAAGGGGCTGGAGTGGGTTGGTCGTATTAAAAGCAAAACTGATGGTGAGACAACAGACTACGCTGCACCCGTGAAAGGCAGATTCACCATCTCAAGAGATGACTCAGAAAACACGTTGTATCTACAAATGAACAGCCTGAAAACCGAGGACACAGCCGTGTATTACTGTACCACAGTCGAGAGGTCATACTGCAGTACTACCAGGTGCTATCCCAATTACTATAATTACTACGGAATGGACGTCTGGGGGCAAGGGACCACGGTCACCGTCTCC…	GATATTGTGATGACTCAGTCTCCACTCTCCCTGCCCGTCACCCCTGGAGAGCCGGCCTCCATCTCCTGCAGGTCTAGTCAGAGCCTCCTGCATAGTAATGGATACAATTATTTGGATTGGTACCTACAGAAGCCAGGGCAGTCTCCACAGGTCCTGATCTATTTGGGCTCTAATCGGGCCTCCGGGGTCCCTGACAGGTTCAGTGGCAGTGGATCAGGCACAGATTTTACACTGAAAATCAGCAGAGTGGAGGCTGAGGATGTTGGGGTTTATTACTGCATGCAAGCTCTACAAACTCCGATCACCTTCGGCCAAGGGACACGACTGGAGATTAAA
227	IML3695	Pre-vax	ADI-67896	IGHV3-30-3*01	IGHD3-10*01	IGHJ6*02	IGKV1-39*01	IGKJ1*01	4.4	1.8	S2	No						GCGAGATCGGTCCGGGGCAGTTACTACTACGGTATGGACGTC	ARSVRGSYYYGMDV	CAACAGAGTTACAGTACCCCGTACACT	QQSYSTPYT	CAGGTGCAGCTGGTGGAGTCTGGGGGAGGGGTGGTCCAGCCTGGGAGGTCCCTGAGACTCTCCTGTGCAGCCTCTGGATTCACCTTCAGTACCTATGCTATGCACTGGGTCCGCCAGGCTCCAGGCAAGGGGCTGGAGTGGGTGGCACTTATCTCATATGATGGAATAAATAAATATTATGCAGACTCCGTGAGGGGCCGATTCACCATCTCCAGAGACAATTCCAAGAACACCCTGTCTCTGCAAATGAACAGCCTGAAACCTGAGGACACGGCTGTGTATTACTGTGCGAGATCGGTCCGGGGCAGTTACTACTACGGTATGGACGTCTGGGGGCAAGGGACCACGGTCACCGTCTCCTCA	GACATCCAGATGACCCAGTCTCCATCTTCCCTGTCTGCATCTGTAGGAGACAGAGTCACCATCACTTGCCGGGCAAGTCAGAGCATTAGCAGTTATTTAAATTGGTATCAGCAGAAACCAGGGAAAGCCCCTAAGCTCCTGATCTATGCTGCATCCACTTTGCAAAGTGGGGTCCCATCCAGGTTCAGTGGCAGTGGATCTGGGGCAGATTTCACTCTCACCATCAGCAGTCTGCAACCTGAAGATTTTGCAACTTACTACTGTCAACAGAGTTACAGTACCCCGTACACTTTCGGCCAAGGGACCAAGGTGGAAATCAAA
228	IML3695	Pre-vax	ADI-67900	IGHV4-31*03	IGHD6-13*01	IGHJ6*02	IGKV3-20*01	IGKJ1*01	4.4	1.7	S2	No						GCGAGAGTTTCGGTAACAGCAGCTGGCGGTATGGACGTC	ARVSVTAAGGMDV	CAGCACTATGGTAGCTCACCCCTGTACACT	QHYGSSPLYT	CAGGTGCAGCTGCAGGAGTCGGGCCCAGGACTGGTGAAGCCTTCACAGACCCTGTCCCTCACCTGCACTGTCTCTGGTGGCTCCATCAGCAGTAGTTCTTACTACTGGAGCTGGATCCGCCAGCACCCAGGGAAGGGCCTGGAATGGATTGGCTACATCTATTACAGTGGGAGCACCATCTACAACCCGTCCCTCAAGAGTCGAGTTACCATATCAGGAGACACGTCGAAGAACCAGTTCTTCCTGAAGCTGAACTCTGTGACTGTCGCGGACACGGCCGTTTATTACTGTGCGAGAGTTTCGGTAACAGCAGCTGGCGGTATGGACGTCTGGGGGCAAGGGACCACGGTCACCGTCTCCTCA	GAAATTGTGTTGACGCAGTCTCCAGGCACCCTGTCTCTGTCTCCAGGGGAAAGAGCCACCCTCTCCTGCAGGGCCAGTCAGAGTGTTAGCGGCAGCTACTTAGCCTGGTACCAGCAGAAACCTGGCCAGGCTCCCAGGCTCCTCATCTATGGTGCATCCAGCAGGGCCACTGGCATCCCAGACAGGTTCAGTGGCAGTGGGTCTGGGACAGACTTCACTGTCACCATCAGCAGACTGGAGCCTGAAGATTTTGTAGTGTATTACTGTCAGCACTATGGTAGCTCACCCCTGTACACTTTCGGCCAAGGGACCAAGGTGGAAATCAAA
229	IML3695	Pre-vax	ADI-67905	IGHV3-33*01	IGHD3-16*02	IGHJ3*02	IGKV1-39*01	IGKJ1*01	4.1	3.2	S2	No						GCGAGAGCGGGGGATTACGGTGGGAACCCATATGATGCTTTTGATATC	ARAGDYGGNPYDAFDI	CAACAGAGTTACAGTTCCCCGTACACT	QQSYSSPYT	CAGGTGCAGCTGGTGGAGTCTGGGGGAGGCGTGGTCCAGCCTGGGAGGTCCCTGAGACTCTCCTGTGTAGCGTCTGGATTCACCTTCAGTCTCTATGGCATACACTGGGTCCGCCAGGCTCCAGGCAAGGGGCTGGAGTGGGTGGCGATTATATGGTATGATGGAAATACTAAATACTATGCAGACTCCGTGAAGGGCCGATTCACCATCTCCAGAGACAGTTCCAAGAACACGGTGTATCTGCAAATGAACAGCCTGAGAGCCGAGGACACGGCTATATATTACTGTGCGAGAGCGGGGGATTACGGTGGGAACCCATATGATGCTTTTGATATCTGGGGCCAAGGGACAATGGTCACCGTCTCTTCA	GACATCCAGATGACCCAGTCTCCATCCTCCCTGTCTGCATCTGTAGGAGACAGAGTCACCATCACTTGCCGGGCAAGTCAGAGCATTACTAGCTATTTAAATTGGTATCAGCAGAAACCAGGGAAAGCCCCTAAGTTCCTCATCTTTGCTGCATCCAGTTTGCCAAGTGGGGTCCCATCAAGGTTCCGTGGCAGTGGATCTGGGACCGATTTCACTCTCACCATCAGCAGTCTGCAACCTGAAGATTTTGCAACTTACTACTGTCAACAGAGTTACAGTTCCCCGTACACTTTCGGCCAAGGGACCAAGGTGGAAATCAAA
230	IML3695	Pre-vax	ADI-67906	IGHV4-39*01	IGHD6-13*01	IGHJ4*02	IGKV1-5*04	IGKJ1*01	5	2.5	S2	No						GCGAAACCCAAGGCAGCTGGCCAGTTTGACTTC	AKPKAAGQFDF	CAACACTATCTTAGTCCCCCGTGGACG	QHYLSPPWT	CAGCTGCAGCTGCAGGAGTCGGGCCCAGGACTGGTGAAGCCTTCGGAGACTCTGTCCCTCACCTGCACTGTCTCTGGTGGCTCCATCACCAGTAGTAGTTACTACTGGGACTGGATCCGCCAGTCCCCAGGGAAGGGGCTGGAGTGGATTGGGAGTATCTATTATAGTGGAACCACTCACTACAACCCGTCCCTCAAGAGTCGAGTCACCATATCCATAGACACGTCCAAGAATCAGTTCTCCCTGGACCTGAGTTCTGTGACCGCCGCAGACACGGCTGTCTATTACTGTGCGAAACCCAAGGCAGCTGGCCAGTTTGACTTCTGGGGCCAGGGCACCCTGGTCACCGTCTCCTCA	GACATCCAGATGACCCAGTCTCCTTCCACCCTGTCTGCATCTGTAGGAGACAGAGTCACCATCACTTGCCGGGCCAGTCAGAGTATTAGTAGCTGGTTGGCCTGGTATCAGCAGAAACCAGGGAAAGCCCCTAAGCTCCTGATCTATAAGGCATCTAATTTAGAAAGTGGGGTCCCATCAAGGTTCAGCGGCAGTGGATCTGGGACAGAATTCACTCTCACCATCAGCAGCCTGCTGCCTGATGACTTTGCAACTTATTATTGCCAACACTATCTTAGTCCCCCGTGGACGTTCGGCCAAGGGACCAAGGTGGAAATCAAA
231	IML3695	Pre-vax	ADI-67907	IGHV4-59*01	IGHD5-18*01	IGHJ3*02	IGKV1-39*01	IGKJ2*01	7.5	1.1	Undefined	No						GCGAGAGTCGGCTATGGCAGAAGCCGGGACGAGAATGCTTTTGATATC	ARVGYGRSRDENAFDI	CAACAGAGTTACAGTACCCTTATGTTCACT	QQSYSTLMFT	CAGGTGCAGCTGCAGGAGTCGGGCCCAGGACTGCTGAAGCCTTCGGAGACCCTGTCCCTCACCTGCACTGTCTCCGGTGGCTCCATCAGGTTTTACTCCTGGAGCTGGATCCGGCAGACCCCAGGGAAGGGACTGGAGTGCATTGGGTATTTGGCTAACAGTGGGACCACCAACTACAACCCCTCCCTCGAGAGTCGAGTCTCCATATCAGTAGACACGTCCAACCACCAGGTCTCCCTGAGGTTGACCTCTGTGACCGCTGCGGACACGGCCGTGTATTACTGTGCGAGAGTCGGCTATGGCAGAAGCCGGGACGAGAATGCTTTTGATATCTGGGGCCAAGGGACAATGGTCACCGTCTCTTCA	GACATCCAGATGACCCAGTCTCCATCCTCCCTGTCTGCATCTGTAGGAGACAGAGTCACCATCACTTGCCGGGCAAGTCAGAGCATTAGCAACTATTTAAATTGGTATCAGCAGAAACCAGGGAAAGCCCCTAAACTCCTGATCTATACTGCATCCAGTTTGCAAAGTGGGGTCCCATCAAGGTTCAGTGGCAGTGGATCTGGGACAGATTTCACTCTCACCATCAGCAGTCTGCAACCTGAAGATTTTGCAACTTACTACTGTCAACAGAGTTACAGTACCCTTATGTTCACTTTTGGCCAGGGGACCAAGCTGGAGATCAAA
232	IML3695	Pre-vax	ADI-67908	IGHV5-51*01	IGHD1-26*01	IGHJ4*02	IGKV3-15*01	IGKJ2*01	1	1.1	S2	No						GCGAGACATGGGCCTACAGTGGGACACTATGACTTC	ARHGPTVGHYDF	CACCAGTACAATAACTGGCCTTTCACT	HQYNNWPFT	GAGGTGCAGCTGGTGCAGTCTGGAGCAGAGGTGAAAAAGCCCGGGGAGTCTCTGAAGATCTCCTGTAAGGGTTCTGGATACAGCTTTACCAGCTACTGGATCGGCTGGGTGCGCCAGATGCCCGGGAAAGGCCTGGAGTGGATGGGGATCATCTCTCCTGGTGACTCTGATACCAGATACAGCCCGTCCTTCCAAGGCCAGGTCACCATCTCAGCCGACAAGTCCATCAACACCGCCTACCTGCAGTGGAGCAGCCTGAAGGCCTCGGACACCGCCCTGTATTACTGTGCGAGACATGGGCCTACAGTGGGACACTATGACTTCTGGGGCCAAGGAACCCTGGTCACCGTCTCCTCA	GAAATAGTGATGACGCAGTCTCCAGCCACCCTGTCTGTGTCTCCAGGGGAAAGAGCCACCCTCTCCTGCAGGGCCAGTCAGAGTGTTAGCAGCAACTTAGCCTGGTACCAGCAGAAACCTGGCCAGGCTCCCAGGCTCCTCATCTATGGTGCATCCACCAGGGCCACTGGTATCCCAGCCAGGTTCAGTGGCAGTGGGTCTGGGACAGAGTTCACTCTCACCATCAGCAGCCTGCAGTCTGAAGATTTTGCAGTTTATTACTGCCACCAGTACAATAACTGGCCTTTCACTTTTGGCCAGGGGACCAAGCTGGAGATCAAA
233	IML3695	Pre-vax	ADI-67909	IGHV4-59*01	IGHD1-26*01	IGHJ6*02	IGKV3-20*01	IGKJ1*01	3.1	3.5	Undefined	No						GCGAGAGTAGGGTTGGGTGGGAACTACTACGGCTACTACTACTACGCTATGGACGTC	ARVGLGGNYYGYYYYAMDV	CACCACTATGGTAGCTCACCTCAAGCG	HHYGSSPQA	CAGGTGCAGCTGCAGGAGTCGGGCCCAGGACTGGTGAAGCCCTCGGAGACCCTGTCCCTCACCTGCACTGTCTCTGGTGGCTCCATCAGTAGTTACTACTGGAGCTGGATCCGGCAGCCCCCAGGGAAGGGACTGGAGTGGATTGGGTATTTGTATGACAGTGGGAACACCAACTACAACCCCTCCCTCAAGGGTCGAGTCACCATTTCAGTAGACACGTCCAACAACCAGGTCTCCCTGAAGCTGAGCTCTGTGACCGCTGCGGACACGGCCGTGTATTACTGTGCGAGAGTAGGGTTGGGTGGGAACTACTACGGCTACTACTACTACGCTATGGACGTCTGGGGGCAAGGGACCACGGTCACCGTCTCCTCA	GAAATTGTGTTGACGCAGTCTCCAGGCACCCTGTCTTTGTCTCCAGGGGAAAGAGCCACCCTCTCCTGCAGGGCCAGTCAGAGTGTTAACTCCAACTACTTAAACTGGTTCCAGCAGAAACCTGGCCAGGCTCCCAGGCTCCTCATCTATGGTGCATCCAGCAGGGCCACTGGCATCCCAGACAGGTTCAGGGGCAGTGGGTCTGGGACAGACTTCACTCTCACCATCAGCAGACTGGAGCCTGAAGATTTTGCAGTGTATTACTGTCACCACTATGGTAGCTCACCTCAAGCGTTCGGCCAAGGGACCAAGGTGGAAATCAAA
234	IML3695	Pre-vax	ADI-67910	IGHV3-15*01	IGHD3-3*01	IGHJ1*01	IGLV1-51*01	IGLJ7*01	5.7	3.4	RBD	No			>1.0	>1.0		ACCACAATCAACCGAAAATACGATTTTTGGAGTGGTTATTCGGCCGAACAGCTGCAC	TTINRKYDFWSGYSAEQLH	GCATGGGATGACAGCCTGAATGCTGGAGTG	AWDDSLNAGV	GAGGTGCAGCTGGTGGAGTCTGGGGGAGGCTTGGTGAAGCCTGGGGGGTCCCTTAGACTCTCCTGTGAAGCCTCTGGACTCAGTTTCAGTAGTTCCTGGATGACCTGGGTCCGCCAGGCTCCAGGGAAGGGGCTGGAGTGGGTTGGCCGTATTAAAATCAGAAAAGATGGTGGGACAACAGATTATGCTGCACCCGTGAAAGGCAGATTCACCATCTCAAGAGATGATTCAAAAAACACGCTCTATCTGCAAATGAACAGCCTGGAAACCGAGGACACAGCCGTGTATTATTGTACCACAATCAACCGAAAATACGATTTTTGGAGTGGTTATTCGGCCGAACAGCTGCACTGGGGCCAGGGCACCCTGGTCACCGTCTCCTCA	CAGTCTGTGTTGACGCAGCCGCCCTCAGTGTCTGCAGCCCCGGGACAGAAGGTCACCATCTCCTGCTCTGGAAACAGCTCCAACATTGGAACTAATTATGTATCCTGGTACCAGCAGCTCCCAGGAACAGCCCCCAAACTCCTCATTTATGACAATAATGAGCGACCCTCAGGGATTCCTGACCGATTCTCTGGCTCCAAGTCTGGCACGTCAGCCACCCTGGGCATCACCGGACTCCAGACTGGGGACGAGGCCGATTATTACTGCGGAGCATGGGATGACAGCCTGAATGCTGGAGTGTTCGGAGGAGGCACCCAGCTGACCGTCCTC
235	IML3695	Pre-vax	ADI-67914	IGHV3-33*01	IGHD6-13*01	IGHJ4*02	IGKV1-5*03	IGKJ1*01	1.7	2.1	S2	Yes						GCGAGAGGGTCGGCAGCTGGTGACTAC	ARGSAAGDY	CAACACTATAATAGTTATTCGGGGACG	QHYNSYSGT	CAGGTGCAGCTGGTGGAGTCTGGGGGAGGCGTGGTCCAGCCTGGGAGGTCCCTGAGACTCTCCTGTGCAGCGTCTGGATTCACCTTCAGTATCTATGGCATGCACTGGGTCCGCCAGGCTCCAGGCAAGGGGCTGGAGTGGGTGGCAGTTATATGGCATGATGGAACTAATAAATACTATGCAGACTCCGTGAAGGGCCGATTCACCATCTCCAGAGACAATTCCAAAAACACGCTGTTTCTGCAAATGAACAGCCTGAGAGCCGAGGACACGGCTGTGTATTACTGTGCGAGAGGGTCGGCAGCTGGTGACTACTGGGGCCAAGGAACCCTGGTCACCGTCTCCTCA	GACATCCAGATGACCCAGTCTCCTTCCACCCTGTCTGCATCTGTAGGAGACAGAGTCACCATCACTTGCCGGGCCAGTCAGAGTATTAGTAGCTGGTTGGCCTGGTATCAGCAGAAACCAGGGAAAGCCCCAAAGCTCCTGATCTTTAAGGCGTCTAGTTTACAAAGTGGGGTCCCATCAAGATTCAGCGGCAGTGGATCTGGGGCAGAATTCACTCTCACCATCAGCAGCCTGCAGCCTGATGATTTTGCAACTTATTACTGCCAACACTATAATAGTTATTCGGGGACGTTCGGCCAAGGGACCAAGGTGGAAATCAAA
236	IML3695	Pre-vax	ADI-67923	IGHV4-34*01	IGHD1-1*01	IGHJ6*02	IGKV3-20*01	IGKJ1*01	6.5	3.8	Undefined	No						GCGAGAGGGGGGGCTGGCTATCTACCTGGTACAATACAATACTACTACTACTACGCTATGGACGTC	ARGGAGYLPGTIQYYYYYAMDV	CAGTATTATGGTGACTCACCCGCCCAGTACACT	QYYGDSPAQYT	CAGGTGCAGCTACAACAGTGGGGCGCAGGGCTGTTGAAGCCTTCGGACACCCTGTCCCTCACCTGCGCTGTCTATGGTGGGTCCTTCAGTGATTTTTACTGGAGCTGGATCCGCCAGTCCCCAGGGAAGGGGCTGGAGTGGATTGGGAAAATCCATCGTAGTGGAACCATCAACTACAACCCGTCCCTCCAGAGTCGAGTCACCATATCACTAGACACGTCCAAGAACCAGGTGTCCCTGAAGCTGAGCTCTGTGACCGCCGCGGACACGGCTCTATATTTCTGTGCGAGAGGGGGGGCTGGCTATCTACCTGGTACAATACAATACTACTACTACTACGCTATGGACGTCTGGGGGCAAGGGACCACGGTCACCGTCTCCTCA	GAAATTGTGTTGACGCAGTCTCCAGGCACCCTGTCTTTGTCTCCAGGGGAAAGAGCCACCCTCTCCTGCAGGGCCAGTCAGAGTGTTAGCAGCAGCCACTTAGCCTGGTACCAGCAGAAACCTGGCCAGGCTCCCAGGCTCCTCATCTATGGTGCGTCTACCAGGGCCACTGACATCCCAGACAGGTTCAGTGGCAGTGGGTCTGGGACAGACTTCACTGTCACCATCAGCAGACTGGACCCTGAAGATTTTGCAGTGTATTACTGTCAGTATTATGGTGACTCACCCGCCCAGTACACTTTCGGCCAAGGGACCAAGGTGGAAATCAAA
237	IML3695	Pre-vax	ADI-67924	IGHV1-46*01	IGHD3-3*01	IGHJ6*02	IGKV2-28*01	IGKJ5*01	2.7	0.3	S2	No						GCGAGAGCAAACAATAAAAGTCTGGAGTGGTTATTCTCGGGTTCCTACTACTACTACGGTATGGACGTC	ARANNKSLEWLFSGSYYYYGMDV	ATGCAGGCTCTACAAACTCCTATCACC	MQALQTPIT	CAGGTGCAGCTGGTGCAGTCTGGGGCTGAGGTGAAGAAGCCTGGGGCCTCAGTGAAGGTTTCCTGCAAGGCATCTGGATACACCTTCACCAGCTACTATATGCACTGGGTGCGACAGGCCCCTGGACAAGGGCTTGAGTGGCTGGGAATAATCAACCCTAGAGGCGGTGGCACAAGCTACGCACAGAAGTTCCGGGGCAGAGTCACCATGACCGGGGACACGTCCACGAGCACAGTCCACATGGAGCTGAGCAGCCTGAGATCTGAGGACGCGGCCGTGTATTACTGTGCGAGAGCAAACAATAAAAGTCTGGAGTGGTTATTCTCGGGTTCCTACTACTACTACGGTATGGACGTCTGGGGGCAAGGGACCACGGTCACCGTCTCCTCA	GATATTGTGATGACTCAGTCTCCACTCTCCCTGCCCGTCACCCCTGGAGAGCCGGCCTCCATCTCCTGCAGGTCTAGTCAGAGCCTCCTGCATAGTAATGGATACAACTATTTGGATTGGTACCTGCAGAAGCCAGGGCAGTCTCCACAGCTCCTGATCTATTTGGGTTCTAATCGGGCCTCCGGGGTCCCTGACAGGTTCAGTGGCAGTGGATCAGGCACAGATTTTACACTGAAAATCAGCAGAGTGGAGGCTGAGGATGTTGGGGTTTATTACTGCATGCAGGCTCTACAAACTCCTATCACCTTCGGCCAAGGGACACGACTGGAGATTAAA
238	IML3695	Pre-vax	ADI-67927	IGHV4-39*01	IGHD2-15*01	IGHJ4*02	IGLV1-40*02	IGLJ2*01	5.7	2.4	S2	Yes						GCGAGACGGGGTGGGGCTGCCACTGTAAATTTTGACTCC	ARRGGAATVNFDS	CAGTCCTATGACAGCAGACTGAGTGGACAAGGAAATGTGGTC	QSYDSRLSGQGNVV	CAGCTGCAGCTGCAGGAGTCGGGCCCAGGATTGGTGAAGCCTTCGGAGACCCTGTCCCTCACCTGCACTGTCTCTGGTGGCTCCATCAGCAGTAATAGTTACTACTGGGCCTGGATCCGCCAGCCCCCAGGGAAGGGGCTGGAGTGGATTGGGAGTATCAATTATAGTGGAAGCACCCACTACAATGCGTCCCTCAAGAGTCGACTCACCACATCCGCGGACACGTCCAGGAACCAGTTGTCACTGAAGCTGAGCTCTGTGACCGCCGCAGACACGGCTGTCTATTACTGCGCGAGACGGGGTGGGGCTGCCACTGTAAATTTTGACTCCTGGGGCCAAGGAACCCTGGTCACCGTCTCCTCA	CAGTCTGTCGTGACGCAGCCGCCCTCAGTGTCTGGGGCCCCAGGGCAGAGGGTCACCGTCTCCTGCACTGGGAGCAGCTCCAACATCGGGGCAGGTTTTGATGTACACTGGTACCAGCAGCTTCCAGGAACAGCCCCCAAACTCCTCATCTATGATAACAACAATCGGCCCTCAGGGGTCCCTGACCGATTCTCTGGCTCCAAGTCTGGCACCTCAGCCTCCCTGGCCATCACTGGGCTCCAGACTGGGGATGAGGCTGATTATTACTGCCAGTCCTATGACAGCAGACTGAGTGGACAAGGAAATGTGGTCTTCGGCGGAGGGACCAAGCTGACCGTCCTA
239	IML3695	Pre-vax	ADI-67928	IGHV4-59*01		IGHJ4*02	IGKV4-1*01	IGKJ1*01	5.8	4.3	S2	No						GCGAGAGAAAATCGGAATAACTACGTGGACTAC	ARENRNNYVDY	CAGCAATATTTTAATACTCCGTGGACG	QQYFNTPWT	CAGGTGCAGCTGCAGGAGTCGGGCCCAGGACTGGTGAAGCCTTCGGAGACCCTGTCCCTCACCTGCACAGTGTCTGGTGGCTCCATCACTAGTCACTTCTGGAGCTGGATCCGGCAGTCCCCAGGGAAGGGACTGGAGTGGATTGGCTATATCTATTATAGAGGGAGCACCAACTACAACCCCTCCCTCAAGAGTCGAGTCCTCATGTCAGTAGACACGTCGAGGAACCAGTTCTCCCTGAACCTCAGCTCTGTGACCGCTGCAGACACGGCCGTGTATTACTGTGCGAGAGAAAATCGGAATAACTACGTGGACTACTGGGGCCAAGGAACCCTGGTCACCGTCTCCTCA	GACATCGTGATGACCCAGTCTCCAGACTCCCTGGCTGTGTCTCTGGGCGAGAGGGCCACCATCAACTGCCAATCCAGCCAGAGTGTTGTGTTCAGCTCCAACAATAAGAGGTACTTAGCTTGGTACCAGCAGAAACCAGGTCAGCCTCCTAAGCTGCTCCTTTACTGGGCATCTACCCGGGAATCCGGGGTCCCTGACCGATTCAGTGGCAGCGGGTCTGGGACAGATTTCACTCTCACCATCAGCAGCCTGCAGGCTGAAGATGCGGCAGTTTATTTCTGTCAGCAATATTTTAATACTCCGTGGACGTTCGGCCAAGGGACCAAGGTGGAAATCAAA
240	IML3695	Pre-vax	ADI-67933	IGHV3-13*01	IGHD3-10*01	IGHJ6*02	IGLV3-27*01	IGLJ3*02	5.5	4.2	Undefined	No						CTAAGGGGTGGGGCTCGGGGAGTTATCAGGGAGGACCACTACTACGATATGGACGTC	LRGGARGVIREDHYYDMDV	TACTCTGTGGCTGGCAACAATCTAGGGTGGGTG	YSVAGNNLGWV	GAGGTGCAGCTGGTGGAGTCTGGGGGAGGCTTGGTACAGCCGGGGGGGTCCCTGAGACTCTCCTGTGCAGCCTCTGGATTCATCTTCAGTAATTACGACATGCACTGGGTCCGCCAGGCTACAGGAAAAGGTCTGGAGTGGGTCTCAGTTATTGGAACTGCTGGTGACACATACTATGCAGACTCCGTGAAGGGCCGATTCACCATCTCCAGAGAAAATGCCAAGAACTCCTTCTACCTTCAAATGAACAGCCTGAGAGGCGGGGACTCGGCTGTTTATTACTGTCTAAGGGGTGGGGCTCGGGGAGTTATCAGGGAGGACCACTACTACGATATGGACGTCTGGGGGCAAGGGACCACGGTCACCGTCTCCTCA	TCCTATGAGCTGACACAGCCACCCTCAGTGTCAGTGTCTCCGGGACAGACAGCCAGTATCACCTGCTCAGGAGACGTCCTGGCGAAAAAATATGCTCGGTGGTTCCAGCAGAAGCCAGGCCAGGCCCCTGTGTTGCTGATTTATAAGGACACTGATCGGCCCTCAGGGATCCCTGAGCGATTCTCCGGCTCCAGCTCAGGGACCACAGTCACCTTGACCATCAGCGGGGCCCAGGTTGAGGATGAGGCTGACTATTACTGTTACTCTGTGGCTGGCAACAATCTAGGGTGGGTGTTCGGCGGAGGGACCAAGCTGACCGTCCTA
241	IML3695	Pre-vax	ADI-67935	IGHV4-31*03	IGHD3-10*01	IGHJ4*02	IGKV3-20*01	IGKJ1*01	5	2.1	RBD	No		0.048		0.039		GCGAGAGGTCCATATGCTTCGGGGAGTTTTGACTCC	ARGPYASGSFDS	CACCACTATGGTAGCTCAGGGGACACT	HHYGSSGDT	CAGGTGCAGCTGCAGGAGTCGGGCCCAGGACTGGTGAAGCCTTCACAGACCCTGTCCCTCACCTGCACTGTCTCTGGCGGCTCCTTAAGCAGTGGTGGTTACTACTGGACCTGGATCCGCCAGCACCCAGGGAAGGGCCTGGAGTGGATTGGACACATCTATTACACTGGGGTCACCTACTACAATTCGTCCCTCAAGAGTCGAGTTACCATATCAGAAGACAAGTCTAAGAACCAGTTCTCCCTGAAGCTGACCTCTGTGACTGCCGCGGACACGGCCGTATATTACTGTGCGAGAGGTCCATATGCTTCGGGGAGTTTTGACTCCTGGGGCCAAGGAACCCTGGTCACCGTCTCCTCA	GAAATTGTGTTGACGCAGTCTCCAGGCACCCTGTCTTTGTCTCCAGGGGAAAGAGCCACCCTCTCCTGCAGGGCCAGTCAGAGTGTTAGCAGCAACTACTTAGCCTGGTACCAGCAGAAACCTGGCCAGGCTCCCAGGCTCCTCATCTATGTTGCATCCAGCAGGGCCACTGGCATCCCAGACAGGTTCAGTGGCAGTGGGTCTGGGACAGACTTCACTCTCACCATCAGCAGACTGGAGCCTGAAGATTCTGGAGTGTATTACTGTCACCACTATGGTAGCTCAGGGGACACTTTCGGCCAAGGGACCAAGGTGGAAATCAAA
242	IML3695	Pre-vax	ADI-67939	IGHV4-59*01	IGHD3-10*01	IGHJ6*02	IGKV3-20*01	IGKJ1*01	3.4	3.1	S2	No						GCGAGGGGGTTCGACCTC	ARGFDL	CTGCAATATGGTACCTCACCGTGGACG	LQYGTSPWT	CAGGTGCAGCTGCAGGAGTCGGGCCCAGGACTGGTGAAGCCTTCGGAGACCCTGTCCCTCACCTGCACTGTCTCTGGTGCCTCCATCAGTAATTACTACTGGAGTTGGTTCCGGCAGTCCCCAGGGCAGGGACTGGAGTGGATTGGGTATATCTATTACAGTGGGAGCACCAACTACAACCCCTCCCTCAAGAGTCGAGTCACCACATCAGTAGACACGTCCAAGAACCAGTTCTCCCTGAAGGTTAACTCTGTGACCGCTGCGGACACGGCCGTGTATTACTGTGCGAGGGGGTTCGACCTCTGGGGGCAAGGGACCACGGTCACCGTCTCCTCA	GAAATTGTGTTGACGCAGTCTCCAGGCACCCTGTCTTTGTCTCCAGGAGAGAGAGCCACCCTCTCCTGCAGGGCCAGTCAGAGTGTTAGCAGCAGTTACTTAGCCTGGTACCAGCAGAAACCTGGCCAGGCTCCCAGGCTCCTCATCTATGCTGCATCCAGCAGGGCCATTGGCATCCCAGACAGGTTCAGTGGCAGTGGGTCTGGGACAGACTTCACTCTCACCATCACCAGACTGGAGCCTGAAGATTTTGCAGTGTATTACTGTCTGCAATATGGTACCTCACCGTGGACGTTCGGCCAAGGGACCAAGGTGGAAATCAAA
243	IML3695	Pre-vax	ADI-67941	IGHV3-33*01	IGHD2-2*01	IGHJ6*02	IGLV2-14*03	IGLJ1*01	4.4	1.7	S2	No		>1.0				GCGAGGGTTTATTGTAGTAGAGGTCTATGCCATCATGAAGCCTACTACTACTACGCTATGGGCGTC	ARVYCSRGLCHHEAYYYYAMGV	AGCTCATATACAAGCAGCGGCACTCTTTATGTC	SSYTSSGTLYV	CAGGTGCAGCTGGTGGAGTCTGGGGGAGGCGTGGTCCAGCCTGGGAGGTCCCTGAGACTCTCCTGTGCAGTGTCTGGATTCACCTTCAGTACTTATGGCATGCACTGGGTCCGCCAGGCTCCAGGCAAGGGGCTGGAGTGGGTGGCACTTATATGGTATGATGGAAGTGAGAAAAAGTATTCGGACTCCGTGAAGGGCCGATTCACCATCTCCAGAGACAATTCCAAGAACACTCTGTATCTGCACATGAACAGCCTGAGAGCCGAGGACACGGCTGTATATTACTGTGCGAGGGTTTATTGTAGTAGAGGTCTATGCCATCATGAAGCCTACTACTACTACGCTATGGGCGTCTGGGGGCAAGGGACCACGGTCACCGTCTCCTCA	CAGTCTGCCCTGACTCAGCCTGCCTCCGTGTCTGGGTCTCCTGGACAGTCGATCACCATCTCCTGTACTGGAACCAGCAATGACGTTGGTGCTTATACCTATGTCTCCTGGTACCAACAACACCCAGGCAAAGCCCCCAAACTCATGATTTATGATGTCAGTAATCGGCCCTCAGGGGTTTCTAATCGCTTCTCTGGCTCCAAGTCTGGCAACACGGCCTCCCTGACCATCTCTGGGCTCCAGGCTGAGGACGAGGCTGATTATTACTGCAGCTCATATACAAGCAGCGGCACTCTTTATGTCTTCGGAACTGGGACCAAGGTCACCGTCCTA
244	IML3695	Pre-vax	ADI-67943	IGHV3-23*01		IGHJ5*02	IGLV2-11*01	IGLJ3*02	8	3.1	S2	No						GACAACTGGTTCGACCCC	DNWFDP	TCATATGCAGGCAGTTACACTTGGGTG	SYAGSYTWV	GAGGTGCAGCTGTTGGAGTCTGGGGGAGGCTTGGTACAGCCTGGGGGGTCCCTGAGACTCTCCTGTGTTTCCTCTGTATTCACCTTTAGCACCTATGCCATGAGCTGGGTCCGCCAGGCTCCAGGGAAGGGGCTCGAGTGGGTCTCAACTATTACTGGTAGTGGGTATAACACATACTTCGCAGACTCCGTGAAGGGCCGGTTCTCCATCTCCAGAGACAATTCGAAGAACACGGTATATCTGCAAATGACTGCCCTGAGAGCCGAGGACACGGCCGTTTATTATTGTGACAACTGGTTCGACCCCTGGGGCCAGGGAACCCTGGTCACCGTCTCCTCA	CAGTCTGCCCTGACTCAGCCTCGCTCAGTGTCCGGGTCTCCTGGACAGTCAGTCACCATCTCCTGCACTGGAACCAACAGTGATATTGGTGGTTATAACTATGTCTCCTGGTACCAACAACACCCAGGCCAAGCCCCCAAAGTCATGATTTATGATGTCAATAAGCGGCCCTCAGGGGTCCCTGATCGTCTCTCTGGCTCCAAGTCTGGCAACACGGCCTCCCTGACCATCTCTGGGCTCCAGGCTGAGGATGAGGCTGATTATTACTGCTGCTCATATGCAGGCAGTTACACTTGGGTGTTCGGCGGAGGGACCAAGCTGACCGTCCTA
245	IML3695	Pre-vax	ADI-67945	IGHV3-30-3*01	IGHD1-26*01	IGHJ3*02	IGKV4-1*01	IGKJ3*01	3.4	1	S2	No		>1.0		>1.0		GCGAGAGGAGGTGGGAGCTACTTTCATGCTTTTGATATC	ARGGGSYFHAFDI	CAGGAATATTATAGTAATCCATTCACT	QEYYSNPFT	CAGGTGCAGCTGGTGGAGTCTGGGGGAGGCGTGGTCCAGCCTGGGAGGTCCCGGAGAGTCTCCTGTGCAGCCTCTGGATTCATCTTCAATACCTATGCTATGCACTGGGTCCGCCAGGCTCCAGGCAACGGGCTGGAGTGGGTGGCAGTTATATCATATGATGGAAACAATAAATACTACGCAGACTCCGTGAGGGGCCGATTCACCATCTCCAGAGACAACTCCAAGAACACGCTGTATCTGCAAATGCACAGCCTGAGAGCTGAGGACACGGCTGTGTATTACTGTGCGAGAGGAGGTGGGAGCTACTTTCATGCTTTTGATATCTGGGGCCAAGGGACAATGGTCACCGTCTCTTCA	GACATCGTGATGACCCAGTCTCCAGACTCCCTGGCTGTGTCTCTGGGCGAGAGGGCCACCATCAACTGCAAGTCCAGCCAGAGTGTTTTATACAGCTCCAACAATAAGAACTACTTAGCTTGGTACCAGCAGAAACCAGGACAGCCTCCTAAGCTGCTCATTTACTGGGCATCTACCCGGGATTCCGGGGTCCCTGACCGATTCAGTGGCAGCGGGTCTGGGACAGATTTCACTCTCACCATCAGCAGCCTGCAGGCTGAAGATGTGGCAGTTTATTACTGTCAGGAATATTATAGTAATCCATTCACTTTCGGCCCTGGGACCAAAGTGGATATCAAA
246	IML3695	Pre-vax	ADI-67946	IGHV3-7*01	IGHD3-9*01	IGHJ4*02	IGKV1-39*01	IGKJ1*01	1	2.4	Undefined	No						GCGACCGAGGCCCAATTACGATATTTTGACTGGTTATCGACTCCGTACTTTGACTAC	ATEAQLRYFDWLSTPYFDY	CAACAGAGTTACAGTATCCCTCGGACG	QQSYSIPRT	GAGGTGCAGCTGGTGGAGTCTGGGGGAGGCTTGGTCCAGCCTGGGGGGTCCCTGAGACTCTCCTGTGCAGCCTCTGGATTCATCTTTAGTAGCTATTGGATGAGCTGGGTCCGCCAGGCTCCAGGGAAGGGGCTGGAGTGGGTGGCCAACATCAAGCAAGATGGAAGTGAGAAATACTATGTGGACTCTGTGAAGGGCCGATTCACCATCTCCAGAGACAACGCCAAGAACTCACTGTTTCTGCAAATGAACAGCCTGAGAGCCGAGGACACGGCTGTGTATTACTGTGCGACCGAGGCCCAATTACGATATTTTGACTGGTTATCGACTCCGTACTTTGACTACTGGGGCCAAGGAACCCTGGTCACCGTCTCCTCA	GACATCCAGATGACCCAGTCTCCATCCTCCCTGTCTGCATCTGTGGGAGACAGAGTCACCATCACTTGCCGGGCAAGTCAGAGCATTCGCACCTATTTAAATTGGTATCAGCAGAAACCAGGGAAAGCCCCTAAGCTCCTGATTAATGCTGCATCCAGTTTGCAAGGTGGGGTCCCATCAAGGTTCAGTGGCAGTGGATCTGGGACAGATTTCACTCTCACCATCAGCAGTCTGCAACCTGAAGATTTTGCAACTTACTACTGTCAACAGAGTTACAGTATCCCTCGGACGTTCGGCCAAGGGACCAAGGTGGAAATCAAA
247	IML3695	Pre-vax	ADI-67947	IGHV2-70*04	IGHD2-2*01	IGHJ2*01	IGLV2-11*01	IGLJ2*01	5	3.4	S2	No		>1.0				GCACGGATTGGTTGTAGTACAACCAGCTGCTGGTGGTACTTCGATGTC	ARIGCSTTSCWWYFDV	TCATATGCAGGCGGCTATTCCGTACTA	SYAGGYSVL	CAGGTCACCTTGAAGGAGTCTGGTCCTGCGCTGGTGAAACCCACACAGACCCTCACACTGACCTGCACCTTCTCTGGGTACTCAGTCAGTACTTATGGAATGCGTATGAGCTGGATCCGTCAGCCCCCAGGGAAGGCCCTGGAGTGGCTTGCATCCATTAGTTGGGATGATGATAAATTCTACAACTCATCTCTGAGGACCAGGCTCACCATCTCCAAGGACACCTCGAAAAACCAGGTGATCCTTACAATGACCAACATGGACCCTGTGGACACAGCCACGTATTACTGTGCACGGATTGGTTGTAGTACAACCAGCTGCTGGTGGTACTTCGATGTCTGGGGCCGTGGCACCCTGGTCACTGTCTCCTCA	CAGTCTGCCCTGACTCAGCCTCGCTCAGTGTCCGGGTCTCCTGGACAGTCAGTCACCATCTCCTGCACTGGAACCAGCAGTGATGTTGGTGGTTATGACTATGTCTCCTGGTACCAACACCACCCAGACAAAGCCCCCAAAATCATAATTTATGATGTCACTAAGCGGCCCTCAGGGGTCTCTGATCGCTTCTCTGGCTCCAAGTCTGGCAACACGGCCTCCCTGACCATCTCTGGGCTCCAGGCTGAAGATGAAGCTGATTATTACTGCTGCTCATATGCAGGCGGCTATTCCGTACTATTCGGCGGAGGGACCAAGCTGACCGTCCTA
248	IML3695	Pre-vax	ADI-67950	IGHV4-4*07	IGHD3-3*01	IGHJ6*02	IGLV2-8*01	IGLJ2*01	5.5	2	S2	No						GCGAGAGATGCCAGGGGGTATTACGATCTTTGGACTGGTTCTAACCCCTGGGAGTTCTACTACGGTTTCGACGTC	ARDARGYYDLWTGSNPWEFYYGFDV	AGCTCATATGCAGGCATCAACAATTATGTGGTT	SSYAGINNYVV	CAGGTGCAGCTGCAGGAGTCGGGCCCAGGAGTGGTGAAGCCTTCGGAGACCCTGTCCCTCACCTGCAGTGTCTCTGGTGGCTCCATCAGTAGTTACTCCTGGAGTTGGATCCGGCAACCCGCCGGGGAGGGCCTGGAGTGGATTGGGCGTATCTATGCCGGTGGGAGCACCAACTACAACCCCTCCCTCAAGAGTCGAGTCACCATGGCAGCTGATACGTCCAGGAACCAGTTCTCCCTGAAACTGAGCTCTGTGACTGCCGCGGACACGGCCGTGTATTACTGTGCGAGAGATGCCAGGGGGTATTACGATCTTTGGACTGGTTCTAACCCCTGGGAGTTCTACTACGGTTTCGACGTCTGGGGGCAAGGGACCACGGTCACCGTCTCCTCA	CAGTCTGCCCTGACTCAGCCTCCCTCCGCGTCCGGGTCTCCTGGACAGTCAGTCACCATCTCCTGCACTGGAACCAGCAGTGACGTTGGTGGTTATAACTATGTCTCGTGGTACCAACAGCACCCAGGCAAAGTCCCCAAACTCATGATTTATGAGGTCGATAAGCGGCCCTCAGGGGTCCCTGATCGCTTCTCTGGCTCCAAGTCTGGCAACACGGCCTCCCTGACCGTCTCTGGGCTCCAGGCTGAGGATGAGGCTAATTATTACTGCAGCTCATATGCAGGCATCAACAATTATGTGGTTTTCGGCGGAGGGACCAAGCTGACCGTCCTA
249	IML3695	Pre-vax	ADI-67952	IGHV4-39*01	IGHD3-22*01	IGHJ2*01	IGLV2-23*02	IGLJ2*01	3.3	3.7	Undefined	No		>1.0				GCGAGACATCTTGTGCCGACGTTTTCCTATGACAGTCGTGGTTATTCCCGTATATATCCGTACTGGTACTTCGATCTC	ARHLVPTFSYDSRGYSRIYPYWYFDL	TCATACGCAGGTAGTGGTACTTTTGTACTT	SYAGSGTFVL	CAGCTGCAGCTGCAGGAGTCGGGCCCAGGACTGGTGAAGCCTTCGGAGACCCTGTCCCTTACCTGCACTGTCTCTGGTGCCTCCATCAGCAGTAGTAGCTACTATTGGGGCTGGATCCGCCAGCCCCCAGGGAAGGGGCTGGAGTGGATTGGGAATATCTATTATAGTGGGAGCACCTACTACAAGGCGTCCCTCAAGAGTCGAGTCACCATATCCGTAGACACGTCCAAGAACCAGTTCTCCCTGAAACTGAACTCTGTGACCGCCGCAGACACGGCTGTGTATTTCTGTGCGAGACATCTTGTGCCGACGTTTTCCTATGACAGTCGTGGTTATTCCCGTATATATCCGTACTGGTACTTCGATCTCTGGGGCCGTGGCACCCTGGTCACTGTCTCC…	CAGTCTGCCCTGACTCAGCCTGCCTCCGTGTCTGGGTCTCCTGGACAGTCGATCACCATCTCCTGCACTGGAACCAGCAGTGATATTGGGAGTTATAACCTTGTCTCCTGGTACCGACAACACCCAGGCAAAGCCCCCGAACTCCTGATTTATGACGTCAATAAGCGGCCCTCAGGGGTTTCTAATCGCTTCTCTGGCTCCAAGTCTGGCAACACGGCCTCCCTGACAATCTCTGGGCTCCAGGATGAGGACGAGGCTGATTATTACTGCTGCTCATACGCAGGTAGTGGTACTTTTGTACTTTTCGGCGGAGGGACCAAGCTGACCGTCCTA
250	IML3695	Pre-vax	ADI-67953	IGHV1-69*01	IGHD3-10*01	IGHJ6*02	IGLV2-8*01	IGLJ2*01	4.4	1	S2	No						GCGAGAGATCCGCCTATGGTTCGGGAATTTATTCCTTATTACTACTACTACGGTATGGACGTC	ARDPPMVREFIPYYYYYGMDV	AGCTCATATGCAGGCAGCAATAATTTTGTGGTA	SSYAGSNNFVV	CAGGTGCAGCTGGTGCAGTCTGGGGCTGAGGTGAAGAAGCCTGGGTCCTCGGTGAAGGTCTCCTGCAAGACTTATGGAGGCACCCTCAGCACCTATGCTATCAGCTGGGTGCGACAGGCCCCTGGACAAGGGCTTGAGTGGATGGGAGGGATCATCCCTGTGTTTGGTACTACAAACTACGCACAGAAGTTCCAGGGCAGAGTCACCATTACCGCGGACGAATCCGCGAATACAGCCTACATGGAGCTGACCAGCCTGAGATCTGAGGACACGGCCGTGTATTACTGTGCGAGAGATCCGCCTATGGTTCGGGAATTTATTCCTTATTACTACTACTACGGTATGGACGTCTGGGGGCAAGGGACCACGGTCACCGTCTCCTCA	CAGTCTGCCCTGACTCAGCCTCCCTCCGCGTCCGGGTCTCCTGGACAGTCAGTCACCATCTCCTGCACTGGAACCAGCAGTGACGTTGGTGGTTATAATTATGTCTCCTGGTACCAACAGCACCCAGGCAAAGCCCCCAAACTCATGATTTATGAGGTCAGTAAGCGGCCCTTAGGGGTCCCTGATCGCTTCTCTGGCTCCAAGTCTGGCAACACGGCCTCCCTGACCGTCTCTGGGCTCCAGGCTGAGGATGAGGCTGATTATTACTGCAGCTCATATGCAGGCAGCAATAATTTTGTGGTATTCGGCGGAGGGACCAAGCTGACCGTCCTA
251	IML3695	Pre-vax	ADI-67954	IGHV3-33*01	IGHD2-15*01	IGHJ2*01	IGLV3-1*01	IGLJ2*01	4.1	3.5	Undefined	No						GCGAGAGACTCTTGTGGTGGTGGTGGTTGCTACCTCAACTGGTTCCTCGATCTC	ARDSCGGGGCYLNWFLDL	CAGGCGTGGGACAGCACCACTTATGTGGTG	QAWDSTTYVV	CAGGTGCAGCTGGTGGAGTCTGGGGGAGGCGTGGTCCAGCCTGGGAGGTCCCTGAGACTCTCCTGTGCAGCGTCTGGATTCACCTTCGGAAGCTATGGCATACACTGGGTCCGCCAGGCTCCAGGCAAGGGGCTGGAGTGGGTGGCAGTCATATGGTCTGATGGAGGTAATTGGTACTATGCAGACTCCGTGAAGGGCCGATTCACCATCTCCAGAGACAATTCCAAGAATACGTTGTATCTGCAAATGAACAGCCTGAGAGCCGAGGACACGGCTGTCTATTACTGTGCGAGAGACTCTTGTGGTGGTGGTGGTTGCTACCTCAACTGGTTCCTCGATCTCTGGGGCCGTGGCACCCTGGTCACTGTCTCCTCA	TCCTATGAGCTGACTCAGCCACCCTCAGTGTCCGTGTCCCCAGGACAGACAGCCAGCATCACCTGCTCTGGAGATAAATTGGGGGATGAGTATGCTTCCTGGTATCAGCAGAAGCCAGGCCAGTCCCCTGTACTGGTCATCTATCAAGATAACAAGCGCCCCTCAGGGATCCCTGAGCGATTCTCCGGCTCCGGCTCTGGGAACACAGCCACTCTGACCATCAGCGGGACCCAGGCTATGGATGAGGCTGACTATTACTGTCAGGCGTGGGACAGCACCACTTATGTGGTGTTCGGCGGAGGGACCAAGCTGACCGTCCTA
252	IML3695	Pre-vax	ADI-67961	IGHV4-59*01	IGHD3-3*01	IGHJ6*02	IGKV2-28*01	IGKJ4*01	0.3	0	S2	No						GCGACCTCTCAAGAGGGTCGATATTACGATTTTTGGAGTAATTATTATAGTCGTGCTGGCTACTACGCTATGGACGTC	ATSQEGRYYDFWSNYYSRAGYYAMDV	ATGCAAGCTCTACAAACTCCCGCT	MQALQTPA	CAGGTGCAGCTGCAGGAGTCGGGCCCAGGACTGGTGAAGCCTTCGGAGACCCTGTCCCTCACCTGCACTGTCTCTGGTGGCTCCATCAGTAGTTACTACTGGAGCTGGATCCGGCAGCCCCCAGGGAAGGGACTGGAGTGGATTGGGTCTATCTATTACAGTGGGAGCACCAACTACAACCCCTCCCTCAAGAGTCGAGTCACCATATCAGTAGACACGTCCAAGAACCAGTTCTCCCTGAAGCTGAGCTCTGTGACCGCTGCGGACACGGCCGTGTATTACTGTGCGACCTCTCAAGAGGGTCGATATTACGATTTTTGGAGTAATTATTATAGTCGTGCTGGCTACTACGCTATGGACGTCTGGGGGCAAGGGACCACGGTCACCGTCTCCTCA	GATATTGTGATGACTCAGTCTCCACTCTCCCTGCCCGTCACCCCTGGAGAGCCGGCCTCCATCTCCTGCAGGTCTAGTCAGAGCCTCCTGCATAGTAATGGATACAACTATTTGGATTGGTACCTGCAGAAGCCAGGGCAGTCTCCACAGCTCCTGATCTATTTGGGTTCTAATCGGGCCTCCGGGGTCCCTGACAGGTTCAGTGGCAGTGGATCAGGCACAGATTTTACACTGAAAATCAGCAGAGTGGAGGCTGAGGATGTTGGGGTTTATTACTGCATGCAAGCTCTACAAACTCCCGCTTTCGGCGGAGGGACCAAGGTGGAGATCAAA
253	IML3695	Pre-vax	ADI-67962	IGHV3-30*03	IGHD4-17*01	IGHJ6*02	IGKV4-1*01	IGKJ4*01	4.1	3	RBD	No						GCGAGAGACTACGGTGACTACGGCGGCCTTGACTCC	ARDYGDYGGLDS	CAGCAATATAATACTCCTCCGCTCACT	QQYNTPPLT	CAGGTGCAGCTGGTGGAGTCTGGGGGAGGCGTGGTCCAGCCTGGGAGGTCCCTGAGACTCTCCTGTGCAGCCTCTGGATTCACCTTCACTAACTATGGCATGCACTGGGTCCGCCAGGCTCCAGGCAAGGGGCTGGAGTGGGTGGCAGTCATCTCATATGATGGAAGTCATAAATATTATGCAGACTCCGTGAAGGGCCGATTCACCATCTCCAGAGACAATTCCAAGAACACACTTTATCTGCAAATGAACAGCCTGAGAACTGAGGAGACGGCTTTATATTACTGTGCGAGAGACTACGGTGACTACGGCGGCCTTGACTCCTGGGGGCAAGGGACCACGGTCACCGTCTCCTCA	GACATCGTGATGACCCAGTCTCCAGACTCCCTGGCTGTGTCTCTGGGCGAGAGGGCCACCATCAACTGCAGGTCCAGCCAGAGTGTTTTATACAGCGCCAACAATAAGAACTACTTAGCTTGGTACCAGCAGAAACCAGGACAGCCTCCTAAGCTACTCATTTACTGGGCATCTATCCGGGAATCCGGGGTCCCTGACCGATTCAGTGGCAGCGGGTCTGGGACAGATTTCACTCTCACCATCACCAGCCTGCAGGCTGAAGATGTGGCAGTGTATTACTGTCAGCAATATAATACTCCTCCGCTCACTTTCGGCGGAGGGACCAAGGTGGAGATCAAA
254	IML3695	Pre-vax	ADI-67963	IGHV5-51*01	IGHD2-21*02	IGHJ3*02	IGLV3-25*03	IGLJ2*01	3.7	1.8	RBD	No						ACGAGGCACGACCATAATGTGGTGGTGACTGCTATTCGAAGGGGGCTTGGGACCGGGGCTTTTGATATC	TRHDHNVVVTAIRRGLGTGAFDI	CAATCAGCAGACAGCAGTGTTACATGGGTA	QSADSSVTWV	GAGGTGCAGCTGGTGCAGTCTGGAGCAGAGGTGAAAAAGCCCGGGGAGTCTCTGAAGATCTCCTGTCAGGGTTCTGGCTACAGCTTTACCAACTACTGGATCGCCTGGGTGCGCCAGATGCCCGGTAAAGGCCTGGAGTGGATGGGGATCATCTATCCTGGTGACTCTAATACCAAATACAGCCCGTCCTTCCAAGGCCAAGTCGCCATCTCAGCCGACAAGTCCATCAGCACCGCCTACCTGCAGTGGAGCAGCCTGAAGGCCTCGGACACCGCCATGTATTACTGTACGAGGCACGACCATAATGTGGTGGTGACTGCTATTCGAAGGGGGCTTGGGACCGGGGCTTTTGATATCTGGGGCCAAGGGACAATGGTCACCGTCTCTTCA	TCCTATGAGCTGACACAGCCACCCTCGGTGTCAGTGTCCCCAGGACAGACGGCCAGGATCACCTGCTCTGGAGATGCATTGCCAAAGGAATATGCTTATTGGTACCAGCAGAAGCCAGGCCAGGCCCCTGTATTGGTGATATATAAAGACAATGAGAGGCCCTCAGGGATCCCTGAGCGATTCTCTGGCTCCAGCTCAGGGACAACAGTCACGTTGACCATCAGTGGAGTCCAGGCAGAAGACGAGGCTGACTATTACTGTCAATCAGCAGACAGCAGTGTTACATGGGTATTCGGCGGAGGGACCAAGCTGACCGTCCTA
255	IML3695	Pre-vax	ADI-67964	IGHV2-26*01	IGHD3-10*01	IGHJ3*02	IGKV1-39*01	IGKJ1*01	4.4	3.2	RBD	No				>1.0		GCACGACTTTATGAAGGTTCGGGGAGGGACTCCAATAACGATGCTTTTGATTTC	ARLYEGSGRDSNNDAFDF	CAACAGAGTTACAGTTCCCGGACT	QQSYSSRT	CAGGTCACCTTGAAGGAGTCTGGTCCTGTGCTGGTGAAACCCACAGAGACCCTCACGCTGACCTGCACCGTCTCCGGGTTCTCACTCAGCAATGTCAGAATGAGTGTGAGTTGGATCCGTCAGCCCCCAGGGAAGGCCCTGGAGTGGCTTGCACACATTTTATCGAATGACGAAAAATTCTACAGCACATCTCTGAAGAGTAGGCTCACCATCTCCAAGGACACCTCCAAAAGCCAGGTGGTCCTCACCGTGACCAACGTGGACCCTGCGGACACAGGCACATATTACTGTGCACGACTTTATGAAGGTTCGGGGAGGGACTCCAATAACGATGCTTTTGATTTCTGGGGCCAAGGGACAATGGTCACCGTCTCTTCA	GACATCCAGATGACCCAGTCTCCATCCTCTCTGTCTACATCTGTAGGAGACAGAGTCACCATCACTTGCCGGGCAAGTCAGAACATTAGTAACTATTTAAATTGGTATCAGCAGAAACCAGGGAAAGCCCCTAAGCTCCTGATCTATGCTGCATCCAGTTTGCAGAGTGGGGTCCCATCAAGGTTCAGTGGCACTGGATCTGGGACAGATTTCACTCTCACCATCAGCAGTCTGCAACCTGAAGATTTTGGAACTTACTACTGTCAACAGAGTTACAGTTCCCGGACTTTCGGCCAAGGGACCAAGGTGGAAATCAAA
256	IML3695	Pre-vax	ADI-67965	IGHV3-30-3*01	IGHD2-15*01	IGHJ4*02	IGKV1-39*01	IGKJ4*01	4.1	1.4	S2	No						GCGAGAGAGTCACTAGGATATTGTAGTGGTGGTAGCTGCTACCACCTTACCCCAGACTTTGACTAC	ARESLGYCSGGSCYHLTPDFDY	CAACAGAGTTACAGTACCCTTGCGCTCACT	QQSYSTLALT	CAGGTGCAGCTGGTGGAGTCTGGGGGAGGCGTGGTCCAGCCTGGGAGGTCCCTGAGACTCTCCTGTGCAGCCTCTGGATTCACCTTCAGTAGATATGCTGTACACTGGGTCCGCCAGGCTCCAGGCAGGGGGCTGGAGTGGGTGGCAGTTATATCAGATGATGGAAACCAGAAATACTATGCAGACTCCCTGAAGGGCCGATTCACCATCTCCAGAGACAATTCCAAGAACACGCTGTATCTGCAAATGAACAGCCTGAGAGCTGAAGATACGGCTGTGTATTACTGTGCGAGAGAGTCACTAGGATATTGTAGTGGTGGTAGCTGCTACCACCTTACCCCAGACTTTGACTACTGGGGCCAAGGAACCCTGGTCACCGTCTCCTCA	GACATCCAGATGACCCAGTCTCCATCCTCCCTGTCTGCATCTATAGGAGACAGAGTCACCATCACTTGCCGGGCAGGTCAGAGCATTAGCAACTATTTAAATTGGTATCAGCAGAAACCAGGGAAAGCCCCTAAGCTCCTGATCTATGCTGCATCCAGTTTGCAAAGTGGGGTCCCGTCAAGGTTCAGTGGCAGTGGATCTGGGACAGATTTCACTCTCACCATCAGCAGTCTGCAACCTGAAGATTTTGCAACTTACTACTGTCAACAGAGTTACAGTACCCTTGCGCTCACTTTCGGCGGAGGGACCAAGGTGGAGATCAAA
257	IML3695	Pre-vax	ADI-67966	IGHV4-4*02	IGHD4-17*01	IGHJ3*02	IGLV2-23*02	IGLJ3*02	5.8	3.4	NTD	No						GCGAGAAGACCCACCCACGGTGACTACGCCCAAGGGGTCTCGAATGCTTTTGATATC	ARRPTHGDYAQGVSNAFDI	TCATATGCAGGTTTTAGCACTTGGGTG	SYAGFSTWV	CAGGTGCAGCTGCAGGAGTCGGGCCCAGGACTGGTGAAACCTTCGGGGACCCTGTCCCTCACCTGCGCTGTCTCTGGTGGCTCCATCAGAAGTGGCATCTGGTGGAGTTGGGTCCGCCAGCCCCCAGGGAAGGGGCTGGAGTGGATTGGGGAAGTGTTTCATAGTGAGAACGCCAACTACAACCCGTCCCTCAAGAGTCGAGTCACCATATCTGTAGACAAGTCCAAGAACGAGTTCTCCCTGAAGGTGATCTCTGTGACCGCCGCGGACATGGCCGTATATTACTGTGCGAGAAGACCCACCCACGGTGACTACGCCCAAGGGGTCTCGAATGCTTTTGATATCTGGGGCCAAGGGACAATGGTCACCGTCTCTTCA	CAGTCTGCCCTGACTCAGCCTGCCTCCGTGTCTGGGTCTCCTGGACAGTCGATCACCATCTCCTGCACTGGAACCAGCAGTGATGTTGGGAGTTATAACCTTGTCTCCTGGTACCAACAACTCCCCGGCAAAGCCCCCAAATTCATGATTTATGAGGTCACTAAGCGGCCCTCAGGAGTTTCTAATCGCTTCTCCGGCTCCAAGTCTGGCAACACGGCCTCCCTGACAATCTCTGGGCTCCAGGCTGAGGACGAGGCTCATTATTACTGCTGCTCATATGCAGGTTTTAGCACTTGGGTGTTCGGCGGAGGGACCAAGCTGACCGTCCTA
258	IML3695	Pre-vax	ADI-67967	IGHV3-30-3*01	IGHD1-26*01	IGHJ4*02	IGKV1-5*04	IGKJ1*01	4.4	3.2	S2	No						GCGAGAGTGCTGGGTGGGAACTACATGAATTCCTTTGACTAC	ARVLGGNYMNSFDY	CAACAATATAATAGTTACCCGACCACT	QQYNSYPTT	CAGGTGCAGCTGGTGGAGTCTGGGGGAGGCGTGGTCCAGCCTGGGAGGTCCCTGAGACTCTCCTGTGCAGCCTCTGGATTCATCTTCAATACCTATTCTATGCACTGGGTCCGCCAGGCTCCAGGCAAGGGGCTGGAGTGGGTGACAGTTATATCATATGATGGAGGCAATACATACTACGCAGACTCCGTGAGGGGCCGCTTCACCGTCTCCAGAGACAATTCCAAGAACACGCTGTATCTGCAAATGAACAGCCTGAGACCTGAAGACACGGCTATGTATTACTGTGCGAGAGTGCTGGGTGGGAACTACATGAATTCCTTTGACTACTGGGGCCAAGGAACCCTGGTCACCGTCTCCTCA	GACATCCAGATGACCCAGTCTCCTTCCACCCTGTCTGCATCTGTAGGAGACAGAGTCACCATCACTTGCCGGGCCAGTCAGAGTATTAGTGACCGGTTGGCCTGGTATCAGCAGAAACCAGGGAAAGCCCCTAAGCTCCTGATCTATAAGGAATCTAGTTTAGAAGGTGGGGTCCCACCAAGATTCAGCGGCAGTGGATCTGCGACAGAATTCACTCTCACCATCAGCAGCCTGCAGCCTGATGATTTTGCAACTTATTACTGCCAACAATATAATAGTTACCCGACCACTTTCGGCCAAGGGACCAAGGTGGAAATCAAA
259	IML3695	Pre-vax	ADI-67968	IGHV1-46*01	IGHD2-2*01	IGHJ4*02	IGKV3-11*01	IGKJ3*01	4.1	1.4	Undefined	No		>1.0				GCGAGAGATCTTGCAGTTGTGCCAGCTGCTCTTGGACTTGACTAC	ARDLAVVPAALGLDY	CAGCAACGTAACAACTGGCCTCCGTTCACT	QQRNNWPPFT	CAGGTGCAGCTGGTGCAGTCTGGGGCTGAGGCGAAGAAGCCTGGGGCCTCAGTGAAGGTTTCCTGCAAGGCATCTGGATACACCTTCACCGACTACTATCTGCACTGGGTGCGACAGGCCCCTGGACAAGGGCTTGAGTGGATGGGCATAATCAACCCTAGTGGTGGTAGCATAGCCTACGCACAGAAGTTCCAGGACAGAGTCACCCTGACCAGGGACACGTCCACGAGCACAGTCTACATGAAGCTGAGCAGCCTGAGATCTGAGGACACGGCCGTATATTACTGTGCGAGAGATCTTGCAGTTGTGCCAGCTGCTCTTGGACTTGACTACTGGGGCCAAGGAACCCTGGTCACCGTCTCCTCA	GAAATTGTGTTGACACAGTCTCCAGCCACCCTGTCTTTGTCTCCAGGGGAAAGAGCCACCCTCTCCTGCAGGGCCAGTCAGAGTGTTAGCACCTACTTAGCCTGGTACCAACAGAAACCTGGCCAGGCTCCCAGGCTCCTCATCTATGATGCATCCAACAGGGCCACTGGCATCCCAGCCAGGTTCAGTGGCAGTGGGTCTGGGACACACTTCACTCTCACCATCAGCAGCCTAGAGCCTGAAGATTTTGCAGTTTATTACTGTCAGCAACGTAACAACTGGCCTCCGTTCACTTTCGGCCCTGGGACCAAAGTGGATATCAAA
260	IML3695	Pre-vax	ADI-67970	IGHV4-4*02	IGHD3-10*01	IGHJ4*02	IGLV6-57*02	IGLJ2*01	4.4	1.7	RBD	No						GCGAGACTCAATTATCGATTCGGGGAACTTGACTAC	ARLNYRFGELDY	CAGTCTTTTGATAACACCAATCGGATT	QSFDNTNRI	CAGGTGCAGCTGCAGGAGTCGGGCCCAGGACTGGTGAAGCCTTCGGGGACCCTGTCCCTCACCTGCACTGTCTCTGGTGGCACCATCAGCAGTGGTAATTGGTGGAGTTGGGTCCGCCAGCCCCCAGGGAAGGGGCTGGAGTGGATTGGGGAAATCTATCATAGTGGGAGCACCAATTACAACCCGTCCCTCAAGAGTCGAGTCACCATATCAGTCGACAAGTCCAATAATCAGTTCTCCTTAAAGCTAAACTTTGTGACCGCCGCGGACACGGCCGTGTATTACTGTGCGAGACTCAATTATCGATTCGGGGAACTTGACTACTGGGGCCAAGGAACCCTGGTCACCGTCTCCTCA	AATTTTATGCTGACTCAGCCCCACTCTGTGTCGGAGTCTCCGGGGAAGACGGTAACCATCTCCTGCACCGGCAGCAGTGGCAGCATTGCCAACAACTATGTGCAGTGGTACCAGCAGCGCCCGGGCAGTGCCCCCAGCACTGTGATCTATGAGGATAACCAAAGACCCTCTGGGGTCCCTGATCGGTTCTCTGGCTCCATCGACAGCTCCTCCAACTCTGCCTCCCTCACCATCTCTGGACTGAAGACTGAGGACGAGGCTGACTACTACTGTCAGTCTTTTGATAACACCAATCGGATTTTCGGCGGAGGGACCAAGCTGACCGTCCTA
261	IML3695	Pre-vax	ADI-67971	IGHV3-9*01	IGHD3-3*01	IGHJ3*02	IGLV1-44*01	IGLJ2*01	4.4	2	RBD	No	0.05993	0.1363	0.3985	>1.0	0.1333	GCAAAACTGGGGGGCGCGAATGCATACGATTTTCGGAGTGGGCCGACTGCTTTTGATATC	AKLGGANAYDFRSGPTAFDI	GCAACATGGGATGACAGCCTGAACGGTGTCGTGGTA	ATWDDSLNGVVV	GAAGTGCAGCTGGTGGAGTCTGGGGGAGGCTTGGTACAGTCAGGCAGGTCCCTGAGACTCTCCTGTGCAGCCTCTGGATTCACCTTTGAGGATTATGCCGTGCACTGGGTCCGGCAAGCTCCAGGGAAGGGCCTGGAGTGGGTCTCAGGTGTTAGTTGGAATAGCGGTACCATAGGCTATGCGGACTCTGTGAAGGGCCGATTCTTCATCTCCAGAGACAACGCCAAGAACTCCCTGTATTTGCAAATGAACGGTCTGAGACCTGAGGACACGGGCTTGTATTACTGTGCAAAACTGGGGGGCGCGAATGCATACGATTTTCGGAGTGGGCCGACTGCTTTTGATATCTGGGGCCAAGGGACAATGGTCACCGTCTCTTCA	CAGTCTGTGCTGACTCAGCCACCCTCAGCGTCTGGGACCCCCGGGCAGAGGGTCACCATCTCTTGTTCTGGAAGCACCTCCAACATCGGAAGTAATACTGCAAACTGGTACCAACAGCTCCCAGGAACGGCCCCCAAACTCCTCATCTATAGTGATAATCAGCGGCCCTCAGGGGTCCCTGACCGATTCTCTGGCTCCAAGTCTGGCACCTCAGCCTCCCTGGCCATCAGTGGGCTCCAGTCTGAGGATGAGGCTGATTATTACTGTGCAACATGGGATGACAGCCTGAACGGTGTCGTGGTATTCGGCGGAGGGACCAAGCTGACCGTCCTA
262	IML3695	Pre-vax	ADI-67974	IGHV4-4*02	IGHD2-21*02	IGHJ4*02	IGKV3-11*01	IGKJ1*01	3.7	1.7	NTD	No						GCGAGAGGGCCTATTCATAATAGGATGTTTGACTCC	ARGPIHNRMFDS	CAGCACCGTAACAACTGGCCTCCGGAGATCACT	QHRNNWPPEIT	CAGGTGCAGCTGCAGGAGTCGGGCCCAGGACTGGTGAAGCCTTCGGGGACCCTGTCCCTCACCTGCGCTGTCTCTGGTGGCTCCATCAACAGTATTAAGTTTTGGAGTTGGGTCCGCCAGCCCCCAGGAAAGGGGCTGGAGTGGATTGGGGAAATCTATCATAGTGGGAGCACCAACTACAAGCCGTCCCTCAAGAGTCGAGTCACCATGTCAGTAGACAAGTCCAAGAACCAGTTCTCCCTGAACCTGAACTCTGTGACCGCCGCGGACACGGCCGTATATTACTGTGCGAGAGGGCCTATTCATAATAGGATGTTTGACTCCTGGGGCCAAGGAACCCTGGTCACCGTCTCCTCA	GAAATTGTGTTGACACAGTCTCCAGCCACCCTGTCTTTGTCTCCAGGGGAAAGAGCCATCCTCTCCTGCAGGGCCAGTCAGAGTGTTAGCAACTACTTAGCCTGGTACCAACAGAAACCTGGCCAGGCTCCCAGGCTCCTCATCTATGATGCATCCAACAGGGCCACTGGCATCCCAGACAGGTTCAGTGGCAGTGGGTCTGGGACAGACTTCACTCTCACCATCAGCAGCCTAGAGCCTGAAGATTTTGCAGTTTATTACTGTCAGCACCGTAACAACTGGCCTCCGGAGATCACTTTCGGCCAAGGGACCAAGGTGGAAATCAAA
263	IML3695	Pre-vax	ADI-67975	IGHV3-30*18	IGHD2-21*02	IGHJ3*02	IGKV1-17*03	IGKJ5*01	1.7	0.4	Undefined	No						ACCAAAGATATTCCGGCATATTGTGGTGGTGACTGCTATTCTGGAGCTTTTGACTAC	TKDIPAYCGGDCYSGAFDY	CTACAGCATAATAGTTACCCGATCACC	LQHNSYPIT	CAGGTGCAGCTGGTGGAGTCTGGGGGAGGCGTGGTCCAGCCTGGGAGGTCCCTGAGACTCTCCTGTGCAGCCTCTGGATTCATCTTCAGTAGCTATGGCATGCACTGGGTCCGCCAGGCTCCAGGCAAGGGGCTGGAGTGGGTGGCAGTTATATCATATGGTGGAAGTAATAAATACTATGCAGACTCCGTGAAGGGCCGATTCACCATCTCCAGAGACAATTCCAAGAACACGCTGTATCTGCAAATGAACAGCCTGAGAGCTGAGGACACGGCTGTGTATTATTGTACCAAAGATATTCCGGCATATTGTGGTGGTGACTGCTATTCTGGAGCTTTTGACTACTGGGGCCAAGGGACAATGGTCACCGTCTCTTCA	GACATCCAGATGACCCAGTCTCCATCTGCCATGTCTGCATCTGTAGGAGACAGAGTCACCATCACTTGTCGGGCGAGTCAGGGCATTAGCAATTATTTAGCCTGGTTTCAGCAGAAACCAGGGAAAGTCCCTAAGCGCCTGATCTCTGCTGCATCCAGTTTGCAAAGTGGGGTCCCATCAAGGTTCAGCGGCAGTGGATCTGGGACAGAATTCACTCTCACAATCAGCAGCCTGCAGCCTGAAGATTTTGCAACTTATTACTGTCTACAGCATAATAGTTACCCGATCACCTTCGGCCAAGGGACACGACTGGAGATTAAA
264	IML3695	Pre-vax	ADI-67976	IGHV3-15*01	IGHD6-6*01	IGHJ6*02	IGLV3-25*03	IGLJ3*02	6	2.6	Undefined	No						ACCACAGATCGAGGGGCAGCTCGCCCCATCATTTACTTCTCGTATTACGGTATGGACGTC	TTDRGAARPIIYFSYYGMDV	CAATCAGCAGACAATTTTGGTGGTGTCTTG	QSADNFGGVL	GAGGTGCAGCTGGTGGAGTCTGGGGGAGGCTCGGTAAAGCCGGGGGGGTCCGTTAGACTCTCCTGTGTAGCCTCTGGATTCACTTTCACTAACGCCTGGATGAACTGGGTCCGCCAGGCTCCAGGGAAGGGCCTGGAGTGGGTTGGCCGTGTGAAAAGTAAAAGTGATGGTGGGACAATAGACTACGCTGCACCCGTGAAAGGCAGATTCACCGTCTCAAGAGATGATTCCAAAAACACGCTGTATCTGGAGATGAACAGCCTGAAAACCGAGGACACAGCCGTATATTACTGCACCACAGATCGAGGGGCAGCTCGCCCCATCATTTACTTCTCGTATTACGGTATGGACGTCTGGGGGCAAGGGACCACGGTCACCGTCTCCTCA	TCCTATGAGCTGACACAGCCACCCTCGGTGTCAGTGTCCCCAAGACAGACGGCCAGGATCACCTGCTCTGGAGATGCATTGCCAAAGCAATATGCTTATTGGTATCAGCAGAAGCCAGGCCAGGCCCCTGTCATGGTGATATATAAAGACACTGAGAGGCCCTCAGGGATCCCTGAGCGATTCTCTGGCTCCAGCTCAGGGACAACAGTCACGTTGACCATCAGTGGGGTCCAGGCAGAAGACGAGGCTGACTATTATTGTCAATCAGCAGACAATTTTGGTGGTGTCTTGTTCGGCGGAGGGACCAAGCTGACCGTCCTA
265	IML3695	Pre-vax	ADI-67977	IGHV3-9*01	IGHD1-26*01	IGHJ6*02	IGLV3-21*04	IGLJ2*01	2	2.1	RBD	No	0.02972	0.0759	0.2904	0.4427	0.02833	GTAAAAGATATGTCAGTGGGTGACAGGTCGGTTGAGTACTACGGTATGGACGTC	VKDMSVGDRSVEYYGMDV	CAGGTGTGGGATAGTAGTAGTGAGAATGTGGTA	QVWDSSSENVV	GAAGTGCAGCTGGTGGAGTCTGGGGGAGGCTTGGTACAGCCTGGCAGGTCCCTGAGACTCTCCTGTGCAGCCTCTGGATTCACTTTTGATGATTATGCCATGCACTGGGTCCGGCAAGCTCCAGGGAAGGGCCTGGAGTGGGTCTCAGGTGTTACTTGGAATAGTGGTACCATAGGCTATGCGGACTCTGTGAAGGGCCGATTCATCATCTCCAGAGACAACGCCAAGAACTCCCTGTATCTGCAAATGAACAGTCTGAGAGCTGAGGACACGGCCTTGTATTACTGTGTAAAAGATATGTCAGTGGGTGACAGGTCGGTTGAGTACTACGGTATGGACGTCTGGGGGCAAGGGACCACGGTCACCGTCTCCTCA	TCCTATGTGCTGACTCAGCCACCCTCAGTGTCAGTGGCCCCAGGAAAGACGGCCAGGATTACCTGTGGGGGAAACAACATTGGAAGTAAAAGTGTACACTGGTACCAGCGGAAGCCAGGCCAGGCCCCTGTGCTAGTCATCTATTATGATAGCGACCGGCCCTCAGGAATCCCTGGGCGATTCTCTGGCTCCAACTCTGGGAACACGGCCACCCTGACCATCAGCAGGGTCGAAGCCGGGGATGAGGCCGACTATTATTGTCAGGTGTGGGATAGTAGTAGTGAGAATGTGGTATTCGGCGGAGGGACCAAGCTGACCGTCCTA
266	IML3695	Pre-vax	ADI-67978	IGHV5-51*01	IGHD1-26*01	IGHJ5*02	IGLV1-44*01	IGLJ2*01	2.7	2.1	RBD	No						GCGAGACGCTCTGGGAGCTACAACGGGTGGTTCGACCCC	ARRSGSYNGWFDP	GCAGCATGGGATGACAGCCTGAATGCCGTGGTA	AAWDDSLNAVV	GAGGTGCAGCTGGTGCAGTCTGGAGCAGAGGTGAAAAAGCCCGGGGAGTCTCTGAAGATCTCCTGTAAGGGTTCTGGATACAGCTTTATCAGCTACTGGATCGGCTGGGTGCGCCAGATGCCCGGGAAAGGCCTGGAGTGGATGGGGATCATCTATCCTGGTGACTCTGATACCACATACAGCCCGTCCATTCAAGGCCAGGTCACCATGTCAGTCGACAGGTCCATCAGCACCGCCTACCTGCAGTGGAGCAGCCTGCAGGCCTCGGACACCGCCATGTATTACTGTGCGAGACGCTCTGGGAGCTACAACGGGTGGTTCGACCCCTGGGGCCAGGGAACCCTGGTCACCGTCTCCTCA	CAGTCTGTGCTGACTCAGCCACCGTCAGCGTCTGGGACCCCCGGGCAGAGGGTCACCATCTCTTGCTCTGGAAGCAGCTCCAACATCGGAAGTAATACTGTAAACTGGTACCAGCAGCTCCCAGGAACGGCCCCCAAACTCCTCATCTATAATAATAATCAGCGGCCCTCAGGGGTCCCTGACCGATTCTCTGGCTCCAAGTCTGCCACCTCAGCCTCCCTGGCCATCACTGGACTCCAGTCTGAGGATGAGGCTGATTATTACTGTGCAGCATGGGATGACAGCCTGAATGCCGTGGTATTCGGCGGAGGGACCAAGCTGACCGTCCTA
267	IML3695	Pre-vax	ADI-67979	IGHV3-33*01	IGHD6-13*01	IGHJ4*02	IGKV1-5*04	IGKJ1*01	6.4	3.9	S2	No						GCGAGAGGATCAGCAGCTGGAGACTAC	ARGSAAGDY	CAACAGTATGTTAGTGCCCCGTACACT	QQYVSAPYT	CAGGTGCAGCTGGTGGAGTCTGGGGGAGGCGTGGTCCAGCCTGGGAGGTCCCTGAGACTCTCCTGTGCAGCGTCTGGATTCAACTTCAGTGACTATGGCATGCACTGGGTCCGCCAGGCTTCAGGCAAGGGACTGGAGTGGGTGGCAAGTATCTGGCATGATGGAGCTAAGAAGTACTATGCAGAGTCCTTGAAGGGCCGATTCACCATCTCCAGAGACAATTCCAAGAACACGCTGTATCTGCAAATGAACAGCCTCAGAGCCGACGACACGGCTGTATTTTACTGTGCGAGAGGATCAGCAGCTGGAGACTACTGGGGCCAAGGAACCCTGGTCACCGTCTCCTCA	GACATCCAGATGACCCAGTCTCCTTCCACCCTGTCTGCGTCTGTCGGAGACAGAGTCACCATCACTTGCCGGGCCAGTCAGAGTATTAGTAACTGGTTGGCCTGGTATCAGCAGAAACCAGGGAAACCCCCTAAGCTCCTGATCTATAGGACATCTAGTAGTTTAGAAAGTGGGGTCCCATCAAGGTTCAGCGGCAGTGGATCTGGGACAGAATTCACTCTCACCATCAGCAGCCTGCAGCCTGATGATTTTGCAACTTATTACTGCCAACAGTATGTTAGTGCCCCGTACACTTTCGGCCAAGGGACCAAGGTGGAAATCAAA
268	IML3695	Pre-vax	ADI-67981	IGHV1-69*01	IGHD3-22*01	IGHJ3*02	IGKV1-39*01	IGKJ1*01	5.7	3.2	RBD	No	0.005091	0.0094	>1.0	0.0117	0.04438	GCGAGAGATGGTCGCCATAACTATGATAGCACTGGTTATTACCACAATGCTTTTGATATC	ARDGRHNYDSTGYYHNAFDI	CAACAGAGTTACAGTTCCCGGACT	QQSYSSRT	CAGGTGCAGCTGGTGCAGTCTGGGGCTGAGGTGAAGAAGCCTGGGTCCTCGGTGAAAGTCTCCTGCAAGGCTTCTGGAGACACCTTCAGGATCTATGCTATCAACTGGGTGCGACAGGCCCCTGGACAGGGACTTGAGTGGATGGGAGGGATCATCCCTATCTCTGGTGCACCATTTTACGCACAGAGGTTCCAGGGCAGAGTCACGATTACCGCGGACGAATCCACGAGCACAGCCTACATGGAGCTGAGCAGCCTGAGATTTGAGGACACGGCCGTGTTTTACTGCGCGAGAGATGGTCGCCATAACTATGATAGCACTGGTTATTACCACAATGCTTTTGATATCTGGGGCCAAGGGACAATGGTCACCGTCTCTTCA	GACATCCAGATGACCCAGTCTCCATCCTCTCTGTCTACATCTGTAGGAGACAGAGTCACCATCACTTGCCGGGCAAGTCAGAACATTAGTAACTATTTAAATTGGTATCAGCAGAAACCAGGGAAAGCCCCTAAGCTCCTGATCTATGCTGCATCCAGTTTGCAGAGTGGGGTCCCATCAAGGTTCAGTGGCACTGGATCTGGGACAGATTTCACTCTCACCATCAGCAGTCTGCAACCTGAAGATTTTGGAACTTACTACTGTCAACAGAGTTACAGTTCCCGGACTTTCGGCCAAGGGACCAAGGTGGAAATCAAA
269	IML3695	Pre-vax	ADI-67982	IGHV3-30-3*01	IGHD2-2*01	IGHJ3*02	IGKV1-5*03	IGKJ1*01	4.4	3.9	S2	No						GCGAGAGCTCAGAGGGGGGGCTATGTGAGTGCTTTTGATATC	ARAQRGGYVSAFDI	CAACAGTATAATAGTTATTGGACG	QQYNSYWT	CAGGTGCAGCTGGTGGAGTCTGGGGGAGGCGTGGTCCAGTCTGGGAGGTCCCTGAGACTCTCCTGTGCAGCCTCTGGATTCACCTTCAGTACCTATGCTATACACTGGGTCCGCCAGGCTCCAGGCAAGGGACTGGAGTGGGTGGTAGTTATATCGTATGATGGAGACAATAAATACTACGCAGACTCCGTGAAGGGCCGATTCACCATCTCTAGAGACAATTCCAAGAACACACTGTATCTGCAAATGAACAGCCTGAGACCTGACGACACGGCTGTCTATTACTGTGCGAGAGCTCAGAGGGGGGGCTATGTGAGTGCTTTTGATATCTGGGGCCAAGGGACAATGGTCACCGTCTCTTCA	GACATCCAGATGACCCAGTCTCCTTCCACCCTGTCTGCATCTGTAGGAGACAGAGTCACCATCACTTGCCGGGCCAGTCAGACTATTAGTGGCTCGTTGGCCTGGTATCAGCAGAAACCAGGGACAGCCCCTAAGCTCCTGATCTATCAGGCGTCTAATTTAGAAAGTGGGGTCCCATCCAAGTTCAGCGGCAGTGGATCTGGGACAGAATTCACTCTCACTATCAACAGCCTGCAGCCTGATGATGTTGCAACTTATTACTGCCAACAGTATAATAGTTATTGGACGTTCGGCCAAGGGACCAAGGTGGAAATCAAA
270	IML3695	Pre-vax	ADI-67983	IGHV3-9*01	IGHD6-13*01	IGHJ4*02	IGKV1-27*01	IGKJ4*01	5	3.5	RBD	No	0.003104	0.0031	>1.0	0.0049		GCAAAAGGGAAATGGCCTAGCAGCCCATCGTTCCTTACAGATTAC	AKGKWPSSPSFLTDY	CAAAAGTATAACAGTGTCCCTCTCACT	QKYNSVPLT	GAAGTGCAGCTGGTGGAGTCTGGGGGAGGCTTGGTACAGCCTGGCGGGTCCCTGAGACTCTCATGTGCAGCCTCTGGATTCACCTTTGATGATTATGCCATGCACTGGGTCCGGCAAGCTCCAGGGAAGGGCCTGGAGTGGGTCTCAGGTATTAGTTGGAGTAGTGATAGTGGTAGTATTGTCTATGCGGACTCTGTGGAGGGCCGATTCACCATCTCCAGAGACAACGCCAAGAACTCCCTGTATCTTCAAATGAACAGTCTGAGAACTGAGGACACGGCCTTATATTACTGTGCAAAAGGGAAATGGCCTAGCAGCCCATCGTTCCTTACAGATTACTGGGGCCAAGGAACCCTGGTCACCGTCTCCTCA	GACATCCAGATGACCCAGTCTCCATCCTCCCTGTCTGCATCTGTAGGAGACAGAGTCACCATCACTTGCCGGGCGAGTCAGGGCATTAGGAATTATTTAGCCTGGTATCAGCAGAACCCAGGGAAAGTTCCTAAGCTCTTGATCTATGCTGCATCCACTTTGCAACCAGGGGTCCCATCTCGATTTAGTGGCAGTGGATCTGGGACAGATTACACTCTCACCATCAGCAGCCTGCGGCCTGAAGATGTTGGAACTTATTACTGTCAAAAGTATAACAGTGTCCCTCTCACTTTCGGCGGAGGGACCAAGGTGGAGATCAAA
271	IML3695	Pre-vax	ADI-67989	IGHV4-31*03	IGHD3-3*01	IGHJ6*02	IGLV3-25*03	IGLJ3*02	2.3	2.8	S2	No						GCGAGAGGCTTTTTGGAGTGGTCGTTAGGGACCACGTACCGATATTACCACGGTATGGACGTC	ARGFLEWSLGTTYRYYHGMDV	CAATCAGCAGACAGCAGTAGTACTTCTTGGGTG	QSADSSSTSWV	CAGGTGCAGCTGCAGGAGTCGGGCCCAGGACTGGTGAAGCCTTCACAGACCCTGTCCCTCACCTGCACTGTCTCTGGTGGCTCCATCAGCAGTGGTGGTTACTACTGGAGCTGGATCCGCCAGCACCCAGGGAAGGGCCTGGAGTGGATTGGGTACATCTATTACAGTGGGAACACCTACTACAACCCGTCCGTCAAGAGTCGAGTTACCATTTCAGTAGACACGTCTGAGAACCAGTTCTCCCTGAACCTGAGCTCTGTGACTGCCGCGGACACGGCCGTGTATTTTTGTGCGAGAGGCTTTTTGGAGTGGTCGTTAGGGACCACGTACCGATATTACCACGGTATGGACGTCTGGGGGCAAGGGACCACGGTCACCGTCTCCTCA	TCCTATGAGCTGACACAGCCACCCTCGGTGTCAGTGTCCCCAGGACAGACGGCCAGGATCACCTGCTCTGGAGATGCATTGCCAAGCCAATATGCTTCTTGGTACCAGCAGAAGCCAGGCCAGGCCCCTGTGTTGATGATATATAAAGACACTGAGAGGCCCTCAGGGATCCCTGAGCGATTCTCTGGCTCCAACTCAGGGACAACAGTCACGTTGACCATCAGTGGAGTCCAGGCAGAAGACGAGGCTGACTATTACTGTCAATCAGCAGACAGCAGTAGTACTTCTTGGGTGTTCGGCGGAGGGACCAAGCTGACCGTCCTA
272	IML3695	Pre-vax	ADI-67990	IGHV1-46*03	IGHD3-16*02	IGHJ4*02	IGKV2-28*01	IGKJ4*01	4.1	2	Undefined	No						GCTAGGCTTGAGTCTTTTGATTACACTTGGGGTATTTATCGCCTTGACAAG	ARLESFDYTWGIYRLDK	ATGCAAGCTCTACAAACTCCGCTCACT	MQALQTPLT	CAGGTGCAGCTGGTGCAGTCTGGGGCTGAGGTGAAGAAGCCTGGGGCCTCCGTGAAGATTTCCTGCAAGGCATCTGGATACATCTCCACCAATTACTATATGCATTGGGTGCGACAGGCCCCTGGACAAGGGCTTGAGTGGATGGGAATAATCAACCCTAGTGGTGGAAGGACAAGCTACGCACAGAAGTTCCAGGGCAGAGTCACCATGACCAGGGACACGTCCACGAGCACAGTCTACGTGGAGCTGAGCAGCCTGAAATCTGAGGACACGGCCATGTATTACTGTGCTAGGCTTGAGTCTTTTGATTACACTTGGGGTATTTATCGCCTTGACAAGTGGGGCCAAGGAACCCTGGTCACCGTCTCCTCA	GATATTGTGATGACTCAGTCTCCACTGTCCCTGCCCGTCACCCCTGGAGAGCCGGCCTCCATCTCCTGCAGGTCTAGTCAGAGCCTCCTGAAAAGTGATGGATTCAACTATTTGGATTGGTACCTGCAGAAGCCAGGGCAGTCTCCACAGCTCCTGATCTATTTGGCTTCTAATCGGGCCTCCGGGGTCCCTGACAGGTTCAGTGGCAGTGGATCAGGCACAGATTTTACACTGAAAATCAGCAGAGTGGAGGCTGAGGATGTTGGGGTTTATTACTGCATGCAAGCTCTACAAACTCCGCTCACTTTCGGCGGAGGGACCAAGGTGGAGATCAAA
273	IML3695	Pre-vax	ADI-67992	IGHV4-4*02	IGHD3-10*01	IGHJ4*02	IGLV6-57*02	IGLJ2*01	4.4	1.7	S2	No		>1.0	>1.0	>1.0		GCGAGACTCAATTATCGATTCGGGGAACTTGACTAC	ARLNYRFGELDY	CAGTCTTTTGATAACACCAATCGGATT	QSFDNTNRI	CAGGTGCAGCTGCAGGAGTCGGGCCCAGGACTGGTGAAGCCTTCGGGGACCCTGTCCCTCACCTGCACTGTCTCTGGTGGCACCATCAGCAGTGGTAATTGGTGGAGTTGGGTCCGCCAGCCCCCAGGGAAGGGGCTGGAGTGGATTGGGGAAATCTATCATAGTGGGAGCACCAATTACAACCCGTCCCTCAAGAGTCGAGTCACCATATCAGTCGACAAGTCCAATAATCAGTTCTCCTTAAAGCTAAACTTTGTGACCGCCGCGGACACGGCCGTGTATTACTGTGCGAGACTCAATTATCGATTCGGGGAACTTGACTACTGGGGCCAAGGAACCCTGGTCACCGTCTCCTCA	AATTTTATGCTGACTCAGCCCCACTCTGTGTCGGAGTCTCCGGGGAAGACGGTAACCATCTCCTGCACCGGCAGCAGTGGCAGCATTGCCAACAACTATGTGCAGTGGTACCAGCAGCGCCCGGGCAGTGCCCCCAGCACTGTGATCTATGAGGATAACCAAAGACCCTCTGGGGTCCCTGATCGGTTCTCTGGCTCCATCGACAGCTCCTCCAACTCTGCCTCCCTCACCATCTCTGGACTGAAGACTGAGGACGAGGCTGACTACTACTGTCAGTCTTTTGATAACACCAATCGGATTTTCGGCGGAGGGACCAAGCTGACCGTCCTA
274	IML3695	Pre-vax	ADI-67993	IGHV4-39*01	IGHD6-13*01	IGHJ4*02	IGKV2-28*01	IGKJ1*01	3	0	Undefined	No			>1.0	>1.0		GCGAGACTGGGGCAGCAGCTGGTACTGGTTCGCTTTGACTCC	ARLGQQLVLVRFDS	ATGCAAGCTCTACAAATCCCGTACACT	MQALQIPYT	CAGCTGCAGCTGCAGGAGTCGGGCCCAGGACTGGTGAAGCCTTCGGAGACCCTGTCCCTCACCTGCACTGTCTCTGGTGGCTCCATCAGCAGTAGTTCTTACTACTGGGGCTGGATCCGCCAGCCCCCAGGGAAGGGACTGGAGTGGATTGGGAATATCTATTATACTGGGAGAACCTACTACAACCCGTCCCTCAAGAGTCGAGTCACCATATCCCTAGACACGTCCAAGAACCAGTTCTCCCTGAAACTGAACTCTGTGACCGCCGCAGACACGGCTGTGTATTACTGTGCGAGACTGGGGCAGCAGCTGGTACTGGTTCGCTTTGACTCCTGGGGCCAAGGAACCCTGGTCACCGTCTCCTCA	GATATTGTGATGACTCAGTCTCCACTCTCCCTGCCCGTCACCCCTGGAGAGCCGGCCTCCATCTCCTGCAGGTCTAGTCAGAGCCTCCTGCATAGTAATGGATACAACTATTTGGATTGGTACCTGCAGAAGCCAGGGCAGTCTCCACAGCTCCTGATCTATTTGGGTTCTAATCGGGCCTCCGGGGTCCCTGACAGGTTCAGTGGCAGTGGATCAGGCACAGATTTTACACTGAAAATCAGCAGAGTGGAGGCTGAGGATGTTGGGGTTTATTACTGCATGCAAGCTCTACAAATCCCGTACACTTTCGGCCAAGGGACCAAGGTGGAAATCAAA
275	IML3695	Pre-vax	ADI-67994	IGHV3-23*01	IGHD5-18*01	IGHJ6*02	IGLV2-14*03	IGLJ2*01	3.8	2	RBD	No	0.06249	0.1967	0.3379	0.227	0.3084	GCGAGGGACCTCGGTGGATATAGCTATGGCTTGAACTTCTTCTATGCTATGGACGTC	ARDLGGYSYGLNFFYAMDV	AGCTCATACACAAGCAGCAGCACTTTTGTGTTA	SSYTSSSTFVL	GAGGTGCAGCTGGTGGAGTCTGGGGGAGGCTTGGTACAGCCTGGGGGGTCCCTGAGGCTCTCCTGTGCAGCCTCTGGATTCACCTTTAGAAACTATGCCATGAATTGGGTCCGCCAGGCTCCAGGGAAGGGGCTGGAGTGGGTCTCAGTTCTTAGTGGTGGTGATGGTAGCACATACTACGCAGACTCCGTGAAGGGCCGGTTCACCATCTCCAGAGACAATTCCAAGAATACGCTGTATCTGCAAATGAACAGCCTGAGAGCCGAGGACACGGCCGTATATTACTGTGCGAGGGACCTCGGTGGATATAGCTATGGCTTGAACTTCTTCTATGCTATGGACGTCTGGGGGCAAGGGACCACGGTCACCGTCTCCTCA	CAGTCTGCCCTGACTCAGCCTGCCTCCGTGTCTGGGTCTCCTGGACAGTCGATCACCATCTCCTGCACTGGAACCAGCAGTGACGTTGGTGCTTTTAACTATGTCTCCTGGTACCAACAACACCCAGGCAAAGCCCCCAAACTCATGATTTATGATGTCAATAATCGGCCCTCAGGGGTTTCTAATCGCTTCTCTGGCTCCAAGTCTGGCAACGCGGCCTCCCTGACCATCTCTGGGCTCCAGGCTGAGGACGAGGCTGATTACTACTGCAGCTCATACACAAGCAGCAGCACTTTTGTGTTATTCGGCGGAGGGACCAAGCTGACCGTCCTA
276	IML3695	Pre-vax	ADI-67995	IGHV4-31*03	IGHD2-8*01	IGHJ4*02	IGKV3-20*01	IGKJ1*01	3.4	2.8	Undefined	Yes						GCGAGAAGGCCCGGATATTGTCCTAATGGTGTATGTTTACCTTTTGACTCC	ARRPGYCPNGVCLPFDS	CACCAGTATGGTAGCGCACCGTGGACG	HQYGSAPWT	CAGGTGCAGCTGCAGGAGTCGGGCCCAGGACTGGTGAAGCCTTCACAGACCCTGTCCCTCACCTGCACTGTCTCTGGTGGCTCCATCAGCAGTGGAGGTTACTATTGGAGCTGGATCCGCCAGCACCCAGGGAAGGGCCTGGAGTGGATTGGATACTTCCATTACAGTGGGAGCACCTACTACAACCCGTCCCTCAAGAGTCGACTTACCATCTCAGTCGACACGTCTAAGAACCAGTTCTCCCTGAAGCTGACCTCTGTGACTGCCGCGGACACGGCCGTATATTACTGTGCGAGAAGGCCCGGATATTGTCCTAATGGTGTATGTTTACCTTTTGACTCCTGGGGCCAAGGAACCCTGGTCACCGTCTCCTCA	GAAATTGTGTTGACGCAGTCTCCAGGCACCCTGTCTTTGTCTCCAGGGGAAAGAGCCACCCTCTCCTGCAGGGCCAGTCAGAGTGTTAGCAGCACCTACTTAGCCTGGTACCAGCAGAAACCTGGCCAAGTTCCCAGGCTCCTCATGTTTGCTGCATCCAGCAGGGCCACTGGCATCCCAGACAGGTTCAGTGGCAGTGGGTCTGGGACAGACTTCACTCTCACCATCAGCAGACTGGAGCCTGAAGATTTTGCAGTGTATTACTGTCACCAGTATGGTAGCGCACCGTGGACGTTCGGCCAAGGGACCAAGGTGGAAATCAAA
277	IML3695	Pre-vax	ADI-67997	IGHV4-39*01	IGHD2-2*01	IGHJ5*02	IGLV2-14*03	IGLJ3*02	3.7	1	S2	No						GCGGGGCGAGGCGTTGCACTTGAACCAGCTGCTATGAGGGGGTTTTGGTTCGACCCC	AGRGVALEPAAMRGFWFDP	AGCTCATATACAAGCATCAGCACTTGGGTG	SSYTSISTWV	CAGCTGCAGCTGCAGGAGTCGGGCCCAGGACTGGTGAAGCCTTCGGAGACCCTGTCCATCACCTGCCTTGTCTCTGGTGGTTCCATCAGCAGTAGTAGTTACTACTGGGGCTGGATCCGCCAGCCCCCAGGGAAGGGGCTGGAGTGGATTGGGAGTATCTATTATAGTGGGAGTACCTATTACAACCCGTCCCTCAAGAGTCGAGTCACCATTTCCGTCGACACGTCCAAGAACCAGTTCTCCCTGAAGCTGACGTCTGTGACCGCCGCAGACACGGCTGTGTATTTCTGTGCGGGGCGAGGCGTTGCACTTGAACCAGCTGCTATGAGGGGGTTTTGGTTCGACCCCTGGGGCCAGGGAACCCTGGTCACCGTCTCCTCA	CAGTCTGCCCTGACTCAGCCTGCCTCCGTGTCTGGGTCTCCTGGACAGTCGATCACCATCTCCTGCACTGGAACCAGCAGTGACGTTGGTGGTTATAACTATGTCTCCTGGTACCAACAACACCCAGGCAAAGCCCCCAAACTCATGATTTATGATGTCAATAATCGGCCCTCAGGGGTTTCTAATCGCTTCTCTGGCTCCAAGTCTGGCAACACGGCCTCCCTGACCATCTCTGGGCTCCAGGCTGAGGACGAGGCTGATTATTATTGCAGCTCATATACAAGCATCAGCACTTGGGTGTTCGGCGGAGGGACCAAGCTGACCGTCCTA
278	IML3695	Pre-vax	ADI-67998	IGHV3-30*18	IGHD1-26*01	IGHJ4*02	IGKV1-39*01	IGKJ4*01	4.1	1.4	RBD	No				>1.0		GCGAAAGATACCCGTCAAGACTGGGAGCCGATACTTGAGTAC	AKDTRQDWEPILEY	CAACAGAGTTACACTACCCTGACGCTCACT	QQSYTTLTLT	CAGGTGCAGCTGGTGGAGTCTGGGGGAGGCGTGGTCCAGCCTGGGAGGTCCCTGAGACTCTCCTGTGCAGCCTCTGGATTCACCTTCAGTGACTATGCCATGCACTGGGTCCGCCAGGCTCCAGGCAAGGGGCTGGAGTGGGTGGCAGTTATCTCAAATGATGGAAGTGGTAAATTCTATGCAGACTCCGTGAAGGGCCAATTCACCATCTCCAGAGACAATTCCCAGAACACGCTGTTTCTGCAAATGAACAGCCTGAGAGCTGACGACACGGCTGTGTATTACTGTGCGAAAGATACCCGTCAAGACTGGGAGCCGATACTTGAGTACTGGGGCCAAGGAACCCTGGTCACCGTCTCCTCA	GACATCCAGATGACCCAGTCTCCATCCTCCCTGTCTGCATCTGTAGGAGACAGAGTCACCATCACTTGCCGGGCAAGTCAGAGCATTAGCAGATATTTAAATTGGTATCAGCAGAAACCAGGGAAAGCCCCTAAGCTCCTGATCTATGCTGCATCCACTTTGCAAAGTGGGGTCCCATCAAGGTTCACTGGCAGTGGATCTGGGACAGATTTCACTCTCACCATCAGCAGTCTGCAACCTGAAGATTTTGCAACTTACTACTGTCAACAGAGTTACACTACCCTGACGCTCACTTTCGGCGGAGGGACCAAGGTGGAGATCAAA
279	IML3695	Pre-vax	ADI-67999	IGHV1-69*01	IGHD5-12*01	IGHJ4*02	IGLV1-40*01	IGLJ1*01	5.1	1.7	RBD	No	0.2013	0.5019	0.6414	>1.0	0.1381	GCGAGAGAGCGTGGATACAGTGGTTATGGAGCCAGCCTGTATTTTGACTAC	ARERGYSGYGASLYFDY	CAGTCCTATGACAGCAGCCTGAGTGGTGCAGTG	QSYDSSLSGAV	CAGGTGCAGCTGGTGCAGTCTGGGGCTGAGGTGAAGAAGCCTGGGTCCTCGGTGAAGGTCCCCTGCAAGGCTTCTGGAGGCACCTTCAGCAACTATGGTATCAGCTGGGTGCGACAGTCCCCTGGACAAGGGCCTGAGTGGCTGGGAGGGATCCTCCCTATCTTGGGTACAGTAAACTACGCACAGAAGTTCCAGGGTAGAGTCACGATTACCGCGGACGAATCCAGGACTACAGCCTACATGGAACTGAGCAGCCTGAGATCTGAGGACACGGCCGTCTATTACTGTGCGAGAGAGCGTGGATACAGTGGTTATGGAGCCAGCCTGTATTTTGACTACTGGGGCCAAGGAACCCTGGTCACCGTCTCCTCA	CAGTCTGTGCTGACGCAGCCGCCCTCAGTGTCTGGGGCCCCAGGGCAGAGGGTCACCATCTCCTGCACTGGGAGCAACTCCAACATCGGGGCAGGTTATGATGTACACTGGTACCAGCGGCTTCCAGGAACAGCCCCCAAACTCCTCATCTATGGTAACAACAATCGGCCCTCAGGGGTCCCTGACCGCTTCTCTGGCTCCAAGTCTGACACCTCAGCCTCCCTGGCCATCACTGGGCTCCAGGCTGAGGATGAGGCTGATTATTACTGCCAGTCCTATGACAGCAGCCTGAGTGGTGCAGTGTTCGGAACTGGGACCAAGGTCACCGTCCTA
280	IML3695	Pre-vax	ADI-68000	IGHV4-31*03	IGHD3-3*01	IGHJ5*02	IGLV1-40*01	IGLJ1*01	1.7	1	NTD	No						GCGAGAGATTTAGGACTGCACGATTTTTGGAGTGGCGGCAACTGGTTCGACCCC	ARDLGLHDFWSGGNWFDP	CAGTCCTATGACAGCAGCCTGAGTGGTTCGAGGGTG	QSYDSSLSGSRV	CAGGTGCAGCTGCAGGAGTCGGGCCCAGGACTGGTGAAGCCTTCACAGACCCTGTCCCTCACCTGCACTGTCTCTGGTGGCTCCATCAGCAGTTTTGGTTACTACTGGAGCTGGATCCGCCAGCACCCACGGAAGGGCCTGGAGTGGATTGGGTACATCTATTACAGTGGGAGCACCTACTACAACCCGTCCCTCAAGAGTCGACTTACCATGTCAGTAGACACGTCTAAGAACCAGTTCTCCCTGAAGCTGAGCTCTGTGACTGCCGCGGACACGGCCGTGTATTACTGTGCGAGAGATTTAGGACTGCACGATTTTTGGAGTGGCGGCAACTGGTTCGACCCCTGGGGCCAGGGAACCCTGGTCACCGTCTCCTCA	CAGTCTGTGCTGACGCAGCCGCCCTCAGTGTCTGGGGCCCCAGGTCAGAGGGTCACCATCTCCTGCACTGGGAGCAGCTCCAACATCGGGGCAGATTATGATGTACACTGGTACCAGCAGCTTCCAGGAACAGCCCCCAAACTCCTCATCTATGGTGACAGCAATCGGCCCTCAGGGGTCCCTGACCGATTCTCTGGCTCCAAGTCTGGCACCTCAGCCTCCCTGGCCATCACTGGGCTCCAGGCTGAGGATGAGGCTGATTATTACTGCCAGTCCTATGACAGCAGCCTGAGTGGTTCGAGGGTGTTCGGAACTGGGACCAAGGTCACCGTCCTA
281	IML3695	Post-vax	ADI-67117	IGHV3-15*01	IGHD3-3*01	IGHJ1*01	IGLV1-51*01	IGLJ1*01	5	3	Undefined	No						ACCACAATCAACCGAAAATACGATTTTTGGAGTGGTTATTCGGCCGAACAGGTGCAC	TTINRKYDFWSGYSAEQVH	GCATGGGATGACAGCCTGAGTGTTGGAGTG	AWDDSLSVGV	GAGGTGCAGCTGGTGGAGTCTGGGGGAGGCTTGGTGAAGCCTGGGGGGTCCCTTAGACTCTCCTGTGAAGCCTCTGGACTCAGTTTCAGTAGTTCCTGGATGACCTGGGTCCGCCAGGCTCCAGGGAAGGGGCTGGAGTGGGTTGGCCGTATTAAAATCAAAAAAGATGGTGGGACAACAGATTATGCTGCACCCGTGAAAGGCAGATTCACCATCTCAAGAGATGATTCAAAAAACACGCTCTATCTGCAAATGAACAGCCTGGAAACCGAGGACACAGCCGTGTATTACTGTACCACAATCAACCGAAAATACGATTTTTGGAGTGGTTATTCGGCCGAACAGGTGCACTGGGGCCAGGGCACCCTGGTCACCGTCTCCTCA	CAGTCTGTGTTGACGCAGCCGCCCTCAGTGTCTGCGGCCCCAGGACAGAAGGTCACCATCTCCTGCTCTGGGAACAGCTCCAACATTGGAACTAATTATGTATCCTGGTACCAGCAGCTCCCAGGAACAGCCCCCAAACTCCTCATTTATGACAATAATGAGCGACCCTCAGGGATTCCTGACCGATTCTCTGGCTCCAAGTCTGGCACGTCAGCCACCCTGGGCATCACCGGACTCCAGACTGGGGACGAGGCCGATTATTACTGCGGAGCATGGGATGACAGCCTGAGTGTTGGAGTGTTCGGAACTGGGACCAAGGTCACCGTCCTA
282	IML3695	Post-vax	ADI-67118	IGHV1-24*01	IGHD3-16*02	IGHJ6*02	IGKV2-24*01	IGKJ1*01	5.1	1	NTD	No						GCAGCAGCCTTCGCGGTACGTTTGGGGGAATTATCGTCATACCAGTACTACTACGGTATGGACGTC	AAAFAVRLGELSSYQYYYGMDV	ATGCAAGCTTCACACTTTCCTCACACT	MQASHFPHT	CAGGTCCAGCTGGTACAGTCTGGGGCTGAGGTGAAGAAGCCTGGGGCCTCAGCGAAGGTCTCCTGCAAGGTTTCCGGATACATGCTCACTGAATTATCCATACACTGGGTGCGACAGGTTCCTGGAAAAGGGCTTGAGTGGCTGGGAGGTTTTGATCCTGAAGATGCAAAAACAATCTACGCACAGAGGTTTCAGGGCAGAGTCACCATGATCGAGGACACATCTACAGACACAGCCTACATGGAGCTGAGCAGCCTGAGATCTGACGACTCGGCCGTGTATTACTGTGCAGCAGCCTTCGCGGTACGTTTGGGGGAATTATCGTCATACCAGTACTACTACGGTATGGACGTCTGGGGGCAAGGGACCACGGTCACCGTCTCCTCA	GATATTGTGATGACCCAGACTCCACTCTCCTCACCTGTCACCCTTGGACAGCCGGCCTCCATCTCCTGCAGGTCTAGTCAAAGCCTCGTACACAGTGATGGAAACACCTACTTGAGTTGGCTTCAGCAGAGGCCCGGCCAGCCTCCAAGACTCCTAATTTATAAGATTTCTAACCGGTTCTCTGGGGTCCCAGACAGATTCAGTGGCAGTGGGGCAGGGACAGATTTCACACTGAAAATCAGCAGGGTGGAAGCTGAGGATGTCGGGGTTTATTACTGCATGCAAGCTTCACACTTTCCTCACACTTTCGGCCAAGGGACCAAGGTGGAAATCAAA
283	IML3695	Post-vax	ADI-67119	IGHV3-53*02	IGHD6-19*01	IGHJ6*02	IGLV3-9*01	IGLJ2*01	5.8	8.6	RBD	No	0.009788	0.065	0.6351	0.0808		GCGAGAGATTCAGTGAGAGGGGGTATGGACGTC	ARDSVRGGMDV	CAGGTGTGGGACACCACCAGCGTGATC	QVWDTTSVI	GAGGTGCAGCTGGTGGAGACTGGAGGAGGCTTGATCCAGCCTGGGGAATCCCTGAGACTCTCCTGTGCAGCCTCTGGACTCACCGTCAGTACCAACTACATGACGTGGGTCCGCCAGGCTCCAGGGAAGGGGCTGGAGTGGGTCTCAATTATTTATAGTGGTGGCAGCACATTCTACGCAGACTCCGTGAGGGGCCGATTCACCATCTCCAGAGACAATTCCAAGAATACGTTGTATCTTCAAATGAACAGCCTGAGAGTCGAGGACACAGCCGTGTATTTCTGTGCGAGAGATTCAGTGAGAGGGGGTATGGACGTCTGGGGGCAAGGGACCACGGTCACCGTCTCCTCA	TCCTATGAGCTGACTCAGCCACTCTCAGTGTCCGTGGCCTTGGGACAGACGGCCAGAATTACCTGTGGGGGAGACAACGTTGGAGATGAAACTGTGTTCTGGTACCACCAGAAGCCAGGCCAGGCCCCTGTATTGGTCCTGTATGGGGATTCCAACCGGCCCTCTGGGATCCCTGAGCGATTCTCTGGCTCCAAGTCGGGGAACACGGCCACCCTGACCATCACCAGAGCCCAGGCCGGGGATGAGGCTGACTATTACTGTCAGGTGTGGGACACCACCAGCGTGATCTTCGGCGGAGGGACCAAGCTGACCGTCCTA
284	IML3695	Post-vax	ADI-67120	IGHV3-30*18	IGHD5-18*01	IGHJ4*02	IGKV1-5*04	IGKJ1*01	4.1	2.5	RBD	No		>1.0				GCGAAAGCGGGATACGGCTATGCCTACCCGTGGACCTACTTTGACTAT	AKAGYGYAYPWTYFDY	CAACAATATAATAGTTATTGGACG	QQYNSYWT	CAGGTGCAGCTGGTGGAGTCTGGGGGAGGCGCGGTCCAGCCTGGGAGGTCCCTGAGACTCTCCTGTGCAGCCTCTGGATTCACCTTCAGTAACTACGGCATGCACTGGGTCCGCCAGGCTCCAGGCAAGGGGCTGGAGTGGGTGGCAGTTATGTCATATGATGGAGGTGATAAACACTATGCAGACTCCGTGAAGGGCCGATTCACCATCTCCAGAGACAACTCCATGCACACGCTGTATCTGCAAATGAACAGCCTGAGACCTGAGGACACGGCTGTATATTACTGTGCGAAAGCGGGATACGGCTATGCCTACCCGTGGACCTACTTTGACTATTGGGGCCAAGGAACCCTGGTCACCGTCTCCTCA	GACATCCAGATGACCCAGTCTCCTTCCACCCTGTCTGCATCTGTAGGAGACAGAGTCACCATCACTTGCCGGGCCAGTCAGAGTATTAGTACCTGGTTGGCCTGGTATCAGCAGAAACCAGGGAAAGCCCCTAAGCTCCTGATCTATGAGGCATCTGGTTTAGAAAGTGGGGTCCCATCAAGATTCAGCGGCAGTGGATCTGGGACAGAATTTACTCTCACCATCACCAGCCTGCAGCCTGATGATTTTGCAACTTATTACTGCCAACAATATAATAGTTATTGGACGTTCGGCCAAGGGACCAAGGTGGAAATCAAA
285	IML3695	Post-vax	ADI-67121	IGHV3-30-3*01	IGHD6-19*01	IGHJ6*02	IGKV2-28*01	IGKJ2*01	6.4	1.4	NTD	No						GCGAGAGTTTTGAGTGGCTGGTCGGCAGTAACATACGGTATGGACGTT	ARVLSGWSAVTYGMDV	ATGCAAGCTCTACAATCCTTCACT	MQALQSFT	CAGGTGCAGCTGGTGGAGTCTGGGGGAGGCGTGGTCCAGCCTGGGAGGTCCCTGAGACTCTCCTGTGCAGCCTCTGGATTCACCTTCAGTAATTATGCTGTGCACTGGGTCCGCCAGACTCCAGCCAAGGGGCTGGAGTGGGTGGCATTTATATCAAATGATGGGAATAGTAAATACTACGCAGTCTCCGTGAAGGGCCGATTCACCATCTCCAGAGACAATTCCAACAACACACTGTATCTGCAATTGAACAGCCTGAGGCCTGAGGACACGGCTATTTATTACTGTGCGAGAGTTTTGAGTGGCTGGTCGGCAGTAACATACGGTATGGACGTTTGGGGGCAAGGGACCACGGTCACCGTCTCCTCA	GATATTGTGATGACTCAGTCTCCACTCTCCCTGCCCGTCACCCCTGGAGAGCCGGCCTCCATCTCCTGCAGGTCTAGTCAGAGCCTCCTGCATAGTAATGGATACAACTATTTGGATTGGTACCTGCAGAAGCCAGGGCAGTCTCCACAGCTCCTGATCTACTTGGGTTCTAATCGGGGCTCCGGGGTCCCGGACAGGTTCAGTGGCAGTGGATCAGGCACAGATTTTACACTGAAAATCAGTAGAGTGGAGGCTGAGGATGTTGGGGTTTATTACTGCATGCAAGCTCTACAATCCTTCACTTTTGGCCAGGGGACCAAGCTGGAGATCAAA
286	IML3695	Post-vax	ADI-67122	IGHV3-7*01	IGHD3-3*01	IGHJ6*02	IGLV3-19*01	IGLJ1*01	4.8	4.9	S2	No		>1.0				GCGAGACAAAGTATCTATCACGATTTTACGAGTGGTGTAGGTTACTCCTACTACTACACTATGGACGTC	ARQSIYHDFTSGVGYSYYYTMDV	AGCTCCCGGGACAGAAGTGGTAATTCTTTTGTC	SSRDRSGNSFV	GAGGTGCAGCTGGTGGAGTCTGGGGGAGGCTTGGTCCAGCCTGGGGGGTCCCTGAGACTCTCCTGTATAGTCTCTGAATTCACCTTTGATAGCTATTGGATGAGCTGGGTCCGCCAGGCTCCAGGGAAGGGGCTGGAGTGGGTGGCCAACATACGGCACGATGGAAGTGAGAAATACTATGTAGACTCTGTGAGGGGCCGATTCACCATTTCCAGAGACAACGCCAAGAATTCACTGTATCTGCAAATGAACAGCCTGAGAGCCGAGGACTCGGCTGTGTATTACTGTGCGAGACAAAGTATCTATCACGATTTTACGAGTGGTGTAGGTTACTCCTACTACTACACTATGGACGTCTGGGGGCAAGGGACCACGGTCACCGTCTCCTCA	TCTTCTGAGCTGACTCAGGACCCTCCTGTGTCTGTGGCCTTGGGACAGACAGTCACGATCACATGCCAGGGAGACAGCCTCAGAATCTATTTTGCAACCTGGTATCGCCAGAAGGCAGGACAGGCCCCTGTACTTGTCATCTATGGTAAAAACAACCGGCCCTCAGGGATCCCAGACCGATTCTCTGGCTCCAGGTCAGGAGACACAGCTTCCTTGACCATCACTGGGGCTCAGGCGGAAGATGAGGCTGACTATTACTGTAGCTCCCGGGACAGAAGTGGTAATTCTTTTGTCTTCGGAACTGGGACCAAGGTCACCGTCCTA
287	IML3695	Post-vax	ADI-67123	IGHV3-9*01	IGHD3-3*01	IGHJ4*02	IGKV1-6*01	IGKJ4*01	1.7	0.4	NTD	No						GCAAAAGATATTGGTATCGGGCTGGATTTTGGACTGGGCCCCTTTGACTCC	AKDIGIGLDFGLGPFDS	CTACAGGATTACAATTACCCGCTCACT	LQDYNYPLT	GAAGTGCAGCTGGTGGAGTCTGGGGGAGGCTTGGTACAGCCTGGCAGGTCCCTGAGACTCTCCTGTGCAGCCTCTGGATTCACCTTTGATGATTATGCCATGCACTGGGTCCGGCAAGCTCCAGGGAAGGGCCTGGAGTGGGTCTCAAGTATTAGTTGGAAGAGTGGTAGTAGAGCCTATGCGGACTCTGTGAAGGGCCGATTCACCATCTCCAGAGACAACGCCAAGAACTCCCTGTATCTGCAAATGAACAGTCTGAGAGCTGAGGACACGGCCTTGTATTACTGTGCAAAAGATATTGGTATCGGGCTGGATTTTGGACTGGGCCCCTTTGACTCCTGGGGCCAAGGAACCCTGGTCACCGTCTCCTCA	GCCATCCAGATGACCCAGTCTCCATCCTCCCTGTCTGCATCTGTAGGAGACAGAGTCACCATCACTTGCCGGGCAAGTCAGGGCATTAGAAATGATTTAGGCTGGTATCAGCAGAAACCAGGGAAAGCCCCTAAGCTCCTGATCTATGCTGCATCCAGTTTACAAAGTGGGGTCCCATCAAGGTTCAGCGGCAGTGGATCTGGCACAGATTTCACTCTCACCATCAGCAGCCTGCAGCCTGAAGATTTTGCAACTTATTACTGTCTACAGGATTACAATTACCCGCTCACTTTCGGCGGAGGGACCAAGGTGGAGATCAAA
288	IML3695	Post-vax	ADI-67124	IGHV4-31*03	IGHD3-3*01	IGHJ4*02	IGKV3-11*01	IGKJ4*01	3.3	3.1	RBD	No		>1.0		>1.0		GCGAGAGAGGGAGATTTTGCCTTCTTTGACTAC	AREGDFAFFDY	CAGCAGCGTTTCAACTGGCCTCCGCTCACT	QQRFNWPPLT	CAGGTGCAGCTGCAGGAGTCGGGCCCAGGACTGGTGAAGCCTTCACAGACCCTGTCCCTCACGTGCACTGTCTCTGGTGGCTCCATCAGCAGTGGTGGTTACTATTGGACCTGGATCCGCCAGCACCCAGGGAAGGGCCTGGAGTGGATTGGTTACATCCATTACAGTGGGAACACCTACTACAACCCGTCCCTCAAGAGTCGAGTTAGCATATCAGTAGACACGTCAAAGAACCAGTTCTCCCTGCAGCTGAGCTCTGTGACTGCCGCGGACACGGCCGTATATTACTGTGCGAGAGAGGGAGATTTTGCCTTCTTTGACTACTGGGGCCAAGGAACCCTGGTCACCGTCTCCTCA	GAAATTGTGTTGACACAGTCTCCAGCCACCCTGTCTTTGTCTCCAGGGGAGAGAGCCACCCTCTCCTGCAGGGCCAGTCAGAGTGTTCGTAACTACTTAGCCTGGTACCAACAGAAACCTGGCCAGGCTCCCAGGCTCCTCATCTATGATGCGTCCAACAGGGCCACTGGCATCCCAGCCAGGTTCAGTGGCACTGGGTCTGGGACAGACTTCACTCTCACCATCAGCAGCCTAGAGCCTGAAGATTTTGCTGTTTATTACTGTCAGCAGCGTTTCAACTGGCCTCCGCTCACTTTCGGCGGAGGGACCAAGGTGGAGATCAAA
289	IML3695	Post-vax	ADI-67125	IGHV3-33*01	IGHD1-26*01	IGHJ2*01	IGKV3-20*01	IGKJ1*01	6.4	2.8	Undefined	No						GCGAGAGAGTGGTGGGACCTATACCCGAGGGCTTTTGATCTC	AREWWDLYPRAFDL	CAGCAGTATGGTAGCTCCTGGACG	QQYGSSWT	CAGGTGCAGCTGGTGGAGTCTGGGGGAGGCGTGGTCCACCCTGGGAGGTCCCTGAGACTCTCCTGTGTAGCGTCTGGAATCACCTTCAAAAATTATGGCATGCACTGGGTCCGCCAGGCTCCAGGCAAGGGGCTGGAGTGGGTGGCAACTATATGGTATGATGGAAGTAGAAAATACTATACAGACTTCGTGAAGGGCCGATTCACCATCACCAGAGACAATTCCAAGAACACCCTGTATCTGGAAATGAACAGCCTTAGAGACGAGGACACGGCTGTATATTACTGTGCGAGAGAGTGGTGGGACCTATACCCGAGGGCTTTTGATCTCTGGGGCCGTGGCACCCTGGTCACTGTCTCCTCA	GAAATTGTGTTGACGCAGTCTCCAGGCACCCTGTCTTTGTCTCCAGGGGAAAGAGCCGCCCTCTCCTGCAGGGCCAGTCAGAGTGTTAGCAGCGGCTACTTAGCCTGGTACCAGCAGAAACCTGGCCAGACTCCCAGGCTCCTCATCTATGGTGCATCCAGCAGGGCCACTGGCATCCCAGACAGGTTCAGTGGCAGTGGGTCTGGGACAGACTTCACTCTCACCATCAGGAGACTGGAGCCTGAAGATTCTGCAATATATTTCTGTCAGCAGTATGGTAGCTCCTGGACGTTCGGCCAAGGGACCAAGGTGGAAATCAAA
290	IML3695	Post-vax	ADI-67126	IGHV4-4*07	IGHD3-22*01	IGHJ4*02	IGLV6-57*02	IGLJ2*01	2.8	0.3	Undefined	No						GTGCGGGCTCAGTGGTTAAGGGGCTACTTTGACTCC	VRAQWLRGYFDS	CAGTCTTATGATAGCAGCACCTATGTGGTA	QSYDSSTYVV	CAGGTGCAGCTGCAGGAGTCGGGCCCAGGACTGGTGAAGCCTTCGGAGACCCTGTCCCTCACCTGCACTGTCTCTGGTGGCTCCATCAGTACTTACTACTGGAGCTGGATCCGGCAGCCCGCCGGGAAGGGACTGCAGTGGATTGGACATATCTATGCCAGTGGGAACACCAACTACAACCCCTCCCTCAAGAGTCGAGTCACCATGTCAGTAGACACGTCCAAGAACCGGTTCTCCCTGAAACTGAGCTCTGTGACCGCCGCGGACACGGCCGTGTATTACTGCGTGCGGGCTCAGTGGTTAAGGGGCTACTTTGACTCCTGGGGCCAAGGAACCCTGGTCACCGTCTCCTCA	AATTTTATGCTGACTCAGCCCCACTCTGTGTCGGAGTCTCCGGGGAAGACGGTAACCATCTCCTGCACCGGCAGCAGTGGCAGCATTGCCAGCAACTATGTGCAGTGGTACCAGCAGCGCCCGGGCAGTGCCCCCACCACTGTGATCTATGAGGATAACCAAAGACCCTCTGGGGTCCCTGATCGATTCTCTGGCTCCATCGACAGCTCCTCCAACTCTGCCTCCCTCACCATCTCTGGACTGAAGACTGAGGACGAGGCTGACTACTACTGTCAGTCTTATGATAGCAGCACCTATGTGGTATTCGGCGGAGGGACCAAGCTGACCGTCCTA
291	IML3695	Post-vax	ADI-67127	IGHV3-9*01	IGHD6-13*01	IGHJ3*02	IGLV1-51*01	IGLJ3*02	3.7	0.3	RBD	No	0.1827	0.0541	>1.0	>1.0		GCAAAAGATGATTATCCCAGCAGCTGGTATGAACACCACCCACAGAGGTGGGCTTTTGATATC	AKDDYPSSWYEHHPQRWAFDI	ACATGGGATAGCAGCCTGAGTGTTGTG	TWDSSLSVV	GAAGTGCAGCTGGTGGAGTCTGGGGGAGGCTTGGTACAGCCTGGGGGGTCCCTGAGACTCTCCTGTGCAGCCTCTGGATTCACCTTTGAAGATTATGCCATGCACTGGGTCCGGCAAGCTCCAGGGAAGGGCCTGGAGTGGGTCTCAGGTATTAGTTGGAATAGTGGTGTCATAGACTATGCGGACTCTGTGAAGGGCCGATTCATCATCTCCAGAGACAACACCAAGAATTCCCTGTATCTGCACATGAACAGTCTGAGACCTGAGGACACGGCCTTGTATTACTGTGCAAAAGATGATTATCCCAGCAGCTGGTATGAACACCACCCACAGAGGTGGGCTTTTGATATCTGGGGCCAAGGGACAATGGTCACCGTCTCTTCA	CAGTCTGTGTTGACGCAGCCGCCCTCAGTGTCTGCGGCCCCAGGACAGAAGGTCACCATCTCCTGCTCTGGAAGCAGCTCCAACATTGGGAATAATTATGTATCCTGGTACCAGCAGCTCCCAGGAACAGCCCCCAAACTCCTCATTTATGACAATAATAAGCGACCCTCAGGGATTCCTGACCGATTCTCTGGCTCCAAGTCTGGCACGTCAGCCACCCTGGGCATCACCGGACTCCAGACTGGGGACGAGGCCGATTATTACTGCGGAACATGGGATAGCAGCCTGAGTGTTGTGTTCGGCGGAGGGACCAAGCTGACCGTCCTA
292	IML3695	Post-vax	ADI-67128	IGHV3-13*01	IGHD3-22*01	IGHJ4*02	IGKV1-39*01	IGKJ5*01	4.1	2.4	RBD	No		>1.0	>1.0	>1.0		GTCAGAGTTAACTATGATAGTAGTGGTTATTACCACTACTTTGACTAC	VRVNYDSSGYYHYFDY	CAACAGACTTACAATATCCCTCCGATCACC	QQTYNIPPIT	GAGGTGCAGCTGGTGGAGTCTGGGGGAGGCTTGGTGCAGCCTGGGGGGTCCCTGAGACTCTCCTGTGCAGCCTCTGGATTCACCTTCAGTAACTACGACATGCACTGGGTCCGCCAAGGTGCAGGAAAAGGTCTGGAATGGGTCTCACTTATTGGTACTGATGGTGACACATACTATCCAGCCTCCGTGAAGGGCCGATTCACCATCTCCAGAGAAAATGCCAAGAACTCCTTATATCTTCAAATGAACAGCCTGAGAGCCGGGGACACGGCTGTGTATTACTGTGTCAGAGTTAACTATGATAGTAGTGGTTATTACCACTACTTTGACTACTGGGGCCAAGGAACCCTGGTCACCGTCTCCTCA	GACATCCAGATGACCCAGTCTCCATCCTCCCTGTCTGCATCTGTAGGAGACAGAGTCACCATCACTTGCCGGGCAAGTCAGAGCATTAGTAACTATTTAAATTGGTATCAGCAGAAACCAGGGAAAGCCCCTAAGCTCCTGATCTACGCTGCATCCAGTTTGCAAAGTGGGGTCCCATCACGGTTCAGTGGCAGTGGATCTGGGACAGATTTCACTCTCACCATCAGCAGTCTGCAACCTGAAGATTTTGCAACTTACTACTGTCAACAGACTTACAATATCCCTCCGATCACCTTCGGCCAAGGGACACGACTGGAGATTAAA
293	IML3695	Post-vax	ADI-67129	IGHV1-2*04	IGHD3-10*01	IGHJ6*02	IGLV2-14*03	IGLJ3*02	6.8	2.7	Undefined	No				>1.0		GCGAGAGATCGTCCTCTCTACTATCGTTCGGACTACGGTATGGACGTC	ARDRPLYYRSDYGMDV	AGCTCATATACAATCAACAGCACTGTGCTG	SSYTINSTVL	CAGGTGCAGCTGGTGCAGTCTGGGGCTGAGGTGAAGAAGCCTGGGGCCTCAGTGAAGGTCTCCTGCAAGGCTTCTGGATACACCTTCACCGACTACTTTTTTCATTGGGTGCGACAGACCCCTGGACAAGGGCTTGAGTGGATGGGATGGATCAACCCTACCAGTGGCGGCACAAAGTATGCACAGAAGTTTCAGGGCTGGGTCACCATAACCAGGGACACGTCCATCACCACAGCCTATTTGGAGTTGACTAGGCTGAAATGTGACGACACGGCCATTTATTACTGTGCGAGAGATCGTCCTCTCTACTATCGTTCGGACTACGGTATGGACGTCTGGGGGCAAGGGACCACGGTCACCGTCTCCTCA	CAGTCTGCCCTGACTCAGCCTGCCTCCGTGTCTGGGTCTCCTGGACAGTCGATCACCATCTCCTGCGCTGGAACCAGCAGTGACGTTGGTGCTTATAACTATGTCTCCTGGTACCAACAACACCCAGGCAAAGCCCCCAAACTCATGATTTATGATGTCAGTACTCGGCCCTCAGGGGTTTCTAATCGCTTCTCTGGCTCCAAGTCTGGCAACACGGCCTCCCTGACCATCTCTGGGCTCCAGGCTGAGGACGAGGCTAGTTATTATTGCAGCTCATATACAATCAACAGCACTGTGCTGTTCGGCGGAGGGACCAAGCTGACCGTCCTA
294	IML3695	Post-vax	ADI-67130	IGHV1-69*01	IGHD5-12*01	IGHJ4*02	IGLV1-40*01	IGLJ2*01	4.1	3.7	RBD	No		>1.0	>1.0	>1.0		GCGAGAGACCGTGGGTATAGTGGCTACGGAGCCAGCCTGTATTTTGACTAC	ARDRGYSGYGASLYFDY	CAGTCCTATGACAGCGGCCTGAGTGGTGTGGTT	QSYDSGLSGVV	CAGGTGCAGCTGGTGCAGTCTGGGGCTGAGGTGAAGAAGCCTGGGTCCTCGGTGAAGGTCTCCTGCAAGGCTTCTGGAGGCACCTTCAGCAGCTATGCCATCAGTTGGGTGCGACAGGCCCCTGGACAAGGGCTTGAGTGGATGGGAGGGATCATCCCTATCACTGGGACAACAAACTTCGCAGAGAAGTTCCAGGGCAGAGTCACGATTACCGCGGACGAATCCACGAGCACAGCCTACATGGAGCTGAGTAGTCTGACATCTGAGGACACGGCCGTCTATTACTGTGCGAGAGACCGTGGGTATAGTGGCTACGGAGCCAGCCTGTATTTTGACTACTGGGGCCAAGGAACCCTGGTCACCGTCTCCTCA	CAGTCTGTGCTGACGCAGCCGCCCTCAGTGTCTGGGGCCCCAGTGCAGGAGTTGCTCACCATCTCCTGCACTGGGAGCAACTCCAACATCGGGGCAGGTTATGATGTACACTGGTACCAGCAGCTTCCAGGAACAGCCCCCAAACTCCTCATCTATCGTAACAGCAATCGGCCCTCAGGGGTCCCTGACCGATTCTCTGGCTCCAAGTCTGACACCTCAGCCTCCCTGGCCATCACTGGGCTCCAGGCTGAGGATGAGGCTGATTATTACTGCCAGTCCTATGACAGCGGCCTGAGTGGTGTGGTTTTCGGCGGAGGGACCAAGCTGACCGTCCTA
295	IML3695	Post-vax	ADI-67131	IGHV3-23*01	IGHD3-10*01	IGHJ4*02	IGKV3-15*01	IGKJ1*01	4.8	3.5	NTD	No						GCGAAACGATCCGGATTACTCTGGTTCGGGGAGTTATTTGACTTC	AKRSGLLWFGELFDF	CAACAGTATAAAAGCTGGCCTCAGACG	QQYKSWPQT	GAGGTGCAGCTGTTGGAGTCTGGGGGAGGCTTGGTACAGCCGGGGGGGTCCCTGAGACTCTCCTGTGCAGCCTCTGGCTTCTCCTTCAGCAGCTATGTCATGACCTGGGTCCGCCAGGCTCCAGGGAAGGGGCTGGAGTGGGTCTCAGCTATTAGTGGTAGTGGTGACAGCACATATTACGGAGACTCCGTGAAGGGCCGGTTCGCCATCTCCAGAGACAATTCCAAGCACACACTGTTTCTGCAAATGAACAGCCTGAGAGCCGAGGACACGGCCGTATATTACTGTGCGAAACGATCCGGATTACTCTGGTTCGGGGAGTTATTTGACTTCTGGGGCCAGGGCACCCTGGTCACCGTCTCCTCA	GAAATAGTGATGACGCAGTCTCCAGCCACCCTGTCTGTGTCTCCAGGGGAAAGAGCCACCCTGTCCTGCAGGGCCAGTCAGAGTATTAGCAGCAACTTAGCCTGGTACCAGCAGAAACCTGGCCAGGCTCCCAGGCTCCTCATGCATGGTGCATCCACCAGGGCCACTGGTGTCCCAGCCAGGTTCAGTGGCAGTGGGTCTGGGACAGAGTTCACTCTCGCCATCAGCAGCCTGCAGTCTGAAGATTTTGCAGTTTATTACTGCCAACAGTATAAAAGCTGGCCTCAGACGTTCGGCCAAGGGACCAAGGTGGAAATCAAA
296	IML3695	Post-vax	ADI-67132	IGHV3-13*01	IGHD3-10*01	IGHJ6*02	IGKV1-39*01	IGKJ5*01	1	1.7	Undefined	No		>1.0				GCAAGAGCGACTACTAACATGGTTCGGGGAGTTAGTCCTTTGGACTACTACTACGGTATGGACGTC	ARATTNMVRGVSPLDYYYGMDV	CAACAGAGTTACAATATCCCTCCGATCACC	QQSYNIPPIT	GAGGTGCAGCTGGTGGAGTCTGGGGGAGGCTTGGTACAGCCTGGGGGGTCCCTGAGACTCTCCTGTGCAGCCTCTGGATTCACCTTCAGTAGCTACGACATGCACTGGGTCCGCCAAGCTACAGGAAAAGGTCTGGAGTGGGTCTCACTTATTGGTACTGCTGGTGACACATACTATCCAGACTCCGTGAAGGGCCGATTCACCATCTCCAGAGAAAATGCCAAGAACTCCTTGTATCTTCAAATGAACAGCCTGAGAGCCGGGGACACGGCTGTGTATTACTGTGCAAGAGCGACTACTAACATGGTTCGGGGAGTTAGTCCTTTGGACTACTACTACGGTATGGACGTCTGGGGGCAAGGGACCACGGTCACCGTCTCCTCA	GACATCCAGATGACCCAGTCTCCATCCTCCCTGTCTGCATCTGTAGGAGACAGAGTCACCATCACTTGCCGGGCAAGTCAGAGCATTAGCAGCTATTTAAATTGGTATCAGCAGAAACCAGGGAAAGGCCCTAAGCTCCTAATCTATGCTGCATCCAGTTTACAAAGTGGGGTCCCATCAAGGTTCAGTGGCAGTGGATCTGGGACAGATTTCACTCTCACCATCAGCAGTCTGCAACCTGAAGATTTTGCAACTTACTACTGTCAACAGAGTTACAATATCCCTCCGATCACCTTCGGCCAAGGGACACGACTGGAGATTAAA
297	IML3695	Post-vax	ADI-67133	IGHV3-30*18	IGHD5-18*01	IGHJ4*02	IGKV1-33*01	IGKJ5*01	4.1	2.8	RBD	No		0.5271				GCGAAAGGGCTCTCCTATGGTTATGTTTACTTCTTTGACTAC	AKGLSYGYVYFFDY	CAACAGTATAATAATCTCCCGATCACC	QQYNNLPIT	CAGGTGCAGCTGGTGGAGTCTGGGGGAGGCGTGGTCCAGCCTGGGAGGTCCCTCAGACTCTCCTGTGCAGCCTCTGGATTCCCCTTCAACAACTATGCCATGCACTGGGTCCGCCAGGCTCCAGGCAAGGGGCCGGAGTGGGTGGCAGTTATATCATATGATGGAAGTAATAAATACTATGGAGACTCCGTGAAGGGCCGATTCACCATCTCCAGAGACAATTCCAAGAGCACCCTGTATCTGCAAATGGACAGCCTGAGAACTGAGGACACGGCTGTGTATTACTGTGCGAAAGGGCTCTCCTATGGTTATGTTTACTTCTTTGACTACTGGGGCCAAGGAACCCTGGTCACCGTCTCCTCA	GACATCCAGATGACCCAGTCTCCATCCTCCCTGTCTGCATCTGTAGGAGACAGAGTCACCATCACTTGCCAGGCGAGTCAGGACATTACCAACTATTTAAATTGGTATCAGCAAAAACCGGGGAAAGCCCCTAAGCTCCTGATCTACGATGCATCCGATTTGGAGACAGGGGTCCCATTAAGGTTCAGTGGAAGTGGATCTGGGACAGATTTTACTTTCACCATCAGCAGCCTGCAGCATGAAGATATTGCAACATATTACTGTCAACAGTATAATAATCTCCCGATCACCTTCGGCCAAGGGACACGACTGGAGATTAAA
298	IML3695	Post-vax	ADI-67134	IGHV1-69*06	IGHD6-13*01	IGHJ1*01	IGKV2-30*01	IGKJ2*01	3.4	0	RBD	No		>1.0		>1.0		GCGAGAACTAAGGGTATAGAAGCAGCTGGTACTTTCGGTGATTTAACATTC	ARTKGIEAAGTFGDLTF	ATGCAAGGTACACACCCGTACACT	MQGTHPYT	CAGGTGCAGCTGGTGCAGTCTGGGGCTGAGGTGAAGAAGCCTGGGTCCTCGCTGAATGTCTCCTGCAAGGCTTCTGGAGGCACCTTCAGTTACTATGCTATCAGCTGGGTGCGACAGGCCCCTGGACAAGGCCTTGAGTGGATGGGAGGGATCATCCCTATCTTTGGTACAGCAAACTTCGCACAGAAGTTCCAGGGCAGAATCACGATTACCGCGGACAAATCCACGAGCACAGCCTACATGGAGCTGAGCAGCCTGAGATCTGAGGACACGGCCGTCTATTTCTGTGCGAGAACTAAGGGTATAGAAGCAGCTGGTACTTTCGGTGATTTAACATTCTGGGGCCAGGGCACCCTGGTCACCGTCTCCTCA	GATGTTGTGATGACTCAGTCTCCACTCTCCCTGCCCGTCACCCTTGGACAGCCGGCCTCCATCTCCTGCAGGTCTAGTCAAAGCCTCGTATACAGTGATGGAAACACCTACTTGAATTGGTTTCAGCAGAGGCCAGGCCAATCTCCAAGGCGCCTAATTTATAAGGTTTCTAACCGGGACTCTGGGGTCCCAGACAGATTCAGCGGCAGTGGGTCAGGCACTGATTTCACACTGAAAATCAGCAGGGTGGAGGCTGAGGATGTTGGGGTTTATTACTGCATGCAAGGTACACACCCGTACACTTTTGGCCAGGGGACCAAGCTGGAGATCAAA
299	IML3695	Post-vax	ADI-67135	IGHV3-9*01	IGHD6-13*01	IGHJ4*02	IGKV2D-29*01	IGKJ4*01	5.1	1.7	RBD	No		0.0025		>1.0		GCAAAAGGAGGAGAGTATAGCAGTAGATGGTACCTTCGGGAGAGTTACTTTGACTAC	AKGGEYSSRWYLRESYFDY	ATGCAAAGTATACAGGTTCCTCTCACT	MQSIQVPLT	GAAGTGCAGCTGGTGGAGTCTGGGGGAGGCTTGGTACAGCCTGGCAGGTCCCTGAGACTTTCCTGTGCAGCCTTTGGATTCACCTTTGAAGATTATACCATGCAATGGGTCCGGCAAGCTCCAGGGAAGGGCCTGGAGTGGGTTTCAGGTATTAGTTGGAATAGTGGTAGCACAGGCTATGCGGAATTTGTGAAGGGCCGATTCACCATTTCCAGAGACAACGCCAAGAACTCCCTGTATTTGCAGATGAACAGTCTGGGAGGTGAGGACACGGCCTTCTATTACTGTGCAAAAGGAGGAGAGTATAGCAGTAGATGGTACCTTCGGGAGAGTTACTTTGACTACTGGGGCCAAGGAACCCTGGTCACCGTCTCCTCA	GATATTGTGATGACCCAGACTCCACTCTCTCTGTCCGTCACCCCTGGACAGCCGGCCTCCATCTCCTGCAAGTCTAGTCATAGCCTCCTGCATAGTGATGGAAAGACCCGTTTGTATTGGTACCTGCTGAAGCCAGGCCAGCCTCCACAGCTCCTGATCTATGAAGTTTCCAACCGGTTCTCTGGAGTGCCAGATAGGTTCAGTGGCAGCGGGTCAGGGACAGATTTCACACTGAAAATCAGCCGGGTGGAGGCTGAGGATGTTGGGGTTTATTACTGCATGCAAAGTATACAGGTTCCTCTCACTTTCGGCGGAGGGACCAAGGTGGAGATCAAA
300	IML3695	Post-vax	ADI-67136	IGHV2-5*01	IGHD3-22*01	IGHJ4*02	IGKV1-12*01	IGKJ5*01	3.4	2.8	Undefined	No		>1.0				GCACATTCCTATTACTATGATGCTCGTGGCTACTGCTTTGACTAC	AHSYYYDARGYCFDY	CAACAGGCTAACAATTTCCCGATCACC	QQANNFPIT	CAGATCACCTTGAAGGAGTCTGGTCCTACGCTGGTGAAACCCACACAGACCCTCACGCTGACCTGCACCTTCTCTGGGTTCTCACTCAGCTCTAATGGAGTGGGTGTGGGCTGGATCCGTCAGCCCCCAGGAAAGGCCCTCGAATGGCTGGCACTCATTTATTGGAATGATGAGAAGCGCTACAGCCCATCTCTGAAGAGCAGGCTCACCATCACCAAGGACACCTCCAAAAACCATGTGGTCCTTACAGTGACCAATATGGACCCTGTGGACACAGCCACATATTCCTGTGCACATTCCTATTACTATGATGCTCGTGGCTACTGCTTTGACTACTGGGGCCAAGGAACCCTGGTCACCGTCTCCTCA	GACATCCAGATGACCCAGTCTCCATCTTCCGTGTCTGCGTCTGTAGGAGACAGAGTCACCATCACTTGTCGGGCGAGTCAGGGTATTGTCAGCTGGTTAGCCTGGTATCAGCAGAAACCAGGGAAAGCCCCTAAACTCCTGATCTATGATGCATCCACTTTGCAAAGTGGGGTCCCATCAAGGTTCAGCGGCAGTGGATCTGGGACAGATTTCACACTCACCATCAGCAGCCTGCAGCCTGAAGATTTTGCAACTTACTATTGTCAACAGGCTAACAATTTCCCGATCACCTTCGGCCAAGGGACACGACTGGAGATTAAA
301	IML3695	Post-vax	ADI-67137	IGHV5-51*01	IGHD3-10*01	IGHJ4*02	IGLV2-14*03	IGLJ1*01	4.1	2.4	RBD	No			>1.0	>1.0		ACGAGACAAATCGGTCACTATGGTTCGGGGAGTGAGGACTAC	TRQIGHYGSGSEDY	AGCTCATATACAAGTAGAAACACTCTCGGGGAGGTC	SSYTSRNTLGEV	GAGGTGCAGCTGGTGCAGTCTGGAGCAGAGGTGAAAAAGCCCGGGGAGTCTCTGAAGATCTCCTGTAAGGGCTCTGGATACAACTTTGCCAACTACTGGATCGGCTGGGTGCGCCAGATGCCCGGGAAAGGCCTGGAGTGGATGGGAATTATCTATCCTAGTCACTCTGATATCAGATACAGTCCGTCCTTCCAAGGCCAGGTCACCATCTCAGCCGACAAGTCCATCAGCACCGCCTACCTGCAGTGGAGCAGCCTGAAGGCCTCGGACACCGCCATGTATTATTGTACGAGACAAATCGGTCACTATGGTTCGGGGAGTGAGGACTACTGGGGCCAAGGAACCCTGGTCACCGTCTCCTCA	CAGTCTGCCCTGACTCAGCCTGCCTCCGTGTCTGGGTCTCCTGGACAGTCGATCACCATCTCCTGCACTGGAACCAGCAGTGACGTTGGAGGTTATAATCATGTCTCCTGGTACCAACAACACCCAGGCAAAGCCCCCAAACTCATGATTTATGATGTCAGTAATCGGCCCTCAGGGGTTTCTAATCGCTTCTCTGGCTCCAAGTCTGGCAACACGGCCTCCCTGACCATCTCTGGGCTCCAGGCTGAGGACGAGGCTGATTATTATTGCAGCTCATATACAAGTAGAAACACTCTCGGGGAGGTCTTCGGAACTGGGACCAAGGTCACCGTCCTA
302	IML3695	Post-vax	ADI-67138	IGHV4-39*01	IGHD3-3*01	IGHJ4*02	IGLV2-8*01	IGLJ1*01	6.1	2.7	RBD	No	0.004513	0.0065	0.001	0.003	0.002276	GCGGTGGGGGGGGTACGCTCTTTGGAGTGGTTATTACAGTTTGATTAT	AVGGVRSLEWLLQFDY	AGCTCATATGCAGGCAGCAGCAGTTTGGTA	SSYAGSSSLV	CAGCTGCAGCTGCAGGAGTCGGGCCCAGGACTGGTGAAGCCTTCGGAGACCCTGTCCCTCACCTGCACTGTCTCGGGTGACTCCATCACCAGTCGCAATTACTACTGGGGCTGGGTCCGCCAGCCCCCAGGGAAGGGGCTGGAGTGGATTGGGAGTATTTTTTATAATGTGAACACCTACTACAACCCGTCCCTCATGAGTCGAATCACCATGTCCGTAGACACGTCCAAGAACCAGTTCTCCCTGAAGCTGACCTCTCTGACCGCCGCGGACACGGCTGTGTATTACTGTGCGGTGGGGGGGGTACGCTCTTTGGAGTGGTTATTACAGTTTGATTATTGGGGCCAAGGAACCCTGGTCACCGTCTCCTCA	CAGTCTGCCCTGACTCAGCCTCCCTCCGCGTCCGGGTCTCCTGGACAGTCAGTCACCATCTCCTGCACTGGAACCAGCAGTGACGTTGGTTATTCTAACTATGTCTCCTGGTACCAACAACACCCAGGCAAAGCCCCCAAACTCATGATTTTTGAGGTCAGTGAGCGGCCCTCAGGGGTCCCTGATCGCTTCTCTGGCTCCAAGTCTGGCAACACGGCCTCCCTGACCGTCTCTGGGCTCCAGGCTGAGGATGAGGCTGATTATTACTGCAGCTCATATGCAGGCAGCAGCAGTTTGGTATTCGGAACTGGGACCAAGGTCACCGTCCTA
303	IML3695	Post-vax	ADI-67139	IGHV4-31*03	IGHD4-17*01	IGHJ4*02	IGKV3-11*01	IGKJ5*01	3.3	1.7	RBD	No		0.2125	>1.0	>1.0		GCGAGAGATAGTGACTACGGGGAATACTTTGACTCC	ARDSDYGEYFDS	CAGCAGCGTTACAACTGGCCTCCGATCACC	QQRYNWPPIT	CAGGTGCAGCTGCAGGAGTCGGGCCCAGGACTGGTGAAGCCTTCACAGACCCTGTCCCTCACCTGCACTGTCTCTGGTGGCTCCATCAGCAGTGGTAGTTACTACTGGAGCTGGATCCGCCAGCACCCAGGGAAGGGCCTGGAGTGGATTGGGTACATCCATTACAGTGGGAACACCTACTATAATCCGTCCCTCAAGAGTCGAATTAGCATATCAGTAGACACGTCTAAGAACCACTTCTCCCTGAAGCTAAACTCTGTGACTGCCGCGGACACGGCCGTGTATTACTGTGCGAGAGATAGTGACTACGGGGAATACTTTGACTCCTGGGGCCAGGGCACCCTGGTCACCGTCTCCTCA	GAAATTGTGTTGACACAGTCTCCAGCCACCCTGTCTTTGTCTCCAGGGGAAAGAGCCACCCTCTCCTGCAGGGCCAGTCAGAGTGTTAGCAGCTACTTAGCCTGGTATCAACAGAAAGCTGGCCAGGCTCCCAGGCTCCTCATCTATGATGCATCCAACAGGGCCACTGGCATCCCAGCCAGGTTCAGTGGCAGTGGGTCTGGGACAGACTTCACTCTCACCATCAGCAGCCTAGAGCCTGAAGATTATGCAGTTTATTACTGTCAGCAGCGTTACAACTGGCCTCCGATCACCTTCGGCCAAGGGACACGACTGGAGATTAAA
304	IML3695	Post-vax	ADI-67140	IGHV3-53*02		IGHJ3*02	IGKV1-9*01	IGKJ4*01	5.5	2.1	RBD	No		0.012	>1.0	0.015		GCGAGAGAAGCTTATGCTTTTGATATC	AREAYAFDI	CAACAGCTTAATAGTCACCCTCCGGCT	QQLNSHPPA	GAGGTGCAGCTGGTGGAGACTGGAGGAGGCTTGATTCAGCCGGGGGGGTCCCTAAGACTCTCCTGTGCAGCCTCTGGGGTCATCATCAGTAACAACTACATGAGCTGGGTCCGCCAAGCTCCAGGGAAGGGGCTGGAGTGGGTCTCAGTTATTTATAGCGGTGGTAGCACATTCTACGCAGACTCCGTGAAGGGCCGATTCACCATCTCCAGAGACAATTCTAAGAATACACTGTATCTTCAAATGAACAACCTGCGAGCCGAGGACACGGCCGTTTATTTCTGTGCGAGAGAAGCTTATGCTTTTGATATCTGGGGCCAAGGGACAATGGTCACCGTCTCTTCA	GACATCCAGTTGACCCAGTCTCCATCCTTCCTGTCTGCATCTGTAGGAGACAGAGTCACCATCACTTGCCGGGCAAGTCAGGGCATTAGCAGTTATTTAGCCTGGTATCAGCAAAAACCAGGGAAAGCCCCTAAACTCCTGATCTATGGTGCATCCACTTTGCAACGTGGGGTCCCATCAAGGTTCAGCGGCAGTGGATCTGGGACAGAATTCACTCTCACAATCACCAGCCTGCAGCCTGAAGATTTTGCAACTTATTACTGTCAACAGCTTAATAGTCACCCTCCGGCTTTCGGCGGAGGGACCAAGGTGGAGATCAAA
305	IML3695	Post-vax	ADI-67141	IGHV3-33*01	IGHD3-9*01	IGHJ4*02	IGKV1-5*04	IGKJ4*01	6.4	6.3	S2	No						GCGAAAGATAGAAGTACAACATATTCCGGTATGTTGAGTGGTTTTCTTGACTCC	AKDRSTTYSGMLSGFLDS	CAACAATCTAAAATCATTTCTCGCCTCGCT	QQSKIISRLA	CAGGTGCAGCTGGTGGAGTCTGGGGGAGGCGTGGTCCAGCCTGGGAGGTCCCTGAGACTCTCCTGTGCAGCGTCTGGATTTAACTTCAGCACTTCTGGCATGCACTGGGTCCGCCAGGCTCCAGGCAAGGCGCTGGAGTGGGTGGCAATTATTTGGTATGATGGAAATAATCAATATTATGCAGACTCCGTGAAGGGCCGATTCACCATCTCCAGAGACAATTCCAAGAACACGCTATATCTCCAAATGAGCAGCCTGCGAGCCGAGGACACGGCTCTCTATTACTGTGCGAAAGATAGAAGTACAACATATTCCGGTATGTTGAGTGGTTTTCTTGACTCCTGGGGCCAAGGAACCCTGGTCACCGTCTCCTCA	GACATCCAGATGACCCAGTCTCCTTCCACCCTGTCTGCTTCTGTAGGAGACAGAGTCACCATCACTTGCCGGGCCAGTCAGGATATTAGTACCTGGTTGGCTTGGTATCAGCAGAAACCAGGGAAAGCCCCTAACCTCCTGATCTATAAGGCATCTACTTTAGAGACTGGGGTCCCATCAAGGTTCAACGGCAGTGGATCTGGGACAGAATTCACTCTCACCATCAACAGCCTGCAGCCTGATGATTTTGCAACTTATTACTGCCAACAATCTAAAATCATTTCTCGCCTCGCTTTCGGCGGAGGGACCAAGGTGGAGATCAAA
306	IML3695	Post-vax	ADI-67142	IGHV3-33*01	IGHD3-9*01	IGHJ4*02	IGKV4-1*01	IGKJ1*01	5.4	1	S2	No						GCGAAAGATAGAGGTAGAACATATTCCGGTATGTTGAGTGGTTATCTTGACTAC	AKDRGRTYSGMLSGYLDY	CAGCAATATTATAGTACTCCCCCGTACACT	QQYYSTPPYT	CAGGTGCAGCTGGTGGAGTCTGGGGGAGGCGTGGTCCAGCCTGGGAGGTCCCTGAGACTCTCCTGTGCAGCGTCTGGATTCACCTTCAGCACTTCTGGCATGCACTGGGTCCGCCAGGCTCCAGGCAAGGCGCTGGAGTGGGTGGCAATTATTTGGTATGATGGAGATAATCAATACTATGCAGACTCCGTGAAGGGCCGATTCACCATCTCCAGAGACAATTCCAAGAACACGCTATATCTCCAAATGAGCAGCCTGAGAGCCGAGGACACGGCTATCTATTACTGTGCGAAAGATAGAGGTAGAACATATTCCGGTATGTTGAGTGGTTATCTTGACTACTGGGGCCAAGGAACCCTGGTCACCGTCTCCTCA	GACATCGTGATGACCCAGTCTCCAGACTCCCTGGCTGTGTCTCTGGGCGAGAGGGCCACCATCAACTGCAAGTCCAGCCAGAGTGTTTTGTACAACTCCAACAATAAGAACTACTTAGCTTGGTACCAGCAGAAACCAGGACAGCCTCCTAAGCTGCTCATTTACTGGGCATCTACCCGGGAATCCGGGGTCCCTGACCGATTCAGTGGCAGCGGGTCTGGGACAGATTTCACTCTCACCATCAGCAGCCTGCAGGCTGAAGATGTGGCAGTTTATTACTGTCAGCAATATTATAGTACTCCCCCGTACACTTTCGGCCAAGGGACCAAGGTGGAAATCAAA
307	IML3695	Post-vax	ADI-67143	IGHV3-30-3*01	IGHD1-1*01	IGHJ4*02	IGKV4-1*03	IGKJ4*01	4.1	1.7	S2	Yes						GTGAGGACACATTATAACAACAACTGGACCCTAGGGGACTACTTTGACTAC	VRTHYNNNWTLGDYFDY	CAGCAATATTATAGTCCTCCGCTCACT	QQYYSPPLT	CAGGTGCAGCTGGTGGAGTCTGGGGGAGGCGTGGTCCAGCCTGGGAGGTCCCTGAGACTCTCCTGTGCAGCCTCTGGATTCACCTTCAGTTCCTATTCTATACACTGGGTCCGCCAGGCTCCAGGCAAGGGGCTGGAGTGGGTGGCAGGTATATCATATGATGAAAGCAATAAATACTACGCAGACTCCGTGAAGGGCCGATTCATCATCTCCAGAGACAAATCTAAGAACACGCTGTATCTGCAAATGAACAGCCTGAGAGCTGAGGACGCGGCTGTTTATTACTGTGTGAGGACACATTATAACAACAACTGGACCCTAGGGGACTACTTTGACTACTGGGGCCAAGGAACCCTGGTCACCGTCTCCTCA	GACATCGTGATGACCCAGTCTCCAGACTCCCTGGCTGTGTCTCTGGGCGAGAGGGCCACCATCAACTGCAAGTCCAGCCAGAGTGTTTTATACAGCTCCAACAATAAGCACTACTTAGCTTGGTACCAGCAGAAACCAGGACAGCCTCCTAAGTTGCTCATTTACTGGGCATCTACCCGGGAATCCGGGGTCCCTGACCGATTCAGTGGCAGCGGGTCTGGGACAGATTTCACTCTCACCATCACCAGCCTGCAGGCTGAAGATGTGGCGGTTTATTATTGTCAGCAATATTATAGTCCTCCGCTCACTTTCGGCGGAGGGACCAAGGTGGAGATCAAA
308	IML3695	Post-vax	ADI-67144	IGHV3-33*01	IGHD2-15*01	IGHJ1*01	IGKV1-5*04	IGKJ4*01	7.8	4.7	S2	Yes						GCGAAAGATAGAGGTAGATCATATTCCGGTATGTTGAGTGGTGATCTTGACCAT	AKDRGRSYSGMLSGDLDH	CAACAGTCTAAAATCATCTCTCGCCTCGCT	QQSKIISRLA	CAGGTGCAGCTGGTGGAGTCTGGGGGAGGCGTGGTCCAGCCTGGGGGGTCCCTGAGACTCTCCTGTGCAGCGTCTGGTTTCACCTTCAGCACTTCTGGCATGCACTGGGTCCGCCAGGCTCCAGGCAAGGCGCTGGAGTGGGTGGCAATTCTTTGGCATGATGGAAACAATCAATTCTATGCAGACTCCGTGAAGGGCCGTTTCACCATCTCCAGAGACACTTCCAAGAACACGCTATATCTGCAAATGAGCAGCCTGAGAGCCGAGGACACGGCTATCTATTTCTGTGCGAAAGATAGAGGTAGATCATATTCCGGTATGTTGAGTGGTGATCTTGACCATTGGGGCCAGGGCACCCTGGTCACCGTCTCCTCA	GACATCCAGATGACCCAGTCTCCTTCCACCCTGTCTGCATCTGTAGGAGACAGAGTCACCATCACTTGCCGGGCCAGTCAGGATATCAGTACCTGGTTGGCTTGGTATCAGCAGAAACCAGGGAAAGCCCCTAAGCTCCTGATCTATAAGGCATTTACTTTAGAGACTGGGGTCCCATCAAGGTTCAACGGCAGTGGATCTGGGACAGAATTCACTCTCGCCATCAACAGCCTGCAGCCTGATGATTTTGCAACTTATTACTGCCAACAGTCTAAAATCATCTCTCGCCTCGCTTTCGGCGGAGGGACCAAGGTGGAGATCAAA
309	IML3695	Post-vax	ADI-67145	IGHV3-30-3*01	IGHD1-26*01	IGHJ3*02	IGKV4-1*01	IGKJ1*01	3.8	1	S2	No		>1.0	>1.0			GCGAGGGCGTATGGTGGGAGTTACTATGGCGCTTTTGATATC	ARAYGGSYYGAFDI	CAGCAATATTATAGTACTCCCCCGTACACT	QQYYSTPPYT	CAGGTGCAGCTGGTGGAGTCTGGGGGAGGCGTGGTCCAGCCTGGGAGGTCCCTGAGACTCTCCTGTGCAGCCTCTGGATTCACCTTCACTACCTATGCTATGCACTGGGTCCGCCAGGCTCCAGGCAAGGGGCTGGAGTGGGTGGCACTTATATCATATGATGGCGACAATAAATATTACCCAGACTCCGTGAAGGGCCGATTCACCATCTCCAGAGACAATTCCAAGAACACGCTGTATTTGCAAATGAACAGCCTGACAACTGAGGACACGGCTGTGTATTACTGTGCGAGGGCGTATGGTGGGAGTTACTATGGCGCTTTTGATATCTGGGGCCAAGGGACAATGGTCACCGTCTCTTCA	GACATCGTGATGACCCAGTCTCCAGACTCCCTGGCTGTGTCTCTGGGCGAGAGGGCCACCATCAACTGCAAGTCCAGCCAGAGTGTTTTGTACAACTCCAACAATAAGAACTACTTAGCTTGGTACCAGCAGAAACCAGGACAGCCTCCTAAGCTGCTCATTTACTGGGCATCTACCCGGGAATCCGGGGTCCCTGACCGATTCAGTGGCAGCGGGTCTGGGACAGATTTCACTCTCACCATCAGCAGCCTGCAGGCTGAAGATGTGGCAGTTTATTACTGTCAGCAATATTATAGTACTCCCCCGTACACTTTCGGCCAAGGGACCAAGGTGGAAATCAAA
310	IML3695	Post-vax	ADI-67146	IGHV1-2*02	IGHD3-22*01	IGHJ4*02	IGLV3-1*01	IGLJ2*01	2.1	0.7	S2	No						GCGACCTATTCCCCCTCTGATAGTACTGCTTCTCTACACTCC	ATYSPSDSTASLHS	CAGGCGTGGGACAGTAGCACTGTGGTA	QAWDSSTVV	CAGGTGCAGCTGGTGCAGTCTGGGGCTGAGGTGAAGAAGCCTGGGGCCTCAGTGAAGGTCTCCTGCAAGGCTTCTGGATACACCTTCACCGGCTACTATATGCACTGGGTGCGACAGGCCCCTGGACAAGGGCTTGAGTGGATGGGATGGATCAACCCTAACAGTGGTGGCACAAACTATGCACAGAAGTTTCAGGGCAGGCTCACCATGACCTGGGACACGTCCATCACCACAACCTACATGGACCTGAGCAGGCTGAGACCTGACGACACGGCCGTGTATTACTGTGCGACCTATTCCCCCTCTGATAGTACTGCTTCTCTACACTCCTGGGGCCAAGGAACCCTGGTCACCGTCTCCTCA	TCCTATGAGCTGACTCAGCCACCCTCAGTGTCCGTGTCCCCAGGACAGACAGCCAGCATCACCTGCTCTGGAGATAAATTGGGGGATAAATATGCTTGCTGGTATCAGCAGAAGCCAGGCCAGTCCCCTGTGCTGGTCATTTATCAAGATAGCAAGCGGCCCTCAGGGATCCCTGAGCGATTCTCTGGCTCCAACTCTGGGAACACAGCCACTCTGACCATCAGCGGGACCCAGGCTATGGATGAGGCTGACTATTACTGTCAGGCGTGGGACAGTAGCACTGTGGTATTCGGCGGAGGGACCAAGCTGACCGTCCTA
311	IML3695	Post-vax	ADI-67147	IGHV1-8*01	IGHD3-22*01	IGHJ4*02	IGLV3-25*01	IGLJ2*01	1	2.4	Undefined	No						GCGAGAGGTTACTATGATGGGACGTTCTTCTTTGACTCC	ARGYYDGTFFFDS	CAATCAGCAGACAGCAGTGGTCCTTATGATGTCGTA	QSADSSGPYDVV	CAGGTGCAGCTGGTGCAGTCTGGGGCTGAGGTGAAGAAGCCTGGGGCCTCAGTGAAGGTCTCCTGCAAGGCTTCTGGATACACCTTCACCAGTTATGATATCAACTGGGTGCGACAGGCCACTGGACAAGGGCTTGAGTGGATGGGATGGATGAACCCTAACAGTGCTAACGCAGGCTATGCACAGAAGTTCCAGGGCAGAGTCGCCATGACCAGGAACACCTCCATAAGCACAGCCTACATGGAGCTGAGCAGCCTGAGATCTGAGGACACGGCCGTGTATTACTGTGCGAGAGGTTACTATGATGGGACGTTCTTCTTTGACTCCTGGGGCCAAGGAACCCTGGTCACCGTCTCCTCA	TCCTATGAGCTGATGCAGCCACCCTCGGTGTCAGTGTCCCCAGGACAGACGGCCAGGATCACCTGTTCTGGAGATGCATTGCCAAAGCAATATGCTTATTGGTACCAGCAGAAGCCAGGCCAGGCCCCTGTGGTGGTGATATACAAAGACAATGAGAGGCCCTCAGGGATCCCTGAGCGATTCTCTGGCTCCAGCTCAGGGACAACAGTCACATTGACCATCAGTGGAGTCCAGGCAGAAGACGAGGCTGACTATTACTGTCAATCAGCAGACAGCAGTGGTCCTTATGATGTCGTATTCGGCGGAGGGACCAAGCTGACCGTCCTA
312	IML3695	Post-vax	ADI-67148	IGHV4-39*01	IGHD5-18*01	IGHJ3*02	IGLV2-14*03	IGLJ1*01	3.4	0.7	S2	No						GCGAGACCCGTCTGGATACATCCGAGGAGCGAATACGCTTTTGATATC	ARPVWIHPRSEYAFDI	AGCTCATATACAAGCAGCAGCACTGGCGTC	SSYTSSSTGV	CAGCTGCAGCTGCAGGAGTCGGGCCCAGGACTGGTGAGGCCTTCGGAGACCCTGTCCCTCACCTGCACTGTCTCTGGTGGCTCCATCAGCAGCAGTAGTTACTACTGGGCCTGGATCCGCCAGCCCCCAGGGAAGGGGCTGGAGTGGATTGGGACTATCTATTATGGTGGGAGCACCTACTACAACCCGTCCCTCAAGAGTCGAGTCACCATGTCCGTGGACACGTCCAAGAACCAATTCTCCCTGAAGCTGACTTCTGTGACCGCCGCAGACACGGCTGTGTATTACTGTGCGAGACCCGTCTGGATACATCCGAGGAGCGAATACGCTTTTGATATCTGGGGCCAAGGGACAATGGTCACCGTCTCTTCA	CAGTCTGCCCTGACTCAGCCTGCCTCCGTGTCTGGGTCTCCTGGACAGTCGATCACCATCTCCTGCACTGGAACCAGCAGTGACGTTGGTGGTTATAACTATGTCTCCTGGTACCAACAACACCCAGGCAAAGCCCCCAAACTCATGATTTATGATGTCAATAATCGGCCCTCAGGGGTTTCTAATCGCTTCTCTGGCTCCAAGTCTGGCACCACGGCCTCCCTGACCATCTCTGGGCTCCAGGCTGAGGACGAGGCTGATTATTACTGCAGCTCATATACAAGCAGCAGCACTGGCGTCTTCGGAACTGGGACCAAGGTCACCGTCCTA
313	IML3695	Post-vax	ADI-67149	IGHV1-18*01	IGHD2-15*01	IGHJ1*01	IGLV3-1*01	IGLJ2*01	3.8	2.5	S2	No						GCGAGTCCGGGTAGTGGTGGCAGCCCACTGTTTGGGTTCCAGTAC	ASPGSGGSPLFGFQY	CAGGCGTGGGACAGCAGTACTGTGATA	QAWDSSTVI	CAGGTTCAGCTGGTGCAGTCTGGAGCTGAGGTGAAGAAAGATGGGGCCTCAGTGAAGGTCTCCTGCAAGGCTTCTGGTTACACCTTTACCAACTATGGTTTCAATTGGGTGCGACAGGCCCCTGGACAAGGACTTGAGTGGATGGGATGGATCAACGCTTACAATGGTAACACAAACTACGCACAGAAGCTCCAGGGCAGAGTCACCATGACCACAGACACATCCACGAGCACAGCCTACATGGAGCTGAGGAGCCTGAGATCTGACGACACGGCCGTGTATTATTGTGCGAGTCCGGGTAGTGGTGGCAGCCCACTGTTTGGGTTCCAGTACTGGGGCCAGGGCACCCTGGTCACCGTCTCCTCA	TCCTATGAGCTGACTCAGCCACCCTCAGTGTCCGTGTCCCCAGGACAGACAGCCAGCATCACCTGCTCTGGAGATAAATTGGGAGATAAATATTCTTCCTGGTATCAGCAGAAGCCAGGCCAGTCCCCTGTGTTGGTCATCTATCAAGATCACAAGCGGCCCTCAGGGATCCCTGAGCGATTCTCTGGCTCCAACTCTGGGAACACAGCCACTCTGACCATCAGCGGGACCCAGGCTATGGATGAGGCTGACTATTACTGTCAGGCGTGGGACAGCAGTACTGTGATATTCGGCGGAGGGACCAAGCTGACCGTCCTA
314	IML3695	Post-vax	ADI-67150	IGHV1-18*01	IGHD4-17*01	IGHJ6*02	IGKV2-28*01	IGKJ3*01	5.5	3.3	S2	No						GCGAGTACTACGGTGACTACGGTCTCCTACTACTACGGAATGGACGTC	ASTTVTTVSYYYGMDV	ATGCAAGCTCTACAAACTCCTCGCACT	MQALQTPRT	CAGGTTCAGCTGGTGCAGTCTGGAGCTGAGCTGAAGAAGCCTGGGGCCTCAGTGAAGGTCTCCTGCAAGGCTTCTGGTTACACCTTTACCGGCTATGGTGTCACCTGGGTGCGACAGGCCCCTGGACACGGGCTTGAGTGGATGGGCTGGATCAGCTCTGACAATGTTAGGACAAACTATGCACAGACCCTCCAGGACAGAATCACCATGACCACAGACACATCCACGAGCACAGCCTACATGGAGCTGAGGAGCCTTAGATCTGACGACACGGCCGTGTATTACTGTGCGAGTACTACGGTGACTACGGTCTCCTACTACTACGGAATGGACGTCTGGGGGCAAGGGACCACGGTCACCGTCTCCTCA	GATATTGTGATGACTCAGTCTCCACCCTCCCTGCCCGTCACCCCTGGAGAGCCGGCCTCCATCTCCTGCAGGTCTAGTCAGAGCCTCCTGCATAGTAATGGATTCCACTTTTTGGAATGGTACCTGCAGAGGCCAGGGCAGTCTCCACAGCTCCTGATCTATTTGGGTTCTTATCGGGCCTCCAGGGTCCCTGACAGGTTCAGTGGCAGTGGATCAGGCACAGATTTTACACTCAAAATCAGCAGCGTGGAGGCTGAGGATGTTGGGGTTTATTACTGCATGCAAGCTCTACAAACTCCTCGCACTTTCGGCCCTGGGACCAAAGTGGATATCAAA
315	IML3695	Post-vax	ADI-67151	IGHV3-30*18	IGHD1-26*01	IGHJ3*02	IGKV3-20*01	IGKJ1*01	0.7	2.1	S2	No						GCGAAATCGCATAGTGGGAGCTACTGGGCGGCGTTTGACTTC	AKSHSGSYWAAFDF	CAGCAGTATGGTAGCTCACCGATGTACACT	QQYGSSPMYT	CAGGTGCAGCTGGTGGAGTCTGGGGGAGGCGTGGTCCAGCCTGGGAGGTCCCTGAGACTCTCCTGTGCAGCCTCTGGATTCACCTTCAGTAGCTATGGCATGCACTGGGTCCGCCAGGCTCCAGGCAAGGGGCTGGAGTGGGTGGCAGTTATATCATATGATGGAAGTAATAAATACTATGCAGACTCCGTGAAGGGCCGATTCACCATCTCCAGAGACAATTCCAAGAACACGCTGTATGTGCAAATGAACAGCCTGAGAGCTGAGGACACGGCTGTTTATTACTGTGCGAAATCGCATAGTGGGAGCTACTGGGCGGCGTTTGACTTCTGGGGCCAAGGGACAATGGTCACCGTCTCTTCA	GAAATTGTGTTGACGCAGTCTCCAGGCACCCTGTCTTTGTCTCCAGGGGAAAGAGCCACCCTCTCCTGCAGGGCCAGTCAGAGTGTTAACAGCAACTACTTAGCCTGGTACCAGCAGAAACCTGGCCAGGCTCCCAGGCTCCTCATCTATGGTGCATCCAACAGGGCCACTGGCATCCCTGACAGGTTCAGTGGCAGTGGGTCTGGGACAGACTTCACTCTCACCATCAGCAGACTGGAGCCTGAGGATTTTGCAGTTTATTACTGTCAGCAGTATGGTAGCTCACCGATGTACACTTTCGGCCAAGGGACCAAGGTGGAAATCAAA
316	IML3695	Post-vax	ADI-67152	IGHV1-69*01	IGHD3-22*01	IGHJ4*02	IGKV3-11*01	IGKJ4*01	3.1	2.4	S2	No						GCGAGAATGTACTACAATGAGAACAATGGTCATTACCAAATCGTTGACTAC	ARMYYNENNGHYQIVDY	CAGCAGCGTAGCAACTGGCCTCCGAGGCTCACT	QQRSNWPPRLT	CAGGTGCAGCTGGTGCAGTCTGGGGCTGAGGTGAAGAAGCCTGGGTCCTCGGTGAAGGTCTCCTGCAAGGCTTCTGAAGGCACCTTCAGCAGCTATGCTATCAGCTGGGTGCGACAGGCCCCTGGACAAGGGCTTGAGTGGATGGGAGGGATCATCCCTATCTTTGGCACAGTAAACTTCGCACAGAGGTTCCAGGGCAGAGTCACGCTTACCGCGGACGAATCCACGAACACAGCCCACATGGAGCTGAGCAGCCTGAGATCTGAGGACACGGCCGTATATTACTGTGCGAGAATGTACTACAATGAGAACAATGGTCATTACCAAATCGTTGACTACTGGGGCCAAGGAACCCTGGTCACCGTCTCCTCA	GAAATTGTGTTGACACAGTCTCCAGCCACCCTGTCTTTGTCTCCAGGGGAAAGAGCCACCCTCTCCTGCAGGGCCAGTCAGAGTGTTAGTACTTTCTTAGCCTGGTACCAACAGAAACCTGGCCAGGCTCCCAGGCTCCTCATCTATGATGCATCCAACAGGGCCAGTGGCATCCCAGCCAGGTTCAGTGGCAGTGGGTCTGGGACAGACCTCACTCTCACCATCAGCAGCCTGGAGCCTGAAGATTTTGCAGTTTATTACTGTCAGCAGCGTAGCAACTGGCCTCCGAGGCTCACTTTCGGCGGAGGGACCAAGGTGGAGATCAAA
317	IML3695	Post-vax	ADI-67153	IGHV3-9*01	IGHD3-22*01	IGHJ4*02	IGKV1-39*01	IGKJ5*01	2.7	0.7	S2	No						GCAAAAGGAAGCTACCCCTCATATTACTTTGATAGCAGTGGTTATTCGGACTACTTTGACTCC	AKGSYPSYYFDSSGYSDYFDS	CAACAGAGTTCCAGTACCCCGATCACC	QQSSSTPIT	GAAGTGCAGCTGGTGGAGTCTGGGGGAGGCTTGGTACAGCCTGGCAGGTCCCTGAGACTCTCCTGTGCAGCCTCTGGATTCACCTTTGATGATTATGCCGTTCACTGGGTCCGGCAAGGTCCAGGGAAGGGCCTGGAGTGGGTCTCAAGTATTAGTTGGAATAGTGATAACATAGGCTATGCGGACTCTGTGAAGGGCCGATTCACCATCTCCAGAGACAACGCCAAGAACTCCCTCTATCTGCAAATGAACAGTCTGAGAGCTGAGGACACGGCCTTGTATTTCTGTGCAAAAGGAAGCTACCCCTCATATTACTTTGATAGCAGTGGTTATTCGGACTACTTTGACTCCTGGGGCCAAGGAACCCTGGTCACCGTCTCCTCA	GACATCCAGATGACCCAGTCTCCATCCTCCCTGTCTGCATCTGTAGGAGACAGAGTCACCATCACTTGCCGGGCAAGTCAGAGGATTAGCAGCTATTTAAATTGGTATCAGCAGAAACCAGGGAAAGCCCCTAAGCTCCTGATCTATGCTGCATCCAGTTTGCAAAGTGGGGTCCCATCAAGGTTCAGTGGCAGTGGATCTGGGACAGATTTCACTCTCACCATCAGCAGTCTGCAACCTGAAGATTTTGCAACTTACTACTGTCAACAGAGTTCCAGTACCCCGATCACCTTCGGCCAAGGGACACGACTGGAGATTAAA
318	IML3695	Post-vax	ADI-67154	IGHV3-30*03	IGHD2-2*01	IGHJ5*02	IGLV3-1*02	IGLJ2*01	4.7	2.1	S2	No						GCGAGCGAAGTCTGGTATAGTAGCACCAGTGCCATCGACCCC	ASEVWYSSTSAIDP	CAGGCGTGGGACAGCAGCACTGAGGGCGTGTTGGTGGTA	QAWDSSTEGVLVV	CAGGTGCAGCTGGTGGAGTCTGGGGGAGGCGTGGTCCAGCCTGGGAGGTCCCTGAGACTCTCCTGTGCAGCCTCTGGATTCACCTTCAATGGCATGCACTGGGTCCGCCAGGCTCCAGGCAAGGGCCTGGAGTGGGTGGCATTTATATCATATGATGGAAGTAAGAAATACTATGGAGACTCCGTGAAGGGCCGATTCACCATCTCCAGAGACAATTCCAAGAACACGCTGTATCTGCAAATGAACACCCTGAGAGCTGACGACACGGCTGTCTATTACTGTGCGAGCGAAGTCTGGTATAGTAGCACCAGTGCCATCGACCCCTGGGGCCAGGGAACCCTGGTCACCGTCTCCTCA	TCCTATGAGCTGACTCAGCCACCCTCAGTGTCCGTGTCCCCAGGACAGACAGCCAGCATCACCTGCTCTGGAGATAAGTTGGGGGATAAATATGCTTGCTGGTATCAGCAGAAGGCAGGCCAGTCCCCTGTACTGGTCATCTATCAAGATCACGAGCGGCCCTCAGGGATCCCTGAGCGATTCTCTGGCTCCAACTCTGGGAACACAGCCACTCTGACCATCAGCGGGACCCAGACTATGGATGAGGCTGACTATTACTGTCAGGCGTGGGACAGCAGCACTGAGGGCGTGTTGGTGGTATTCGGCGGAGGGACCAAGCTGACCGTCCTA
319	IML3695	Post-vax	ADI-67155	IGHV1-18*01	IGHD2-15*01	IGHJ1*01	IGLV3-1*01	IGLJ2*01	4.4	4.9	S2	No						GCGAGTCCGGGTAGTGGTGGTAGTCCGCTCTTTGGGTTCCAGTAC	ASPGSGGSPLFGFQY	CAGGCGTGGGACAGCAGCACTGTGGTA	QAWDSSTVV	CAGGTTCAGCTGGTGCAGTCTGGAGCTGAGGTGAAGAGGCCTGGGGCCTCAGTGAAGGTCTCCTGCAAGGCTTCTGGTTACACCTTTAGCAATTATGGTTTCACCTGGGTGCGACAGGCCCCTGGACAAGGGCTTGAGTGGATGGGGTGGATCAGCGCTGACAATGGTAACACAAACTATGCACAGAAACTCCAGGGCAGAGTCACCCTGACCACAGACACATCCACGAGTACAGCCTACATGGAGCTGAGGAGCCTGAGATCTGACGACACGGCCGTGGTTTACTGTGCGAGTCCGGGTAGTGGTGGTAGTCCGCTCTTTGGGTTCCAGTACTGGGGCCAGGGCACCCTGGTCACCGTCTCCTCA	TCCTATGAGCTGACTCAGCCACCCTCAGTGTCCGTGTCCCCAGGACAGACAGCCAGCATCACCTGCTCTGGAGATAAATTGGGAGATAAGTATTCTTCCTGGTATCAGCAGAAGCCAGGCCAGTCCCCTATATTGGTCATCTATCAAGATCATAAGCGGCCCTCAGGGATCGCTGAGCGCTTCTCTGGCTCCAACTCTGGGGACACAGCCACTCTGACCATCAGCGGGGCCCAGGCTATGGATGAGGCTGACTATTACTGTCAGGCGTGGGACAGCAGCACTGTGGTATTCGGCGGAGGGACCAAGCTGACCGTCCTA
320	IML3695	Post-vax	ADI-67156	IGHV1-69*06	IGHD3-22*01	IGHJ6*02	IGKV3-20*01	IGKJ5*01	1	2.1	RBD	No						GCGAGAGGCCCGTATTACTATGATAATAGTGCTTATCCAACAAACTACTACAACTACGGTATGGACGTC	ARGPYYYDNSAYPTNYYNYGMDV	CAGCAGTATGGTAGTTCGCCTATCACC	QQYGSSPIT	CAGGTGCAGCTGGTGCAGTCTGGGGCTGAGGTGAAGAAGCCTGGGTCCTCGGTGAAGGTCTCCTGCAAGGCTTCTGGAGGCACCTTCAGCAGCTATGCTATCAGCTGGGTGCGACAGGCCCCTGGACAAGGGCTTGAGTGGATGGGAGAAATCATCCCTATCTTTGGTACAGCAAACTACGCACAGAAGTTCCAGGGCAGAGTTACGATTACCGCGGACAAATCCACGAGCACAGCCTACATGGAGCTGAGCAGCCTGAGATCTGAGGACACGGCCGTGTATTACTGTGCGAGAGGCCCGTATTACTATGATAATAGTGCTTATCCAACAAACTACTACAACTACGGTATGGACGTCTGGGGGCAAGGGACCACGGTCACCGTCTCCTCA	GAAATTGTGTTGACGCAGTCTCCAGGCACCCTGTCTTTGTCGCCAGGGGAAAGAGCCACCCTCTCCTGCAGGGCCAGACAGAGCGTTAGCAGCAGCTACTTAGCCTGGTACCAGCAGAAACCTGGCCAGGCTCCCCGGCTCCTCATCTATGGTGCATCCAGCAGGGCCACTGGCATCCCAGACAGGTTCAGTGGCAGTGGGTCTGGGACAGACTTCACTCTCACCATCAGCAGACTGGAGCCTGAAGATTTTGCAGTGTATTACTGTCAGCAGTATGGTAGTTCGCCTATCACCTTCGGCCAAGGGACACGACTGGAGATTAAA
321	IML3695	Post-vax	ADI-67157	IGHV3-74*01	IGHD6-19*01	IGHJ6*02	IGLV3-9*01	IGLJ2*01	4.4	2.2	S2	No						TCAAGGGCCGCCGTTGAGAGCAAGTATAGCGGTGGCTGGTACACTTACAACTACTACGCTATGGACGTC	SRAAVESKYSGGWYTYNYYAMDV	CAGGTGTGGGACAGCAGTCATGTGGTA	QVWDSSHVV	GAGGTGCAGCTGGTGGAGTCCGGGGGAGGCTTAGTTCAGCCTGGGGGGTCCCTGAGACTCTCCTGTGCAGCCTCTGGATTCACCTTCAGTAACTACTGGATGCACTGGGTCCGCCAAGCTCCAGGGAAGGGGCTGGTGTGGGTCTCACGTATTCATAGTGATGGGAGTAGTACAAGTTACGCGGACTCCGTGAAGGGCCGATTCACTACCTCCAGAGACAACGCCGACAACACGGTATATCTGCAAATGAACAGTCTGAGAGTCGAGGACACGGCTGTTTATTACTGTTCAAGGGCCGCCGTTGAGAGCAAGTATAGCGGTGGCTGGTACACTTACAACTACTACGCTATGGACGTCTGGGGGCAAGGGACCACGGTCACCGTCTCCTCA	TCCTATGAGCTGACTCAGCCACTCTCAGTGTCAGTCGCCCTGGGACAGACGGCCAGGATTACCTGTGGGGGAAACAACATTGGAAGTAACAATTTGCACTGGTACCAGCAGAAGCCAGGCCAGGCCCCTGTGCTGGTCATTTATAGGGATATTAACCGGCCCTCTGGGATCCCTGAGCGATTCTCTGGCTCCAACTCGGGGAACACGGCCACCCTGACCATCAGCAGAGCCCAAGCCGGGGATGAGGCTGACTATTACTGTCAGGTGTGGGACAGCAGTCATGTGGTATTCGGCGGAGGGACCAAGCTGACCGTCCTA
322	IML3695	Post-vax	ADI-67158	IGHV4-4*02	IGHD4-17*01	IGHJ4*02	IGKV3-15*01	IGKJ5*01	3.8	2.1	NTD	No						GCTCAACGGTGGCACGAATTTCACTCC	AQRWHEFHS	CAGCAGTATGATAACTGGCCTCCGGGGATCACC	QQYDNWPPGIT	CAGGTGCAGCTGCAGGAGTCGGGCCCAGGACTGGTGAAGCCTTCGGGGACCCTGTCCCTCACCTGCGCTGTCTCTGGTGGCTCCATCAGCAGTATTAACTGGTGGAGTTGGGTCCGCCAGCCCCCTGGGAAGGGGCTGGAGTGGATTGGGGAAATCTATCATAGTGGAAGCACCAACTACAACCCGTCCCTCAAGAGTCGAGTCACCATATCAGTCGACAAGTCTAAGAACCTGTTCTCCCTGAACCTTACTTCTGTGAGCGCCGCGGACACGGCCGTGTATTACTGTGCTCAACGGTGGCACGAATTTCACTCCTGGGGCCAAGGAACCCTGGTCACCGTCTCCTCA	GAAATAGTGATGACGCAGTCTCCAGCCACCCTGTCTGTGTCTCCAGGGGAAAGAGCCACCCTCTCCTGCAGGGCCAGTCAGATTCTTGGCAGCAACTTAGCCTGGTACCAGCAGAAACCTGGCCAGGCTCCCAGGCTCCTCATCTCTGGTGCATCCACCAGGGCCACTGGTGTCCCAGCCAGGTTCAGTGGCAGTGGGTCTGGGACAGAGTTCACTCTCACCATCAGCAGCCTGCAGTCTGAAGATTTTGCAGTTTATTACTGTCAGCAGTATGATAACTGGCCTCCGGGGATCACCTTCGGCCAAGGGACACGACTGGAGATTAAA
323	IML3695	Post-vax	ADI-67159	IGHV4-31*03	IGHD2-8*01	IGHJ6*02	IGLV3-1*01	IGLJ1*01	3.7	2.8	Undefined	No						GCGAGAGACCACCTGGTGTCTCAGCAACCCAGATACTACAACTACTGCGGTATGGACGTC	ARDHLVSQQPRYYNYCGMDV	CAGGCGTGGGACAGCAACACGGTC	QAWDSNTV	CAGGTGCAGCTGCAGGAGTCGGGCCCAGGACTGGTGAAGCCTTCACAGACCCTGTCCCTCACCTGCACTGTCTCTGGTGGCTCCATCAGCAGTGGTAGTGACTACTGGAGCTGGATCCGCCAGCACCCAGGGAAGGGCCTGGAGTGGATTGGGTACATCCATTCCAGTGGGGGCACCTACTACAATCCGTCCCTCAAGAGTCGAGTTACCATATCAGTAGACACGTCTCAGAACCAATTCTCCCTGAAGTTGACCTCTGTGACTGCCGCGGACACGGCCGTGTATTATTGTGCGAGAGACCACCTGGTGTCTCAGCAACCCAGATACTACAACTACTGCGGTATGGACGTCTGGGGGCAAGGGACCACGGTCACCGTCTCCTCA	TCCTATGAGCTGACTCAGCCACCCTCAGTGTCCGTGTCCCCAGGACAGACAGCCAGCATCACCTGCTCTGGAGATAAATTGGGAAATAAATATGTTTGCTGGTATCAGCAGAAGCCAGGCCAGTCCCCTGTACTGGTCATCTATCAAGATAGCATCCGGCCCTCAGGGATCCCTGAGCGATTCTCTGCCTCCAACTCTGGGAACACAGCCACTCTGACCATCAGCGGGACCCAGGCTATGGATGAGGCTGACTATTACTGTCAGGCGTGGGACAGCAACACGGTCTTCGGAACTGGGACCAAGGTCACCGTCCTA
324	IML3695	Post-vax	ADI-67160	IGHV3-48*02	IGHD6-19*01	IGHJ4*02	IGKV1-12*01	IGKJ4*01	5.7	3.9	NTD	No						GCGAAAGATCGAGGCAGTGACTACTTTGACTAC	AKDRGSDYFDY	CAACAGGCTAGGTTTTTCCCCCTCACT	QQARFFPLT	GAGGTGCAGCTGGTGGAGTCTGGGGGAGGTTTGGTAGAGCCTGGAGGGTCCCTGAGACTCTCCTGTGCAGCCTCTGGATTCACCTTCAGTGGCTATGACATGACCTGGGTCCGCCAGGCTCCAGGGAGGGGGCTGGAGTGGGTTTCACACATTAGTACTAGTAGTAGTAGAATATACTACGCAGACTCTGTGAAGGGCCGGTTCACCGTCTCCAGAGACAATTCCAAGAACTCACTGTATCTGCAAATGAACAGCCTGAGAGACGAGGACACGGCTGTGTATTATTGTGCGAAAGATCGAGGCAGTGACTACTTTGACTACTGGGGCCAAGGAACCCTGGTCACCGTCTCCTCA	GACATCCAGATGACCCAGTCTCCATCTTTCGTCTCTGCATCTGTAGGAGACAGAGTCACCATCACTTGTCGGGCGAGTCAGGGTATTAGCAACTGGTTAGCCTGGTATCAGCAGAAACCAGGGACAGCCCCTAAGCTCCTGATCTATGCTGCATCCAGTTTGCAAAGTGGGGTCCCATCAAGGTTCAGCGGCAGTGGATCTGGGACAGATTTCACTCTCACCATCAGCAGCCTACAGGCTGAAGATTTTGCAACTTATTATTGTCAACAGGCTAGGTTTTTCCCCCTCACTTTCGGCGGAGGGACCAAGGTGGAGATCAAA
325	IML3695	Post-vax	ADI-67161	IGHV3-33*01	IGHD2-2*01	IGHJ6*02	IGLV3-25*03	IGLJ2*01	1.7	2.8	Undefined	No						GCGAGAGATCAACAGCTGCTCCAACCCGGGGCTCCCTCATACGGTATGGACGTC	ARDQQLLQPGAPSYGMDV	CAATCAGCAGACAGCAGTGGTACTTCCGTA	QSADSSGTSV	CAGGTGCAGCTGGTGGAGTCTGGGGGAGGCGTGGTCCAGCCTGGGAAGTCCCTGAGACTCTCCTGTGCAGCGTCTGGATTCACCTTCAGTACCTATGGCATGCACTGGGTCCGCCAGGCTCCAGGCAAGGGGCTGGAGTGGGTGGCAGTTATATGGTATGATGGAAGTAATAAATACTATGCAGACTCCGTGCAGGGCCGATTCACCATCTCCAGAGACAATCCCAAGAATACGCTGTATCTGCAAATGAACAGCCTGAGAGCCGAGGACACGGCTGTGTATTACTGTGCGAGAGATCAACAGCTGCTCCAACCCGGGGCTCCCTCATACGGTATGGACGTCTGGGGGCAAGGGACCACGGTCACCGTCTCCTCA	TCCTATGAGCTGACACAGCCACCCTCGGTGTCAGTGTCCCCAGGACAGACGGCCAGGATCACCTGCTCTGGAGATGCCTTGTCAAAGCAATTTGCTTACTGGTACCAGCAGAAGCCAGGCCAGGCCCCTTTCCTGGTGATATATAAAGACAGTGAGAGGCCCTCAGGGATCCCTGAGCGATTCTCTGGCTCCAGCTCAGGGACAACAGTCACGTTGACCATCAGTGGAGTCCAGTCAGAAGACGAGGCTGACTATTATTGTCAATCAGCAGACAGCAGTGGTACTTCCGTATTCGGCGGAGGGACCAAGCTGACCGTCCTA
326	IML3695	Post-vax	ADI-67162	IGHV1-69*01	IGHD3-22*01	IGHJ4*02	IGKV3-11*01	IGKJ1*01	5.1	1.7	S2	No						GGGAGGGTAGATCACTATGACAGTAGTGGTTATTACTCTGACTAC	GRVDHYDSSGYYSDY	CAGCAGCGTAGCAACTGGCCTCCAAGGTACACT	QQRSNWPPRYT	CAGGTGCAGCTGGTGCAGTCTGGGGCTGAGGTGAAGAAGCCTGGGTCCTCGGTGAAGGTCTCCTGCAAGGCTTCTGGAGACACCTTCAGAGGCCATGCTTTCATCTGGGTGCGACAGGCCCCTGGACAAGGGCTTGAGTGGATGGGAGGGATCATCCCTATCTTTGGTACAACAAATTACGCACAGAACTTCCAGGGCAGAGTCACGATTACCGCGGACGATTCCAGGACCACAGCGTACATGGAACTGAGCAGCCTGAGATCTGAGGACACGGCCGTGTATTACTGTGGGAGGGTAGATCACTATGACAGTAGTGGTTATTACTCTGACTACTGGGGCCAAGGAACCCTGGTCACCGTCTCCTCA	GAAATTGTGTTGACACAGTCTCCAGCCACCCTGTCTTTGTCTCCCGGGGAAAGAGCCACCCTCTCCTGCAGGGCCAGTCAGAGTGTTAGCAGCCTCTTAGCCTGGTACCAACAGAAACCTGGCCAGGCTCCCAGGCTCCTCATCTATGATGCATCCAACAGGGCCACTGGCATCCCAGCCAGGTTCAGTGGCAGTGGGTCTGGGACAGACTTCACTCTCACCATCAGCAGCCTACAGCCTGAAGATTTTGCAGTTTATTTCTGTCAGCAGCGTAGCAACTGGCCTCCAAGGTACACTTTCGGCCAAGGGACCAAGGTGGAAATCAAA
327	IML3695	Post-vax	ADI-67163	IGHV3-30-3*01	IGHD1-26*01	IGHJ4*02	IGKV1-5*04	IGKJ1*01	4.4	2.4	S2	No						GCGAGACCGTATAGTGGGAACTACTGGGGCTACTTTGACTAC	ARPYSGNYWGYFDY	CAACAGTATAGTACTTTTTCTCCAACG	QQYSTFSPT	CAGGTGCAGCTGGTGGAGTCTGGGGGAGGCGTGGTCCAGCCTGGGAGGTCCCTGAGACTCTCCTGTGCAGCCTCTGGATTCATCTTCAGTAGCTATGCTATGCACTGGGTCCGCCAGGCTCCAGGCAAGGGACTGGAGTGGGTGGCAGTTGTGTCATATGATGGAGACAATAAGTACTACGCAAACTCCGTGAAGGGCCGATTCACCATCTCCAGAGACAATTCCAAGAACACCCTGTCTCTGCAAATGAACAGCCTGAGAATTGAGGACACGGCTGTGTATTACTGCGCGAGACCGTATAGTGGGAACTACTGGGGCTACTTTGACTACTGGGGCCAAGGAACCCTGGTCACCGTCTCCTCA	GACATCCAGATGACCCAGTCTCCTTCCACCCTGTCTGCATCTGTAGGAGACAGCGTCACCATCACTTGCCGGGCCAGTCAGAGTATTACTAGTAGGTTGGCCTGGTATCAGCAGAAACCAGGGAAAGCCCCTAAGCTCCTGATCTATAAGGCATCTAGTTTAGAAAGTGGGGTCCCATCAAGGTTCAGCGGCAGTGGATCTGGGACAGAATTCACTCTCACCATCAGCAGCCTGCAGCCTGATGATTTTGCAACTTATTACTGCCAACAGTATAGTACTTTTTCTCCAACGTTCGGCCAAGGGACCAAGGTGGAAATCAAA
328	IML3695	Post-vax	ADI-67164	IGHV3-30-3*01	IGHD5-18*01	IGHJ4*02	IGLV2-11*01	IGLJ1*01	4.4	2.7	S2	No						GCGAGAGGTCCCGATGGTTACCGTACACCCTTGGACTAC	ARGPDGYRTPLDY			CAGGTGCAGCTGGTGGAGTCTGGGGGAGGCGTGGTCCAGCCTGGGAGGTCCATGAGACTCTCCTGTGCAGCCTCTGGATTCACCTTCAGTACCTATGCTATACACTGGGTCCGCCAGGCTCCAGGCAAGGGGCTGGAGTGGGTAGCAGTTATATCATATTATGGAAACAATAAATACTACGCAGACTCCGTGAAGAGCCGATTCACCATCTCCAGAGACAATTCCGAAAACACAATATATCTGCAAATGAACAGCCTGAGAGCTGAGGACACGGCTATGTATTACTGTGCGAGAGGTCCCGATGGTTACCGTACACCCTTGGACTACTGGGGCCAAGGAACCCTGGTCACCGTCTCCTCA	CAGTCTGCCCTGACTCAGCCTCGCTCAGTGTCCGGGTCTCCTGGACAGTCAGTCACCATCTCCTGCACTGGAACCAGCAGTGATGTTGGTGATTATAACTATGTCTCCTGGTACCAACAGCACCCAGGCAAAGCCCCCAGACTCATGATTTATGATGTCAGTAAGCGGCCCTCAGGGGTCCCTGATCGCTTCTCTGGCTCTAAGTCTGGCAACACGGCCTCCCTGACCATCTCTGGACTCCAGCCTGAGGATGAGGCTGATTATTACTGCTGCTCATATGCAGGCAGCCAAACCTTCGGAACTGGGACCAAGGTCACCGTCCTA
329	IML3695	Post-vax	ADI-67165	IGHV4-39*01	IGHD6-19*01	IGHJ6*02	IGKV3-20*01	IGKJ3*01	3.7	1.7	S2	No						GCGAGACATACCTTGGTGTCCAGCTATAGCAGTGGCTGGTACAATTACCACTACTACGGTATGGACGTC	ARHTLVSSYSSGWYNYHYYGMDV	CAACAGTATGGTAGGTCACCTCCCTTATTCACT	QQYGRSPPLFT	CAGCTGCAGCTGCAGGAGTCGGGCCCAGGACTGGTGAAGCCTTCGGAGACCCTGTCCCTCACCTGCACTGTCTCTGGTGGCTCCATCAGCAGCAGTAGTTACCACTGGGACTGGATCCGCCAGCCCCCAGGGAAGGGGCTGGAATGGATTGGGAGTATCTATTATAGTGAGAGCACCTATTACAACCCGTCCCTCAAGAGTCGAGTCACCATATCCGGAGACACGTCCAAGAATCAGTTCTCCCTGAAGCTGAGCGCTGTGACCGCCGCAGACACGGCTATTTATTACTGTGCGAGACATACCTTGGTGTCCAGCTATAGCAGTGGCTGGTACAATTACCACTACTACGGTATGGACGTCTGGGGGCAAGGGACCACGGTCACCGTCTCCTCA	GAAATTGTGTTGACGCAGTCTCCAGGCACCCTGTCTTTGTCTCCAGGGGAAAGAGCCACCCTCTCCTGCAGGGCCAGTCAGAGTGTTAGCAGCAGCCACTTAGCCTGGTACCAGCAGAAACCTGGCCAGGCTCCCAGGCTCCTCATCTATGGTGCATCTAGCAGGGCCACTGGCATCCCAGACAGGTTCAGTGGCAGTGGGTCTGGGACAGACTTCACTCTCACCATCAGCAGACTGGAGCCTGAAGATTTTGCAGTTTATTACTGTCAACAGTATGGTAGGTCACCTCCCTTATTCACTTTCGGCCCTGGGACCAAAGTGGATATCAAA
330	IML3695	Post-vax	ADI-67166	IGHV3-33*01	IGHD5-18*01	IGHJ4*02	IGLV3-1*01	IGLJ2*01	3.7	2.8	S2	No						GCGAGGGAGGGCGACGCCGCGGAGCTATGGGGGGCTTTTGACTAC	AREGDAAELWGAFDY	CAGGCGTGGGACAGCAGGACTGTGGTA	QAWDSRTVV	CAGGTGCAGCTGGTGGAGTCTGGGGGAGGCGTGGTCCAGCCTGGGAGGTCCCTGAGACTCTCCTGTGCAGCGTCTGGATTCACCTTCAGTAACTATGGCATGCACTGGGTCCGCCAGGCTCCAGGCAAGGGGCTGGAGTGGGTGGCACTTATATGGTTTGATGGAAGTAATAAATACTATGCAGACTCCGTGAAGGGCCGATTCACCATCTCCAGAGAGAAGTCCAACAACACGCTGTATCTGCAAATGGACAACCTGACAGCCGAGGACACGGCTCTGTATTACTGTGCGAGGGAGGGCGACGCCGCGGAGCTATGGGGGGCTTTTGACTACTGGGGCCAAGGAACCCTGGTCACCGTCTCCTCA	TCCTATGAGCTGACTCAGCCACCTTCAGTGTCCGTGTCCCCAGGACAGACAGCCAGCATCACCTGCTCTGGAGATAAATTGGGGGATAAGTATGCTTCCTGGTATCAGCAGAAGCCAGGCCAGTCCCCTGTGTTGGTCATCTATCAAGATACTAATCGGCCCTCAGGGATCCCTGAGCGATTCTCTGGCTCCAACTCTGGGAACACAGCCACTCTGACCATCAGCGGGACCCAGGCTATGGATGAGGCTGACTATTACTGTCAGGCGTGGGACAGCAGGACTGTGGTATTCGGCGGAGGGACCAAGCTGACCGTCCTA
331	IML3695	Post-vax	ADI-67167	IGHV5-51*01	IGHD6-13*01	IGHJ6*02	IGLV3-1*01	IGLJ1*01	2.7	2.1	S2	No						GCGAGACTATCATTTTGCAGCAGCTCATCTAACTACTACTTCTGCGGTATGGACGTC	ARLSFCSSSSNYYFCGMDV	CAGGTGTGGGACAGCAGCACAAGGGTG	QVWDSSTRV	GAGGTGCAGCTGGTGCAGTCTGGAGCAGAGGTGAAAAAGCCCGGGGAGTCTCTGAAGATCTCCTGTAAGGGTTCTGAATACATCTTTACCAACTACTGGATCGGCTGGGTGCGCCAGATGCCCGGGAAAGGCCTGGAGTGGATGGGGATCATCTATCCTGATGACTCTGATACCAGATACAGCCCGTCCTTCCAAGGCCAGGTCACCATCTCAGCCGACAAGTCCATCAGCACCGCCTACCTGCAGTGGGACAGCCTGAGGGCCTCGGACAGCGCCATGTATTACTGTGCGAGACTATCATTTTGCAGCAGCTCATCTAACTACTACTTCTGCGGTATGGACGTCTGGGGGCAAGGGACCACGGTCACCGTCTCCTCA	TCCTATGAGCTGACTCAGCCACCCTCAGTGTCCGTGTCCCCAGGACAGACAGCCAGAATCCCCTGCTCTGGAGATAAATTGGGGGATAAATATGCTTGCTGGTATCAGCAGAAGCCAGGCCAGTCCCCTGTGCTAGTCATCTATCATGATAGCAAGCGGCCCTCAGGGATCCCTGAGCGATTCTCTGGCTCCAACTCTGGGAACACAGCCACTCTGACCATCAGCGGGACCCAGGCTATGGATGAGGCTAACTATTACTGTCAGGTGTGGGACAGCAGCACAAGGGTGTTCGGAACTGGGACCAAGGTCACCGTCCTA
332	IML3695	Post-vax	ADI-67168	IGHV1-18*01	IGHD2-15*01	IGHJ1*01	IGLV3-1*01	IGLJ2*01	3.4	1.8	S2	No						GCGAGTCCGGGTAGTGGTGGCAGCCCACTGTTTGGGTTCCAGTAC	ASPGSGGSPLFGFQY	CAGGCGTGGGACAGCAGCACTGTGATA	QAWDSSTVI	CAGGTTCAGCTGGTGCAGTCTGGAGCTGAGGTGAAGAAACCTGGGGCCTCAGTGAAGGTCTCCTGCAAGGCTTCTGGTTACACCTTTACCAACTATGGTTTCAATTGGGTGCGACAGGCCCCTGGACAAGGACTTGAGTGGATGGGATGGATCAACGCTTACAATGGTAAGACAAACTACGCACAGAAGCTCCAGGGCAGAGTCACCATGACCACAGACACATCCACGAGCACAGCCTACATGGAGCTGAGGAGCCTGAGATCTGACGACACGGCCGTGTATTATTGTGCGAGTCCGGGTAGTGGTGGCAGCCCACTGTTTGGGTTCCAGTACTGGGGCCAGGGCACCCTGGTCACCGTCTCCTCA	TCCTATGAGCTGACTCAGCCACCCTCAGTGTCCGTGTCCCCAGGACAGACAGCCAGCATCACCTGCTCTGGAGATAAATTGGGAGATAAATATTCTTCCTGGTATCAGCAGAAGCCAGGCCAGTCCCCTGTGCTGGTCATCTATCAAGATCACAAGCGGCCCTCAGGGATCCCTGAGCGATTCTCTGGCTCCAACTCTGGGAACACAGCCACTCTGACCATCAGCGGGACCCAGGCTATGGATGAGGCTGACTATTACTGTCAGGCGTGGGACAGCAGCACTGTGATATTCGGCGGAGGGACCAAGCTGACCGTCCTA
333	IML3695	Post-vax	ADI-67169	IGHV4-30-4*01_S8853	IGHD1-7*01	IGHJ6*02	IGKV1-6*01	IGKJ1*01	4.7	5.2	NTD	No						GCGAGAGATAGCTGGAACTACGATGGGGCCGAATACTACGGTTTGGACGTC	ARDSWNYDGAEYYGLDV	CTCCAGGATTACCTATACCCTCGGACG	LQDYLYPRT	CAGGTGCAGCTGCAGGAGTCGGGCCCAGGACTGGTGAAGCCTTCACAGACCCTGTCCCTCACCTGCACTGTCTCTGGTGGCTCCATCAGCAATGGTGATTACTATTGGAGTTGGATCCGCCAGCACCCAGGGAAGGGCCTGGAGTGGATTGGGCACACCTATTACAGTGGGAGCACCTCCTACAATCCGTCCCTCAAGAGTCGAGTAACCATATCAGCAGACACGTCGAAGAACCAGTTCTCCCTGAAGATGAGCTCTGTGACCGCCGCGGACACGGCCGTGTATTATTGTGCGAGAGATAGCTGGAACTACGATGGGGCCGAATACTACGGTTTGGACGTCTGGGGGCAAGGGACCACGGTCACCGTCTCCTCA	GCCATCCAGATGACCCAGTCTCCATCTTCCCTGTCTGCATCTGTAGGAGACAGAGTCACCGTCACTTGCCGGGCAAGTCAGGACATTAGAAATGATTTAGGCTGGTATCAGCAGAAACCAGGGAAAGCCCCTAAGCTCCTGATCTATGCTACATCCAATTTACAAGGTGGAGTCCCATCAAGGTTCAGCGGCAGTGGATTTGGCACAGATTTCACTCTCACCATCAGCAGCCTGCAGCCTGAAGATTCTGCAACTTACTACTGTCTCCAGGATTACCTATACCCTCGGACGTTCGGCCAAGGGACCAAGGTGGAAATCAAA
334	IML3695	Post-vax	ADI-67170	IGHV5-51*01	IGHD5-12*01	IGHJ6*02	IGKV1-33*01	IGKJ3*01	3.4	2.8	S2	No						GCGAGACTCCCCCGTTACAATTACAAATTGGACATC	ARLPRYNYKLDI	CAACAGTATGATAGTCTCCTCTTCTCT	QQYDSLLFS	GAGGTGCAGCTGGTGCAGTCTGGAGCAGAGGTGAAAAAGCCCGGGGAGTCTCTGAAGATCTCCTGTAAGGGTTCTGAATACAGCTTTACCGACTACTGGATCGGCTGGGTGCGCCAGATGCCCGGGAAAGGCCTGGAGTGGATGGGGATCATCTATCCTGGTGACTCTGATACCAGATACAGCCCGTCCTTCGAAGGCCAGGTCACCTTCTCAGTCGACAAGTCCATCAGAACCGCCTTCCTGCAGTGGCGCAGCCTGAAGGCCTCGGACACCGCCATGTATTATTGTGCGAGACTCCCCCGTTACAATTACAAATTGGACATCTGGGGGCAAGGGACCACGGTCACCGTCTCCTCA	GACATCCAGATGACCCAGTCTCCATCCTCCCTGTCTGCATCTGTAGGAGACAGAGTCACCATCACTTGCCATGCGAGTCAGGACATTAGGAAGTATGTAAATTGGTATCAGCAGAAATCAGGGAAAGCCCCTAAGCTCCTGATCTACGATGCATCCAATTTGGAAACAGGGGTCCCATCAAGGTTCAGTGGAAGTGGATCTGGGACAGATTTTACCTTCACCATCAGCAGCCTGCAGCCTGAAGATGTTGCAACATATTACTGTCAACAGTATGATAGTCTCCTCTTCTCTTTCGGCCCTGGGACCAAAGTGGATATCAAA
335	IML3695	Post-vax	ADI-67171	IGHV3-33*01	IGHD1-26*01	IGHJ3*02	IGLV3-25*03	IGLJ3*02	1.4	1	S2	No						GCGAGAGATCCCCCTGGGGTGGGAACTACCGATGATGCTTTTGATATC	ARDPPGVGTTDDAFDI	CAATCAGCAGGCAGCAGTGGTACTTGGGTG	QSAGSSGTWV	CAGGTGCAGCTGGTGGAGTCTGGGGGAGGCGTGGTCCAGCCTGGGAGGTCCCTGAGACTCTCCTGTGCAGCGTCTGGATTCACCTTCAGTAACTATGGCATCCACTGGGTCCGCCAGGCTCCAGGCAAGGGGCTGGAGTGGGTGGCAGTTATATGGTTTGATGGAAGTAATAAATACTATGCAGACTCCGTGAAGGGCCGATTCACCATCTCCAGAGACAATTCCAAGAACACGCTGTATCTACAAATGAACAGCCTGAGAGCCGAGGACACGGCTGTGTATTACTGTGCGAGAGATCCCCCTGGGGTGGGAACTACCGATGATGCTTTTGATATCTGGGGCCAAGGGACAATGGTCACCGTCTCTTCA	TCCTATGAGCTGACACAGCCACCCTCGGTGTCAGTGTCCCCAGGACAGACGGCCAGGATCACCTGCTCTGGAGATGCATTGCCAAACCAATATGCTTATTGGTACCAGCAGAAGCCAGGCCAGGCCCCTGTGTTGGTGATATATAAAGACAGTGAGAGGCCCTCAGGGATCCCTGAGCGATTCTCTGGCTCCAGCTCAGGGACAACAGTCACGTTGACCATCAGTGGAGTCCAGGCAGAAGACGAGGCTGACTATTACTGTCAATCAGCAGGCAGCAGTGGTACTTGGGTGTTCGGCGGAGGGACCAAGCTGACCGTCCTA
336	IML3695	Post-vax	ADI-67172	IGHV1-2*02	IGHD6-19*01	IGHJ6*02	IGLV2-11*01	IGLJ2*01	4.7	1.7	S2	No						GCGAGAGAGGCTGTAGCAGTGGCTGGCTCGTACTCCTACAGTATGGGCGTC	AREAVAVAGSYSYSMGV	TCATATGCAGGCAGCTACACTTTGGTC	SYAGSYTLV	CAGGTGCAGCTGGTGCAGTCTGGGGCTGAGGTGAAGAAGCCTGGGGCCTCAGTGAAGGTCTCCTGCAAGGCTTCTGAATACACCTTCATCGGCTACTATATAAATTGGGTGCGCCAGGCCCCTGGACAAGGGCTTGAGTGGATGGGATGGATCAACCCTAACAGTGGTGTCACAAACTATGCACAGAAGTTTCAGGGCAGGGTCACCATGACGAGGGACACGTCCAACAGTACAGCCTACATGGACCTGAGGAGACTGACATCTGACGACACGGCCGTGTATTACTGTGCGAGAGAGGCTGTAGCAGTGGCTGGCTCGTACTCCTACAGTATGGGCGTCTGGGGGCAAGGGACCACGGTCACCGTCTCCTCA	CAGTCTGCCCTGACTCAGCCTCGCTCAGTGTCCGGGTCTCCTGGACAGTCAGTCACCATCTCCTGCACTGGAACCAGCAGTGATGTTGGTAATTATAACTATGTCTCTTGGTACCAACAACACCCAGGCAAAGCCCCCAAACTCATGATTTATGATGTCACTAAGCGGCCCTCAGGGGTCCCTGATCGCTTCTCTGGCTCCAAGTCTGGCAACACGGCCTCCCTGACCATCTCTGGGCTCCAGGCTGAGGATGAGGCTGATTATTACTGCTGCTCATATGCAGGCAGCTACACTTTGGTCTTCGGCGGAGGGACCAAGCTGACCGTCCTA
337	IML3695	Post-vax	ADI-67173	IGHV3-9*01	IGHD3-22*01	IGHJ4*02	IGKV1-39*01	IGKJ1*01	5.1	2.4	S2	No						GCAAAAGGAGGCTACCCCTCGTATTATTATGATAGTAGTGGTTATTCGGACTACTTTGACTAC	AKGGYPSYYYDSSGYSDYFDY	CAACAGAGTTACAGTACCCCTCAAACT	QQSYSTPQT	GAAGTGCAGCTGGTGGAGTCTGGGGGAGGCTTGCTACAGCCTGGCAGGTCCCTGAGACTCTCGTGTGCAGCCTCTGGATTCACCTTTGATGATTATGCCATGCACTGGGTCCGGCAAGTTCCAGGGAAGGGCCTGGAGTGGGTCTCAACAATTAGTTGGAATAGTGACACCATAGCATATGCGGACTCTGTGAGGGGCCGATTCACCGTCTCCAGAGACAACGCCAAGAACTCCCTGTATCTGCAAATGACCAGTCTGAGAGCTGAGGACACGGCCTTTTATTACTGTGCAAAAGGAGGCTACCCCTCGTATTATTATGATAGTAGTGGTTATTCGGACTACTTTGACTACTGGGGCCAAGGAACCCTGGTCACCGTCTCCTCA	GACATCCAGATGACCCAGTCTCCATCCTCCCTGTCTGCATCTGTGGGAGACAGAGTCACCATCACTTGCCGGGCAAGTCAGAGCATAAGCAGCTATTTAAATTGGTATCAGCAGAAACCAGGGAAAGCCCCTAACCTCCTGATCTATGTCGCATCCAATTTGCAAAGTGGGGTCCCATCAAGGTTCAGTGGCAGTGGATCTGGGACAGATTTCAGTCTCACCATCAGCAGTCTGCAACCTGAAGATTTTGCAACTTACTACTGTCAACAGAGTTACAGTACCCCTCAAACTTTCGGCCAAGGGACCAAGGTGGAAATCAAA
338	IML3695	Post-vax	ADI-67174	IGHV5-51*01	IGHD6-19*01	IGHJ5*02	IGKV3-15*01	IGKJ1*01	3.4	1	S2	No						GCGAGACAAGATTCACGGTATACTAGTGGCTGGTACGTTTTCGGCTGGTTCGACGCC	ARQDSRYTSGWYVFGWFDA	CAGCAGTCTAATAACTGGCCTCGAACC	QQSNNWPRT	GAGGTGCAGCTGGTGCAGTCTGGAGCAGAAATGAAAAAGCCCGGGGAGTCTCTGAACATCTCCTGTAAGGGTTCTGGATACAGCTTTAACAACTACTGGATCGGCTGGGTGCGCCAGATGCCCGGGAAAGGCCTGGAGTGGATGGGGATCATCTATCCTGATGACTCTGATACGAGATACAGCCCGTCCTTCCAAGGCCAGGTCACCATCTCAGTCGACAAGTCCATCAGCACCGCCTACCTGCAGTGGAGCAGCCTGAAGGCCGCGGACACCGCCATGTATTATTGTGCGAGACAAGATTCACGGTATACTAGTGGCTGGTACGTTTTCGGCTGGTTCGACGCCTGGGGCCAAGGAACCCTGGTCACCGTCTCCTCA	GAAATAGTGATGACGCAGTCTCCAGCCACCCTGTCTGTGTCTCCAGGGGAAAGAGCCACCCTCTCCTGCAGGGCCAGTCAGAGTGTTAGTAGCAACTTAGCCTGGTACCAGCAGAAACCTGGCCAGGCTCCCAGGCTCCTCATCTATGGTGCATCCACCAGGGCCACTGGTATCCCAGCCAGGTTCAGTGGCAGTGGGTCTGGGACAGACTTCACTCTCACCATCAGCAGCCTGCAGTCTGAAGATTTTGCAGTTTATTACTGTCAGCAGTCTAATAACTGGCCTCGAACCTTCGGCCAAGGGACCAAGGTGGAAATCAAA
339	IML3695	Post-vax	ADI-67175	IGHV3-30*18	IGHD4-17*01	IGHJ4*02	IGKV1-5*04	IGKJ3*01	5.7	2.5	NTD	No						GCGAAGGATCGCTCTACAGTGTCCGGTGACTACGGGGGAGATTACTTTGACTTC	AKDRSTVSGDYGGDYFDF	CAGCAGTATAATAGTTATCCATTCACT	QQYNSYPFT	CAGGTGCAGCTGGTGGAGTCTGGGGGAGGCGTGGTCCAGCCTGGGAGGTCCCTCAGACTCTCCTGTGCAGCCTCTGGATTCATCTTCAATAACTATGGCATGCACTGGGTCCGCCTGGCTCCAGGCAAGGGGCTGGAGTGGGTGGCATTTATATCAGATGATGCAGGTAATAAATACTATGGAGACTCCGTGAGGGGCCGATTCACCATCTCCAGGGACAATTCCAAGAACACACTGTACCTGCAAATGAACAGCCTGAGAGCTGATGACACGGCTGTGTACTACTGTGCGAAGGATCGCTCTACAGTGTCCGGTGACTACGGGGGAGATTACTTTGACTTCTGGGGCCAAGGAACCCTGGTCACCGTCTCCTCA	GACATCCAGATGACCCAGTCTCCTTCCGCCCTGTCTGCATCTGTAGGAGACAGAGTCACCATCACTTGCCGGGCCAGTCAGAGTATTAGTAGTTGGTTGGCCTGGTATCAGCAGAAACCAGGGAAAGCCCCTAAACTCCTGATCTATAAGTCATCTAATTTAGAAAGTGGGGTCCCATCAAGGTTCAGCGGCAGTGGATCTGGGACAGAATTCACTCTCACCATCAGCAGCCTGCAGTCTGATGATTTTGCAACTTATTACTGCCAGCAGTATAATAGTTATCCATTCACTTTCGGCCCTGGGACCAAAGTGGATATCAAA
340	IML3695	Post-vax	ADI-67176	IGHV1-69*01	IGHD3-10*01	IGHJ4*02	IGKV3-11*01	IGKJ4*01	3.4	2.8	S2	No						GCGGTCCTGGGAGTTCAGTACCACTCTGACTCT	AVLGVQYHSDS	CAGCAACGTAGCAACTGGCCTCCGGCGCTCACT	QQRSNWPPALT	CAGGTGCAGCTGGTGCAGTCTGGGGCTGAGGTGAAGAAGCCTGGGTCCTCGGTGAAGGTCTCCTGCAAGGCTTCTGGAGGCACCTTCACCAGTTACGCTATCACCTGGGTGCGACAGGCCCCTGGACAAGGGCTTGAGTGGATGGGAGGGGTCATCCCTATCTTTGGTACAGCAAACTACGCACAGAAGTTCCAGGGCAGAGTCACTATTACCGCGGACGCATCCACGAGCACAGCCTACATGGACCTGAGCAGCCTGAGTTCTGAGGACACGGCCGTTTATTACTGTGCGGTCCTGGGAGTTCAGTACCACTCTGACTCTTGGGGCCAAGGAACCCTGGTCACCGTCTCCTCA	GAAATTGTGTTGACACAGTCTCCAGCCACCCTGTCTTTGTCTCCAGGGGAAAGAGCCACCCTCTCCTGCAGGGCCAGTCAGAGTGTTAGCAACTTCTTAGCCTGGTACCAACTGAAACCTGGCCAGGCTCCCTGGCTCCTCATCTTTGATGCATCCAACAGGGCCACTGGCGTCCCAGCCAGGTTCAGTGGCAGTGGGTCTGGGACAGACTTCACTCTCACCATCAGCAGCCTGGAGCCTGAAGATTTTGCAGTTTATTACTGTCAGCAACGTAGCAACTGGCCTCCGGCGCTCACTTTCGGCGGAGGGACCAAGGTGGAGATCAAA
341	IML3695	Post-vax	ADI-67177	IGHV3-33*01	IGHD3-16*02	IGHJ6*02	IGLV3-25*03	IGLJ1*01	1.7	2.4	S2	No						GCGAGAGATCAACTATTATGGGGGAACGGTATGGACGTC	ARDQLLWGNGMDV	CAATCAGCAGACAGCAGTAATACTTATAAGGTA	QSADSSNTYKV	CAGGTGCAGCTGGTGGAGTCTGGGGGAGGCGTGGTCCAGCCTGGGAGGTCCCTGAGACTCTCCTGTGCAGCGTCTGGATTCACCTTCAGTACCTATGGCATGCACTGGGTCCGCCAGGCTCCAGGCAAGGGGCTGGAGTGGGTGGCACTTATATGGTATGATGGAAGTAAGAAATACTATGCAGACTCCGTGAAGGGCCGATTCACCATCTCCAGAGACAATTCCAAGAACACGCTGTATCTGCAAATGAACACCCTGAGAGCCGAGGACACGGCTGTGTATTATTGTGCGAGAGATCAACTATTATGGGGGAACGGTATGGACGTCTGGGGGCAAGGGACCACGGTCACCGTCTCCTCA	TCCTATGAGCTGACACAGCCACCCTCGGTGTCAGTGTCCCCAGGACAGACGGCCAGGATCACCTGCTCTGGAGATGCATTGCCAAAGCAATATGCTTATTGGTACCAGCAGAAGCCAGGCCAGGCCCCTGTGGTGGTGATGTATAGAGACAGTGAGAGGCCCTCAGGGATCCCTGAGCGATTCTCTGGCTCCACTTCAGGGACAACAGTCACGTTGACCATCAGTGGAGTCCAGGCAGAAGACGAGGCTGACTATTACTGTCAATCAGCAGACAGCAGTAATACTTATAAGGTATTCGGAACTGGGACCAAGGTCACCGTCCTA
342	IML3695	Post-vax	ADI-67178	IGHV2-70*01	IGHD6-13*01	IGHJ4*02	IGKV3-20*01	IGKJ1*01	1.3	3.8	NTD	No						GCGCGGATACATGCCTATAGCAGCACCTGGCCGAACTTTGACTAC	ARIHAYSSTWPNFDY	CAGCAGTATGCTGACTCACGGTGGACG	QQYADSRWT	CAGGTCACCTTGAGGGAGTCTGGTCCTGCGCTGGTGAAACCCACACAGACCCTCACACTGACCTGCACCTTCTCTGGGTTCTCACTCACCACTAGTGGAATGTGTGTGGGCTGGATCCGTCAGCCCCCAGGGAAGGCCCTGGAGTGGCTTGCACTCATTGATTGGGATGATGATAAATACTACAGCACATCTCTGAAGACCAGGCTCACCATCTCCAAGGACACCTCCAAAAACCAGGTGGTCCTTACAATGACCAACGTGGACCCTGTGGACACAGCCACGTATTACTGTGCGCGGATACATGCCTATAGCAGCACCTGGCCGAACTTTGACTACTGGGGCCAAGGAACCCTGGTCACCGTCTCCTCA	GAAATTGTGTTGACGCAGTCTCCAGGCACCCTGTCTTTGTCTCCAGGGGAAAGAGCCACCCTCTCCTGCAGGGCCAGTCAGAGTGTTTTCAGCGGCTACTTAGCCTGGTTCCAGCAGAGGCCTGGCCAGGCTCCCAGGCTCCTCATCTATGCTGCATCCAGCAGGGCCACTGGCATCCCAGACAGGTTCAGTGGCAGTGGGTCTGGGACAGACTTCACTCTCACCATCAGCGGACTGGAGCCTGAAGATTTTGCAGTGTATTACTGTCAGCAGTATGCTGACTCACGGTGGACGTTCGGCCAAGGGACCAAGGTGGAAATCAAA
343	IML3695	Post-vax	ADI-67179	IGHV1-18*01	IGHD3-3*01	IGHJ5*02	IGKV1-9*01	IGKJ5*01	2.4	1.4	NTD	No						GCGAGAGCCCTGGCGACCCAAGATATCAATTACGATTTTTGGAGTGGTTTGGTCGACCCC	ARALATQDINYDFWSGLVDP	CAACAGCTTAATGATTACCCCCTCACC	QQLNDYPLT	CAGGTTCAGCTGGTGCAGTCTGGAGCTGAGGTGAAGAAGCCTGGGGCCTCAGTGAAGGTCTCCTGCAGGGCTTCTGGTTACACCTTTACCAACTATGGTTTCAGCTGGGTGCGACAGGCCCCTGGACAAGGGCTTCAGTGGATGGGATGGATCAGCGCTTACAGTGGTAACACAAACTATGCACCGAAGCTCCAGGGCAGAGTCACCATGACCACAGACACATCCACGAGCACAGCCTACATGGAGCTGAGGAGCCTGAGATCTGACGACACGGCCGTGTATTATTGTGCGAGAGCCCTGGCGACCCAAGATATCAATTACGATTTTTGGAGTGGTTTGGTCGACCCCTGGGGCCAGGGAACCCTGGTCACCGTCTCCTCA	GACATCCAGTTGACCCAGTCTCCATCCTTCCTGTCTGCATCTGTAGGAGACAGAGTCACCATCACTTGCCGGGCAAGTCAGGACATTAGCAGTTATTTAGCCTGGTATCAGCAAAAACCAGGGAAAGCCCCTAAGCTCCTGATCTATGCTGCATCCACTTTGCAAAGTGGGGTCCCATCAAGGTTCAGCGGCAGTGGATCTGGGACAGAATTCACTCTCACAATCAGCAGCCTGCAGCCTGAAGATTTTGCAACTTATTACTGTCAACAGCTTAATGATTACCCCCTCACCTTCGGCCAAGGGACACGACTGGAGATTAAA
344	IML3695	Post-vax	ADI-67180	IGHV1-3*01	IGHD3-3*01	IGHJ4*02	IGLV3-1*02	IGLJ2*01	7.5	3.6	S2	No						GCGAGAGCCACCGGTTTTACGAACCTTGACTAC	ARATGFTNLDY	CAGGCGTGGGACAACAGCCATGTAGTA	QAWDNSHVV	CAGGTCCAGCTTGTGCAGTCTGGGGCTGAGGTGAAGAAGCCTGGGGCCTCAGTGAAAGTTTCCTGCAAGGCTTCTGGATACACCTTTATTGGTTATCTTATGCAATGGGTGCGCCAGGCCCCCGGACAAAGGCTTGAGTGGATGGGATGGATCAATGATGCCAATGGTGACACAAAATATTCACAGAAGTTCCAGGGCAGAGTCACCATTAACAGGGACAGATCCGCGACCACAACCTACTTGCAACTGACCAGCCTCACATCTGAAGACACGGCTGTGTATTACTGTGCGAGAGCCACCGGTTTTACGAACCTTGACTACTGGGGCCAAGGAACCCTGGTCACCGTCTCCTCA	TCCTATGAGCTGACTCAGCCACCCTCAGTGTCCGTGTCTCCAGGACAGACAGCCAGCATCCTCTGCTCTGGAGATAAATTGGGGGATAAATATGTTTGCTGGTATCAGCAGAAGCCAGGCCAGTCCCCCGTCCTGGTCATGTATCAAGATACCGAGCGGCCCTCAGGGATCCCTGAGCGATTCTCTGGCTCCAACTCTGGGAACACAGCCACTTTGACCATCAGCGGGACCCAGGCTATGGATGAGGCTGACTATTACTGTCAGGCGTGGGACAACAGCCATGTAGTATTCGGCGGAGGGACCAAGCTGACCGTCCTA
345	IML3695	Post-vax	ADI-67181	IGHV3-9*01	IGHD6-13*01	IGHJ4*02	IGLV2-14*03	IGLJ1*01	2.7	1.7	S2	No						GTAAAATCGGGGGGAAGGGGAGCAGCAGCTGCCTTCTTTGACTAC	VKSGGRGAAAAFFDY	AGCTCATATGCAAGCAGCAGTACTCTTTATGTC	SSYASSSTLYV	GAAGTGCAGCTGGTGGAGTCTGGGGGAGGCTTGGTACAGCCTGGCAGGTCCCTGAGACTCTCCTGTGCAGCCTCTGGATTCACTTTTGATGATTATGCCATGCACTGGGTCCGGCAAGCTCCAGGGAAGGGCCTGGAGTGGGTCTCAAGTATTAGTTGGATAAGTGGTAGCATAGGCTATGCGGACTCTGTGAAGGGCCGATTCACCATCTCCAGAGACAACGCCAAGAACTCCCTGTATCTGCAAATGGCCCGTCTGAGAGCTGAGGACACGGCCTTGTATTACTGTGTAAAATCGGGGGGAAGGGGAGCAGCAGCTGCCTTCTTTGACTACTGGGGCCAAGGAACCCTGGTCACCGTCTCCTCA	CAGTCTGCCCTGACTCAGCCTGCCTCCGTGTCTGGGTCTCCTGGACAGTCGATCACCATCTCCTGCACTGGAACCAGCAGTGACGTTGGTAGTTATAACTATGTCTCCTGGTACCAACAACACCCAGGCAAAGCCCCCAAACTCATGATTTATGATGTCAGTTATCGGCCCTCAGGGGTTTCTTATCGCTTCTCTGGCTCCAAGTCTGGCAACACGGCCTCCCTGACCATCTCTGGGCTCCAGGCTGAGGACGAGGCTGATTATTACTGCAGCTCATATGCAAGCAGCAGTACTCTTTATGTCTTCGGAACTGGGACCAAGGTCACCGTCCTA
346	IML3695	Post-vax	ADI-67182	IGHV3-21*01	IGHD3-3*01	IGHJ6*02	IGLV3-1*01	IGLJ1*01	3.4	2.1	S2	No						GCGAGGTCTCTTGTGTCGATTTCTGGAGTGGTTCCGCATGGTTCACATTGGGATCGCTACTACGGTTTGGACGTC	ARSLVSISGVVPHGSHWDRYYGLDV	CAGGCGTGGGACAGCAACACTCATAATTATGTC	QAWDSNTHNYV	GAGGTGCAGCTGGTGGAGTCTGGGGGAGGCCTGGTCAAGCCTGGGGGGTCCCTGAGAGTCTCCTGTGCAGCCTCTGGATTCACCTTCAGTAGTTATACCATGAACTGGGTCCGCCAGGCTCCAGGGAAGGGGCTGGAGTGGGTCTCATCCATTAGTAGTAGTGGTAATTACATATATTATGCAGACTCAATGAAGGGCCGATTCACCATCTCCAGAGACAACGCCAAGAACTCTCTGTATCTGCAAATGAACAGCCTGAGAGCCGAGGACACGGCTGTGTATTTCTGTGCGAGGTCTCTTGTGTCGATTTCTGGAGTGGTTCCGCATGGTTCACATTGGGATCGCTACTACGGTTTGGACGTCTGGGGGCAAGGGACCACGGTCACCGTCTCCTCA	TCCTATGAGCTGACTCAGCCACCCTCAGTGTCCGTGTCCCCAGGACAGACAGCCAGCATCACCTGCTCTGGAGATAATTTGGGGGATAAATATGCTTGCTGGTATCAGCAGAAGCCAGGCCAGTCCCCTCTACTGGTCATCTATCAAGATACCAAGCGGCCCTCAGGGATCCCTGAGCGATTCTCTGGCTCCAACTCTGGGAACACAGCCACTCTGACCATCGGCGGGACCCAGGCTATGGATGAGGCTGACTATTACTGTCAGGCGTGGGACAGCAACACTCATAATTATGTCTTCGGAACTGGGACCAAGGTCACCGTCCTA
347	IML3695	Post-vax	ADI-67183	IGHV4-39*01	IGHD3-3*01	IGHJ4*02	IGLV2-8*01	IGLJ2*01	3.7	3.7	RBD	No	0.007221	0.0029	0.0027	0.0008	0.003034	GCGGTGGGGGGGGTACGATTTTTTGAGTGGTTATTACAGTTTGACTAC	AVGGVRFFEWLLQFDY	AGCTCATATGCAGGCAGCAGCAGTTTGATA	SSYAGSSSLI	CAGCTGCAGCTGCAGGAGTCGGGCCCAGGACTGATGAAGCCTTCGGAGACCCTGTCCCTCACCTGCAATGTCTCTGGTGGCTCCATCAGCAGTAGTGATTACTACTGGGGCTGGATCCGCCAGCCCCCAGGGAAGGGGCTGGAGTGGATTGGGAGTTACTATTATGTTGGGAGCACCTACTACAACCCGTCCCTCAAGAGTCGAGTCACCATATCCGTAGACACGTCCAAGAGTCAGTTCTCCCTGAAGCTGACCTCTGTGACCGCCGCAGACACGGCTGTGTATTACTGTGCGGTGGGGGGGGTACGATTTTTTGAGTGGTTATTACAGTTTGACTACTGGGGCCAAGGAACCCTGGTCACCGTCTCCTCA	CAGTCTGCCCTGACTCAGCCTCCCTCCGCGTCCGGGTCTCCTGGACAGTCAGTCACCATCTCCTGCACTGGAACCAGCAGTGACGTTGGAGCTTCTAATTATGTCTCCTGGTACCAACAACACCCAGGCAAAGCCCCCAAACTCATGATTTATGAGCTCACTAAGCGGCCCTCAGGGGTCCCTGATCGCTTCTCTGGCTCCAAGTCTGGCAACACGGCCTCCCTGACCGTCTCTGGGCTCCAGGCTGCGGATGAGGCTCATTATTACTGCAGCTCATATGCAGGCAGCAGCAGTTTGATATTCGGCGGAGGGACCAAGCTGACCGTCCTA
348	IML3695	Post-vax	ADI-67184	IGHV1-46*01	IGHD5-12*01	IGHJ2*01	IGLV3-19*01	IGLJ1*01	5.5	1.7	NTD	No						GCGAGGGCCCCCCTCGTGTGGCTACGATATTTGGGATACTACTTTGACTTG	ARAPLVWLRYLGYYFDL	AACTCCCGGGACAGCAGTGATGACCATCATTATGTC	NSRDSSDDHHYV	CAGGTGCAGCTGGTGCAGTCTGGGGCTGAGGTGGAGGAGCCTGGGGCCTCAGTGAAGATGTCCTGCAAGGCATCTGGATACAGCTTCACCAGCTACTATATGCACTGGGTGCGACAGGCCCCTGGACAAGGGCTTGAGTGGATGGGGATGATCAACCTTAATGGTGGGACTACAACCTACGCACAGAAGTTCCAGGGCAGAGTCACCATGACCAGGGACACGTCCACGAGGACAGCCTACATGCAGCTGAGCAGCCTGAGATCTGAGGACACGGCCGTGTATTACTGTGCGAGGGCCCCCCTCGTGTGGCTACGATATTTGGGATACTACTTTGACTTGTGGGGCCGTGGCACCCTGGTCACTGTCTCCTCA	TCTTCTGAGCTGACTCAGGACCCTGCTGTGTCTGTGGCCTTGGGACAGACAGTCAGGGTCACATGCCAAGGAGACAGCCTCAGAAGCTATTATACAAGCTGGTACCAGCAGAAGCCAGGACAGGCCCCTGTACTTGTCATCTATGGTAAAAATAACCGGCCCTCAGGGATCCCAGACCGATTCTCTGGCTCCAGCTCAGGAAACACAGCTTCCTTGACCATCACTGGGGCTCAGGCGGAAGATGAGGCTGACTATTACTGTAACTCCCGGGACAGCAGTGATGACCATCATTATGTCTTCGGAACTGGGACCAAGGTCACCGTCCTA
349	IML3695	Post-vax	ADI-67185	IGHV3-30*03	IGHD6-19*01	IGHJ4*02	IGLV3-1*01	IGLJ2*01	5.7	6.7	S2	No						GCGAGAGATCCAGCAGCAGTGGCTGGCCCTCTTGACTAC	ARDPAAVAGPLDY	CAGGCGTGGGCCAGCAACACTGTGGTA	QAWASNTVV	CAGGTGCAGCTGGTGGAGTCTGGGGGAGGCGTGGTCCAGCCTGGGAGGTCCCTGAGACTCTCCTGTGTAGTCTCTGGATTCACCTTCAGTAGCTACGCTCTGCACTGGGTCCGCCAGGCTCCAGGCAAGGGGCTGGAGTGGGTGGCAGTTATATCACATGATGGAAGTAGTAAATTTTATGGAGACTCCGTGAAGGGCCGATTCACCATCTCCAGAGACAATTCCGAGAACACGGTGTATCTGCAAATGAATAACCTGAGAACTGAGGACGCGGCTGTGTATTACTGTGCGAGAGATCCAGCAGCAGTGGCTGGCCCTCTTGACTACTGGGGCCAAGGAACCCTGGTCACCGTCTCCTCA	TCCTATGAGCTGACTCAGCCACCCTCAGTGTCCGTGTCCCCAGGACAGACAGCCAGCATCACCTGCTCTGGAAATAAATTGGGGAATAAATATGTTTCCTGGTATCAACATAAGCCAGGCCAGTCCCCTCTATTGGTCATCTATCAGGATACCAAGCGGCCCTCGGGGATCCCTGAGCGATTTTCTGGCTCCAGCTCTGGGAACACAGCCACTCTGACCATCAGCGAGGCCCAGGCTTTGGATGAGGCTGACTATTACTGTCAGGCGTGGGCCAGCAACACTGTGGTATTCGGCGGAGGGACCAAGCTGACCGTCCTA
350	IML3695	Post-vax	ADI-67186	IGHV1-24*01	IGHD6-13*01	IGHJ6*02	IGKV2-24*01	IGKJ1*01	2	2.3	NTD	No						GCAACAGCGACGGCAGTACTTGGTACGCGGGAAAATTACTCCTACTACTATGGTATGGACGTC	ATATAVLGTRENYSYYYGMDV	ATGCAAGTTACACAATTTCCGTATACT	MQVTQFPYT	CAGGTCCAGCTGGTACAGTCTGGGGCTGAGGTGAAGAAGCCTGGGGCCTCAGTGAAGGTCTCCTGCAAGGTTTCCGAATACACCCTCAGTGAATTATCCATACACTGGGTGCGACAGGCTCCTGGAAAAGGGCTTGAGTGGATGGGAGGTTTTGATCCTAAAGATGGTGAAACAATCTACGCACAGAAGTTCCAGGGCAGAGTCACCATGACCGAGGACACATCTATAGACACAGCCTACATGGAGCTGAGCAGCCTGAGATCTGAGGACACGGCCGTGTATCACTGTGCAACAGCGACGGCAGTACTTGGTACGCGGGAAAATTACTCCTACTACTATGGTATGGACGTCTGGGGGCAAGGGACCACGGTCACCGTCTCCTCA	GATATTGTGATGACCCAGACTCCACTCTCCTCACCTGTCACCCTTGGACAGCCGGCCTCCATCTCCTGCAGGTCTAGTCAGAGCCTCGTACACAGTGATGGAAACACCTACTTGAGTTGGCTTCAACAGAGGCCAGGCCAGCCTCCAAGACTCCTATTTTATAAGATTTCTAACCGGTTCTCTGGGGTCCCAGACAGGTTCAGTGGCAGTGGGGCGGGGACAGATTTCACACTGAAAATCAGCAGGGTGGAAGCTGAGGATGTCGGGCTTTATTACTGCATGCAAGTTACACAATTTCCGTATACTTTCGGCCAAGGGACCAAGGTGGAAATCAAA
351	IML3695	Post-vax	ADI-67187	IGHV3-9*01	IGHD3-22*01	IGHJ4*02	IGKV1-39*01	IGKJ1*01	1.7	3.5	S2	No						GCAAAAGGAGGCTACCCCTCGTATTACTATGATAGTAGTGGTTATTCGGACTACTTTGAAAAC	AKGGYPSYYYDSSGYSDYFEN	CAACAGAGTTACAGTACCCCTCAAACT	QQSYSTPQT	GAAGTGCAGCTGGTGGAGTCTGGGGGAGGCTTGGTACAGCCTGGCAGGTCCCTGAGACTCTCCTGTGCAGCCTCTGGATTCACCTTTGATGATTATGCCATGCACTGGGTCCGACAAGCTCCAGGGAAGGGCCTGGAGTGGGTCTCAGGTATTAGTTGGAATAGTGGTAGCATAGGGTATGTGGACTCTGTGAAGGGCCGATTCACCATCTCCAGAGACAACGCCAAGAACTCCCTGTACTTGCAAATGAACAGTCTGAGAGCTGAGGACACGGCCTTGTATTACTGTGCAAAAGGAGGCTACCCCTCGTATTACTATGATAGTAGTGGTTATTCGGACTACTTTGAAAACTGGGGCCAGGGCACCCTGGTCACCGTCTCCTCA	GACATCCAGATGACCCAGTCTCCATCCTCCCTGTCTGCATCTGTAGGAGACAGAGTCACCATCACTTGCCGGGCAAGTCAGAGCATTAGCAGCTATTTAAATTGGTATCAACAAAAACCAGGGAAAGCCCCTAAGCTCCTGATATATGTCGCATCCAATTTACAAAGTGGGGTCCCATCAAGGTTCAGTGGCAGTGGATCTGGGACAGGTTTCACTCTCACCATCAGCAGTCTGCAACCTGAAGATTTTGGAAGTTACTACTGTCAACAGAGTTACAGTACCCCTCAAACTTTCGGCCAAGGGACCAAGGTGGAAATCAAA
352	IML3695	Post-vax	ADI-67188	IGHV3-30*03	IGHD2-8*01	IGHJ4*02	IGLV3-25*03	IGLJ2*01	3	2.8	S2	No						GCGAGAGAATCGCAATGGGACGTACTGGGGAATGGTTTTGACTAC	ARESQWDVLGNGFDY	CAATCAGGAGACAGCAATACTAATTATCATGTGGTA	QSGDSNTNYHVV	CAGGTGCAGCTGGTGGAGTCTGGGGGAGGCGTGGTCCAGCCTGGGAAGTCCCTGAGACTCTCCTGCGCAGCCTCTGGATTCACCTTCAGTACCTATGGCATACACTGGGTCCGCCAGGCTCCAGGCAAGGGGCTGGAGTGGGTGGCACTTATATCATATGATGGAAGTAATAAGCACTATGCAGACTCCGTGAAGGGCCGATTCACCATCTCCAGAGACAATTCCAAGAACACGCTGTCTCTGCAAATGAACAGCCTGAGAGCTGAGGACACGGCTGTCTATTACTGTGCGAGAGAATCGCAATGGGACGTACTGGGGAATGGTTTTGACTACTGGGGCCAAGGAACCCTGGTCACCGTCTCCTCA	TCCTATGAGCTGACACAGCCACCCTCGGTGTCAGTGTCCCCAGGACAGACGGCCAGGATCACCTGCTCTGGAGATGCATTGCCAAAGCAATATGCTTATTGGTACCGGCAGAAGCCAGGCCAGGCCCCTGTGCTGGTGATATATAAAGACACTGAGAGGCCCTCAGGGATCCCTGAGCGATTCTCTGGCTCCACCTCAGGGACAACAGTCACGTTGACCATCAGTGGAGTCCAGGCAGAAGACGAGGCTGACTATTACTGTCAATCAGGAGACAGCAATACTAATTATCATGTGGTATTCGGCGGAGGGACCAAGCTGACCGTCCTA
353	IML3695	Post-vax	ADI-67189	IGHV3-30*03	IGHD4-17*01	IGHJ4*02	IGKV4-1*01	IGKJ4*01	4.4	1.3	RBD	No		0.2776	>1.0	>1.0		GCGAGAGACTACGGTGACTACGCGGCCTTTGACTCC	ARDYGDYAAFDS	CAGCAATATTATAGTACTCCTCTCACT	QQYYSTPLT	CAGGTGCAGCTGGTGGAGTCTGGGGGAGGCGTGGTCCAGCCTGGGAGGTCCCTGAGACTCTCCTGTGCAGCCTCTGGATTCACCTTCAATAACTATGGCATGCACTGGGTCCGCCAGGCTCCAGGCAAGGGGCTGGAGTGGGTGGCACTTATATCATATGATGGAAGTCTTAAACACTATGCAGACTCCGTGACGGGCCGATTCACCATCTCCAGAGACAGTTCCAAGAGCACGCTGTTTCTGCAGATGAACAGTCTGAGACCTGAGGACACGGCTGTGTATTACTGTGCGAGAGACTACGGTGACTACGCGGCCTTTGACTCCTGGGGCCAAGGAACCCTGGTCACCGTCTCCTCA	GACATCGTGATGACCCAGTCTCCAGACTCCCTGGCTGTGTCTCTGGGCGAGAGGGCCACCATCAACTGCAAGTCCAGCCAGAGTGTTTTATACAGCTCCAACAATAAGAACTACTTAACTTGGTACCAGCAAAAACCAGGACAGCCTCCTAAGCTGCTCATTTACTGGGCATCTACCCGGGAATCCGGGGTCTCTGACCGATTCAGTGGCAGCGGGTCTGGGACAGATTTCACTCTCACAATCAGCAGCCTGCAGGCTGAAGATGTGGCAGTTTATTACTGTCAGCAATATTATAGTACTCCTCTCACTTTCGGCGGAGGGACCAAGGTGGAGATCAAA
354	IML3695	Post-vax	ADI-67190	IGHV3-30*03	IGHD3-3*01	IGHJ4*02	IGLV3-25*01	IGLJ3*02	2.4	4.2	Undefined	No						GCGAGAGAGGGGCTTTACGATTTTTGGAGTGCCAACCCCTTTGACTAC	AREGLYDFWSANPFDY	CAATCAGCAGGCAGCAGTGGTACTTCTTGGGTG	QSAGSSGTSWV	CAGGTGCAGCTGGTGGAGTCTGGGGGAGGCGTGGTCCAGCCTGGGAGGTCCCTGAGACTCTCCTGTGCAGCCTCTGGATTCACCTTCAATAAGTATGGCATGCACTGGGTCCGCCAGGCTCCAGGCAAGGGGCTGGAGTGGGTGGCAGTTATATCATATGATGGAAGTAAAAAATACTATGCAGACTCCGTGAAGGGCCGATTCACCATCTCCAGAGACTATTCCAAGAACACGCTGTATCTGCAAATGAACAGCCTGAGACCTGAGGACACGGCTGTGTTTTACTGTGCGAGAGAGGGGCTTTACGATTTTTGGAGTGCCAACCCCTTTGACTACTGGGGCCAAGGAACCCTGGTCACCGTCTCCTCA	TCCTATGAGCTGATGCAGCCACCCTCGGTGTCAGTGTCCCCAGGACAGACGGCCAGGATCACCTGCTCTGGAGAGGCCTTGCCAAAGCAATATGCTTATTGGTACCAGCAGAAGCCAGGCCAGGCCCCTACATTGGCAATATATAAAGACAATGAGAGGCCCTCAGGGATCCCTGAGCGATTCTCTGGCTCCAGCTCAGGGACAACAGTCACATTGACCATCAGTGGAGTCCAGGCAGAAGACGAGGCTGACTATTACTGTCAATCAGCAGGCAGCAGTGGTACTTCTTGGGTGTTCGGCGGAGGGACCAAGCTGACCGTCCTA
355	IML3695	Post-vax	ADI-67191	IGHV1-18*01	IGHD3-22*01	IGHJ6*02	IGLV3-25*03	IGLJ2*01	3.4	2.4	Undefined	No						GCGAGGATAGAAGACAGCACAAAAATGTTGGACTTCTACTACGGTATGGACGTC	ARIEDSTKMLDFYYGMDV	CAATCAATAGACAGCAGTAGTACTTATGTAATA	QSIDSSSTYVI	CAGGTTCAGCTGGTGCAGTCTGGAGCTGAGGTGAAGAAGCCTGGGGCCTCAGTGAAGGTCTCCTGCAAGGCTTCTGGTTACACCTTTAGTAGCTATGGTATCAGCTGGGTGCGACAGGCCCCTGGACAAGGGCTTGAGTGGATGGGATGGATCAGCGCTTACAGTGGTAACACAAACTCTGCACAAAAAATCCAGGGCAGAGTCACCATGACCACAGACACATCCACGAGCACAGCCTATATGGAGCTGAGGAGCCTGAGATCCGACGACACGGCCGTATATTACTGTGCGAGGATAGAAGACAGCACAAAAATGTTGGACTTCTACTACGGTATGGACGTCTGGGGGCAAGGGACCACGGTCACCGTCTCCTCA	TCCTATGAGCTGACACAGCCACCCTCGGTGTCAGTGTCCCCAGGACAGACGGCCAGGATCGCCTGCTCTGGAGATGCATTGCCAAAGCAATATGTTTATTGGTACCAGCAGAAGCCAGGCCAGGCCCCTGTGGTGGTGATATATAAAGTCAGTGAGAGGCCCTCAGGGATCCCTGAGCGATTCTCTGGCTCCAGCTCAGGGACAACAGTCACGTTGACCATCAGTGGAGTCCAGGCAGAAGACGAGGCTGACTATTACTGTCAATCAATAGACAGCAGTAGTACTTATGTAATATTCGGCGGAGGGACCAAGCTGACCGTCCTA
356	IML3695	Post-vax	ADI-67192	IGHV1-2*02	IGHD2-8*01	IGHJ5*02	IGKV2-28*01	IGKJ4*01	4.1	4	S2	No						GCGAGAGCGAGGGTGTACGGGGTTTATGCTCTAAACTGGTTCGACCCC	ARARVYGVYALNWFDP	ATGCAGGCTCTACAAACTCCTCTCACT	MQALQTPLT	CAGGTGCAGCTGGTGCAGTCTGGGGCTGAGGTGAAGAAGCCTGGGGCCTCAGTGAAGGTCTCCTGCAAGGCTTCTGGATACGCCTTCACCGGCTACTATATGCACTGGGTGCGACAGGCCCCTGGGCAAGGGCTTGAGTGGATGGGGTGGATCAACCCTAACAGTGGTGACACAAACTATGCACAGAACTTCCAGGGCAGGATCACCATGACCAGGGACACGTCCATCACCACAGTCTACATGGAGCTGAGCAGACTGAAATCTGACGACACGGCCATGTATTACTGTGCGAGAGCGAGGGTGTACGGGGTTTATGCTCTAAACTGGTTCGACCCCTGGGGCCAGGGAACCCTGGTCACCGTCTCCTCA	GATATTGTGATGACTCAGTCTCCACTCTCCCTGCCCGTCACCCCTGGAGAGCCGGCCTCCATCTCCTGCAGGTCTAGTCAGAGCCTCGTGGATAGTAATGGAAACAACTGTTTGGATTGGTACCTACAGAAGCCAGGGCAGTCTCCACAGGTCCTGATCCATTTGGCTTATAATCGGGCCTCCGGGGTCCCTGACAGGTTCAGTGGCAGTGGCTCAGGCACAGATTTTACACTGAAAATCAGCAGAGTGGAGGCTGAGGATGTTGGGGTTTATTATTGCATGCAGGCTCTACAAACTCCTCTCACTTTCGGCGGAGGGACCAAGGTGGAGATCAAA
357	IML3695	Post-vax	ADI-67193	IGHV3-23*01	IGHD5-18*01	IGHJ5*02	IGKV3-11*01	IGKJ4*01	2.4	0.7	NTD	No						GCGAAAGGGGATACAGCTATGGTCCCGTACAACTGGTTCGACCCC	AKGDTAMVPYNWFDP	CAGCACCGTAGCAACTGGCCCCTCACT	QHRSNWPLT	GAGGTGCAGCTGTTGGAGTCTGGGGGAGGCTTGGTACAGCCTGGGGGGTCCCTGAGACTCTCCTGTGCAGCCTCTGGATTCACCTTTAGCAGCTATGCCATGAGCTGGGGCCGCCAGGCTCCAGGGAAGGGGCTGGAGTGGGTCTCTTCTATTAGTAATAGTGGTGGTAGCACATACTACGCAGACTCCGTGAAGGGCCGGTTCACTATCTCCAGAGACAATTCCAAGAACGCGCTGTATCTGCAAATGAACAGCCTGAGAGCCGAGGACACGGCCGTATATTACTGTGCGAAAGGGGATACAGCTATGGTCCCGTACAACTGGTTCGACCCCTGGGGCCAGGGAACCCTGGTCACCGTCTCCTCA	GAAATTGTGTTGACACAGTCTCCAGCCACCCTGTCTTTGTCTCCAGGGGAAAGAGCCACCCTCTCCTGCAGGGCCAGTCAGAGTGTTAGCAGCTACTTAGCCTGGTACCAACAGAAACCTGGCCAGGCTCCCAGGCTCCTCATCTATGATGCATCCAACAAGGCCACTGGCATCCCAGCCAGGTTCAGTGGCAGTGGGTCTGGGACAGACTTCACTCTCACCATCAGCAGCCTAGAGCCTGAAGATTTTGCAGTTTATTACTGTCAGCACCGTAGCAACTGGCCCCTCACTTTCGGCGGAGGGACCAAGGTGGAGATCAAA
358	IML3695	Post-vax	ADI-67194	IGHV3-30-3*01	IGHD1-26*01	IGHJ5*02	IGKV3-20*01	IGKJ5*01	4.1	1.7	S2	No						GCGAGACCCGTTGGTGGGAACTACTTGAAGTGGTTCGACCCC	ARPVGGNYLKWFDP	CAGCAGTATGGTAGCTCACCTATCACC	QQYGSSPIT	CAGGTGCAGCTGGTGGAGTCTGGGGGAGGCGTGGTCCAGCCTGGGGGGTCCCTGAGACTCTCCTGTGCAGCCTCTGGATTCACCTTCAGTACCTATGGTATCCATTGGGTCCGCCAGGCTCCAGGCAAGGGGCTGGAGTGGGTGGCAGTTATATCATATGATGGAATGAATAAATACTACGCAGACTCCGTGAAGGGCCGATTCACCATCTCCAGAGACAATTCCAAGAACACGCTATATCTGCAAATGAACAGCCTGAGACCTGAGGACACGGCTATTTACTACTGTGCGAGACCCGTTGGTGGGAACTACTTGAAGTGGTTCGACCCCTGGGGCCAGGGAACCCTGGTCACCGTCTCCTCA	GAAATTGTGTTGACGCAGTCTCCAGGCACCCTGTCTTTGTCTCCAGGGGAGAGAGCCACCCTCTCCTGCAGGGCCAGTCAGAGTGTTGGCAGCAGCTACTTAGCCTGGTACCAGCAGAAACCTGGCCAGGCTCCCAGGCTCCTCATCTATGGTGCATCCAACAGGGCCAGTGGCATCCCAGACAGGTTCAGTGGCAGTGGGTCTGGGACAGACTTCACTCTCACCATCAGCAGACTGGAGCCTGAAGATTTTGCAGTGTATTCCTGTCAGCAGTATGGTAGCTCACCTATCACCTTCGGCCAAGGGACACGACTGGAGATTAAA
359	IML3695	Post-vax	ADI-67195	IGHV4-31*03	IGHD6-13*01	IGHJ6*02	IGKV3-20*01	IGKJ1*01	4.4	3.1	S2	No						GCGAGAGTGTCGGCAGCAGCAGGTGGCGGTATGGACGTC	ARVSAAAGGGMDV	CAGCACTACGGTACCTCACGCCTGTACACT	QHYGTSRLYT	CAGGTGCAGCTGCAGGAGTCGGGCCCAGGACTGGTGAAGCCTTCACAGACCCTGTCCCTCACCTGCACTGTCTCTGGTGGCTCCATCAGCAGTGCTGGTTACTATTGGAGTTGGATCCGCCAGTACCCAGGGAAGGGCCTGGAGTGGATTGGGTACATATATTACAGTGGGAGCACCTACTACAACCCGTCCCTCAAGAGTCGGCTGACCATATCAGTAGACACGTCTAGGAACCAGTTCTCCCTGAACCTGAACTCTGTGACTGCCGCGGACACGGCCGTCTATTATTGTGCGAGAGTGTCGGCAGCAGCAGGTGGCGGTATGGACGTCTGGGGGCAAGGGACCACGGTCACCGTCTCCTCA	GAAATTGTGTTGACGCAGTCTCCAGGCACCCTGTCTTTGTCTCCAGGGGAAAGAGTCACCCTCTCCTGCAGGGCCAGTCAGAGGATTAGCAGCGGCTTCTTAGCCTGGTACCAGCAGAAACCTGGCCAGGCTCCCAGGCTCCTCATCTATGGTGCATCCAGCAGGGCCACTGGCGTCCCAGACAGGTTCAGTGGCAGTGGGTCTGGGACAGACTTCACTCTCACCATCAGCAGACTGGAGCCTGAAGATTTTGCAGTGTATTACTGTCAGCACTACGGTACCTCACGCCTGTACACTTTCGGCCAAGGGACCAAGGTGGAAATCAAA
360	IML3695	Post-vax	ADI-67196	IGHV3-30*03	IGHD4-17*01	IGHJ4*02	IGKV4-1*01	IGKJ3*01	4.4	1	Undefined	No						GCGAGAGACTACGGTGACTACGCAGCCCTTGACTAC	ARDYGDYAALDY	CAGCAATATTATACTACTCTCGTCACT	QQYYTTLVT	CAGGTGCAGCTGGTGGAGTCTGGGGGAGGCGTGGTCCAGCCTGGGAGGTCCCTGAGACTCTCCTGTGCAGCCTCTGGATTCACCTTCAGTAATTATGGCATGCACTGGGTCCGCCAGGTTCCAGGCAAGGGGCTGGAGTGGGTGACAGTTACATCATATGATGGAAGTATTCAATACTATGCAGACTCCGTGAAGGGCCGATTCACCATCTCCAGAGACAATTCCAAGAACGCGCTGTATCTGCAAATGAACAGCCTGACAACTGAGGACACGGCTATCTACTACTGTGCGAGAGACTACGGTGACTACGCAGCCCTTGACTACTGGGGCCAAGGAACCCTGGTCACCGTCTCCTCA	GACATCGTGATGACCCAGTCTCCAGACTCCCTGGCTGTGTCTCTGGGCGAGAGGGCCACCATCAACTGCAAGTCCACCCAGAGTGTTTTTTACAGCTCCAACAATAAGAACTACTTAGCTTGGTACCAGCAGAAACCAGGACAGCCTCCTAAGCTGCTCATTTACTGGGCATCTACCCGGGAATCCGGGGTCCCTGACCGATTCAGTGGCAGCGGGTCTGGGACAGATTTCACTCTCACCATCAGCAGCCTGCAGGCTGAAGATGTGGCAGTTTATTACTGTCAGCAATATTATACTACTCTCGTCACTTTCGGCCCTGGGACCAAAGTGGATATCAAA
361	IML3695	Post-vax	ADI-67198	IGHV3-33*01	IGHD1-1*01	IGHJ6*02	IGLV3-25*03	IGLJ3*02	2	2.8	S2	No						GCGAGAGAGAGGGACTGGAACGACGGGGGCGGTATGGACGTT	ARERDWNDGGGMDV	CAATCAGCAGCCAGCAGTGGTACTTGGGTG	QSAASSGTWV	CAGGTGCAGCTGGTGGAGTCTGGGGGAGGCGTGGTCCAGCCTGGGAGGTCCCTGAGACTCTCCTGTGCAGCGTCTGGACTCACCTTCAGTAACTATGGCATGCACTGGGTCCGCCAGGCTCCAGGCAAGGGGCTGGAGTGGGTGGCAGTCATATGGTTTGATGGAAGTAATAAATATTATGCAGACTCCGTGAAGGGCCGATTCACCATCTCCAGAGACAATTCCAAGAACACGCTGTATCTGCAAATGAACAGCCTGAGAGTCGAGGACACGGCTGTGTATTACTGTGCGAGAGAGAGGGACTGGAACGACGGGGGCGGTATGGACGTTTGGGGGCAAGGGACCACGGTCACCGTCTCCTCA	TCCTATGAGCTGACACAGCCACCCTCGGTGTCAGTGTCCCCAGGGCAGACGGCCAGGATCACCTGCTCTGGAGATGCATTGCCAAACCAATATGCTTATTGGTACCAGCAGAAGCCAGGCCAGGCCCCTGTATTGGTGATATATAGGGACAGTGAGAGGCCCTCAGGGATCCCTGAGCGATTCTCTGGCTCCACCTCAGGGACAACAGTCACGTTGACCATCAGTGGAGTCCAGGCAGAAGACGAGGCTGACTATTACTGTCAATCAGCAGCCAGCAGTGGTACTTGGGTGTTCGGCGGAGGGACCAAGCTGACCGTCCTA
362	IML3695	Post-vax	ADI-67199	IGHV5-51*01	IGHD5-12*01	IGHJ6*02	IGLV3-1*01	IGLJ2*01	3.4	6.3	S2	No						GCGAGACGTGGATATAGTTTTGGTTCTGACTATTATGGTTTGGACGTC	ARRGYSFGSDYYGLDV	CAGGCGTGGAACAGCAGCACTCCATGGGTA	QAWNSSTPWV	GAGGTGCAGCTGGTGCAGTCTGGAGCAGAGGTGAAAAAGCCCGGGGAGTCTCTGAAGATCTCCTGTAAGGGTTCTGGATACAGTTTTACCACCCACTGGATCGGCTGGGTGCGCCAGATGCCCGGGAAAGGCCTGGAGTGGATGGGGATCATCTTTCCTTATGACTCTGATACTAGATATAGCCCGTCCTTCCAAGGCCTGGTCACCATCTCAGCCGACAAGTCCACCAGCACCGCCTACCTGCAGTGGAGCAGCCTGAAGGCCTCGGACACCGCCATGTATTACTGTGCGAGACGTGGATATAGTTTTGGTTCTGACTATTATGGTTTGGACGTCTGGGGGCAAGGGACCACGGTCACCGTCTCCTCA	TCCTATGAGCTGACTCAGCCACCCTCAGTGTCCGTGTTCCCAGGGCAGATAGCCAGCATCACCTGCTCTGGAGATAAATTGGGAAATAAATATGTTTCCTGGTATCGACAGAAGGCAGGCCAGTCCCCTGCTCTGGTCATCTATCAAGATAACCAGCGGCCCTCAGGGATCCCTGAGCGATTCTCTGGCTCCAACTCTGGGAACACAGCCACTCTGACCATCAGCGGGACCCAAGCTATGGATGAGGCTGCCTATTACTGTCAGGCGTGGAACAGCAGCACTCCATGGGTATTCGGCGGAGGGACCAAGCTGACCGTCCTA
363	IML3695	Post-vax	ADI-67200	IGHV3-48*01	IGHD2-21*02	IGHJ4*02	IGLV3-1*01	IGLJ2*01	5.7	1.8	S2	No						GCGCGAGATCTCGTGGTGGTAACTCCGGGTTTTGACTAC	ARDLVVVTPGFDY	CAGGCGTGGGACAGCACCACTGCAGTA	QAWDSTTAV	GAGGTGCAGCTGGTGGAGTCTGGGGGAGGCTTGGTACAGCCGGGGGGGTCCCTGAGACTCTCCTGTGAAGCCTCTGGATTCACCTTCAGTATCTACGGCATGAACTGGGTCCGCCAGACTCCAGGGAAGGGACTGGAGTGGATTTCATACATCAGTAGTAGTAGTCGTGCCATGTACTACGCAGACTCTGTGAAGGGCCGATTCACCATCTCCAGGGACGATGCCAAAAACTCACTGTATCTACAAATGAACAGCCTGAGAGCCGAGGACACGGCTGTGTATTACTGTGCGCGAGATCTCGTGGTGGTAACTCCGGGTTTTGACTACTGGGGCCAAGGAACCCTGGTCACCGTCTCCTCA	TCCTATGAGCTGACTCAGCCACCCTCAGTGTCCGTGTCCCCAGGACAGACAGCCAGCATCACCTGCTCTGGAGATAAATTGGGGGATAGATATGCTTGCTGGTATCAGCAGAAGCCAGACCAGTCCCCTGTGCTGGTCATCTATGAAGATACCAAGCGGCCCTCAGGGATCCCTGAGCGATTCTCTGGCTCCAACTCTGGGAACACAGCCACTCTGACCATCAGCGGGACCCAGGCTATGGATGAGGCTGACTATTACTGTCAGGCGTGGGACAGCACCACTGCAGTATTCGGCGGAGGGACCAAGCTGACCGTCCTA
364	IML3695	Post-vax	ADI-67201	IGHV3-15*01	IGHD3-22*01	IGHJ6*02	IGLV3-25*03	IGLJ2*01	3.7	2.5	S2	No						ACCACAGGAAACACGGATTATCATGATAGTAGTGCTTATTATCACCGTTTCGGTATGGACGTC	TTGNTDYHDSSAYYHRFGMDV	CAATCAGCAGACAGCAATGATACTCCTGTGGTA	QSADSNDTPVV	GAGGTGCAGCTGGTGGAGTCTGGGGGAGGCTTGGTAAAGCCGGGGGGCTCCCTTAGACTCTCCTGTGCAGCCTCTGGATTCACTTTCAGTAGTGCCTGGATGACCTGGGTCCGCCAGGCTCCAGGGAAGGGGCTGGAGTGGGTTGGCCGTATTAAAAGCAAAACTGATGGTGGGACAACAGACTACGCTACACCCGTGAAAGACAGATTCACCATCTCAAGAGATGATTTAAAAAACACGCTGTTTCTGCAAATGAACAGCCTGAACACCGAGGACACAGCCGTATATTACTGTACCACAGGAAACACGGATTATCATGATAGTAGTGCTTATTATCACCGTTTCGGTATGGACGTCTGGGGGCAAGGGACCACGGTCACCGTCTCCTCA	TCCTATGAGCTGACACAGCCACCCTCGGTGTCAGTGTCCCCAGGACAGACGGCCAGGATCACCTGCTCTGGAGATGCATTGTCAAAGCAATATGTTTATTGGTACCAGCAGAAGCCAGGCCAGGCCCCTGTGTTGGTGATATATAAAGACAGTCAGAGGCCCTCAGGGATCCCTGAGCGATTCTCTGGCTCCAGCTCAGGGACAACAGTCACGTTGACCATCAGTGGAGTCCCGGCAGAAGACGAGGCTGACTATTACTGTCAATCAGCAGACAGCAATGATACTCCTGTGGTATTCGGCGGAGGGACCAAGCTGACCGTCCTA
365	IML3695	Post-vax	ADI-67202	IGHV3-30-3*01	IGHD1-26*01	IGHJ4*02	IGKV3-11*01	IGKJ4*01	4.1	1	S2	No						GCGAGAGGTCTGGGTGGGAACTACTACTACTTTGACTAC	ARGLGGNYYYFDY	CAGCAACGTAGCAACTGGCCTCTCACT	QQRSNWPLT	CAGGTGCAGCTGGTGGAGTCTGGGGGAGGCGTGGTCCGGCCTGGGAGGTCCCTGCGACTCTCCTGTGCAGCCTCTGAATTCACCTTCAATACATATGCTATGCACTGGGTCCGCCAGGCTCCAGGCAAGGGGCTGGAGTGGGTGGCACTTATATCATATGATGGAAGCAATAAATACTACGCAGACTCCGTGAAGGGCCGATTCACCATCTCCCGAGACAATTCCAAGAACTCGCTGTCTCTGCAAATGAACACCCTGAGAGCTGAGGACACGGCTGTTTATTACTGTGCGAGAGGTCTGGGTGGGAACTACTACTACTTTGACTACTGGGGCCAAGGAACCCTGGTCACCGTCTCCTCA	GAAATTGTGTTGACACAGTCTCCAGCCACCCTGTCTTTGTCTCCGGGGGAAAGAGCCACCCTCTCCTGCAGGGCCAGTCAGAGTATTAGCAGCTACTTAGCCTGGTACCAACAGAAACCTGGCCAGGCTCCCAGGCTCCTCATCTATGATGCATCCAACAGGGCCACTGGCATCCCAGCCAGGTTCAGTGGCAGTGGGTCTGGGACAGACTTCACTCTCACCATCAGCAGCCTAGAGCCTGAAGATTTTGCAGTTTATTACTGTCAGCAACGTAGCAACTGGCCTCTCACTTTCGGCGGAGGGACCAAGGTGGAGATCAAA
366	IML3695	Post-vax	ADI-67203	IGHV4-31*03	IGHD6-13*01	IGHJ6*02	IGKV3-20*01	IGKJ1*01	3.4	1.4	S2	No						GCGAGAGTTTCGGTAGCAGCAGCTGGCGGTATGGACGTC	ARVSVAAAGGMDV	CAGCACTATGGTAGCTCACCCCTGTACACT	QHYGSSPLYT	CAGGTGCAGCTGCAGGAGTCGGGCCCAGGACTGGTGAAGCCTTCACAGACCCTGTCCCTCACCTGCTCTGTCTCTGGTGGCTCCATCAGCAGTGGTGCTTACTACTGGAGCTGGATCCGCCAGCACCCAGGGAAGGGCCTGGAGTGGATTGGGTACATCTATTACAGTGGGAGCACCATCTACAACCCGTCCCTCAAGAGTCGAGTTACCATATCACTAGACACGTCTAAGAACCAGTTCTCCCTGAACCTGAACTCTGTGACTTCCGCGGACACGGCCGTGTATACCTGTGCGAGAGTTTCGGTAGCAGCAGCTGGCGGTATGGACGTCTGGGGGCAAGGGACCACGGTCACCGTCTCCTCA	GAAATTGTGTTGACGCAGTCTCCAGGCACCCTGTCTTTGTCTCCAGGGGAAAGAGCCACCCTCTCCTGCAGGGCCAGTCAGAGTGTTAGCAGCAGCTACTTAGCCTGGTACCAGCAGAAACCTGGCCAGGCTCCCAGGCTCCTCATGTATGGTGCATCCAGCAGGGCCACTGGCATCCCAGACCGGTTCAGTGGCAGTGGGTCTGGGACAGACTTCACTCTCACCATCAGCAGACTGGAGCCTGAAGATTTGGCAGTGTATTACTGTCAGCACTATGGTAGCTCACCCCTGTACACTTTCGGCCAAGGGACCAAGGTGGAAATCAAA
367	IML3695	Post-vax	ADI-67204	IGHV4-39*01	IGHD6-19*01	IGHJ6*02	IGKV3-20*01	IGKJ2*01	5.7	3.1	S2	No						ACGAGACATACCTTGGAGTCCATGTATAGTAATGGCTGGTACACCTACCACTCGTACGGAATGGACGTC	TRHTLESMYSNGWYTYHSYGMDV	CAGCAGTATGGTACCTCACCTCCCTTATTCACT	QQYGTSPPLFT	CAGCTGCAGCTGCAGGAGTCGGGCCCAAGACTGCTGAAGCCTTCGGAGACCCTGTCCCTCACCTGCACTGTCTCTGGTGACTCCATCAGCAGCAGTGGTTACTACTGGGACTGGATCCGCCAGCCCCCAGGGAAGGGGCTGGAGTGGATTGGGACTATCTCTTATAGTGGGAGCACCTACTACAGTCCGTCCCTCAAGAGTCGAGTCACCATATCCGTAGACACGCCCAAGAACCAGTTCTTCCTGAAGCTGAATTCTGTGACCGCCGCAGACACGGCTGTCTTTTACTGTACGAGACATACCTTGGAGTCCATGTATAGTAATGGCTGGTACACCTACCACTCGTACGGAATGGACGTCTGGGGGCAAGGGACCACGGTCACCGTCTCCTCA	GAAATTGTGTTGACGCAGTCTCCAGGCACCCTGTCTCTGTCTCCAGGGGAGAGAGCCACCCTCTCCTGCAGGGCCAGTCAGAGTGTTAATAGCAGGTACTTCGCCTGGTACCAGCAGAAACCTGGCCAGGCTCCCAGGCTCCTCATCTATGGTGCATCCAGCAGGGCCACTGGCATCCCAGACAGGTTCAGTGGCAGTGGGTCTGGGACAGACTTCACTCTCACCATCAGCAGACTGGAACCAGAAGATTTTGCAGTGTATTACTGTCAGCAGTATGGTACCTCACCTCCCTTATTCACTTTTGGCCAGGGGACCAAGCTGGAGATCAAA
368	IML3695	Post-vax	ADI-67205	IGHV3-30*03	IGHD6-13*01	IGHJ4*02	IGLV3-25*03	IGLJ3*02	4.1	2.1	Undefined	No						GCGAGGGAAGCAGAAGCTGGTACGGGAGGATTTGACTAC	AREAEAGTGGFDY	CAATCAGCAGACAGCGGTGGTACTTATCATTGGGTG	QSADSGGTYHWV	CAGGTGCAGCTGGTGGAGTCTGGGGGAGGCGTGGTCCAGCCTGGGAGGTCCCTGAGACTCTCCTGTGCAGCCTCTGGATTCACCTTCAGTACCTACGGCATGCACTGGGTCCGCCAGGCTCCAGGCAAGGGGCTGGAGTGGGTGGCAGTTGTGTCATATGATGGAAGTACTAAATCTCATGCAGACTCCGTGAAGGGCCGATTCACCATCTCCAGAGACAAGTCCAAGAACACGCTGTATCTTCAAATGGACAGCCTGAGAGCTGAGGACACGGCTGTGTATTACTGTGCGAGGGAAGCAGAAGCTGGTACGGGAGGATTTGACTACTGGGGCCAAGGAACCCTGGTCACCGTCTCCTCA	TCCTATGAGCTGACACAGCCACCCTCGGTGTCAGTGTCCCCAGGACAGACGGCCAGGATCACCTGCTCTGGAGATGCATTGCCAAAACAATATGCCTATTGGTACCAGCAGAAGCCAGGCCAGGCCCCTGTGTTGGTGATATATAAAGACAGTGAGAGGCCCTCAGGGATCCCTGAGCGATTTTCTGGCTCCAGCTCAGGGACAACAGTCACGTTGACCATCACTGGAGTCCAGGCAGAAGACGAGGCTGACTATTACTGTCAATCAGCAGACAGCGGTGGTACTTATCATTGGGTGTTCGGCGGAGGGACCAAGCTGACCGTCCTA
369	IML3695	Post-vax	ADI-67206	IGHV4-59*01	IGHD6-19*01	IGHJ3*02	IGKV3-20*01	IGKJ1*01	1.7	1.8	S2	No						GCGAGAGCACCCCTATCCCAATATAGCAGTGGCTGGTACAAGTTTATTTATGCTTTTGATATC	ARAPLSQYSSGWYKFIYAFDI	CAGCAGTATGGTATCTCATTGTGGACG	QQYGISLWT	CAGGTGCAGCTGCAGGAGTCGGGCCCAGGACTGGTGAAGCCTTCGGAGACCCTGTCCCTCACCTGCACTGTCTCTGGTGGCTCCATCAGTACTTACCACTGGAGCTGGATCCGGCAGCCCCCAGGGAAGGGACTGGAGTGGATTGGGCATATCTATTACAGTGGGAGCACCAACTACAACCCCTCCCTCAAGAGTCGAGTCACCATATCAGAAGACACGTCCAAGAACCAGTTCTCCCTGAACCTGAGCTCTGTGACCGCTGCGGACACGGCCGTGTATTACTGTGCGAGAGCACCCCTATCCCAATATAGCAGTGGCTGGTACAAGTTTATTTATGCTTTTGATATCTGGGGCCAAGGGACAATGGTCACCGTCTCTTCA	GAAATTGTGTTGACGCAGTCTCCAGACACCCTGTCTTTGTCTCCAGGGGAGAGAGTCACCCTCTCCTGCAGGGCCAGTCAGAGTGTTAGCAGCACCTACTTAGCCTGGTACCAGCAGAAACCTGGCCAGGCTCCCAGGCTCCTCATCTATGGTGCATCCAGCAGGGCCACTGGCATCCCAGACAGGTTCAGTGGCAGTGGGTCTGGGACAGACTTCACTCTCACCATCAGCAGACTGGAGCCTGAAGATTTTGCAGTGTATTACTGTCAGCAGTATGGTATCTCATTGTGGACGTTCGGCCAAGGGACCAAGGTGGAAATCAAA
370	IML3695	Post-vax	ADI-67207	IGHV1-69*01	IGHD5-12*01	IGHJ4*02	IGKV3-11*01	IGKJ4*01	4.1	3.1	S2	No						GCGAGAGTGGAAGGCTACGATGCTGGCGGTCTCCTTGACTAC	ARVEGYDAGGLLDY	CAGTACCGTAGCAACTGGCCTCCGAGGCTCACT	QYRSNWPPRLT	CAGGTGCAGCTGGTGCAGTCTGGGGCTGAGGTGAAGAAGCCTGGGTCCTCGGTGAAGGTCTCCTGCAAGACTTCTGGAGGCACCCTCAACAGCCATGCTATCAGTTGGGTGCGACAGGCCCCTGGACAAGGGCTTGAGTGGATGGGAGGGATCATCCCTGTATTTAGTACAACAAACTACGCACAGAAATTCCAGGGCAGAGTCACGATTACCGCGGACGAATCCACGAGCACAGCCTACATGGAACTGAGCAGCCTGAGATCTGACGACACGGCCGTGTATTACTGTGCGAGAGTGGAAGGCTACGATGCTGGCGGTCTCCTTGACTACTGGGGCCAAGGAACCCTGGTCACCGTCTCCTCA	GAAATTGTGTTGACACAGTCTCCAGCCACCCTGTCTTTGTCTCCAGGGGAAAGAGCCACCCTCTCCTGCAGGGCCAGTCAGACTGTCAGCAACTTCTTAGCCTGGTACCAACAGAGACCTGGCCAGGCTCCCAGGCTCCTCATCTATGATGCTTCCAACAGGGCCACTGGCATCCCAGCCAGGTTCAGTGGCAGTGGGTCTGGGACAGACTTCACTCTCACCATCAGCAGCCTAGAGCCTGAGGATTTTGCAGTTTATTACTGTCAGTACCGTAGCAACTGGCCTCCGAGGCTCACTTTCGGCGGAGGGACCAAGGTGGAGATCAAA
371	IML3695	Post-vax	ADI-67208	IGHV4-39*01	IGHD3-10*01	IGHJ4*02	IGLV2-14*03	IGLJ3*02	2.4	3.1	S2	No						GCGACTGAGCGTCTTACTGTGCTTCGCGGAGCTATTTTTGGCTTTGACTAC	ATERLTVLRGAIFGFDY	AGCTCATATACAGGCGACAGCACTTGGGTG	SSYTGDSTWV	CAGCTGCAGCTGCAGGAGTCGGGCCCAGGACTGGTGAAGCCTTCGGAGACCCTGTCCCTCACCTGCACTGTCTCTGGTGGCTCCATCAGCAGTAGTGGATACTACTGGGGCTGGATCCGCCAGCCCCCCGGGAAGGGGCTGGAGTGGATTGGGAGTATCTATTATAGTGGGACCACCTACTACAACCCGTCCCTCAAGAGTCGAGTCACCATATCCGTAGACACGTCCAAGAACCAGTTCTCCCTGAGGCTGAGCTCTGTCACCGCCGCAGACACGGCTGTATATTACTGTGCGACTGAGCGTCTTACTGTGCTTCGCGGAGCTATTTTTGGCTTTGACTACTGGGGCCAAGGAACCCTGGTCACCGTCTCCTCA	CAGTCTGCCCTGACTCAGCCTGCCTCCGTGTCTGCGTCTCCTGGACAGTCGATCACCATCTCCTGCACTGGAACCAGCAGTGACGTTGGTCGTTATAACTATGTCTCCTGGTACCAACAACACCCAGGCAAAGCCCCCAAACTCATGATTTCTGATGTCAATAATCGGCCCTCAGGGGTTTCTAATCGCTTCTCTGGCTCCAAGTCTGGCAACACGGCCTCCCTGACCATCTCTGACCTCCAGGCTGAGGACGAGGCTGATTATTACTGCAGCTCATATACAGGCGACAGCACTTGGGTGTTCGGCGGAGGGACCAAGCTGACCGTCCTA
372	IML3695	Post-vax	ADI-67209	IGHV3-21*01	IGHD5-12*01	IGHJ6*02	IGKV3-15*01	IGKJ1*01	1.4	1.7	Undefined	No		>1.0				GCGAGAGTCCAAAGAGTGGCTACGCACATACCCGACTACTACCACTACGCTATGGACGTC	ARVQRVATHIPDYYHYAMDV	CAGCAGTATAATAACTGGCCTCCGTGGACG	QQYNNWPPWT	GAGGTGCAGCTGGTGGAGTCTGGGGGAGGCCTGGTCAAGCCTGGGGGGTCCCTGAGACTCTCCTGTGCAGCCTCTGGATTCATCTTCAGTACCTATAGCATGGACTGGGTCCGCCAGGCTCCAGGGAAGGGGCTGGAGTGGGTCTCATCCATTAGTAGTAGTAGTAGTTTCATATACTACGCAGACTCAGTGAAGGGCCGATTCACCATCTCCAGAGACAACGCCAAGAACTCACTGTATCTGCAAATGAACAGCCTGAGAGCCGAGGACACGGCTGTGTATTACTGTGCGAGAGTCCAAAGAGTGGCTACGCACATACCCGACTACTACCACTACGCTATGGACGTCTGGGGGCAAGGGACCACGGTCACCGTCTCCTCA	GAAATAGTGATGACGCAGTCTCCAGCCACCCTGTCTGTGTCTCCAGGGGAAAGAGCCACCCTCTCCTGCAGGGCCAGTCAGAGCGTTAGCAGCAACTTAGCCTGGTACCAGCAGAAACCTGGCCAGGCTCCCAGGCTCCTCATCTATGGTGCATTTACCGGGGCCACTGGTATCCCAGCCAGGTTCAGTGGCAGTGGGTCTGGGACAGCGTTCACTCTCACCATCAGCAGCCTGCAGTCTGAAGATTTTGCAGTTTATTACTGTCAGCAGTATAATAACTGGCCTCCGTGGACGTTCGGCCAAGGGACCAAGGTGGAAATCAAA
373	IML3695	Post-vax	ADI-67210	IGHV3-33*01	IGHD3-22*01	IGHJ2*01	IGLV3-25*03	IGLJ3*02	4.4	4.2	Undefined	No						GCGAGAGATCACCCCCCTTTGTCCGATGACTATGACTCGCTCGACCGC	ARDHPPLSDDYDSLDR	CAATCAGCAGACAGCAGTGGTACTTCCAATTGGGTA	QSADSSGTSNWV	CAGGTGCAGCTGGTGGAGTCTGGGGGAGGCGTGGTCCAGCCTGGGAGGTCCCTGAGACTCTCCTGTACAGCGTCTGGATTCAGTTTCAGTAACTATGGCATGCACTGGGTCCGCCAGGCTCCAGGCAAGGGGCTGGAGTGGGTGGCAGTTATATGGTATGATGGAAGTAAAAGATTCTATGCAGACTCCGTGAAGGGCCGATTCACCATCTCCAGAGACAATTCCAAGAATACAGTGTATCTGCACATGAATAGCCTGAGAGCCGAGGACACGGCTCTGTATTACTGTGCGAGAGATCACCCCCCTTTGTCCGATGACTATGACTCGCTCGACCGCTGGGGCCGTGGCACCCTGGTCACTGTCTCCTCA	TCCTATGAGCTGACACAGCCACCCTCGGTGTCAGTGTCCCCAGGACAGACGGCCAGGATCACCTGCTCTGGAGATGCATTGCCAAAGCAATATGCTTATTGGTACCAACAGAGGCCAGGCCAGGCCCCTATACTGGTAATATATAAAGACACTGAGAGGCCCTCAGGGACCCCTGAGCGGTTCTCTGGCTCCAGCTCAGGGGCAACGGTCACGTTGACCATTAGTGGAGTCCAGGCAGAAGACGAGGCTGACTATTATTGTCAATCAGCAGACAGCAGTGGTACTTCCAATTGGGTATTCGGCGGAGGGACCAAGCTGACCGTCCTA
374	IML3695	Post-vax	ADI-67211	IGHV4-31*03	IGHD6-13*01	IGHJ6*02	IGKV3-20*01	IGKJ1*01	3.4	3.6	S2	No						GCGAGAGTTTCGGTAGCAACAGCTGGCGGCATGGACGTC	ARVSVATAGGMDV	CAGCACTATGGTACTTCGTCCTTGTATACT	QHYGTSSLYT	CAGGTGCAGCTGCAGGAGTCGGGCCCAGGACTGGTGAAGCCTTCACAGACCCTGTCCCTCACCTGCACTGTCTCTGGTGGCTCAATCAGCAGTAGTGCTTACTACTGGAGCTGGATCCGCCAGCACCCAGGGAAGGGCCTGGAGTGGATTGGGTACATCTATTACAGTGGGAGCACCTACTACAACCCGTCCCTCAAGAGTCGAGTAACCATATCCTTAGACACGTCTAAGAACAAGTTCTCCCTGAACCTGAACTCTGTGACCGCCGCGGACACGGCCGTGTATTACTGTGCGAGAGTTTCGGTAGCAACAGCTGGCGGCATGGACGTCTGGGGGCAAGGGACCACGGTCACCGTCTCCTCA	GAAATTGTGTTGACGCAGTCTCCAGGCACCCTGTCTTTGTCTCCAGGGGAAAGAGTCACCCTCTCCTGCAGGGCCAGTCAGCCTATTAGCAGCAACTACTTAGCCTGGTACCAGCAGAAACCTGGCCAGGCTCCCAGGCTCCTCATCTATGGTGCATCCAGCAGGGCCACTGGCATCCCAGACAGGTTCAGTGGCAGTGGGTCTGGGACAGACTTCACTCTCACCATCGGCAGACTGGAGCCTGAAGATATTGCTGTGTTTTACTGTCAGCACTATGGTACTTCGTCCTTGTATACTTTCGGCCAAGGGACCAAGGTGGAAATCAAA
375	IML3695	Post-vax	ADI-67212	IGHV1-69*01	IGHD3-22*01	IGHJ4*02	IGKV3-11*01	IGKJ3*01	1.4	1.4	S2	No						GCGAGAGTGTCCGCCTATTACTATGATAGTAGTGGTCAACTTGGACAAAATGACTCC	ARVSAYYYDSSGQLGQNDS	CAGTACCGTAACAACTGGCCTCCGGTTTTCACT	QYRNNWPPVFT	CAGGTGCAGCTGGTGCAGTCTGGGGCTGAGGTGAAGAAGCCTGGGTCCTCGGTGAAGGTCTCCTGCAAGGCTTCTGGAGACACCTTCAGCAGCTATGCTATCACCTGGGTGCGACAGGCCCCTGGACAAGGGCTTGAGTGGATGGGAGGGGTCATCCCTATCTTTGGTACAGCAAACTACGCACAGAAATTCCAGGGCAGAGTCACGATTACCGCGGACGAATCCACGAGCACAGCCTACATGGAGCTGAGCAGCCTGAGATCTGAGGACACGGCCGTGTATTACTGTGCGAGAGTGTCCGCCTATTACTATGATAGTAGTGGTCAACTTGGACAAAATGACTCCTGGGGCCAAGGAACCCTGGTCACCGTCTCCTCA	GAAATTGTGTTGACACAGTCTCCAGCCACCCTGTCTTTGTCTCCAGGGGAAAGAGCCACCCTCTCCTGCAGGGCCAGTCAGAGTGTTAGCAGCTTCTTAGCCTGGTACCAACAGAAACCTGGCCAGGCTCCCAGGCTCCTCATCTATGATGCATCCAACAGGGCCACTGGCATCCCAGCCAGGTTCAGTGGCAGTGGGTCTGGGACAGACTTCACTCTCACCATCAGCAGCCTAGAGCCTGAAGATTTTGCAGTTTATTACTGTCAGTACCGTAACAACTGGCCTCCGGTTTTCACTTTCGGCCCTGGGACCAAAGTGGATATCAAA
376	IML3695	Post-vax	ADI-67213	IGHV1-3*01	IGHD3-3*01	IGHJ4*02	IGLV3-1*02	IGLJ2*01	7.5	3.9	S2	No						GCGAGAGCCACCGGTTTTACGAACCTTGACAAC	ARATGFTNLDN	CAGGCGTGGGACAACAGCCATGTAGTA	QAWDNSHVV	CAGGTCCAGCTTGTGCAGTCTGGGGCTGAGGTGAAGGAGCCTGGGGCCTCAGTGAAAATTTCCTGCAAGGCTTCTGGATACACCTTTATTGGTTATCTTATGCAATGGGTGCGCCAGGCCCCCGGACAAAGGCTTGAGTGGATGGGATGGATCAATGATGCCAATGGTGACACAAAATATTCACAGAAGTTCCAGGGCAGAGTCACCATTAACAGGGACACATCCGCGACCACAACCTACCTGCAGCTGACCAGCCTCACATCTGAAGACACGGCTGTGTATTACTGTGCGAGAGCCACCGGTTTTACGAACCTTGACAACTGGGGCCAAGGAACCCTGGTCACCGTCTCCTCA	TCCTATGAGCTGACTCAGCCACCCTCAGTGTCCGTGTCTCCAGGACAGACAGCCAGCTTCCTCTGCTCTGGAGATAAATTGGGGGATAAATATGTTTGCTGGTATCAACAGAAGCCAGGCCAGTCCCCCGTCCTGGTCATCTATCAAGATACCGAGCGGCCCTCAGGGATCCCTGAGCGATTCTCTGGCTCCAACTCTGGAAACACAGCCACTCTGACCATCAGCGGGACCCAGGCTATGGATGAGGCTGACTATTACTGTCAGGCGTGGGACAACAGCCATGTAGTATTCGGCGGAGGGACCAAGCTGACCGTCCTA
377	IML3695	Post-vax	ADI-67214	IGHV4-59*01	IGHD5-12*01	IGHJ4*02	IGLV3-21*04	IGLJ7*01	5.5	4.2	S2	No						GCGCGGGAGGTATATCGTGGCTACGATAGGCTTTTTGAGTAC	AREVYRGYDRLFEY	CAGGTGTGGGATAGTGCTACTGATCATCGGGTG	QVWDSATDHRV	CAGGTGCAGCTGCAGGAGTCGGGCCCAGGACTGGTGAAGCCTTCGGAGACCCTGTCCCTCACCTGCACTGTCTCTGGTGGCTCCATCAGTGAATATTACTGGAGCTGGATCCGGCAGCCCCCAGGGAAGGCACTGGAGTGGCTTGGGTATTTCTATCATAGTGGGAGCACCAATTACAACCCCTCCCTCAAGAGTCGACTCACCATATCACTAGACACGTCCAAGAACCAGTTCTCCCTGAAGCTGAGCTCTGTGACCGCTGCGGACACGGCCATATATTACTGTGCGCGGGAGGTATATCGTGGCTACGATAGGCTTTTTGAGTACTGGGGCCAAGGAACCCTGGTCACCGTCTCCTCA	TCCTATGTGCTGACTCAGCCACCCTCAGTGTCAGTGGCCCCAGGAGAGACGGCCAGGATTACCTGTGGGGGAGACAACATTGGAACTAAAGGTGTTCACTGGTACCAGCAGAAGCCAGGCCAGGCCCCTGTATTGGTCATTTATTATGATACCGACCGGCCCTCAGGGATCCCTGAGCGATTCTCTGGCTCCAACTCTGGGAACACGGCCACCCTGACCATCAGCAGGGTCGAAGCCGGGGATGAGGCCGACTATTACTGTCAGGTGTGGGATAGTGCTACTGATCATCGGGTGTTCGGAGGAGGCACCCAGCTGACCGTCCTC
378	IML3695	Post-vax	ADI-67215	IGHV3-33*01	IGHD6-6*01	IGHJ6*02	IGLV3-1*01	IGLJ1*01	2	2.5	NTD	No						GCGAGCCAGGAGGGTATAACAGCTCGGACGTTGTATTACTATGGCATGGACGTC	ASQEGITARTLYYYGMDV	CAGGCGTGGGACAGAACCACTGCTGTT	QAWDRTTAV	CAGGTGCAGCTGGTGGAGTCTGGGGGAGGCGTGGTCCAGCCTGGGAGGTCCCTGAGACTCTCCTGTGCAGCGTCTGGACTCGCCTTCAGTAACTATGGCATGCACTGGGTCCGCCAGGCTCCAGGCAAGGGGCTGGAGTGGGTGGCATTTATATGGTATGATGGAAGTAATAAATACTATGCAGACTCCGTGAAGGGCCGATTCACCCTCGCCAGAGACAATTCCAAGAACACGCTGTATCTGCAAATGAACAGCCTGAGAGCCGAGGACACGGCTGTGTATTACTGTGCGAGCCAGGAGGGTATAACAGCTCGGACGTTGTATTACTATGGCATGGACGTCTGGGGGCAAGGGACCACGGTCACCGTCTCCTCA	TCCTATGAGCTGACTCAGCCACCCTCAGCGTCCGTGTCCCCAGGACAGACAGCCAGCATCACCTGCTCTGGAGATAAATTGGGGGATGAATATACTTCCTGGTATCAGCAGAAGCCAGGCCAGTCCCCTGTGCTGGTCATCTATCAAGATAGCATGCGGCCCTCAGGGATCCCTGAGCGATTCTCTGGCTCCAACTCTGGGAACACAGCCACTCTGACCATCAGCGGGACCCAGGCTATGGATGAGGCTGACTATTACTGTCAGGCGTGGGACAGAACCACTGCTGTTTTCGGAACTGGGACCAAGGTCACCGTCCTA
379	IML3695	Post-vax	ADI-67216	IGHV4-31*03	IGHD6-13*01	IGHJ5*02	IGLV3-1*01	IGLJ2*01	2.7	2.5	Undefined	No		>1.0				GCGAGGGGCAGCAGCTGGCGATACAACTGGTTCGACCCC	ARGSSWRYNWFDP	CAGGCGTGGGACAGTAGTACTGTGATA	QAWDSSTVI	CAGGTGCAGCTGCAGGAGTCGGGCCCAGGACTGGTGAAGCCTTCACAGACCCTGTCCCTCACCTGCACTGTCTCTGGTGGCTCCATCAGCAGTGGTGGTTACTACTGGACCTGGATCCGCCAGCACCCAGGGAAGGGCCTGGAGTGGATTGGATACATCTATTACAGTGGGACCACCTACTACAACCCGTCCCTGAAGAGTCGAGTTATCATATCAGTAGACACGTCTAAGAACCAGTTCTCCCTGAGGCTGAACTCTGTGACTGCCGCGGACACGGCCGTGTATTTCTGTGCGAGGGGCAGCAGCTGGCGATACAACTGGTTCGACCCCTGGGGCCAGGGAACCCTGGTCACCGTCTCCTCA	TCCTATGAGCTGACTCAGCCACCCTCAGTGTCCGTGTCCCCAGGACAGACAGCCAGCATCACCTGCTCTGGAGATAAATTGGGGGATAAATATGCTTGCTGGTATCAGCAGAAGCCAGGCCAGTCCCCTGTTCTGGTCATCTTTGAAGATAACAAGCGGCCCTCAGGGATCCCTGAGCGATTCTCTGGCGCCAACTCTGGGAACACAGCCACTCTGACCATCAGCGGGACCCAGGCTATGGATGAGGCTGACTATTACTGTCAGGCGTGGGACAGTAGTACTGTGATATTCGGCGGAGGGACCAAGCTGACCGTCCTA
380	IML3695	Post-vax	ADI-67217	IGHV1-24*01	IGHD3-16*02	IGHJ6*02	IGKV2-24*01	IGKJ1*01	4.1	3.3	NTD	No		>1.0				GCAACAGCCTTCGCGGTACGGTTGGGGGAATTATCGTCATATTCGTACTACTACGGAATGGACGTC	ATAFAVRLGELSSYSYYYGMDV	ATGCAAGCTAGACATTTTCCTCATACT	MQARHFPHT	CAGGTCCAGCTGGTACAGTCTGGGGCTGAGGTGAAGAGGCCTGGGGCCTCAGTGAAGGTCTCCTGCAAGGTTTCCGGATACACCCTCACTGAATTATCCATCCACTGGGTGCGACAGGCTCCTGGAAAAGGGCTTGAGTGGATGGGAGGTTTTGATCCTGAGGACGCTGAAACGATCTACGCACAGAACTTCCAGGGCAGAGTCACCATGACCGAGGACACATCCACAGACACAGCCTACATGGATCTGAGGAGCCTGAGATCTGACGACACGGCCGTTTATTACTGTGCAACAGCCTTCGCGGTACGGTTGGGGGAATTATCGTCATATTCGTACTACTACGGAATGGACGTCTGGGGGCAAGGGACCACGGTCACCGTCTCCTCA	GATATTGTGATGACCCAGACTCCACTCTCCTCACCTGTCACCCTTGGACAGCCGGCCTCCATCTCCTGCAGGTCTAATCAAAGCCTCGTACACACTGATGGGAACACCTACTTGAGTTGGCTTCACCAGAGGCCAGGCCAGCCTCCAAGACTCCTCATTTATATGATTTCTAACCGGTTCTCTGGGGTCCCAGACAGATTCAGTGGCAGTGGGGCCGAGACAGATTTCACACTGAAAATCAGCAGGGTGGAAGCTGAGGATGTCGGGGTTTATTACTGCATGCAAGCTAGACATTTTCCTCATACTTTCGGCCAAGGGACCAAGGTGGAAATCAAA
381	IML3695	Post-vax	ADI-67218	IGHV4-34*01	IGHD1-26*01	IGHJ3*02	IGLV2-11*01	IGLJ2*01	3.1	2.1	RBD	No		0.0657	>1.0	0.057		GCGAGGTGGGACCTATTGTATCCGCGCGATGCTTTTGATATC	ARWDLLYPRDAFDI	TCATATGCAGGCAGCTATGTGGTA	SYAGSYVV	CAGGTGCAGCTACAACAGTGGGGCGCAGGACTGTTGAAGCCTTCGGAGACCCTGTCCCTCACCTGCGCTGTATATAGTGGGTCCTTCAGTGGTTCCTCCTGGAGCTGGATCCGCCAGCCCCCAGGGAAGGGGCTGGAGTGGATTGGGGAAATCAATCATAGTGGAAGCACCAACTACAACTCGTCCCTCAAGAGTCGAGTCACCATATCAATAGACACGTCCAAGAACCAGTTCTCCCTGAGGCTGAACTCTGTGACCGCCGCGGACACGGCTGTGTATTACTGTGCGAGGTGGGACCTATTGTATCCGCGCGATGCTTTTGATATCTGGGGCCAAGGGACAATGGTCACCGTCTCTTCA	CAGTCTGCCCTGACTCAGCCTCGCTCAGTGTCCGGGTCTCCTGGACAGTCAGTCACCATCTCCTGCACTGGAACCAGCAGTGATGTTGGTGGTTATAACTATGTCTCCTGGTACCAGCAACACCCAGGCAAAGCCCCCAAACTCATGACTTATGATGTCAGTAAGCGGCCCTCAGGGGTCCCTGATCGCTTCTCTGGCTCCAAGTCTGGCAACACGGCCTCCCTGACCATCGCTGGGCTCCAGGCTGAGGATGAGGCTGAGTATCACTGCTGCTCATATGCAGGCAGCTATGTGGTATTCGGCGGAGGGACCAAGCTGACCGTCCTA
382	IML3695	Post-vax	ADI-67219	IGHV5-51*01	IGHD1-20*01	IGHJ6*02	IGKV3-20*01	IGKJ1*01	2	2.8	S2	No						GCGAGACTATCTTTCGTGTATAACTGGAATCGTTATTACTACTACGGTATGGACGTC	ARLSFVYNWNRYYYYGMDV	CAGCAGTATGGTAGCTCAACGGGGACG	QQYGSSTGT	GAGGTGCAGCTGGTGCAGTCTGGAGCAGAGGTGAAAAAGCCCGGGGAGTCTCTGAAGATCTCCTGTAAGGCTTCTGGATACACCTTTACCGACTACTGGATCGGCTGGGTGCGCCAGATGCCCGGGAAAGGCCTGGAGTGGATGGGGATCATCTATCCTGGTGACTCTGATACCAGATACAGCCCGTCCTTCCAAGGCCAGGTCACCATCTCAGCCGACAAGTCCCTCAGCACCGCCTACCTGCAGTGGAGCAGCCTGAAGGCCTCGGACACCGCCATGTATTATTGTGCGAGACTATCTTTCGTGTATAACTGGAATCGTTATTACTACTACGGTATGGACGTCTGGGGGCAAGGGACCACGGTCACCGTCTCCTCA	GAAATTGTGTTGACGCAGTCTCCAGGCACCCTGTCTTTGTCTCCAGGGGAAAGAGCCACCCTCTCCTGCAGGGCCAGTCAGAGTGTTAGCAGCAGCTCCTTAGCCTGGTACCAGCAAAAACCTGGCCAGACTCCCAGGCTCGTCATCTCTGGTACATCCAGCAGGGCCACTGGCATCCCAGACAGGTTCAGTGGCAGTGGGTCTGGGACAGACTTCACTCTCACCATTAGTAGACTGGAGCCTGAAGATTTTGCAGTGTATTACTGTCAGCAGTATGGTAGCTCAACGGGGACGTTCGGCCAAGGGACCAAGGTGGAAATCAAA
383	IML3695	Post-vax	ADI-67220	IGHV3-30*03	IGHD6-13*01	IGHJ1*01	IGKV1-12*01	IGKJ2*01	5	3.2	S2	No						ACGTTTATATCTCTATTGTTCTTATTTCTGGCGTCCTCGAGGGCCCAGGTCCAGCTGGTA	TFISLLFLFLASSRAQVQLV	CAACAGGCTAACACTTTCCCGTACACT	QQANTFPYT	CAGGTGCAGCTGGTGGAGTCTGGGGGAACCGTGGTCCAGCCTGGGAGGTCCCTGAGACTCTCCTGTGGAGCCTCTGGATTCACCTTCAGCAGCCATGGCATGCACTGGGTCCGCCAGACTCCAGGCAAGGGTCTGGAGTGGGTGGCAGTTATATCATATGATGGAATTAATAAATTCTATGCAGACTCCGTGAAGGGCCGATTCACCATCTCCAGAGACAGTGCCACGAACACGGTGTATCTGCAAATGAACAGCCTGACACTAACGCGTTCAAAAATGAAATGGGTTACGTTTATATCTCTATTGTTCTTATTTCTGGCGTCCTCGAGGGCCCAGGTCCAGCTGGTATGGGGCCAGGGCACCCTGGTCACCGTCTCCTCA	GACATCCAGATGACCCAGTCTCCATCTTCCGTGTCTGCATCTGTAGGAGACAGAGTCACCATCACTTGTCGGGCGAGTCGGGACATTAGCAACTGGTTAGCCTGGTATCAGCAGAAACCCGGTAAAGCCCCTAACCTCCTGATCTATGCTGCATCCAGTTTGCAAAGTGGGGTCCCATCAAGGTTCAGCGGCACTGGATCTGGGACAGATTTCACTCTCACCATCAGCAGCCTGCAGCCTGAAGATTTTGCAACTTACTATTGTCAACAGGCTAACACTTTCCCGTACACTTTTGGCCAGGGGACCAAGCTGGAGATCAAA
384	IML3695	Post-vax	ADI-67221	IGHV3-30*18	IGHD4-17*01	IGHJ6*02	IGKV4-1*01	IGKJ4*01	4.1	0.7	RBD	No						GCGAAAGACTACGGTGACTACGGAGGTTTGAACTCC	AKDYGDYGGLNS	CAGCAATATTATAGTACTCCGCTCACT	QQYYSTPLT	CAGGTGCAGCTGGTGGAGTCTGGGGGAGGCGTAGTCCAGCCTGGGAAGTCCCTGAGACTCTCCTGTGCAGCCTCTGGATTCACCTTCAATAACTATGGCATGCACTGGGTCCGCCAGGCTCCAGGCAAGGGGCTGGAGTGGGTGGCAGTTATAGCATATGATGGAAGTCATAAATATTATGCAGACTCCGTGAGGGGCCGATTCACCATCTCCAGAGACAATTCCAAGAGCACACTGTATCTGCAAATGAGCAGCCTGAGAACTGAGGACACGGCTGTGTATTACTGTGCGAAAGACTACGGTGACTACGGAGGTTTGAACTCCTGGGGGCAAGGGACCACGGTCACCGTCTCCTCA	GACATCGTGATGACCCAGTCTCCAGACTCCCTGGCTGTGTCTCTGGGCGAGAGGGCCACCATCAACTGCAAGTCCAGCCAGACTGTTTTATACAGCTCCAACAATAAGAACTACTTAGCTTGGTACCAGCAGAAACCAGGACAGCCTCCTAAGCTGCTCATTTACTGGGCATCTAGCCGGGAATCCGGGGTCCCTGACCGATTCAGTGGCAGCGGGTCTGGGACAGATTTCACTCTCACCATCAGCAGCCTGCAGGCTGAAGATGTGGCAGTTTATTACTGTCAGCAATATTATAGTACTCCGCTCACTTTCGGCGGAGGGACCAAGGTGGAGATCAAA
385	IML3695	Post-vax	ADI-67222	IGHV4-31*03	IGHD6-13*01	IGHJ5*02	IGLV3-9*01	IGLJ2*01	2.4	8.2	Undefined	No						GCGAGGGGCAGCAGCTGGCGATACAACTGGTTCGACCCC	ARGSSWRYNWFDP	CAGGTGTGGGACACCACCAGCGTGATC	QVWDTTSVI	CAGGTGCAGCTGCAGGAGTCGGGCCCAGGACTGGTGAAGCCTTCACAGACCCTGTCCCTCACCTGCACTGTCTCTGGTGGCTCCATCAGCAGTGGTGGTTACTACTGGACCTGGATCCGCCAGCACCCAGGGAAGGGCCTGGAGTGGATTGGATACATCTATTACAGTGGGACCACCTACTACAACCCGTCCCTGAAGAGTCGAGTTATCATATCAGTAGACACGTCTAAGAACCAGTTCTCCCTGAGGCTGAGCTCTGTGACTGCCGCGGACACGGCCGTGTATTTCTGTGCGAGGGGCAGCAGCTGGCGATACAACTGGTTCGACCCCTGGGGCCAGGGAACCCTGGTCACCGTCTCCTCA	TCCTATGAGCTGACTCAGCCACTCTCAGTGTCCGTGGCCCTGGGACAGACGGCCAGAATTACCTGTGGGGGAGACAACGTTGGAGATGAAACTGTGTTCTGGTACCACCAGAAGCCAGGCCAGGCCCCTGTATTGGTCCTGTATGGGGATTCCAACCGGCCCTCTGGGATCCCTGAGCGATTCTCTGGCTCCAAGTCGGGGAACACGGCCACCCTGACCATCACCAGAGCCCAGGCCGGGGATGAGGCTGACTATTACTGTCAGGTGTGGGACACCACCAGCGTGATCTTCGGCGGAGGGACCAAGCTGACCGTCCTA
386	IML3695	Post-vax	ADI-67223	IGHV3-30*18	IGHD4-17*01	IGHJ6*02	IGKV4-1*01	IGKJ4*01	2.4	0.7	RBD	No		>1.0	>1.0			GCGAAAGACTACGGTGACTACGGAGGTATGGACGTC	AKDYGDYGGMDV	CAGCAATATTATAGTGCTCCTCTCACT	QQYYSAPLT	CAGGTGCAGCTGGTGGAGTCTGGGGGAGGCGTGGTCCAGCCTGGGAGGTCCCTGAGACTCTCCTGTGCAGCCTCTGGATTCACCTTCAATACTTATGGCATGCACTGGGTCCGCCAGGCTCCAGGCAAGGGGCTGGAGTGGGTGGCAGTTATATCATATGATGGAAGTCATATATACTATGCAGACTCCGTGAAGGGCCGATTCACCATCTCCAGAGACAGTTCCAAGAACACGCTGTATCTGCAAATGAACAGCCTGAGAGCTGAGGACACGGCTGTATATTACTGTGCGAAAGACTACGGTGACTACGGAGGTATGGACGTCTGGGGGCAAGGGACCACGGTCACCGTCTCCTCA	GACATCGTGATGACCCAGTCTCCAGACTCCCTGGCTGTGTCTCTGGGCGAGAGGGCCACCATCAACTGCAAGTCCAGCCAGAGTGTTTTATACAGCTCCAACAATAAGAACTACTTAGCTTGGTATCAGCAGAAACCAGGACAGCCTCCTAAGCTGCTCATTTACTGGGCATCTACCCGGGAATCCGGGGTCCCTGACCGATTCAGTGGCAGCGGGTCTGGGACAGATTTCACTCTCACCATCAGCAGCCTGCAGGCTGAAGATGTGGCAGTTTATTACTGTCAGCAATATTATAGTGCTCCTCTCACTTTCGGCGGAGGGACCAAGGTGGAGATCAAA
387	IML3695	Post-vax	ADI-67224	IGHV3-7*01	IGHD3-3*01	IGHJ6*02	IGLV3-19*01	IGLJ1*01	4.8	4.6	S2	No						GCGAGACAAAGTATCTATCACGATTTTACGAGTGGTGTAGGTTACTCCTACTACTACACTATGGACGTC	ARQSIYHDFTSGVGYSYYYTMDV	AGCTCCCGGGACAGAAGTGGTAATTCTTTTGTC	SSRDRSGNSFV	GAGGTGCAGCTGGTGGAGTCTGGGGGAGGCTTGGTCCAGCCTGGGGGGTCCCTGAGACTCTCCTGTATAGTCTCTGAATTCACCTTTGATAGCTATTGGATGAGCTGGGTCCGCCAGGCTCCAGGGAAGGGGCTGGAGTGGGTGGCCAACATACGGCACGATGGAAGTGAGAAATACTATGTAGACTCTGTGAGGGGCCGATTCACCATTTCCAGAGACAACGCCAAGAATTCACTGTATCTGCAAATGAACAGCCTGAGAGCCGAGGACTCGGCTGTGTATTACTGTGCGAGACAAAGTATCTATCACGATTTTACGAGTGGTGTAGGTTACTCCTACTACTACACTATGGACGTCTGGGGGCAAGGGACCACGGTCACCGTCTCCTCA	TCTTCTGAGCTGACTCAGGACCCTGCTGTGTCTGTGGCCTTGGGACAGACAGTCACGATCACATGCCAGGGAGACAGCCTCAGAATCTATTTTGCAACCTGGTATCGCCAGAAGGCAGGACAGGCCCCTGTACTTGTCATCTATGGTAAAAACAACCGGCCCTCAGGGATCCCAGACCGATTCTCTGGCTCCAGGTCAGGAGACACAGCTTCCTTGACCATCACTGGGGCTCAGGCGGAAGATGAGGCTGACTATTACTGTAGCTCCCGGGACAGAAGTGGTAATTCTTTTGTCTTCGGAACTGGGACCAAGGTCACCGTCCTA
388	IML3695	Post-vax	ADI-67225	IGHV3-21*01	IGHD5-12*01	IGHJ6*02	IGKV1-12*01	IGKJ1*01	1.4	0.7	Undefined	No		>1.0	>1.0	>1.0		GCGAGAGACCAAGATAGTGGCTACGATTATGGGTTTAGTCACTATTACTACGGTCTGGACGTC	ARDQDSGYDYGFSHYYYGLDV	CAACAGGGTAACAGTTTCCCCTGGACG	QQGNSFPWT	GAGGTGCAGCTGGTGGAGTCTGGGGGAGGCCTGGTCAAGCCTGGGGGGTCCCTGAGACTCTCCTGTGCAGCCTCTGGATTCACCTTCAGTAGCTATAGCATCAACTGGGTCCGCCAGGCTCCAGGGAAGGGGCTGGAGTGGGTCTCATCCATTAGTAGTCGTAGTAATTACATATACTACGCAGACTCAGTGAAGGGCCGATTCACCATCTCCAGAGACAACGCCAAGAACTCACTGTATCTGCAAATGCACAGCCTGAGAGCCGAGGACACGGCTGTGTATTACTGTGCGAGAGACCAAGATAGTGGCTACGATTATGGGTTTAGTCACTATTACTACGGTCTGGACGTCTGGGGGCAAGGGACCACGGTCACCGTCTCCTCA	GACATCCAGATGACCCAGTCTCCATCTTCCGTGTCTGCATCTGTAGGAGACAGAGTCACCATCACTTGTCGGGCGAGTCAGGGTATTAGCAGCTGGTTAGCCTGGTATCAGCAGAAACCAGGGAAAGCCCCTAAGCTCCTGATCTATGCTGCATCCAGTTTGCAAAGTGGGGTCCCATCAAGGTTCAGCGGCAGTGGATCTGGGACAGATTTCACTCTCACCATCAGCAGACTGCAGCCTGAAGATTTTGCAACTTACTATTGTCAACAGGGTAACAGTTTCCCCTGGACGTTCGGCCAAGGGACCAAGGTGGAAATCAAA
389	IML3695	Post-vax	ADI-67226	IGHV1-69*01	IGHD6-13*01	IGHJ4*02	IGKV1-39*01	IGKJ3*01	4.4	0.7	S2	No						GCGAGAGATCATACGGGGGGCAGCTGGTACGGGCTTGACTAC	ARDHTGGSWYGLDY	CAACAGAGTTACAGTACCCTCCCTCAC	QQSYSTLPH	CAGGTGCAGCTGGTGCAGTCTGGGGCTGAGGTGAAGAAGCCTGGGTCCTCGGTGAAGGTCTCCTGCAAGGCTTCTGGAGGCACCTTCAGCACCTATGTTATCAACTGGGTGCGGCAGGCCCCTGGACAAGGGCTTGAGTGGATGGGAGGGATCATCCCTATCCTTGGTACAACAAACCTCGCACAGAAGTTGCAGGGCAGACTCACCATTACCGCGGACGAATCCACGAGCACAGCCTACATGGAGCTGAGCAGCCTGAGATCTGAGGACACGGCCATATATTACTGTGCGAGAGATCATACGGGGGGCAGCTGGTACGGGCTTGACTACTGGGGCCAAGGAACCCTGGTCACCGTCTCCTCA	GACATCCAGATGACCCAGTCTCCATCCTCCCTGTCTGCATCTGTAGGAGACAGAGTCACCATCACTTGCCGGGCAAGTCAGAGCATTATCAGCTATTTAAATTGGTATCAGCAGAAACCAGGGAAAGCCCCTAAGCTCCTGATCTATGCTGCATCCAGTTTGCAAAGTGGGGTCCCATCAAGGTTCAGTGGCAGTGGATCTGGGACTGATTTCACTCTCACCATCAGCAGTCTGCAACCTGAAGATTTTGCAACTTACTACTGTCAACAGAGTTACAGTACCCTCCCTCACTTCGGCCCTGGGACCAAAGTGGATATCAAA
390	IML3695	Post-vax	ADI-67227	IGHV2-26*01	IGHD6-13*01	IGHJ5*02	IGKV3-15*01	IGKJ1*01	2.7	2.8	NTD	No						GCACGGATTTTCTGGCAGCATGGGTACTGGTTCGACCCC	ARIFWQHGYWFDP	CAGCAGTATGATAACTGGCCCTTGACG	QQYDNWPLT	CAGGTCACCTTGAAGGAGTCTGGTCCTGTGCTGGTGAAACCCACAGAGACCCTCACGCTGACCTGCACCGTCTCTGGGTTCTCACTCTACAATGCTAAAATGGGTGTGAGCTGGATCCGTCAGCCCCCAGGGAAGGCCCTGGAGTGGCTTGCACACATTTTTTCGGGTGACGAAAAATCCTACAGTACATCTCTGAAGGGCAGGCTCACCATCTCCAAGGACACCTCCAAAAGCCAGGTGGTCCTTACCATGACCAACATGGACCCTGTGGACACAGGCACATATTACTGTGCACGGATTTTCTGGCAGCATGGGTACTGGTTCGACCCCTGGGGCCAGGGAACCCTGGTCACCGTCTCCTCA	GAAATAGTGATGACGCAGTCTCCAGCCACCCTGTCTCTGTCTCCAGGGGAAAGAGCCACCCTCTCCTGCAGGGCCAGTCAGACTGTTAGCAGCAACTTAGCCTGGTACCAGCAGACACCTGGCCAGGCTCCCAGGCTCCTCATCTATGGTACATCCACCAGGGCCACTGATATCCCAGCCAGGTTCAGTGGCAGTGGGTCTGGGACAGAGTTCACCCTCACCATCAGCAGCCTGCAGTCTGAAGATTTTGCGGTTTATTACTGTCAGCAGTATGATAACTGGCCCTTGACGTTCGGCCAAGGGACCAAGGTGGAAATCAAA
391	IML3695	Post-vax	ADI-67228	IGHV1-8*01	IGHD6-6*01	IGHJ6*02	IGKV2-40*01	IGKJ1*01	2.4	5.3	Undefined	No						GCGAGATTCTCGTCTTACTACTACTATTACGGTATGGACGTC	ARFSSYYYYYGMDV	ATGCAACGTATAGAGTATCCTCGTACT	MQRIEYPRT	CAGGTGCAGCTGGTGCAGTCTGGGGCTGAGGTGAAGAAGCCTGGGGCCTCAGTGAAGGTCTCCTGCAAGGCTTCTGGATACACCTTCACCAGTTTTGATATCAACTGGGTGCGACAGGCCACTGGACACGGGCTTGAGTGGATGGGATGGATGAACCCTAACAGTGGAAACACAGGCTATGCACAGAAATTCCAGGGCAGAGTCACCATGACCAGGAACACCTCCATAAGCACAGCCTATCTGGAGCTGAGCAGCCTGAGATCTGAGGACACGGCCGTATATTACTGTGCGAGATTCTCGTCTTACTACTACTATTACGGTATGGACGTCTGGGGGCAAGGGACCACGGTCACCGTCTCCTCA	GATATTGTGATGACCCAGACTCCACTCTCCCTGCCCGTCACCCCTGGAGAGCCGGCCTCCATGTCCTGCAGGTCTAGTCAGAGCCTCTTGGATACTGATGATGGAAACACCTATTTGGACTGGTACCTGCAGAAGCCAGGACAGCCTCCACAGCTCATCTATTCCCTTTCTTATGGGGCCGCTGGAGTCCCAGACAGGTTCAGTGGCAGTGGGTCAGGCACTGATTTCACACTGAACATCAGCAGGGTGGAGGCTGAGGATGTTGGGGTCTATTACTGCATGCAACGTATAGAGTATCCTCGTACTTTCGGCCAAGGGACCAAGGTGGAAATCAAA
392	IML3695	Post-vax	ADI-67229	IGHV3-7*01	IGHD6-19*01	IGHJ6*02	IGKV1-39*01	IGKJ2*01	8.5	2.5	S2	No						GCGAGAAGGCGGGCAAACTCGAGATACAGCGGTGGCTGGTATACCTACTACTACGCTATGGACGTC	ARRRANSRYSGGWYTYYYAMDV	CAACAGAGTTACAGTACGTCGGTCACT	QQSYSTSVT	GAGGTGCAGCTGGTGGAGTCTGGGGGAGGCTTGGTCCAGCCTGGGGGGTCCCTGAGACTCTCCTGTGCAGCCTCTGGATTCACCTCTGACTTCACCTTTAGCACCTTTTGGATGAGTTGGGTCCGCCAGGCTCCAGGGAAGGGGCTGGAGTGGGTGGCCAACATAAAGTACGATGGAAGTGAGACATATTATGTGGACTCTGTGAAGGGCCGATTCAGCATCTCCAGAGACAACGCCAGGAACTCACTGTCTCTTCAAATGAACAGCCTGAGAGCCGACGACACGGCTGTCTATTACTGTGCGAGAAGGCGGGCAAACTCGAGATACAGCGGTGGCTGGTATACCTACTACTACGCTATGGACGTCTGGGGGCAAGGGACCACGGTCACCGTCTCCTCA	GACATCCAGATGACCCAGTCTCCATCCTCCCTGTCTGCATCTGTAGGAGACAGAGTCACCATCACTTGCCGGACAAGTCAGACCATTAGCAGCTATTTAAATTGGTATCAGCACAAACCAGGGAAAGCCCTTAAGCTCCTGATGTATGCTGCATCCAGTTTGCAAAGTGGGGTCCCATCAAGGTTCAGTGGCAGTGGATCTGGGACAGATTTCACTCTAACCATCAGCAGTCTGCAACCTGAAGATTTTGCAACTTATTACTGTCAACAGAGTTACAGTACGTCGGTCACTTTTGGCCAGGGGACCAAGCTGGAGATCAAA
393	IML3695	Post-vax	ADI-67230	IGHV4-4*02	IGHD3-16*02	IGHJ6*02	IGKV3-20*01	IGKJ1*01	3.4	3.8	Undefined	No		>1.0		>1.0		GCGAGGGAGGGACCTAGTTTGGGGGTTGGCTTCTACTACGGTATGGACGTC	AREGPSLGVGFYYGMDV	CAGCAGTATGGTGCCTCACGGACG	QQYGASRT	CAGGTGCAGCTGCAGGAGTCGGGCCCAGGACTGGTGAAGCCTTCGGGGACCCTGTCCCTCACCTGCGCTGTCTCTGGTGGCTCCATCAGCAGTAGTAACTGGTGGAGTTGGGTCCGCCAGCCCCCAGGGAAGGGGCTGGAGTGGATTGGGGAAATCTATCATAGTGGGAGCACCAACTACAATCCGTCCCTCAAGAGTCGAGTGACCATTTCACTAGACAGGTCCAAGAACCAGTTCTCCCTGAAACTGATCTCTGTAACCGCCGCGGACACGGCCGTATATTACTGTGCGAGGGAGGGACCTAGTTTGGGGGTTGGCTTCTACTACGGTATGGACGTCTGGGGGCAAGGGACCACGGTCACCGTCTCCTCA	GAAATTGTGTTGACGCAGTCTCCAGGCTCCCTGTCTTTGTCTCCAGGGGAAAGAGCCACCCTCTCCTGCAGGGCCAGTCAGAGTCTTACCAGCACCTACTTAGCCTGGTACCAGCAGAAACCTGGCCAGGCTCCCAGGCTCCTCATCTATGGTGCGTCCAGCAGGGCCACCGGCATCCCAGACAGGTTCAGTGGCAGTGGGTCTGGGACAGACTTCACTCTCACCATCACCAGGCTGGAGCCTGAAGATTTTGCAGTGTATTTCTGTCAGCAGTATGGTGCCTCACGGACGTTCGGCCAAGGGACCAAGGTGGAAATCAAA
394	IML3695	Post-vax	ADI-67231	IGHV3-7*01	IGHD3-3*01	IGHJ6*02	IGLV3-19*01	IGLJ1*01	2	3.5	S2	No		>1.0		>1.0		GCGAGACAAAGTATCTATCACGATTTTAGGAGTGGTGTAGGTTACTCCTACTACTACACTATGGACGTC	ARQSIYHDFRSGVGYSYYYTMDV	AGCTCCCGGGACAGCAGTGGTAATTATTTTGTC	SSRDSSGNYFV	GAGGTGCAGCTGGTGGAGTCTGGGGGAGGCTTGGTCCAGCCTGGGGGGTCCCTGAGACTCTCCTGTACAGTCTCTGGATTCACCTTTAATAGCTATTGGATGAGCTGGGTCCGCCAGGCTCCAGGGAAGGGGCTGGAGTGGGTGGCCAACATAAGGCACGATGGAAGTGAGAAATACTATGTGGACTCTGTGAAGGGCCGATTCACCATCTCCAGAGACAACGCCAAGAACTCACTGTATCTGCAAATGAACAGCCTGAGAGCCGAGGACTCGGCTGTGTATTACTGTGCGAGACAAAGTATCTATCACGATTTTAGGAGTGGTGTAGGTTACTCCTACTACTACACTATGGACGTCTGGGGGCAAGGGACCACGGTCACCGTCTCCTCA	TCTTCTGAGCTGACTCAGGACCCTGCTGTGTCTGTGGCCTTGGGACAGACAGTCACGATCACATGCCAGGGAGACAGCCTCAGAATCTATTTTGCAACCTGGTATCAGCAGAAGGCAGGACAGGCCCCTGTACTTGTCATCTATGGTAAAAACAACCGGCCCTCAGGGATCCCAGACCGATTCTCTGGCTCCAGGTCAGGAGACACAGCTTCCTTGACCATCACTGGGGCTCAGGCGGAAGATGAGGCTGACTATTACTGTAGCTCCCGGGACAGCAGTGGTAATTATTTTGTCTTCGGAACTGGGACCAAGGTCACCGTCCTA
395	IML3695	Post-vax	ADI-67232	IGHV3-33*01	IGHD6-6*01	IGHJ4*02	IGLV3-1*01	IGLJ3*02	3.7	2.1	Undefined	No						GCGAGAGAAGCCTCCTGGGAAGGCTCGTCTCAGGTAGACTAC	AREASWEGSSQVDY	CAGGCGTGGGACAGCAGCGCTGTGGTG	QAWDSSAVV	CAGGTGCAGCTGGTGGAGTCTGGGGGAGGCGTGGTCCAGCCTGGGAGGTCCCTGAGACTCTCCTGTGCAGCGTCTGGCTTCACCTTCAGTAGCTCTGGCATGCACTGGGTCCGCCAGGCTCCAGGCAAGGGGCTGGAGTGGGTGGCAGTTATTTGGTTTGATGGAACCAAAAAAAACTATGCAGACTCCGTGAAGGGCCGATTCACCGTCTCCAGAGACAATTCCAACAACACGCTGTTTCTGCAAATGAACAGCCTGAGAGCCGAGGACACGGCTGTGTATTACTGTGCGAGAGAAGCCTCCTGGGAAGGCTCGTCTCAGGTAGACTACTGGGGCCAAGGAACCCTGGTCACCGTCTCCTCA	TCCTATGAGCTGACTCAGCCACCCTCAGTGTCCGTGTCCCCAGGACAGACAGCCAGCATCACCTGCTCTGGAGATAAATTGGGGCATAAATATGCTTGTTGGTATCAGCAGAAGCCAGGCCAGTCCCCTGTGTTGGTCATCTATCAGGATAACAAGCGGCCCTCAGGGATCCCTGAGCGATTCTCTGGCTCCAACTCTGGGAACACAGCCACTCTGACCATCAGCGGGACCCAGGCTATGGATGAGGCTGACTATTACTGTCAGGCGTGGGACAGCAGCGCTGTGGTGTTCGGCGGAGGGACCAAGCTGACCGTCCTA
396	IML3695	Post-vax	ADI-67233	IGHV1-69*01	IGHD3-10*01	IGHJ3*02	IGKV3-11*01	IGKJ1*01	5.1	2.4	NTD	No						GCGAGATGGTTCGGGGAGGACGCTTTTGACTAC	ARWFGEDAFDY	CAGCGGCGTAGCAACTGGCCTCCGTGGACG	QRRSNWPPWT	CAGGTGCAGCTGGTGCAGTCTGGGGCTGAGGTGAAGAAGCCTGGGTCCTCGGTGAAGGTCTCCTGCAAGACTTCTGGAGGCACCTTCAGAAGCCACGCTATGAACTGGGTGCGACAGGCCCCTGGACAAGGGCTTGAGTGGATGGGGGGGACCATCCCTATCTTTGGAACAGCAAACTACGCACAGAAGTTTCAGGACAGAGTCACAATTATCGCGGACGAATCCACGAGCACAGCCTACTTGGAGCTGAGCAGCCTGAAATCTGAGGACACGGCCGTGTATTACTGTGCGAGATGGTTCGGGGAGGACGCTTTTGACTACTGGGGCCAAGGGACAATGGTCACCGTCTCTTCA	GAAATTGTGTTGACACAGTCTCCAGCCACCCTGTCTTTGTCTCCGGGGGAAAGAGCCACCCTCTCCTGCAGGGCCAGTCAGAGTATTAGCACCTACTTGGCCTGGTACCAACAGAAACCTGGCCAGGCTCCCCGGCTCCTCATCTATGATGCATCCAACAGGGCCACTGGCATCCCAGCCAGGTTCAGTGGCAGTGGGTCTGGGACAGACTTCACTCTCACCATCAGCAGCCTAGAGCCTGAAGATTTTGCAATTTATTACTGTCAGCGGCGTAGCAACTGGCCTCCGTGGACGTTCGGCCAAGGGACCAAGGTGGAAATCAAA
397	IML3695	Post-vax	ADI-67234	IGHV4-39*01	IGHD6-19*01	IGHJ1*01	IGKV3-11*01	IGKJ2*01	9.4	3.9	Undefined	No						GCGAGACAAGTCGCACCACTGGCTGCCGCGGGTTGGGCCTAT	ARQVAPLAAAGWAY	CAGCAGCGTAGCAACTGGCCCCGAACGATCACT	QQRSNWPRTIT	CAGCTGCAGCTGCAGGAGTCGGGCCCAGGACTGGTGAAGCCTTCGGAGACCGTGTCCCTCACCTGCACTGTCTCTGGCGATTCCATCTCCAGGACTATTCTTTACTGGGGCTGGATCCGCCAGCCCCCGGGGAAGGGGCTGGAGTGGCTTGGGACTTTCTATTATAGTGGAGACACCTACTACAACCCGTCCCTCAGGAGTCGAGTCACCATTTCCGTAGACACGTCCAAGAACCAGTTTTCCCTGAATGTTACTTCTGTGACCGCCGCGGACACGGCTGTGTATTACTGTGCGAGACAAGTCGCACCACTGGCTGCCGCGGGTTGGGCCTATTGGGGCCAGGGCACCCTGGTCACCGTCTCCTCA	GAAATTGTGTTGACACAGTCTCCAGCCACCCTGTCTTTGTCTCCAGGGGAGAAAGCCACCCTCTCCTGCAGGGCCAGTCAGAGTGTTAGCGATTACTTAGCCTGGTACCAACAGAAACCTGGCCAGGCTCCCAGGCTCCTCATCTATGATGCATCCAACAGGGCCCCTGGCGTCCCAGCCAGGTTCAGTGGCAGTGGGTCTGGGACAGACTTCACTCTCACCATCAGCAGCCTGGAGCCTGAAGATTTTGGGGTTTACTACTGTCAGCAGCGTAGCAACTGGCCCCGAACGATCACTTTTGGCCAGGGGACCAAGCTGGAGATCAAA
398	IML3695	Post-vax	ADI-67236	IGHV3-7*01	IGHD5-12*01	IGHJ4*02	IGLV1-40*01	IGLJ1*01	2	2.7	Undefined	No						GCGAGAGCCCCCTGGATATATATAGCAGAGTACTACTTTGACTAC	ARAPWIYIAEYYFDY	CAGTCCTATGACAGAGGTCTGGTTCTTTCTGTC	QSYDRGLVLSV	GAGGTGCAGCTGGTGGAGTCTGGGGGAGGCTTGGTCCAGCCTGGGGGGTCCCTGAGACTCTCCTGTGCAACCTCTGGATTCACGTTTAGTAGTTACTGGATGAGTTGGGTCCGCCAGGCTCCAGGGAAGGGGCTGGAGTGGGTGGCCAACATAAAGCCAGATGGAAGTGAGAAATACTATGTGGACTCTGTGAAGGGCCGATTCACCATCTCCAGAGACAACGCCAAGAACTCACTGTATCTGCAAATGAACAGCCTGAGAGCCGAGGACACGGCTGTGTATTACTGTGCGAGAGCCCCCTGGATATATATAGCAGAGTACTACTTTGACTACTGGGGCCAAGGAACCCTGGTCACCGTCTCCTCA	CAGTCTGTGCTGACGCAGCCGCCCTCAGTGTCTGGGGCCCCAGTGCAGAGGGTCGCCCTCTCCTGCACTGGGAGCAGCTCCAACATCGGGGCAGGTTATGATGTACACTGGTACCAGCAGCTTCCAGGAACAGCCCCCAAACTCCTCATCTATGGTAACAACAATCGGCCCTCAGGGGTCCCTGACCGATTCTCTGGCTCCAAGTCTGGCGCCTCAGCCTCCCTGGCCATCACTGGGCTCCAGGCTGAGGATGAGGCTGATTATTACTGCCAGTCCTATGACAGAGGTCTGGTTCTTTCTGTCTTCGGAACTGGGACCAAGGTCACCGTCCTA
399	IML3695	Post-vax	ADI-67238	IGHV3-30*18	IGHD1-26*01	IGHJ3*02	IGKV2-30*01	IGKJ5*01	6.1	2.3	S2	Yes						GCGAATGGGGCGCCCAGTGGGGATGATGCTTTTGATATC	ANGAPSGDDAFDI	ATGCAAGGTTCACACTGGCCTCCGATCACC	MQGSHWPPIT	CAGGTGCAGCTGGTGGAGTCTGGGGGAGGCGTGGTCCAGCCTGGGAGGTCCCTGAGACTCTCCTGTACAGCCTCTGGATTCACCTTCAGTAATTATGGCATGCACTGGGTCCGCCAGGCTCCAGGCAAGGGGCTGGAGTGGGTGGCAACTATTTCATATGAAGGCAGTCAAAGACACTATGTAGACTCCGTAAAGGGCCGATTCACCATCTCCAGAGACAATTCCAAGAATACGTTGTATCTGGAAATGAACAGCCTGAGACCTGAGGACACGGCTGTGTATTACTGTGCGAATGGGGCGCCCAGTGGGGATGATGCTTTTGATATCTGGGGCCAAGGGACAATGGTCACCGTCTCTTCA	GATGTTGTGATGACTCAGTCTCCACTCTCCCTGCCCGTCACCCTTGGGCAGCCGGCCTCCATCTCCTGCAGGTCTAGTCAAAGCCTCGTATACAGTGATGGAAAGACTTACTTGAATTGGTTTCAGCAGAGGCCAGGCCAGTCTCCAAGGCGCCTAATTTATAAGGTTTCTAACCGGGACTCTGGGGTCCCAGACAGATTCAGCGGCAGTGGGTCAGGTACTGATTTCACACTGAAAATCAGCAGGGTGGAGGCTGAGGATGTTGGGGTCTATTACTGCATGCAAGGTTCACACTGGCCTCCGATCACCTTCGGCCAAGGGACACGACTGGAGATTAAA
400	IML3694	Post-vax	ADI-67459	IGHV1-69*01	IGHD4-17*01	IGHJ4*02	IGKV3-20*01	IGKJ1*01	5.8	2.4	S2	Yes						GCGACAGCTCACGTTGCTTACGGTGACTACGTCCCCTCTGACTAC	ATAHVAYGDYVPSDY	CAGCAGTATGGTACCTCACCCCCGTGGACG	QQYGTSPPWT	CAGGTGCAGCTGGTGCAGTCTGGGGCTGAGGTGAAGAAGCCTGGGTCCTCGGTGAAGGTCTCCTGCAAGGCCTCTGGAGACACCTTCAGCATTTATGCTTTCAGCTGGGCGCGACAGGCCCCTGGACAAGGGCTTGAGTGGATGGGAGGGACCATCCCTAGCCTTGATTCAGTAAACTACGCACAGAAGTTTCAGGGCAGAGTCACGATTACCGCGGACGAATCCACGAGCACAGCCTTCATGGAGCTGAACAGCCTGAGATCTGAGGACACGGCCGTATATTACTGTGCGACAGCTCACGTTGCTTACGGTGACTACGTCCCCTCTGACTACTGGGGCCAAGGAACCCTGGTCACCGTCTCCTCA	GAAATTGTGTTGACGCAGTCTCCAGGCACCCTGTCTTTGTCTCCAGGAGAAAGAGCCACCCTCTCCTGCAGGGCCAGCCAGAGTGTTAGCAGCAACTACTTAGCCTGGTACCAGCAGAAACCTGGCCAGGCTCCCAGGCTCGTCATCTATGGTGCATCCAGCAGGGCCACTGGCATCCCAGACAGGTTCAGTGGCAGTGGGTCTGGGACAGACTTCACTCTCACCATCAGCAGACTGGAGCCTGATGATTTTGCAGTGTATTACTGTCAGCAGTATGGTACCTCACCCCCGTGGACGTTCGGCCAAGGGACCAAGGTGGAAATCAAA
401	IML3694	Post-vax	ADI-67460	IGHV1-69*01	IGHD3-10*01	IGHJ6*02	IGKV3-11*01	IGKJ4*01	4.1	1.4	S2	No						GCGAATGAGAGGACGTTGATTCAGGGAGATTTATACGGTATGGACGTC	ANERTLIQGDLYGMDV	CAGTACCGTAGCAACTGGCCTCCCCGACTCACT	QYRSNWPPRLT	CAGGTGCAGCTGGTGCAGTCTGGGGCTGAGGTGAAGAAGCCTGGGTCCTCGGTGAAGGTCTCCTGCAAGACTTCTGGGGGCACCTTCAGCAACTTTGCTATCAGCTGGGTGCGACAGGCCCCTGGACAAGGGCTTGAGTGGATGGGAGGGATCATCCCTGTCTTTGGTACAACAAAGTACGCACAGAAGTTCCAGGGCAGAGTCACCCTTACCGCGGACGAATCCACGACCACAGCCTACATGGAGCTGAGAAGCCTGAGATCTGAGGACACGGCCGTGTATTTCTGTGCGAATGAGAGGACGTTGATTCAGGGAGATTTATACGGTATGGACGTCTGGGGGCAAGGGACCACGGTCACCGTCTCCTCA	GAAATTGTGTTGACACAGTCTCCAGGCACCCTGTCTTTGTCTCCAGGGGAAAGAGCCACCCTCTCCTGCAGGGCCAGTCAGAGTGTTAGCAGCTACTTAGCCTGGTACCAACAGAAACCTGGCCAGGCTCCCAGGCTCCTCATCTATGATGCATCCAACAGGGCCACTGGCATCCCACCCAGGTTCAGTGGCAGTGGGTCTGGGACAGACTTCACTCTCACCATCAGCAGCCTAGAGCCTGAAGATTTTGCAGTTTATTACTGTCAGTACCGTAGCAACTGGCCTCCCCGACTCACTTTCGGCGGAGGGACCAAGGTGGAGATCAAA
402	IML3694	Post-vax	ADI-67461	IGHV3-33*01	IGHD6-13*01	IGHJ3*02	IGLV3-25*01	IGLJ2*01	4.8	4.5	Undefined	No						GTGACTACTTACAGCAGCGACTTCGTCGATGGTTTCGATGTC	VTTYSSDFVDGFDV	CAATCAGCAGACAGCAGTGGTTCCTATGTGGTT	QSADSSGSYVV	CAGGTGCAGCTGGTGGAGTCTGGGGGAGGCGTGGTCCAACCTGGGAGGTCCCTGAGACTCTCATGTGCAGCGTCTGGACTCACCTTCAGTAACTATGGCATGCACTGGGTCCGCCAGGCTCCAGGCAAGGGGCTGGAGTGGGTGGCACTTATATGGTATGATGGAACTATTCAATACTATGCAGACTCCGTGAAGGGCCGATTCACCATCTCCAGAGACAATTCCAAGAACACCTTGTATCTGCAAATGAACAGCCTGAGAGCCGAGGACACGGCTGTCTATCGCTGTGTGACTACTTACAGCAGCGACTTCGTCGATGGTTTCGATGTCTGGGGCCAAGGGACAATGGTCACCGTCTCTTCA	TCCTATGAGCTGATGCAGCCACCCTCGGTGTCAGTGTCCCCAGGACAGACGGCCAGGATCACCTGCTCTGGAGATGCATTGCCAAAGAAATTTGCTTATTGGTACCAGCAGAAGCCAGGCCAGGCCCCTGTGGTGCTGATATATAAAGACACTGAGAGGCCCTCAGGGATTCCTGCGCGATTCTCTGGCTCCACCTCAGGGACAACAGTCACATTGACCATCAGTGGAGTCCAGGCAGAAGACGAGGCTGACTATTATTGTCAATCAGCAGACAGCAGTGGTTCCTATGTGGTTTTCGGCGGAGGGACCAAGCTGACCGTCCTA
403	IML3694	Post-vax	ADI-67462	IGHV3-30*18	IGHD1-26*01	IGHJ3*02	IGKV3-15*01	IGKJ1*01	6.5	1	S2	No						GCGAAATCAGTAGGTGGAACCTACTACGGGGCTTTTGATATC	AKSVGGTYYGAFDI	CAGCAGTATAATAACTGGCCTCCGAATACG	QQYNNWPPNT	CAGGTGCAGCTGGTGGAGTCTGGGGGAAGCGTGGTCCAGCCTGGGAGGTCCCTGAGACTCTCCTGTGCAGCCTCTGGATTCACCTTCAGTGGCTATGCCATGCACTGGGTCCGCCAGGCCCCAGGCAAGGGGCTGGAGTGGGTGGCAGTTGTTTCATATGATGGAAGTAATAAATATTACGCAGACTCCGTGAGGGGCCGATTCAGTATCTCCAGAGACAATTCAAAGAACACGCAGGATCTGCAAATGAACTCCCTGAAAACTGAGGACACGGCTGTGTATTATTGTGCGAAATCAGTAGGTGGAACCTACTACGGGGCTTTTGATATCTGGGGCCAAGGGACAATGGTCACCGTCTCTTCA	GAAATAGTGATGACGCAGTCTCCAGCCACCCTGTCTGTGTCTCCAGGGGAAAGAGCCACCCTCTCCTGCAGGGCCAGTCAGAGTGTTAGCAGCAACTTAGCCTGGTACCAACAGAAACCTGGCCAGGGTCCCAGGCTCCTCATCTCTGGTGCATCCACCAGGGCCACTGGTATCCCAGCCAGGTTCAGTGGCAGTGGGTCTGGGACAGAGTTCACTCTCACCATCAGCAGCCTGCAGTCTGAAGATTTTGCAGTTTATTACTGTCAGCAGTATAATAACTGGCCTCCGAATACGTTCGGCCAAGGGACCAAGGTGGAAATCAAA
404	IML3694	Post-vax	ADI-67463	IGHV4-59*01	IGHD2-15*01	IGHJ5*02	IGKV3-15*01	IGKJ1*01	6.3	2.8	Undefined	No						GCGAGAGAAGCTCTGCTTCCGGGGATTGTAGGCAAGTTTACCTGGTTTGACCCC	AREALLPGIVGKFTWFDP	CTGCAGTATAATATCTGGCCTCGGGCG	LQYNIWPRA	CAGGTGCAGCTGCAGGAGTCGGGCCCAGGACTGGTGAAGCCTTCGGAGACCCTGTCCCTCACCTGCACTGTCTCTGGTTCCTCCATCAGTAGTTACTACTGGAGCTGGATCCGGCAGCCCCCAGGGAAGGGACTGGAGTGGCTTGGATATATTTATTACAGTCGGACCACCAAGACCACCAACTACAACCCCTCCCTCAAGAGTCGAGTCACCATATCAGTGGACACGTCCAAGAACCAGCTCTCCCTGAAGCTGAGCTCTGTGACCGCTGCGGACACGGCCGTCTATTACTGTGCGAGAGAAGCTCTGCTTCCGGGGATTGTAGGCAAGTTTACCTGGTTTGACCCCTGGGGCCAGGGAACCCTGGTCACCGTCTCCTCA	GAAATAGTGATGACGCAGTCTCCAGCCACCCTGTCTGTGTCTCCAGGGGAAAGAGCCACCCTCTCTTGCAGGCCCAGTCAGAGTGTTGGCAGCAACTTGGCCTGGTACCAGCAGAAACCTGGCCAGGCTCCCAGGCTCCTCATCTCTGGTGCATCCACCAGGGCCACTGGTATCCCAGCCAGGTTCAGTGGCAGTGGGTCTGGGACAGAGTTCACTCTCACCATCAGCAGCCTGCAGTCTGAAGATTTTGCAATTTATTACTGTCTGCAGTATAATATCTGGCCTCGGGCGTTCGGCCAAGGGACCAAGGTGGAAATCAAA
405	IML3694	Post-vax	ADI-67464	IGHV3-7*01	IGHD3-22*01	IGHJ5*02	IGKV1-17*01	IGKJ2*01	4.1	0.7	NTD	No						GCGAGAGATTTCAAGCAAACAGATTACTATGATACTACTGTTTATCTCAACTGGTTCGACCCC	ARDFKQTDYYDTTVYLNWFDP	CTACAGCATAATAGTTACCCTCCGACG	LQHNSYPPT	GAGGTGCAGCTGGTGGAGTCTGGGGGAGGCTTGGTCCACCCTGGGGGGTCCCTGAGACTCTCCTGTGCAGCCTCTGGATTCACCTTTAGTACCTATTGGATGAGCTGGGTCCGCCAGGCTCCAGGAAAGGGGCTGGAGTGGGTGGCCAACGTAAATGTGGATGGCAGTGAGAAATACTATGTGGACTCTGTGAGGGGCCGATTCACCATCTCCAGAGACAACGCCAAGAACTCACTGTTTCTGCAAATGAACAGCCTGAGAGCCGAGGACACGGCTGTTTATTACTGTGCGAGAGATTTCAAGCAAACAGATTACTATGATACTACTGTTTATCTCAACTGGTTCGACCCCTGGGGCCAGGGAACCCTGGTCACCGTCTCCTCA	GACATCCAGATGACCCAGTCTCCATCCTCCCTGTCTGCATCTGTAGGAGACAGAGTCACCATCACTTGCCGGGCAAGTCAGGGCATTAGAAATGATTTAGGCTGGTATCAGCAGAAACCAGGGAAAGCCCCTAAGCGCCTGATCTATGCTGTATCCAGTTTGCAAAGTGGGGTCCCATCAAGGTTCAGCGGCAGTGGATCTGGGACAGAATTCACTCTCACAATCAGTAGCCTGCAGCCTGAAGATTTTGCAACTTATTACTGTCTACAGCATAATAGTTACCCTCCGACGTTTGGCCAGGGGACCAAGCTGGAGATCAAA
406	IML3694	Post-vax	ADI-67465	IGHV3-30-3*01	IGHD5-12*01	IGHJ4*02	IGKV3-20*01	IGKJ4*01	4.1	0.7	S2	No						GTGCGAGGACGCGGCGGCTACGAGACCTACTTTGACTAC	VRGRGGYETYFDY	CAGCAGTATGGTAGCTCACCTCTCACT	QQYGSSPLT	CAGGTGCAGCTGGTGGAGTCTGGGGGAGGCGTGGTCCAGCCTGGGAGGTCCCTGAGACTCTCCTGTGCAGCCTCTGGATTCACCTTCAGTATCTATGCTATCCACTGGGTCCGCCAGGCTCCAGGCAAGGGGCTGGAGTGGGTGGCAGTTATATCATATGATGGAAACAATGAATACTACGCAGACTCCGTGAAGGGCCGATTCGCCATCTCCAGAGACAATTCCAAGAACACGCTCTATTTGCAAATGAACAGCCTCAGAGCTGAAGACACGGCTGTCTATTACTGTGTGCGAGGACGCGGCGGCTACGAGACCTACTTTGACTACTGGGGCCAAGGAACCCTGGTCACCGTCTCCTCA	GAAATTGTGTTGACGCAGTCTCCAGGCACCCTGTCTTTGTCTCCAGGGGAAAGAGCCACCCTCTCCTGCAGGGCCAGTCAGAGTGTTAGCAGAAACTACTTAGCCTGGTACCAGCAGAAACCTGGCCAGGCTCCCAGGCTCCTCATCTATGGTGCATCCAGCAGGGCCACTGGCATCCCAGACAGGTTCAGTGGCAGTGGGTCTGGGACAGACTTCACTCTCACCATCAGCAGACTGGAGCCTGAAGATTTTGCAGTGTATTACTGTCAGCAGTATGGTAGCTCACCTCTCACTTTCGGCGGAGGGACCAAGGTGGAGATCAAA
407	IML3694	Post-vax	ADI-67466	IGHV3-11*01	IGHD1-20*01	IGHJ4*02	IGKV1-39*01	IGKJ4*01	5.1	5.6	RBD	No		>1.0	>1.0			GCGAGAGATCAGGGCCGTTTAACTGGAACGACGACCAATTTTGACTGC	ARDQGRLTGTTTNFDC	CAACAGAGTAACAGTATCCCCCTCACT	QQSNSIPLT	CAGGTGCAGCTGGTGGAGTCTGGGGGAGGCTTGGTCAAGCCTGGAGGGTCCCTGAGACTCTCCTGTGCAGCCTCTGGATTCACCTTCAGTGACTATTATATGAGTTGGATCCGCCAGGCTCCAGGGGAGGGGCTGGAGTGGATTTCATTGATTACTAGTAGTGGTAGTGCCATATACTACGCAGACTCTGTGAAGGGCCGATTCACCATCTCCAGGGACAACGCCGAGAACTCACTATATCTGCAAATACACACCCTGAGGGCCGAGGACACGGCCGTGTATTACTGTGCGAGAGATCAGGGCCGTTTAACTGGAACGACGACCAATTTTGACTGCTGGGGCCAAGGAACCCTGGTCACCGTCTCCTCA	GACATCCAGATGACCCAGTCTCCATCCTCCCTGTCTGCATCTGTCGGAGACAGAGTCACCCTCACTTGCCGGGCAAGTCAGAGCATTAGCAGTTTTTTAAATTGGTATCAACAGAAACCAGGGAAAGCCCCCAAACTCTTGATTTATGCTGCATCCAGGTCGCAAAGTGGGGTCCCATCAAGGTTCAGTGGCAGTGGATCTGGGACAGATTTCACTCTCACCATCAACGGTCTGCAACCTGAAGATTTTGCAAGTTACTACTGTCAACAGAGTAACAGTATCCCCCTCACTTTCGGCGGAGGGACCAAGGTGGAGATCAAA
408	IML3694	Post-vax	ADI-67467	IGHV1-69*01	IGHD4-17*01	IGHJ4*02	IGKV3-20*01	IGKJ1*01	5.8	2.1	RBD	No		>1.0	>1.0	>1.0		GCGACAGCTCACGTTGCTTACGGTGACTACGTCCCCTCTGACTAC	ATAHVAYGDYVPSDY	CAGCAGTATGGTACCTCACCCCCGTGGACG	QQYGTSPPWT	CAGGTGCAGCTGGTGCAGTCTGGGGCTGAGGTGAAGAAGCCTGGGTCCTCGGTGAAGGTCTCCTGCAAGGCCTCTGGAGACACCTTCAGCATTTATGCTTTCAGCTGGGCGCGACAGGCCCCTGGACAAGGGCTTGAGTGGATGGGAGGGACCATCCCTAGCCTTGATTCAGTAAACTACGCACAGAAGTTTCAGGGCAGAGTCACGATTACCGCGGACGAATCCACGAGCACAGCCTTCATGGAGCTGAACAGCCTGAGATCTGAGGACACGGCCGTATATTACTGTGCGACAGCTCACGTTGCTTACGGTGACTACGTCCCCTCTGACTACTGGGGCCAAGGAACCCTGGTCACCGTCTCCTCA	GAAATTGTGTTGACGCAGTCTCCAGGCACCCTGTCTTTGTCTCCAGGAGAAAGAGCCACCCTCTCCTGCAGGGCCAGTCAGAGTGTTAGCAGCAACTACTTAGCCTGGTACCAGCAGAAACCTGGCCAGGCTCCCAGGCTCGTCATCTATGGTGCATCCAGCAGGGCCACTGGCATCCCAGACAGGTTCAGTGGCAGTGGGTCTGGGACAGACTTCACTCTCACCATCAGCAGACTGGAGCCTGATGATTTTGCAGTGTATTACTGTCAGCAGTATGGTACCTCACCCCCGTGGACGTTCGGCCAAGGGACCAAGGTGGAAATCAAA
409	IML3694	Post-vax	ADI-67468	IGHV3-30*18	IGHD6-6*01	IGHJ4*02	IGKV4-1*01	IGKJ4*01	5.8	2.6	S2	No						GCGAAAGGGCGGGGGGGATATAGCAGCTCTCTTTAC	AKGRGGYSSSLY	CAGCAATATTATAGTCCTCCTCCTCTCACT	QQYYSPPPLT	CAGGTGCAGCTGGTGGAGTCTGGGGGAGGCGTGGTCCAGCCTGGGGGGTCCCTGACACTCTCCTGTGCAGCCTCTGGATTCGCCTTCACTGGCTTTGCCATACACTGGCTCCGCCAGGCGCCAGGCAAGGGGCCGGAGTGGGTGGCAGTTATATCATATGATGGAATTAATAGATACTATGCAGACTCCGTGAAGGGCCGATTCACCATCTCCAGAGACAATTCCAAGAACACGCTGTATCTGCAAATGAGCAGCCTGAGAGCTGAAGACGCGGCTATGTATTACTGTGCGAAAGGGCGGGGGGGATATAGCAGCTCTCTTTACTGGGGCCAAGGAACCCTGGTCACCGTCTCCTCA	GACATCGTGATGACCCAGTCTCCTGACTCCCTGGCTGTGTCTCTGGGCGAGAGGGCCACCATCAACTGCAAGTCCAGCCAGAGTGTTTTAAAAAGCTCCAACAATAAGAACTACTTAGCTTGGTACCAGCAGAAACCAGGACAGTCTCCTAAGCTGCTCATTGACTGGGCATCTACCCGGGAATCCGGGGTCCCTGACCGATTCAGTGGCAGCGGGTCTGGGACAGATTTCACTCTCACCATCAGCGGCCTGCAGGCTGAAGATGTGGCTGTTTATTACTGTCAGCAATATTATAGTCCTCCTCCTCTCACTTTCGGCGGAGGGACCAAGGTGGAGATCAAA
410	IML3694	Post-vax	ADI-67469	IGHV1-69*01	IGHD3-22*01	IGHJ4*02	IGKV3-11*01	IGKJ3*01	5.4	3.1	S2	No						GCGAGAGCCGGGACCTTTGATAGTAGTGGTTATTACGAAGACTAC	ARAGTFDSSGYYEDY	CAGCAACGTAGCAACTGGCCTCCGATATTCACT	QQRSNWPPIFT	CAGGTGCAGCTGGTGCAGTCTGGGGCTGAGGTTAAGAAGCCTGGGTCCTCGGTGAAGGTCTCCTGCAAGGCTTCTGGAGGCACCTTCAGCAACTCTGCTTTCTCCTGGGTGCGACAGGCCCCTGGACGAGGGCTTCAGTGGGTGGGAGGGATCATCCCTATCTTTGGTACAACAAACTACGCACAGAAGTTCCAGGGCAGAGTCACGATTACCGCGGACGCATCCACGAGCACAGCCTACATGGAGCTACGCAGCCTCAGATCTGAGGACACGGGCATGTATTACTGTGCGAGAGCCGGGACCTTTGATAGTAGTGGTTATTACGAAGACTACTGGGGCCAAGGAACCCTGGTCACCGTCTCCTCA	GAAATTGTGTTGACACAGTCTCCAGCCACCCTGTCTTTGTCTCCAGGGGAAAGAGCCACCCTTTCCTGCAGGGCCAGTCAGAGTGTTAGCAACTTTTTAGCCTGGTACCAACAAAAACCTGGCCAGGCTCCCAGGCTCCTCATTTATGATGCATCCAACAGGGCCACTGGCATCCCAGCCAGGTTCAGTGGCAGTGGGTTTGGGACAGAATTCACTCTCACCATCAGCAGCCTAGAGCCTGAAGATTTTGCAGTTTATTACTGTCAGCAACGTAGCAACTGGCCTCCGATATTCACTTTCGGCCCTGGGACCAAAGTGGATATCAAA
411	IML3694	Post-vax	ADI-67470	IGHV3-30*18	IGHD2-2*01	IGHJ4*02	IGKV1-5*03	IGKJ1*01	4.8	2.5	NTD	No						GCGAAAATGAGGGGCCTAGGATATTGTAGTGGTAGCAACTGCTATTTAGGCCAGTACTTTGACTAC	AKMRGLGYCSGSNCYLGQYFDY	CAACAGTATAATACTTATTTTTGGTGGACG	QQYNTYFWWT	CAGGTGCAGCTGGTGGAGTCTGGGGGAGGCGTGGTCCAGCCTGGGAGGTCTCTGAGACTCTCCTGTGCAGCCTCTGGATTCACGTTCAGTGACTTTGGCATGCACTGGGTCCGCCAGGCTCCAGGCAAGGGGCTGGAATGGGTGGCAGTTATATCATACGATGGAAGAAATAAATATTATGGAGACTCTGTGAAGGGCCGATTCACCATCTCCAGAGACAATTCCAAGAACACGCTGTATCTCCAAATGAACAGCCCGAGAGCTGACGACACGGCTGTGTATTACTGTGCGAAAATGAGGGGCCTAGGATATTGTAGTGGTAGCAACTGCTATTTAGGCCAGTACTTTGACTACTGGGGCCAAGGAACCCTGGTCACCGTCTCCTCA	GACATCCAGATGACCCAGTCTCCTTCCACCCTGTCTGCGTCTGTGGGAGACAGAGTCACCATCACTTGCCGGGCCAGTCAGACTATTAGTACCTGGTTGGCCTGGTATCAGCAGAAACCAGGGAAAGCCCCTAAGCTCCTCATCTATAAGGCGTCTACTTTAGAAAGTGGGGTCCCATCAAGGTTCAGCGGCAGTGGATCTGGGACAGAATTCACTCTCACCATCAGCAGCCTGCAGCCTGATGATTTTGCAACTTATTACTGCCAACAGTATAATACTTATTTTTGGTGGACGTTCGGCCAAGGGACCAAGGTGGAAATCAAA
412	IML3694	Post-vax	ADI-67471	IGHV2-5*02	IGHD5-12*01	IGHJ4*02	IGKV4-1*01	IGKJ4*01	2.3	1.3	RBD	No		0.4311		>1.0		GCACACAGCCCCTACCTGACTCGTGGATATAATACCTACGATGTGGGATACTTCTTTGACTAC	AHSPYLTRGYNTYDVGYFFDY	CAGCAATATTATAGTACTCCTCCGATT	QQYYSTPPI	CAGATCACCTTGAAGGAGTCTGGTCCTATGCTGGTGAAACCCACACAGACCCTCACGCTGACCTGCACCTTCTCTGGATTCTCACTCAGTACTAGTGGAGTGGGTGTGGGCTGGATCCGTCAGCCCCCAGGAAAGGCCCTGGAGTGGCTTGCACTCATTTATTGGGATGATAATAAGCGCTACAGCCCATCTCTGAGGAGCAGGCTCACCATCACCAAGGACACCTCCAAAAACCAGGTAGTCCTTACAATGATCAACATGGACCCTGTGGACACAGCCACATATTACTGTGCACACAGCCCCTACCTGACTCGTGGATATAATACCTACGATGTGGGATACTTCTTTGACTACTGGGGCCAAGGAACCCTGGTCACCGTCTCCTCA	GACATCGTGATGACCCAGTCTCCAGACTCCCTGGCTGTGTCTCTGGGCGAGAGGGCCACCATCAACTGCAAGTCCAGCCAGAGTGTTTTATACAGCTCCAACAATAAGAACTTCTTAGCTTGGTTCCAGCAGAAACCAGGACAGCCTCCTGAGCTGCTCATTTACTGGGCATCTACCCGCGAATCCGGGGTCCCTGACCGATTCAGTGGCAGCGGGTCTGGGACAGATTTCACTCTCACCATCAGCAGCCTGCAGGCTGAAGATGTGGCAGTTTATTACTGTCAGCAATATTATAGTACTCCTCCGATTTTCGGCGGAGGGACCAAGGTGGAGATCAAA
413	IML3694	Post-vax	ADI-67472	IGHV1-69*01	IGHD1-26*01	IGHJ4*02	IGKV3-11*01	IGKJ1*01	11.4	3.1	S2	No						GTGAGAGTTAACGGCCTTGACGCCATTAGGGAGACTCTAGACTAC	VRVNGLDAIRETLDY	CAGTATCGTAGCAACTGGCCTCCTATGTACACT	QYRSNWPPMYT	CAGGTGCAGCTGGTGCAGTCTGGGGCTGAGGTGAAGAAGCCTGGGTCCTCGGTGAAGGTCTCCTGCAAGGCTTCTGGAGGCACCTTCAGCAGTCACGCGATCACCTGGGTGCGACAGGCCCCTGGACAAGGGCTTGAGTGGATGGGAGGGATCATCCCTATCTTTGGTACAACAAACCACGCACAGAAGTTCCAGGGCAGATTCACAATTAACGAGGACAAATCCACGATTAGCGAAGACGAATCCACGAGCACAGTCCACATGGAGTTGAGCAGCCTGAGATCTGAGGACACGGCCGTGTATTACTGTGTGAGAGTTAACGGCCTTGACGCCATTAGGGAGACTCTAGACTACTGGGGCCAAGGAACCCTGGTCACCGTCTCCTCA	GAAATTGTGTTGACACAGTCTCCAGCCACCCTGTCTTTGTCTCCAGGGGAAAGAGCCACCCTCTCCTGCAGGGCCCGTCAGAGTGTTAGCAGCTTCTTAGCCTGGTACCAACAAAAACCTGGCCAGGCTCCCAGGCTCCTCATCTATGATGCATCCAACAGGGCCACTGGCATCCCAGCCAGGTTCAGTGGCAGTGGGTCCGGGACAGACTTCGCTCTCACCATCAACAGCCTAGAGCCTGAGGATTTTGCAGTTTATTACTGTCAGTATCGTAGCAACTGGCCTCCTATGTACACTTTCGGCCAAGGGACCAAGGTGGAAATCAAA
414	IML3694	Post-vax	ADI-67473	IGHV1-46*03	IGHD3-9*01	IGHJ4*02	IGLV3-21*03	IGLJ3*02	4.4	2.8	RBD	No						GCTAGCTCACACCAGAATATTTTGACTGGTTATATTGACTAC	ASSHQNILTGYIDY	CAGGTGTGGGAGAGTCGTGGTGATCATTGGGTG	QVWESRGDHWV	CAGGTGCAGCTGGTGCAGTCTGGGGCTGAGATGAAGAAGCCTGGGGCCTCAGTGAAGATTTCCTGCAAGGCATCTGGATACACCTTCACCAGCCACTATATGCACTGGGTGCGACAGGCCCCTGGACAAGGGCTTGAGTGGATGGGACTAATCAACCCTGATGGTGGTAGTACAACCTACGCACAGAAGTTCCAGGGCAGAGTCACCATGACCAGGGACACGTCCACGAGCACAGTCCACATGGAGCTGAGCAGCCTGAGATCTGACGATATGGGCGTGTATTACTGTGCTAGCTCACACCAGAATATTTTGACTGGTTATATTGACTACTGGGGCCAAGGAACCCTGGTCACCGTCTCCTCA	TCCTATGTGCTGACTCAGCCACCCTCGGTGTCAGTGGCCCCAGGAAAGACGGCCACCATTACCTGTGGGGGAAACAACATTGGAAGTAAAAATGTGCACTGGTACCAGCAGAAGCCAGGCCAGGCCCCTGTACTGGTCGTCTATGATGATAGCGACCGGCCCTCAGGGATCCCTGAGCGATTTTCTGGCTCCAACTCTGGGAACACGGCCACCCTGACCATCAGCAGGGTCGAAGCCGGGGATGAGGCCGACTATTACTGTCAGGTGTGGGAGAGTCGTGGTGATCATTGGGTGTTCGGCGGAGGGACCAAGCTGACCGTCCTA
415	IML3694	Post-vax	ADI-67474	IGHV1-18*01	IGHD4-17*01	IGHJ4*02	IGKV3-20*01	IGKJ2*01	4.4	1.4	RBD	No		>1.0	>1.0	>1.0		GCGAGAGACCCGGGATCATTTGGTACGGTGGCTGACTAC	ARDPGSFGTVADY	CAGCAGTACGGTTATTCAGTGTACACT	QQYGYSVYT	CAGGTTCAGCTGGTGCAGTCTGGAGCTGAAGTGAAGAAGCCTGGGGCCTCAGTGAAGGTCTCCTGCAAGGCTTCTGGTTACACCTTTAACAGCTATGGTATCAACTGGGTGCGACAGGCCCCTGGACAAGGGCTTGAGTGGATGGGATGGATCAGCGGTTACAACCATAACACAGACTATGCACAGAAGTTCCAGGACAGAGTCACCATGACCACAGACACATCCACGAGCACAGCCTACATGGACCTGAGGAGCCTGAGATCTGACGACACGGCCGTTTATTATTGTGCGAGAGACCCGGGATCATTTGGTACGGTGGCTGACTACTGGGGCCAAGGAACCCTGGTCACCGTCTCCTCA	GAAATTGTGTTGACGCAGTCTCCAGGCACCCTGTCTTTGTCTCCAGGGGAAAGAGCCACCCTCTCCTGCAGGGCCCGTCAGAGTGTTAGCAGCAGCTTCTTAGCCTGGTACCAGCAGAAACCTGGCCAGGCTCCCAGGCTCCTCATCTATGGTGCATCCAGCAGGGCCACTGGCATCCCAGACAGGTTCAGTGGCAGTGGGTCTGGGACAGACTTCACTCTCACCATCAGCAGACTGGAGCCTGAAGATTTTGCGGTGTATTACTGTCAGCAGTACGGTTATTCAGTGTACACTTTTGGCCAGGGGACCAAGCTGGAGATCAAA
416	IML3694	Post-vax	ADI-67475	IGHV3-23*01	IGHD3-22*01	IGHJ3*02	IGKV4-1*01	IGKJ2*01	9.8	2	RBD	No		>1.0				GCGAAAGGGAGTAGTGGGGCCTATCCCGGGAGTCGGACTTTTGATATC	AKGSSGAYPGSRTFDI	CAGCAATATTGTAGAACTCCGTACACT	QQYCRTPYT	GAGGTGCAGCTGTTGGAGTCTGGGGGAGGCTTGGTACAGCCTGGGGGGTCCCTGAGACTCTCCTGTGCAGCCTCTGGATTCACCTTTAGCAGCCATGCCATGACTTGGGTCCGCCAGGCTCCAGGGAAGGGGCTCCAGTGGGTCTCCACTATTAGCACTAGTGGTGACGACACATTCTACGCAGACTCCCTGAAGGGCCGGATCACCATCTCCAGAGACAACTCCAGGAACACCCTATACTTAGAAATGAATAGTCTCAGAGGCGAGGACACGGCCGTATATTACTGTGCGAAAGGGAGTAGTGGGGCCTATCCCGGGAGTCGGACTTTTGATATCTGGGGCCAAGGGACAATGGTCACCGTCTCTTCA	GACATCGTGATGACCCAGTCTCCAGACTCCCTGGCTGTGTCTCTGGGCGAGAGGGCCACCATCAACTGCAAGTCCAGCCAGAATGTTTTATACAGCTCCAACAATAAGAACTGCTTAGCTTGGTACCAGCAGAAACCAGGACAGCCTCCTAACCTCCTCATTTACTGGGCATCTACCCGGGAATCCGGGGTCCCTGACCGATTCAGTGGCAGCGGGTCTGGGACAGATTTCACTCTCACCATCAGCAGCCTGCAGGCTGAAGATGTGGCAGTTTATTACTGTCAGCAATATTGTAGAACTCCGTACACTTTTGGCCAGGGGACCAAGCTGGAGATCAAA
417	IML3694	Post-vax	ADI-67476	IGHV4-59*01	IGHD3-22*01	IGHJ6*02	IGKV1-9*01	IGKJ3*01	3.1	2.5	S2	No						GCGACCTATTACTATGATAGTAGTGGTTGGCAATACGGTATGGACGTC	ATYYYDSSGWQYGMDV	CAACAGCTTAATAGTTACCCCCTCACT	QQLNSYPLT	CAGGTGCAGCTGCAGGAGTCGGGCCCAGGACTGGTAAAGCCTTCGGAGACCCTGTCCCTCACCTGCACTGTCTCTGGTGCCTCCATCAGTAGTTACTACTGGACCTGGATCCGGCAGCCCCCAGGGAAGGGACTGGAGTGGATTGGGTATATCTATTACAATGGGGACACCAACTACAACCCCTCCCTCAAGAGTCGAGTCACCATATCACTAGACACGTCCAAGAACCAGTTCTCCCTGAAGCTGAGCTCTGTTACCGCTGCGGACACGGCCGTATATTACTGTGCGACCTATTACTATGATAGTAGTGGTTGGCAATACGGTATGGACGTCTGGGGGCAAGGGACCACGGTCACCGTCTCCTCA	GACATCCAGTTGACCCAGTCTCCATCCTTCCTGTCTGCATCTGTAGGAGACAGAGTCACCATCACTTGCCGGGCCAGTCAGGGCATCAGCAGTCATTTGGCCTGGTATCAGCAAAAACCAGGGAAAGCCCCTAAGCTCCTGATCTATGGTACATCCACTTTGCAAAGTGGGGTCCCATCAAGGTTCAGCGGCAGTGGGTCTGGGACAGAATTCACTCTCACAGTCAGCAGCCTGCAGCCTGAAGATTTTGCAACTTATTACTGTCAACAGCTTAATAGTTACCCCCTCACTTTCGGCCCTGGGACCAAAGTGGATATCAAA
418	IML3694	Post-vax	ADI-67477	IGHV4-59*01		IGHJ2*01	IGKV3-20*01	IGKJ1*01	3.1	3.8	S2	No						GCGAGGGGCTTCGATCTC	ARGFDL	CTTCAGTATGGGAGCTCACCGTGGACG	LQYGSSPWT	CAGGTGCAGCTGCAGGAGTCGGGCCCAGGACTGGTGAAGCCTTCGGAGACCCTGTCCCTCACCTGCACTGTCTCTGGTGACTCCATCACTAATTACTACTGGAGCTGGATCCGGCAGCCCCCAGGGAAGGGACTGGAGTGGATTGGGTATATTTATTCCAGTGGGAGCACCAACTACAACCCCTCCCTCAAGAGTCGAGTCACCATATCAGTCGACACGTCCAAGAACCAAGTCTCCCTGAAGCTGAGCTCTGTGACCGCTGCGGACACGGCCGTCTATTACTGTGCGAGGGGCTTCGATCTCTGGGGCCGTGGCACCCTGGTCACTGTCTCCTCA	GAAATTGTGTTGACGCAGTCTCCAGGCACCCTGTCTTTGTCTCCAGGGGAAAGAGCCGCCCTCTCCTGCAGGGCCAGTCAGAGTGTTAGCAGCAACTACTTAGCCTGGTACCAGCAGAAACCTGGCCAGGCTCCCAGGCTCCTCATCTATGCCACATCCAGCAGGGCCATTGGCATCCCAGACAGGTTCAGTGGCAGTGGGTCTGGGACAGACTTCACTCTCACCATCAGCAGACTGGAGCCTGAAGATTTTGCACTCTATTACTGTCTTCAGTATGGGAGCTCACCGTGGACGTTCGGCCAAGGGACCAAGGTGGAAATCAAA
419	IML3694	Post-vax	ADI-67478	IGHV3-23*01	IGHD1-20*01	IGHJ1*01	IGKV3-20*01	IGKJ1*01	6.5	3.1	S2	No		0.813	>1.0	>1.0		GCGACTCACCGCGGGACGGTATTCTTCCTCACT	ATHRGTVFFLT	CAGCAGTATGGTGGCTCACCTCCGACG	QQYGGSPPT	GAGGTGCAGCTGGTGGAGTCTGGGGGAGGCTTGGTACAGCCTGGAAAATCCCTAAGACTCTCCTGTGCAGGCTCTGGATTCACCTTTAGCAGTTACGCCATGAGCTGGGTCCGCCAGGCTCCAGGAAAGGGGCTGCAGTGGGTCTCTACTATTAGTGGTGGTGGTGGTGGCACATACTACGCAGACTCCGTGAAGGGCCGGTTCACCATCTCCAGAGACAATTCCAAGAACACGCTGTATCTGCAAATGGACAGTCTTAGAGCCGAGGACACGGCCATATATTACTGTGCGACTCACCGCGGGACGGTATTCTTCCTCACTTGGGGCCAGGGCACCCTGGTCACCGTCTCCTCA	GAAATTGTGTTGACGCAGTCTCCAGGCACCCTGTCTTTGTCTCCAGGTGAAAGAGCCACCCTATCCTGCAGGGCCAGTCAGAGTGTTACCAGCAACTACTTAGCCTGGTACCAACAGAAACCTGGCCAGGCTCCCAGACTCCTCATCTATGGTGCATCCAGCAGGGCCACTGGCATCCCAGACAGGTTCAGTGGCAGTGGGTCTGGGACAGACTTCACTCTCACCATCAACAGACTGGAGCCTGAAGATTTTGCAGTGTATCACTGTCAGCAGTATGGTGGCTCACCTCCGACGTTCGGCCAAGGGACCAAGGTGGAAATCAAA
420	IML3694	Post-vax	ADI-67479	IGHV3-30-3*01	IGHD3-16*02	IGHJ5*02	IGKV3-20*01	IGKJ5*01	6.1	2.1	S2	No						GCGAGAGCCGAGACCTACGTCTCCTGGTTCGACCCC	ARAETYVSWFDP	CAGCAGTATGGTAGCTCACCGATCACC	QQYGSSPIT	CAGGTGCAGCTGGTGGAGTCTGGGGGAGGCGTGATCCAGCCTGGGAGGTCCCTGAGACTCTCCTGTGCAGCCTCTGGATTCATCTTCAATATCTATGCCATGCACTGGGTCCGCCAGGCTCCAGGCAAGGGGCCGGAGTGGCTGGCGGTTATATCATATGATGGAGTCAATAAATACTACGCAGACGCCGTGAGGGGCCGATTCACCATCTCCAGAGACAATTCCAAGAACACAGTGTATCTGCAAATGAACAGCCTGACCACTGACGACACGGCTGTGTATTACTGTGCGAGAGCCGAGACCTACGTCTCCTGGTTCGACCCCTGGGGCCAGGGAACCCTGGTCACCGTCTCCTCA	GAAATTGTGTTGACGCAGTCTCCAGGCACCCTGTCTTTGTCTCCAGGGGAAAGAGCCACCCTCTCCTGCAGGGCCAGTCAGAGTGTTAGCAACAACTACTTAGCCTGGTACCAGCAGAAACCTGGCCAGCCTCCCAGGCTCCTCATCTATGGTGCATCCAGCAGGGCCACTGGCATCCCAGACAGGTTCAGTGGCAGTGGGTCTGGGACAGACTTCACTCTCACCAGCGCCAGACTGGAGCCTGAAGATTTTGCAGTGTATTACTGTCAGCAGTATGGTAGCTCACCGATCACCTTCGGCCAAGGGACACGACTGGAGATTAAA
421	IML3694	Post-vax	ADI-67481	IGHV3-53*02	IGHD1-26*01	IGHJ4*02	IGKV1-9*01	IGKJ1*01	2	2.1	RBD	No	0.005792	0.0589	>1.0	0.1227		GCGAGAGATCTAGACGTCATGGGAGGCTTTGACTAT	ARDLDVMGGFDY	CAAGAGCTTAATAGTTACCCTCGCACT	QELNSYPRT	GAGGTGCAGCTGGTGGAGTCTGGAGGAGGCTTGATCCAGCCTGGGGGGTCACTGAGACTCTCCTGTGCAGCCTCTGGGGTCACCGTCAGTAGCAACTACATGAGCTGGGTCCGCCAGGCTCCAGGGAAGGGGCTGGAGTGGGTCTCAGTTATTTATAGCGGTGGTACCACATTCTACGCAGACTCCGTGAAGGGCCGATTCACCATCTCCAGAGACAATTCCAAGAACACGCTGTATCTTCAAATGAACAGCCTGAGAGCCGAGGACACGGCCGTATATTACTGTGCGAGAGATCTAGACGTCATGGGAGGCTTTGACTATTGGGGCCAAGGAACCCTGGTCACCGTCTCCTCA	GACATCCAGTTGACCCAGTCTCCATCCTTCCTGTCTGCATCTGTAGGAGACAGAGTCACCATCACTTGCCGGGCCAGTCAGGGCATGAGCAATTTTTTAGCCTGGTATCAGCAAAAACCAGGGAAAGCCCCCAAGCTCCTGATCTATGCTGCATCCACTTTGCAAAGTGGGGTCCCATCAAGGATCAGCGGCAGTGGATCTGGGACAGAATTCACTCTCACAATCAGCAGCCTGCAGCCTGAAGATTTTGCAACTTATTACTGTCAAGAGCTTAATAGTTACCCTCGCACTTTCGGCCAAGGGACCAAGGTGGAAATCAAA
422	IML3694	Post-vax	ADI-67482	IGHV3-30-3*01	IGHD3-22*01	IGHJ3*02	IGKV3-20*01	IGKJ1*01	6.1	2.8	S2	No						GCGAGAACCCTAGGTGGTAATTACCAGGGTGCTTTTGATATC	ARTLGGNYQGAFDI	CAGCAGTATGGTAGTTTACCTCCGACG	QQYGSLPPT	CAGGTGCAGCTGGTGGAGTCTGGGGGAGGCGTGGTCCAGCCTGGGAGGTCCCTGAGACTCTCCTGTGCAGCCTCTGGATTCGCCTTCACTACCTTTAGTCTTTACTGGGTCCGCCAGACTCCAGGCAAGGGGCTGGAGTGGGTGGCAGTTGTCTCCTATGATGGAAACAACAGATACTACGCAGACTCCGTGAAGGGCCGATTCACCATCTCCAGAGACAATTCCAAGAACACGCTGTATCTGCAAATGAACAGCCTGAGACCTGAGGACACGGCTGTCTATTACTGTGCGAGAACCCTAGGTGGTAATTACCAGGGTGCTTTTGATATCTGGGGCCAAGGGACAATGGTCACCGTCTCTTCA	GAAATTGTGTTGACGCAGTCTCCAGGCACCCTGTCTTTGTCTCCAGGGGAAAGAGTCACCCTCTCCTGCCGGGCCAGTCAGAGTGTTGGCAGCATCTACTTAGCCTGGTACCAGCAGAAACCTGGCCAGGCTCCCAGGCTCCTCATCTCTGGTGCATCCAGCAGGGCCACTGGCATCCCAGACAGGTTCAGTGGCAGTGGGTCTGGGGCAGACTTCACTCTCACCATCAGCAGACTGGAGCCTGAAGATTTTGCAGTGTATTACTGTCAGCAGTATGGTAGTTTACCTCCGACGTTCGGCCAAGGGACCAAGGTGGAAATCAAA
423	IML3694	Post-vax	ADI-67483	IGHV1-69*01	IGHD2-15*01	IGHJ5*02	IGKV1-39*01	IGKJ1*01	6.4	3.8	Undefined	No		>1.0	>1.0	>1.0		GCGAGAGACTACAGATATTGTAGTGGTAATAGCTGCTCCTTCTGGTTCGACCCC	ARDYRYCSGNSCSFWFDP	CAACAGAGTTACAGTACCCCTCGGACG	QQSYSTPRT	CAGGTGCAGCTGGTGCAGTCTGGGGCTGAGGTGAAGAAGCCTGGGTCCTCGATGAAGATCTCCTGCAAGGCTTCTGGAGGCGCCTTCAGCATCTATACCATCGCCTGGGTGCGACAGGCCCCTGGACAAGGGCTTGAGTGGATGGGAGGGATCATCCCTATGTCTGGAACACCAAACTACGCACAGAACTTCCAGGGCAGAGTCACGATTACCGCGGACGAATCCACGACCACAGTCTACATGCACCTGAGCAGCCTGAGATCTGAGGACACGGCCGTATATTTCTGTGCGAGAGACTACAGATATTGTAGTGGTAATAGCTGCTCCTTCTGGTTCGACCCCTGGGGCCAGGGAACCCTGGTCACCGTCTCCTCA	GACATCCAGATGACCCAGTCTCCATCCTCCCTGTCTGCATCTGTAGGGGACAGAATCACCATCACTTGCCGGGCAAGTCAGAGCATTAGTAATTATTTAAATTGGTATCAACAAAAACCAGGGAAAGCCCCTAAGGTCCTGATCTACACTGCATCCAGTTTGCAAAGTGGGGTCCCATCAAGGTTCAGTGGCAGTGGATCTGGGACAGATTTCACTCTCACCATCAGCAGTCTGCAACCTGAAGATTTTGCAACTTACTTCTGTCAACAGAGTTACAGTACCCCTCGGACGTTCGGCCAAGGGACCAAGGTGGAAATCAAA
424	IML3694	Post-vax	ADI-67484	IGHV1-69*01	IGHD3-9*01	IGHJ2*01	IGKV1-39*01	IGKJ1*01	4.7	4.9	S2	No						GCGACAGGGGTTCGATATTGTGATACTACGTCCTGCCGTGCGTCGTATTTCGATCTC	ATGVRYCDTTSCRASYFDL	CAACAGAGTATAGTACCCCCCTGGACG	QQSIVPPWT	CAGGTGCAGCTGGTGCAGTCTGGGGCTGAGGTGAAGAAGCCTGGGTCCTCGGTGAAGGTCTCCTGCAAGGCTTCTGGAGGCACCTTCATCAACTCTGCTATCAGCTGGGTGCGACAGGCCCCTGGACAAGGGCTTGAGTGGATGGGAGGACTCGTCGCTATCCTTGGTACACCAAACTACGCACAGAAGTTCCAGGGCAGAGTAACGATTACCGCGGACGAGTCCAGGAGCACAGCCTACATGGAACTGAGCAGCCTGAGATCTGAGGACACGGCCGTGTATTACTGTGCGACAGGGGTTCGATATTGTGATACTACGTCCTGCCGTGCGTCGTATTTCGATCTCTGGGGCCGTGGCACCCTGGTCACTGTCTCCTCA	GACATCCAGATGACCCAGTCTCCTTCCTCCCTGTCTGCATCTGTAGGAGACAGAATCACCATCACTTGCCGGGCAAGTCAGAGCATTGGCAACTATTTAAATTGCTTTCAGCAGAAACCAGGGAAAGCCCCTAAGCTCCTGATCTATGCTGCGTCCAGTTTGCAAAGTGACGTCCCATCAAGGTTCAGTGGCAGTGGATCTGGGTCAGATTTCACTCTCACCATCAGCAGTCTGCAACCTGCAGATTTTGCAACTTATTACTGTCAACAGAGTATAGTACCCCCCTGGACGTTCGGCCAAGGGACCAAGGTGGAAATCAAA
425	IML3694	Post-vax	ADI-67485	IGHV1-69*01	IGHD3-9*01	IGHJ2*01	IGKV3-20*01	IGKJ2*01	4.7	1.7	RBD	No	0.02217	0.0148		0.2704	4.211	GCGACAGGGGTTCGATATTGTGATACTACGTCCTGCCGTGCGTCGTATTTCGATTTC	ATGVRYCDTTSCRASYFDF	CAGCAGTATGGTAGCTCACCTCTGACG	QQYGSSPLT	CAGGTGCAGCTGGTGCAGTCTGGGGCTGAGGTGAAGAAGCCTGGGTCCTCGGTGAAGGTCTCCTGCAAGGCTTCTGGAGGCACCTTCATCAACTCTGCTATCAGCTGGGTGCGACAGGCCCCTGGACAAGGGCTTGAGTGGATGGGAGGACTCGTCGCTATCCTTGGTACACCAAACTACGCACAGAAGTTCCAGGGCAGAGTAACGATTACCGCGGACGAGTCCAGGAGCACAGCCTACATGGAACTGAGCAGCCTGAGATCTGAGGACACGGCCGTGTATTACTGTGCGACAGGGGTTCGATATTGTGATACTACGTCCTGCCGTGCGTCGTATTTCGATTTCTGGGGCCGTGGCACCCTGGTCACTGTCTCCTCA	GAAATTGTGTTGACGCAGTCTCCAGGCACCCTGTCTTTGTCCCCAGGGGAAAGAGCCACCCTCTCCTGCAGGACCAGTCAGAGTGTTAGCAGCAGCCACTTAGCCTGGTACCAGCAGAAACCTGGCCAGGCTCCCAGGCTCGTCATCTATGGTGCATCCAGCAGGGCCACTGGCATCCCAGACAGGTTCAGTGGCAGTGGGTCTGGGACAGACTTCACTCTCACCATCAGCAGACTGGAGCCTGAAGATTTAGCAGTGTATTACTGTCAGCAGTATGGTAGCTCACCTCTGACGTTTGGCCAGGGGACCAAGCTGGAGATCAAA
426	IML3694	Post-vax	ADI-67486	IGHV2-26*01	IGHD3-16*02	IGHJ6*03	IGLV2-18*02	IGLJ1*01	4.3	2.4	S2	No						GCCCGGATACAGGGGGGAAAACACCCCTGGCTGTACTACTACTACTACCACTACATGGACGTC	ARIQGGKHPWLYYYYYHYMDV	AGCTCATATACAACCAGCAGCACTTTAATA	SSYTTSSTLI	CAGGTCACCTTGAAGGAGTCTGGTCCTGTGCTGGTGAAGCCCACAGAGACCCTCACGCTGACCTGCACCGTCTCTGGATTCTCACTCAGCAGTGCTACAATGGGTGTGAGCTGGATCCGTCAGCCCCCAGGGAAGGCCCTGGAGTGGCTTGCACACATTTCTTCGAGTGACGAAAAATCCTATAGTACATCTCTGAAGAGAAGGCTCACCATCTCCAAGGACACCTCCCAGAGCCAGGTGGTCCTTACCATGACCAACATGGACCCTGTGGACACAGCCACATATTATTGTGCCCGGATACAGGGGGGAAAACACCCCTGGCTGTACTACTACTACTACCACTACATGGACGTCTGGGGCAAAGGGACCACGGTCACCGTCTCCTCA	CAGTCTGCCCTGACTCAGCCTCCCTCCGTGTCCGGGTCTCCTGGACAGTCAGTCACCATCTCCTGCACTGGAACCAGCAGTGACGTTGGTGCTTTTAACCGTGTCTCCTGGTACCAGCAGCCCCCAGACACAGCCCCCAAACTCATCATTTATGAGGTCAGTGATCGGCCCTCAGGGGTCCCTGATCGCTTCTCTGGGTCCAAGTCTGGCAACACGGCCTCCCTGACCATCTCTGGGCTCCAGGCTGAGGACGAGGCTGATTATTACTGCAGCTCATATACAACCAGCAGCACTTTAATATTCGGAACTGGGACCAAGGTCACCGTCCTA
427	IML3694	Post-vax	ADI-67487	IGHV3-15*01	IGHD3-10*01	IGHJ5*02	IGLV3-19*01	IGLJ1*01	4.6	2.1	S2	No						GCCACAGATATCTATGGTTCAGGGAGTTATTATAACGTCCCC	ATDIYGSGSYYNVP	AACTCCCGGGACACCACTGGTAACCATCTGGGGATA	NSRDTTGNHLGI	GAGGTGCAGCTGGTGGAGTCTGGGGGAGGCTTGGTGAAGCCTGGGGGGTCCGTTAGACTCTCCTGTGCAGCCTCTGGATTCACTTTCACTCACGCCTGGATGAGCTGGGTCCGCCAGGCTCCAGGGAAGGGGCTGGAGTGGGTTGGCCGTATTAGAAGCAAAGCTGATGGTGGGACAGCAGACTACGCTGCACCCGTGAAAGGCAGATTTACCATCTCAAGAGATGACTCAAAGAACACGCTGTATTTGCAAATGAATAGCCTGAAAACCGAGGACACAGCCGTATATTACTGTGCCACAGATATCTATGGTTCAGGGAGTTATTATAACGTCCCCTGGGGCCAGGGCACCCTGGTCACCGTCTCCTCA	TCTTCTGAGCTGACTCAGGACCCTGCTGTGTCTGTGGCCTTGGGACAGACAGTCAGGATCACATGCCAAGGAGACAGCCTCAGAATCTATTATGCAAGCTGGTACCAGCAGAAGCCAGGACAGGCCCCTGTCCTTGTCATCTATAATAAAAACAACCGGCCCTCAGGGATCCCAGACCGATTCTCTGGCTCCAGCTCAGGAAACACAGCTTCCTTGACCATCACTGGGGCTCAGGCGGAAGATGAGGCTGACTATTACTGTAACTCCCGGGACACCACTGGTAACCATCTGGGGATATTCGGAACTGGGACCAAGGTCACCGTCCTA
428	IML3694	Post-vax	ADI-67488	IGHV4-31*03	IGHD3-9*01	IGHJ3*02	IGKV3-11*01	IGKJ5*01	4.4	1.7	Undefined	No						GCGAGAGTTGATAATTTTGACTGGTTATCCGTC	ARVDNFDWLSV	CAGCAGCGTTACAACTGGCCTCCGATCACC	QQRYNWPPIT	CAGGTGCAGCTGCAGGAGTCGGGCCCAGGACTGGTGAAGCCTTCACAGACCCTGTCCCTCACCTGCGCTGTCTCTGGTGGCTCCATCAGCAGTAGTGGTTATTACTGGAGCTGGATCCGCCAGCACCCAGGGAAGGGCCTGGAGTGGATTGGGTTCATCTATTACAGTGGGACTTCCTACTACAACCCGTCCCTCAAGAGTCGAGTCACCATATCAATGGACACGTCTAAGAACCACTTCTCCCTGAAGCTGAGCTCTGTGACTGCCGCGGACACGGCCATGTATTTCTGTGCGAGAGTTGATAATTTTGACTGGTTATCCGTCTGGGGCCAAGGGACAATGGTCACCGTCTCTTCA	GAAATTGTGTTGACACAGTCTCCAGCCACCCTGTCTTTGTCTCCAGGGGAAAGAGCCACCCTCTCCTGCAGGGCCAGTCAGAGTGTTAGCACCTACTTAGCCTGGTACCAACAGAAACCTGGCCAGGCTCCCAGGCTCCTCATCTATGATTCATCCTACAGGGCCACTGGCATCCCAGCCAGGTTCAGTGGCAGTGGGTCTGGGACAGACTTCACTCTCACCATCAGCAGCCTAGAGCCTGAAGATTTTGCAGTTTATTACTGTCAGCAGCGTTACAACTGGCCTCCGATCACCTTCGGCCAAGGGACACGACTGGAGATTAAA
429	IML3694	Post-vax	ADI-67489	IGHV1-69*01	IGHD3-22*01	IGHJ4*02	IGKV3-11*01	IGKJ3*01	5.1	1.4	S2	No						GCGAGAGAGGACGCCTATGATAGTAGGGGTTCTTTCGATGAGTAT	AREDAYDSRGSFDEY	CAGTACCGTAGCAACTGGCCTCCTATATTCACT	QYRSNWPPIFT	CAGGTGCAGCTGGTGCAGTCTGGGGCTGAGGTGAAGAAGCCTGGGTCCTCGGTGAAGGTCTCCTGCAAGGCTTCTGGAGGCACCTTCAGTACACATGCTATTACCTGGGTGGGACAGGCCCCTGGACAAGGACTTGAGTGGATGGGAGGGATCATCCCTATGTTTGGTACAGCAAAGTACGCACAGAGGTTCCAGGGCAGAGTCACGATTACCGCGGACGAATCCACGAGCACAGTCTACATGGAACTGAGCAGCCTGAGATATGAGGACACGGCCGTTTATTACTGTGCGAGAGAGGACGCCTATGATAGTAGGGGTTCTTTCGATGAGTATTGGGGCCAAGGAACCCTGGTCACCGTCTCCTCA	GAAATTGTGTTGACACAGTCTCCAGCCACCCTGTCTTTGTCTCCAGGGGAAAGAGCCACCCTCTCCTGCAGGGCCAGTCAGAGTGTTAGCAACTTCTTAGCCTGGTACCAACAGAAACCTGGCCAGGCTCCCAGGCTCCTCATCTATGATGCATCCAACAGGGCCACTGGCATCCCAGCCAGGTTCAGTGGCAGTGGGTCTGGGACAGACTTCACTCTCACCATCAGCAGCCTAGAGCCTGAAGATTTTGCAGTTTATTACTGTCAGTACCGTAGCAACTGGCCTCCTATATTCACTTTCGGCCCTGGGACCAAAGTGGATATCAAA
430	IML3694	Post-vax	ADI-67490	IGHV4-4*02	IGHD4-17*01	IGHJ4*02	IGKV3-20*01	IGKJ5*01	4.1	3.1	S2	Yes						GCGACTCATTTCCGAGACTACGGTGGTGGCTCCGGGGTAGACTAC	ATHFRDYGGGSGVDY	CAGCAATATAGTAGCTCATTTCCGGTCACC	QQYSSSFPVT	CAGGTGCAGCTGCAGGAGTCGGGCCCAGGACTGGTGAAGCCTTCGGGGACCCTGTCCCTCAACTGCGCTGTCTCTGGTGGCTCCATCAGCAGTAGAAACTGGTGGAGTTGGGTCCGCCAGCCCCCAGGGAAGGGACTGGAGTGGATTGGGGAAATGTATCATAGTGGAAACACCAATTACAACCCGTCCCTCAAGAGTCGAGTCACCATATCAATGGACAAGTCCAAGAACCAGATCTCCCTGAAGCTGACGTCTGTGACCGCCGCGGACACGGCCGTGTATTACTGTGCGACTCATTTCCGAGACTACGGTGGTGGCTCCGGGGTAGACTACTGGGGCCAAGGAACCCTGGTCACCGTCTCCTCA	GAAATTGTGTTGACGCAGTCTCCAGGCACCCTGTCTTTGTCTCCAGGAGAAAGAGCCACCCTCTCCTGCAGGGCCAGTCAGAGTGTTAGCAGCAGCTACTTAGGCTGGTACCAGCAGAAACCTGGCCAGGCTCCCAGGCTCCTCATCTATGGTACATCCAGCAGGGCCACCGGCATCCCAGACAGGTTCAGTGGCAGTGGGTCTGGGACAGACTTCACTCTCACCATCAGCAGACTGGAGCCTGAAGATTTTGCAGTGTATTATTGTCAGCAATATAGTAGCTCATTTCCGGTCACCTTCGGCCAAGGGACACGACTGGAGATTAAA
431	IML3694	Post-vax	ADI-67491	IGHV1-69*01	IGHD2-2*01	IGHJ4*02	IGKV3-11*01	IGKJ3*01	5.5	1.1	S2	No						GCGAGTGTCTCCCGTGTAGTAGATCCCGGGGGCGACTAC	ASVSRVVDPGGDY	CACCAGCGTAGCAACTGGCCGGGGTTCACT	HQRSNWPGFT	CAGGTGCAGCTGGTGCAGTCTGGGGCTGAGGTGAAGAAGCCTGGGTCCTCGGTGAAGGTCTCCTGCAAGGTTTCTGGAGGCACCTTCAGCAGCTATGCTATCAGCTGGGTGCGACAGGCCCCTGGACAAGGGCTTGAGTGGATGGGAACAATCATCCCTATCTTTAGTAACACAGACTACGCACAGAAATTCCAGGACAGAGTCACGATTACCGCGGACGAATCCACCAGCACAGCCTACGTGGAGCTGAGCAGCCTGAGATCTGAGGACACGGCCTTTTATTTCTGTGCGAGTGTCTCCCGTGTAGTAGATCCCGGGGGCGACTACTGGGGCCAAGGAACCCTGGTCACCGTCTCCTCA	GAAATTGTGTTGACACAGTCTCCAGCCACCCTGTCTTTGTCTCCAGGGGAAAGAGCCACCCTCTCCTGCAGGGCCAGTCAGAGTGTTAGGAGCTACTTAGCCTGGTACCAACAGAAACCTGGCCAGGCTCCCAGGCTCCTCATCTATGATGCATCCAACAGGGCCACAGGCATCCCAGCCAGGTTCAGTGGCAGTGGGTCTGGGACAGACTTCACTCTCACCATCAGCAGCCTAGAGCCTGAAGATTTTGCAGTTTATTACTGTCACCAGCGTAGCAACTGGCCGGGGTTCACTTTCGGCCCTGGGACCAAAGTGGATATCAAA
432	IML3694	Post-vax	ADI-67492	IGHV3-33*01	IGHD3-3*01	IGHJ4*02	IGLV3-10*01	IGLJ3*02	2.7	3.1	S2	No						GCGAGAGATTTTCAGATTGGAGAAGTGGATCACGACTTACACTAC	ARDFQIGEVDHDLHY	TACTCAACAGACAGCAGTGGTAATCATTGGGTG	YSTDSSGNHWV	CAGGTGCAGCTGGTGGAGTCTGGGGGAGGCGTGGTCCAGCCTGGGAGGTCCCTGAGATTCTCCTGTGCAGCGTCTGGTTTCACCTTCAATAATTATGGCATGCACTGGGTCCGCCAGACTCCAGGCAAGGGGCTGGAGTGGGTGGCAGTTATATGGTATGATGGAAGTAATAAATACTATGCAGACTCCGTGAAGGGCCGATTCACCATCTCCAGAGACAATTCCAACAACACGCTGTATCTGCAAATGAACAGCCTGAGACCCGAGGACACGGCTGTGTATTACTGTGCGAGAGATTTTCAGATTGGAGAAGTGGATCACGACTTACACTACTGGGGCCAAGGAACCCTGGTCACCGTCTCCTCA	TCCTATGAGCTGACACAGCCACCCTCGGTGTCAGTGTCCCCAGGACAAACGGCCAGGATCACCTGCTCTGGAGACGCATTGCCAACAAGATATGCTTATTGGTACCAACAGAAGTCAGGCCAGGCCCCTGTCCTGGTCATCTATGAGGACAGCAAACGACCCTCCGGGATCCCTAAGAGATTCTCTGGCTCCACCTCAGGGACAGTGGCCACCTTGACAATCAGTGGGGCCCAGGTGGAGGATGAAGCTGACTACTACTGTTACTCAACAGACAGCAGTGGTAATCATTGGGTGTTCGGCGGAGGGACCAAGCTGACCGTCCTA
[truncated: 26 more rows]
