# Supplementary material for: Vaccination of SARS-CoV-2-infected individuals expands a broad range of clonally diverse affinity-matured B cell lineages
Source: Research Square preprint supplement (doi:10.21203/rs.3.rs-2231608/v1), 2022-11-11
Supplement: Supplementary file 1 [file 473ad7b1f0fa52d446cdb1f9.pdf]

A

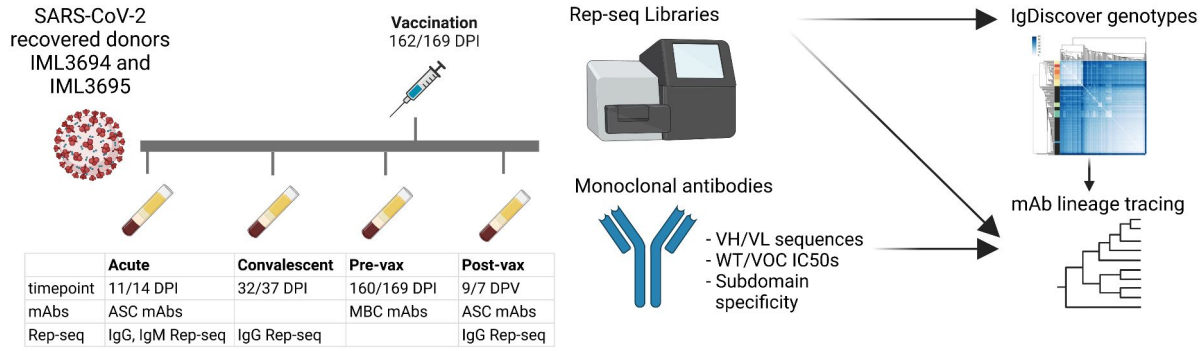

B

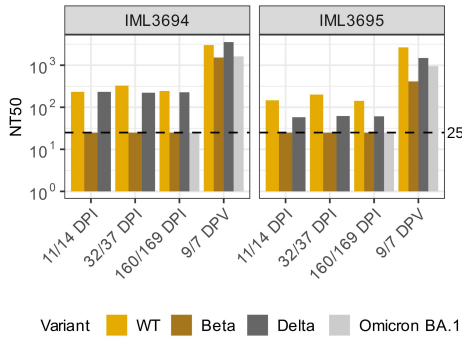

D

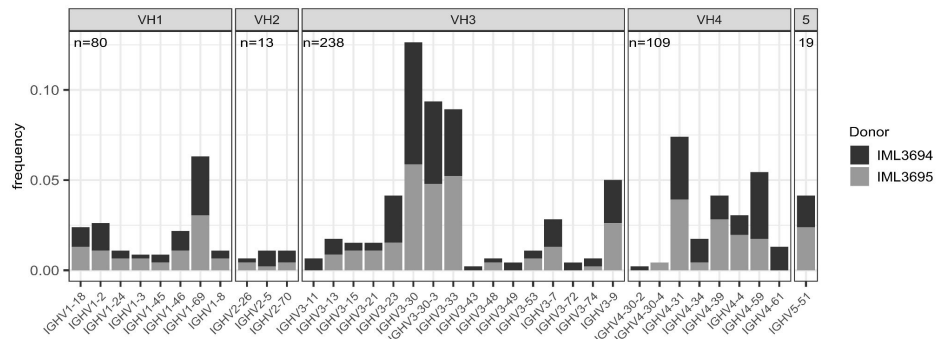

C

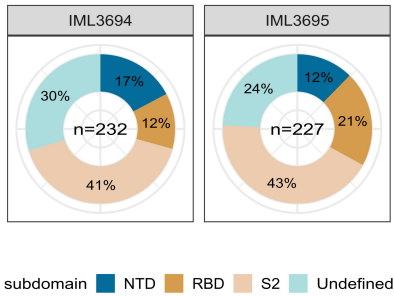

E

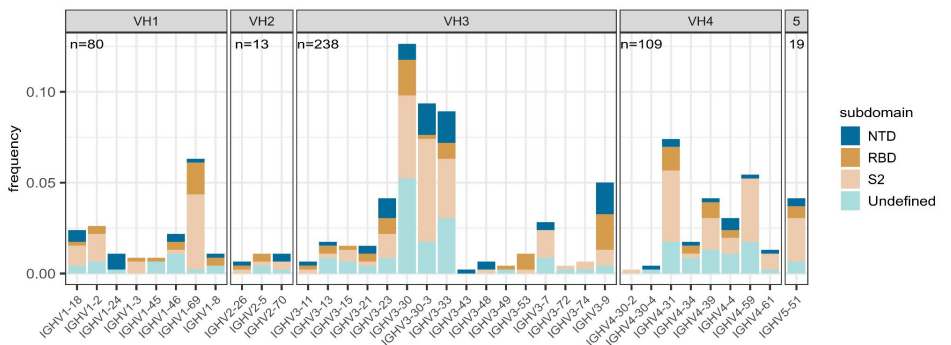

**FIG. 1 |** Study design, serum neutralizing activity and properties of spike-binding monoclonal antibodies (mAbs). **(A)** Schematic of study design with time points for infection and vaccination, mAb isolation, and samples for NGS. **(B)** IML3694 and IML3695's serum neutralizing antibody values against ancestral SARS-CoV-2 Wuhan (WT) and variants of concern (VOCs). **(C)** Pie chart of mAb subdomain specificities in the two donors. **(D)** mAb IGHV allele frequencies colored by donor. **(E)** mAb IGHV allele frequencies colored by subdomain specificity.

| Donor   | mAb ID    | VH gene     | JH gene  | HCDR3                     | % VH SHM nt | VL gene      | JL gene  | LCDR3        | % VL SHM nt | WT IC50 (µg/ml) | Beta IC50 (µg/ml) | Delta IC50 (µg/ml) | Omicron BA.1 IC50 (µg/ml) | Omicron BA.2.75 IC50 (µg/ml) | Omicron BA.5 IC50 (µg/ml) |
|---------|-----------|-------------|----------|---------------------------|-------------|--------------|----------|--------------|-------------|-----------------|-------------------|--------------------|---------------------------|------------------------------|---------------------------|
| IML3694 | ADI-67481 | IGHV3-53*02 | IGHJ4*02 | ARDLDVMGGFDY              | 2           | IGKV1-9*01   | IGKJ1*01 | QELNSYPRT    | 2.1         | 0.0589          | >1                | 0.1227             | N.D.                      | N.D.                         | N.D.                      |
| IML3694 | ADI-67485 | IGHV1-69*01 | IGHJ2*01 | ATGVRYCDDTSCRASDF         | 4.7         | IGKV3-20*01  | IGKJ2*01 | QQYGSSPLT    | 1.7         | 0.0148          | N.D.              | 0.2704             | 4.211                     | N.D.                         | N.D.                      |
| IML3694 | ADI-67649 | IGHV4-4*02  | IGHJ4*02 | ARDIRQDDCSTTRCPEY         | 5.1         | IGKV3-11*01  | IGKJ3*01 | QQRSNWPPT    | 1.7         | 0.012           | >1                | 0.0302             | N.D.                      | N.D.                         | N.D.                      |
| IML3694 | ADI-67652 | IGHV1-2*02  | IGHJ6*03 | ARDRNWAIFGVESDV           | 5.7         | IGLV2-23*02  | IGLJ3*02 | CSYADSSAWV   | 4.1         | 0.1698          | >1                | 0.302              | N.D.                      | N.D.                         | N.D.                      |
| IML3694 | ADI-67657 | IGHV3-23*01 | IGHJ4*02 | AKDRLRTSSLQPMPPFDY        | 3.7         | IGKV4-1*01   | IGKJ1*01 | QQYYSAPYT    | 1.7         | 0.0007          | N.D.              | >1                 | 2.139                     | N.D.                         | N.D.                      |
| IML3694 | ADI-67679 | IGHV3-53*02 | IGHJ4*02 | ARDLAGPGLFDH              | 5.8         | IGKV1-33*01  | IGKJ5*01 | QQYDNVPSIT   | 3.2         | 0.0584          | >1                | 0.0599             | 0.1204                    | N.D.                         | N.D.                      |
| IML3694 | ADI-67680 | IGHV3-33*01 | IGHJ2*01 | ARDGTIAVAGTFDRFFDL        | 3.4         | IGKV1-33*01  | IGKJ3*01 | QQYHILFFT    | 3.9         | 0.1108          | >1                | 0.2379             | N.D.                      | N.D.                         | N.D.                      |
| IML3694 | ADI-67722 | IGHV4-34*01 | IGHJ6*03 | ARGVQIPEYCSMNCPVSDHHYFMDV | 13.3        | IGKV3-20*01  | IGKJ1*01 | QQYGGSRPWT   | 4.5         | 0.0282          | 0.2552            | 0.0122             | N.D.                      | N.D.                         | N.D.                      |
| IML3694 | ADI-67726 | IGHV1-8*01  | IGHJ6*03 | ATKRVRQVPRYYYYMDL         | 3.1         | IGKV2-28*01  | IGKJ4*01 | MQSLQTPLT    | 2           | 0.0258          | N.D.              | 0.0235             | N.D.                      | N.D.                         | N.D.                      |
| IML3694 | ADI-67744 | IGHV3-9*01  | IGHJ6*02 | AKGKAAGHSYYYGMDV          | 3.4         | IGKV1-39*01  | IGKJ1*01 | QQSYVTPWT    | 3.9         | 0.0154          | 0.0272            | 0.0102             | 0.01366                   | 0.007                        | >1                        |
| IML3694 | ADI-67748 | IGHV4-31*03 | IGHJ4*02 | ARSPVIYGTNSGFDY           | 5.7         | IGKV5-2*01   | IGKJ1*01 | LQHDNFPYT    | 1.1         | 0.0082          | 0.0322            | 0.0431             | 4.405                     | N.D.                         | N.D.                      |
| IML3694 | ADI-67757 | IGHV1-8*01  | IGHJ6*02 | ARGNYFDGDDGYVDY           | 4.1         | IGKV3-15*01  | IGKJ4*01 | QQYNNWPLT    | 3.2         | 0.0216          | N.D.              | 0.0302             | N.D.                      | N.D.                         | N.D.                      |
| IML3694 | ADI-67831 | IGHV3-49*03 | IGHJ4*02 | TLTVNTRYFHS               | 2.4         | IGKV3-15*01  | IGKJ2*03 | QQYNNWFS     | 0.7         | 0.009           | >1                | 0.8322             | N.D.                      | N.D.                         | N.D.                      |
| IML3695 | ADI-67119 | IGHV3-53*02 | IGHJ6*02 | ARDSVRGGMDV               | 5.8         | IGLV3-9*01   | IGLJ2*01 | QVWDDTTSVI   | 8.6         | 0.065           | 0.6351            | 0.0808             | N.D.                      | N.D.                         | N.D.                      |
| IML3695 | ADI-67127 | IGHV3-9*01  | IGHJ3*02 | AKDDYPSSWYEHHPQWAFDI      | 3.7         | IGLV1-51*01  | IGLJ3*02 | GTWDSLSV     | 0.3         | 0.0541          | >1                | >1                 | N.D.                      | N.D.                         | N.D.                      |
| IML3695 | ADI-67135 | IGHV3-9*01  | IGHJ4*02 | AKGGEYSSRWYLRESYFDY       | 5.1         | IGKV2D-29*01 | IGKJ4*01 | MQSIQVPLT    | 1.7         | 0.0025          | N.D.              | >1                 | N.D.                      | N.D.                         | N.D.                      |
| IML3695 | ADI-67138 | IGHV4-39*01 | IGHJ4*02 | AVGGVRSLEWLLQFDY          | 6.1         | IGLV2-8*01   | IGLJ1*01 | SSYAGSSSLV   | 2.7         | 0.0065          | 0.001             | 0.003              | 0.002276                  | 0.003                        | >1                        |
| IML3695 | ADI-67139 | IGHV4-31*03 | IGHJ4*02 | ARDSDYGEYFDS              | 3.3         | IGKV3-11*01  | IGKJ5*01 | QQRYNWPPT    | 1.7         | 0.2125          | >1                | >1                 | N.D.                      | N.D.                         | N.D.                      |
| IML3695 | ADI-67140 | IGHV3-53*02 | IGHJ3*02 | AREAYAFDI                 | 5.5         | IGKV1-9*01   | IGKJ4*01 | QQLNSHPPA    | 2.1         | 0.012           | >1                | 0.015              | N.D.                      | N.D.                         | N.D.                      |
| IML3695 | ADI-67183 | IGHV4-39*01 | IGHJ4*02 | AVGGVRFLEWLLQFDY          | 3.7         | IGLV2-8*01   | IGLJ2*01 | SSYAGSSSLI   | 3.7         | 0.0029          | 0.0027            | 0.0008             | 0.003034                  | 0.006                        | >1                        |
| IML3695 | ADI-67189 | IGHV3-30*03 | IGHJ4*02 | ARDYGDYAAFD               | 4.4         | IGKV4-1*01   | IGKJ4*01 | QQYYSTPLT    | 1.3         | 0.2776          | >1                | >1                 | N.D.                      | N.D.                         | N.D.                      |
| IML3695 | ADI-67218 | IGHV4-34*01 | IGHJ3*02 | ARWDLLYPRDAFDI            | 3.1         | IGLV2-11*01  | IGLJ2*01 | CSYAGSYVV    | 2.1         | 0.0657          | >1                | 0.057              | N.D.                      | N.D.                         | N.D.                      |
| IML3695 | ADI-67852 | IGHV3-9*01  | IGHJ4*02 | AKDIQFRDRDCTNGVCSVGGFY    | 5.7         | IGKV3-15*01  | IGKJ2*01 | QQYKNWPPRT   | 1.7         | 0.2345          | >1                | >1                 | 1.103                     | N.D.                         | N.D.                      |
| IML3695 | ADI-67857 | IGHV4-39*01 | IGHJ4*02 | AVGGVRFLEWLLQFDY          | 2.4         | IGLV2-8*01   | IGLJ1*01 | SSYAGSSNLV   | 1.7         | 0.0027          | 0.0727            | 0.0159             | 0.01917                   | 0.089                        | >1                        |
| IML3695 | ADI-67935 | IGHV4-31*03 | IGHJ4*02 | ARGPYASGSFDS              | 5           | IGKV3-20*01  | IGKJ1*01 | HHYGSSGDT    | 2.1         | 0.048           | N.D.              | 0.039              | N.D.                      | N.D.                         | N.D.                      |
| IML3695 | ADI-67971 | IGHV3-9*01  | IGHJ3*02 | AKLGGAN.D.YDFRSGPTAFDI    | 4.4         | IGLV1-44*01  | IGLJ2*01 | ATWDDSLNGVVV | 2           | 0.1363          | 0.3985            | >1                 | 0.1333                    | N.D.                         | N.D.                      |
| IML3695 | ADI-67977 | IGHV3-9*01  | IGHJ6*02 | VKDMSVGDRSVEYYGMDV        | 2           | IGLV3-21*04  | IGLJ2*01 | QVWDSSSENVV  | 2.1         | 0.0759          | 0.2904            | 0.4427             | 0.02833                   | N.D.                         | N.D.                      |
| IML3695 | ADI-67981 | IGHV1-69*01 | IGHJ3*02 | ARDGRHNYDSTGYHHN.D.FDI    | 5.7         | IGKV1-39*01  | IGKJ1*01 | QQSYSSRT     | 3.2         | 0.0094          | >1                | 0.0117             | 0.04438                   | N.D.                         | N.D.                      |
| IML3695 | ADI-67983 | IGHV3-9*01  | IGHJ4*02 | AKGKWPSPSFLTDY            | 5           | IGKV1-27*01  | IGKJ4*01 | QKYNVPLT     | 3.5         | 0.0031          | >1                | 0.0049             | N.D.                      | N.D.                         | N.D.                      |
| IML3695 | ADI-67994 | IGHV3-23*01 | IGHJ6*02 | ARDLGGYSYGLNFFYAMDV       | 3.8         | IGLV2-14*03  | IGLJ2*01 | SSYTSSTFVL   | 2           | 0.1967          | 0.3379            | 0.227              | 0.3084                    | N.D.                         | N.D.                      |
| IML3695 | ADI-67999 | IGHV1-69*01 | IGHJ4*02 | ARERGYSYGASLYFDY          | 5.1         | IGLV1-40*01  | IGLJ1*01 | QSYDSSLSGAV  | 1.7         | 0.5019          | 0.6414            | >1                 | 0.1381                    | N.D.                         | N.D.                      |

**FIG. 2 |** A summary of all neutralizing mAbs with an IC<sub>50</sub> below 0.4 mg/ml against any of the SARS-CoV-2 VOCs.

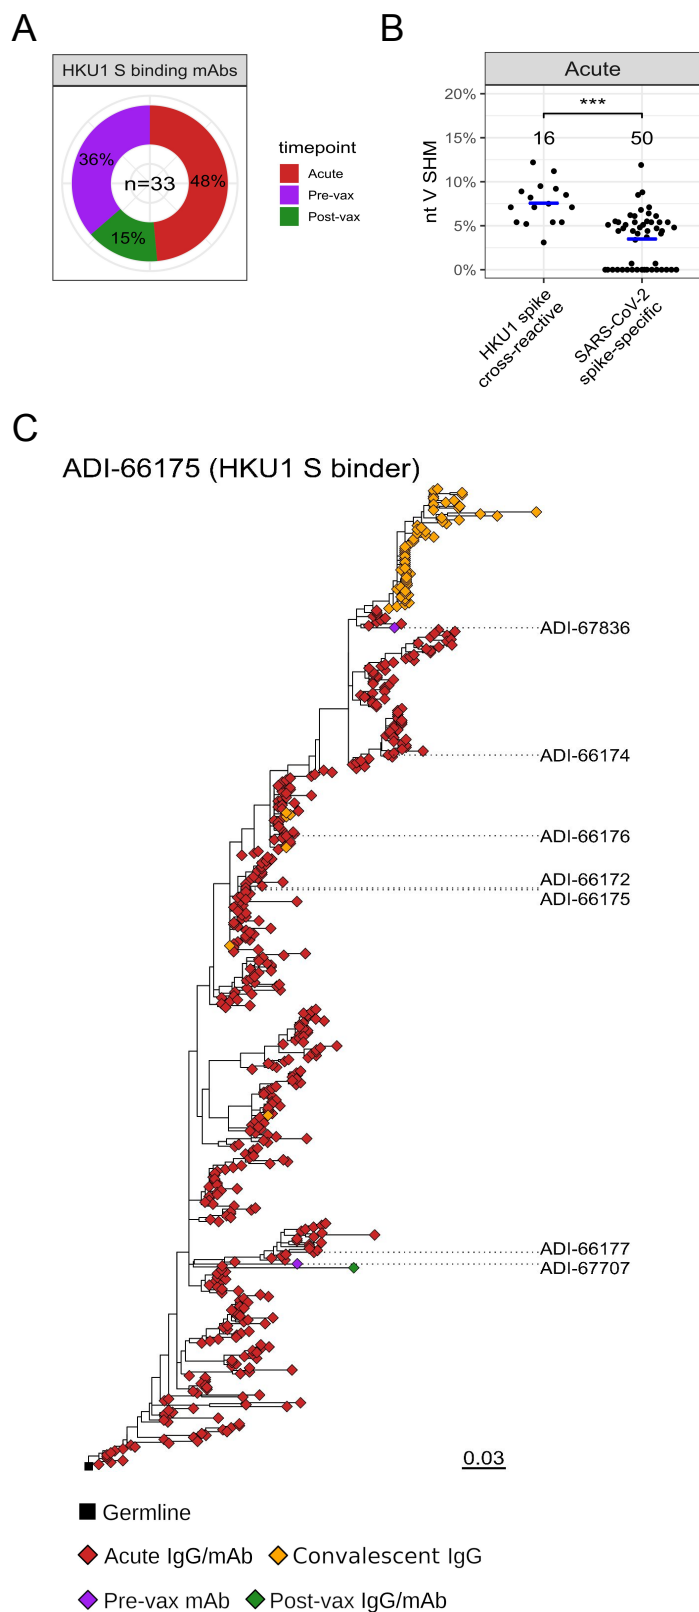

**FIG. 3 |** Isolation time point and evolution of HCoV-HKU1 S cross-reactive mAbs. **(A)** Pie chart of timepoints in which HCoV-HKU1 S-binding mAbs were isolated. **(B)** Dot plot of % nucleotide IGHV SHM for the HCoV-HKU1 S cross-reactive and SARS-CoV-2 S-specific mAbs isolated at the acute timepoint. Mann-Whitney U test used for comparison. **(C)** Maximum likelihood phylogenetic trees of HCoV-HKU1 S-binding traced lineage ADI-66175. The germline sequence was obtained from the IgBLAST generated “germline\_alignment” column of the sequence with the minimum IGHV SHM in the lineage.

A

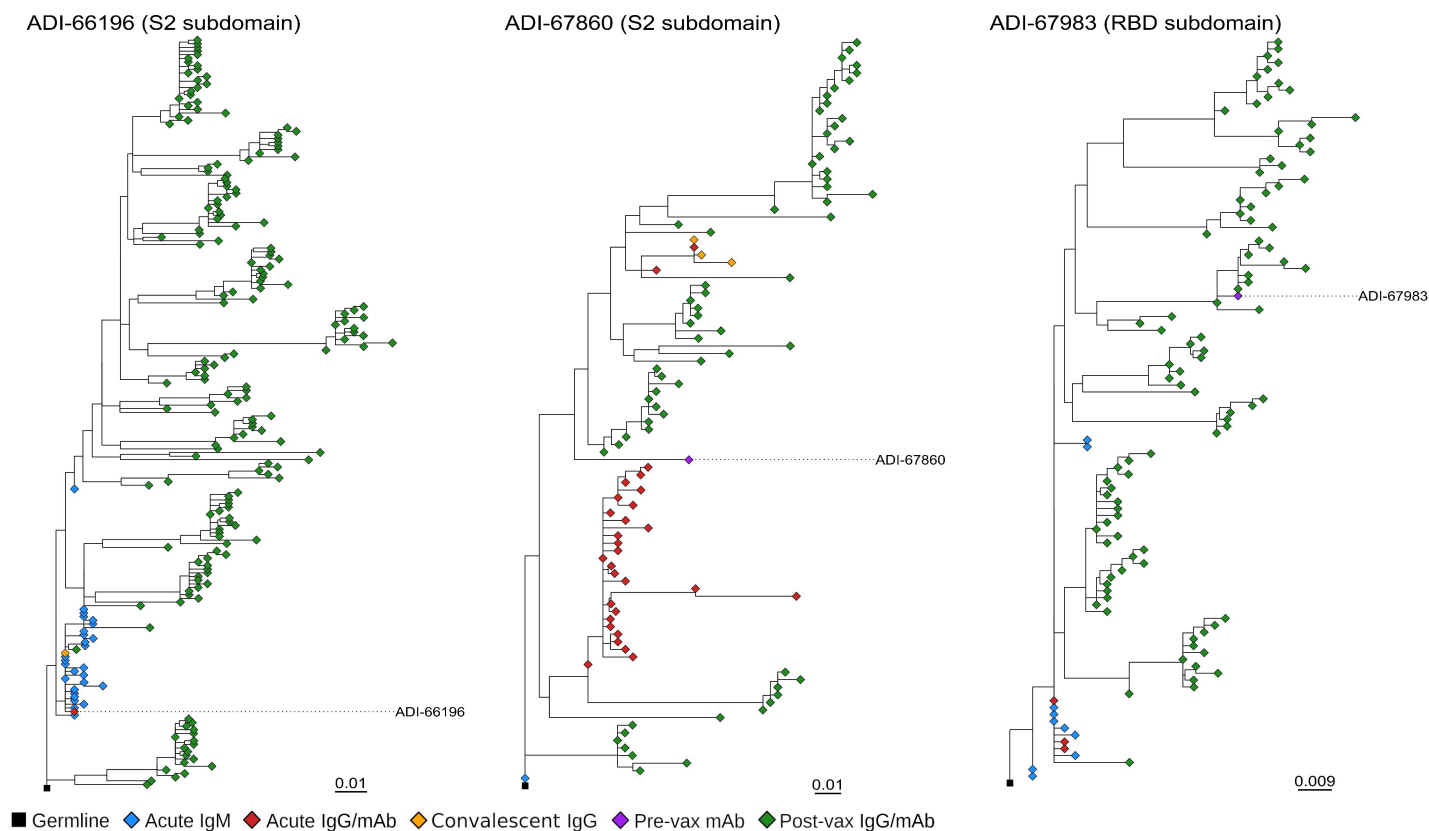

B

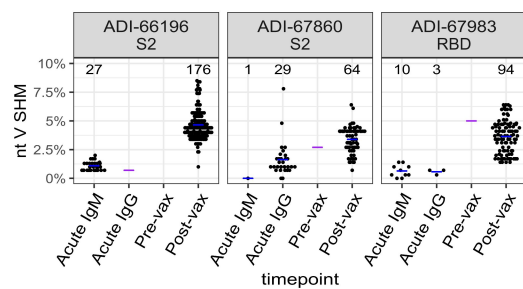

**FIG. 4 |** Evolution of SARS-CoV-2 S-specific antibody lineages over the sampling time points. **(A)** Maximum likelihood phylogenetic trees of traced lineages containing IgM Rep-seq sequences: ADI-66196, ADI-67860, and ADI-67983. Germlines sequences were obtained from the IgBLAST generated “germline\_alignment” column of the sequence with the smallest IGHV SHM in the lineage. **(B)** Dot plot of % nucleotide IGHV SHM for the ADI-66196, ADI-67860, and ADI-67983 lineage sequences. Purple crossbars represent mAb values, while the blue crossbars represent average values of traced variants for each timepoint.

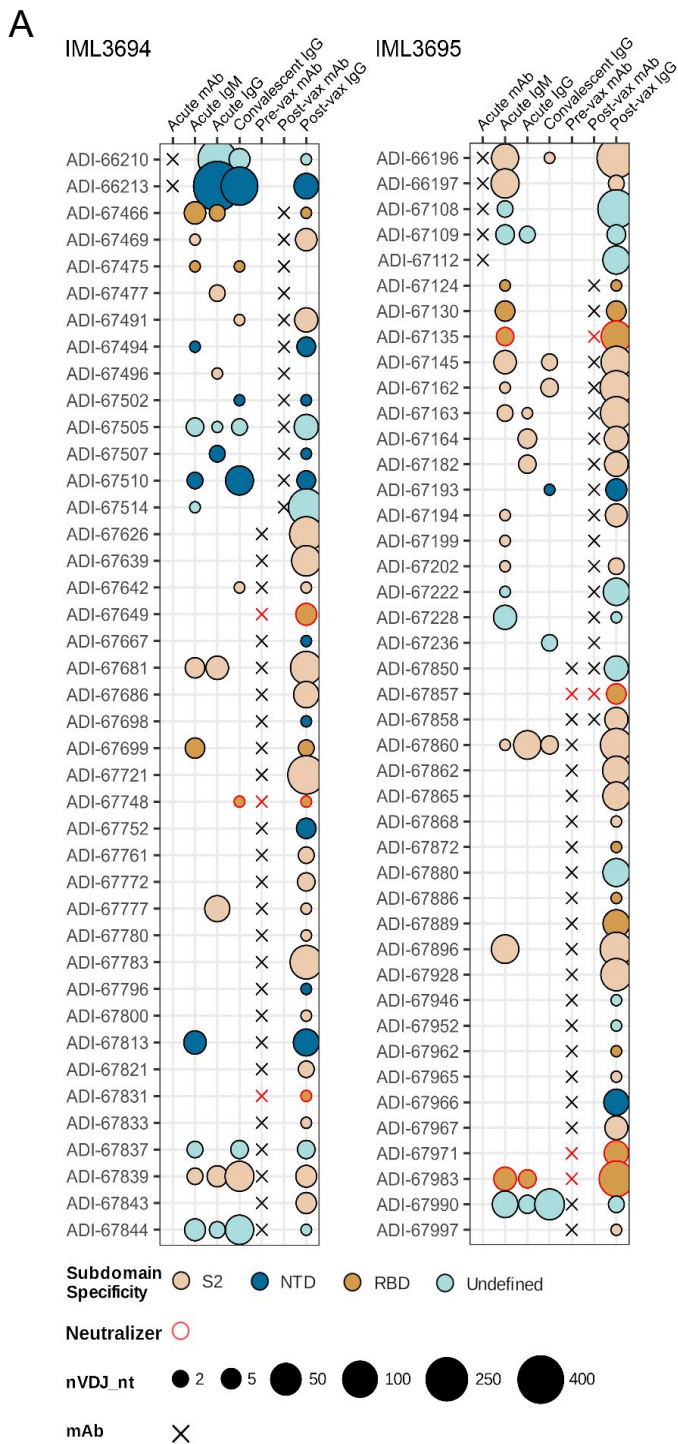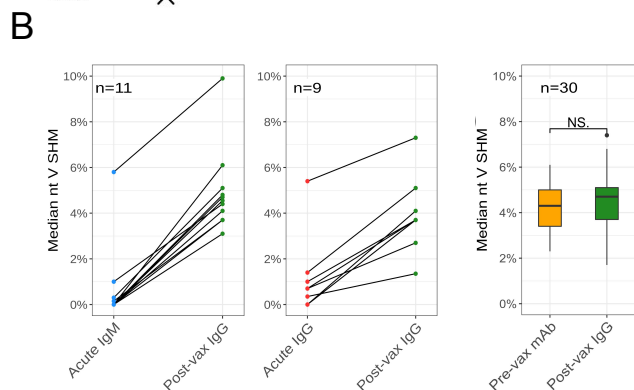

**FIG. 5 |** IgM and IgG repertoire sequencing and lineage tracing of SARS-CoV-2 S-specific antibody lineages at the longitudinal time points. **(A)** Bubble plots of SARS-CoV-2 S-specific mAb lineages found before and after vaccination in IML3694 and IML3695. The bubble sizes correspond to post-FAD and chimera cleaned data. **(B)** Line plots of median % nucleotide IGHV SHM for lineages found in acute IgM/IgG and post-vax IgG Rep-seq data. **(C)** Boxplot of median % nucleotide IGHV SHM for lineages containing pre-vax timepoint mAbs and post-vax IgG Rep-seq. Wilcoxon signed-rank test used for comparison.



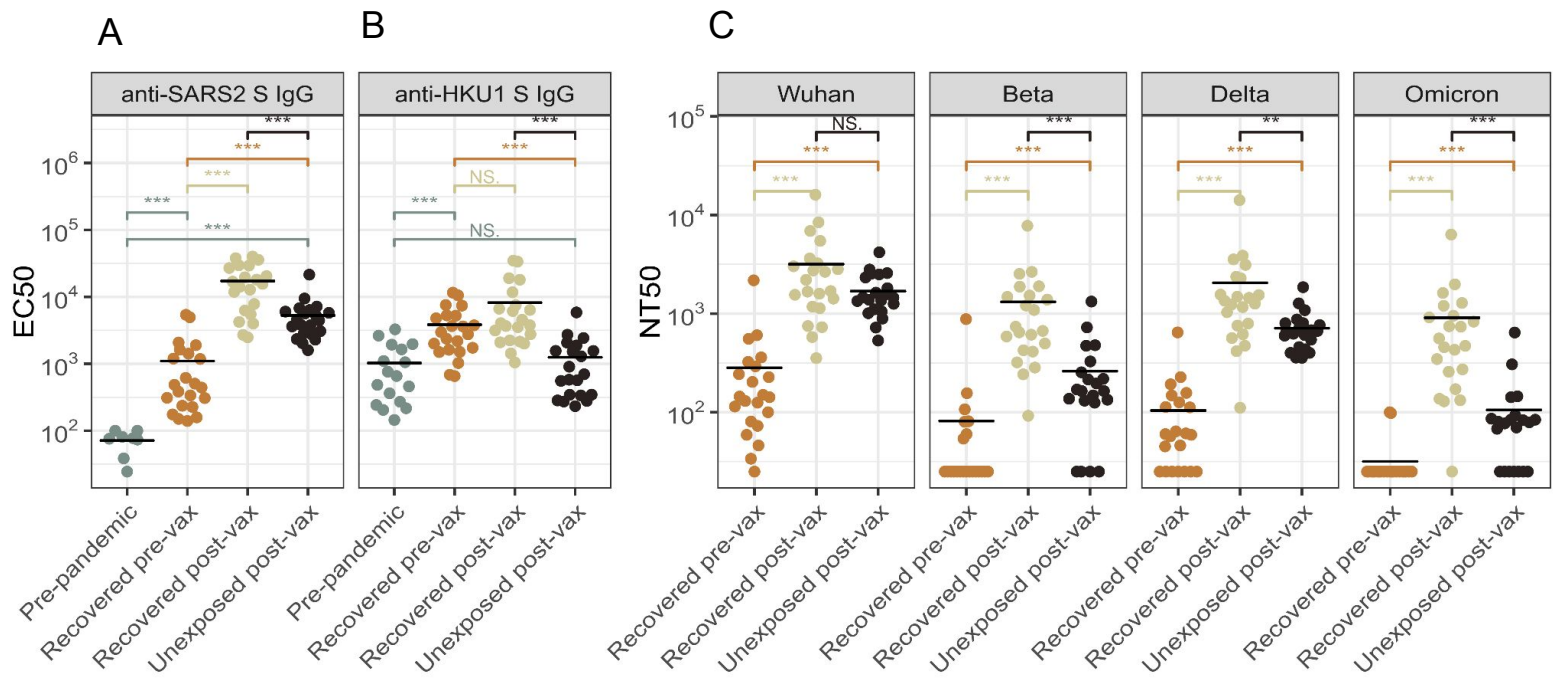

**Supplementary Fig. 1** | Serum IgG titers against the SARS-CoV-2 (**A**) and HCoV-HKU1 S glycoproteins (**B**) as well as neutralizing antibody titers against SARS-CoV-2 WT and variants (**C**) in a cohort of individuals a median of 8 days (range: 7-14) days after vaccination by mRNA-1273 (n = 22) or BNT162b2 (n = 21), 22 of whom were previously infected with SARS-CoV-2 (Recovered) and given one dose and 21 who were not previously infected (Unexposed) and given two doses. The previously infected individuals were vaccinated a median of 179 days after disease onset (range: 40-213 days). For these individuals, we also included serum samples collected a median of 42 (range 0-176 days) days before the mRNA vaccination. We used Mann-Whitney U-tests to compare titers. \*P < 0.05, \*\*P < 0.01, \*\*\*P < 0.001, and \*\*\*\*P < 0.0001.

A

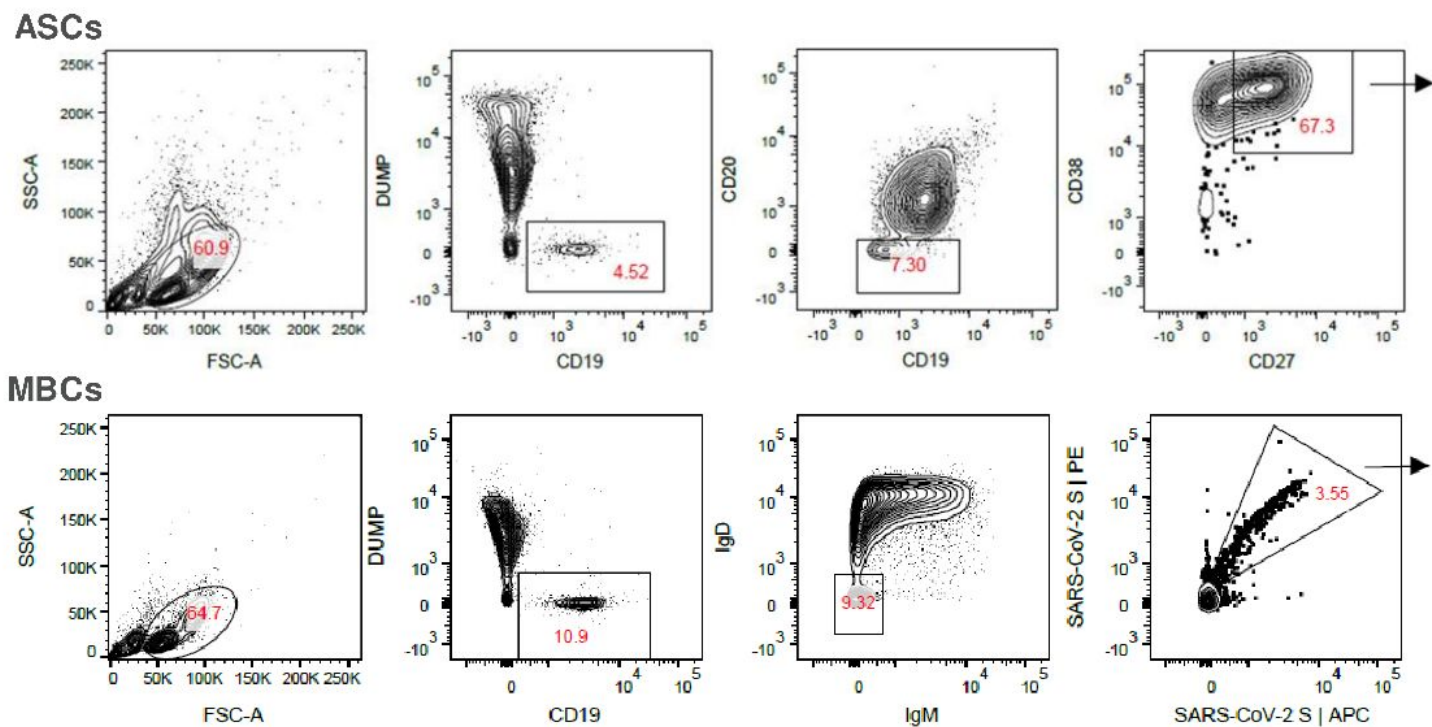

B

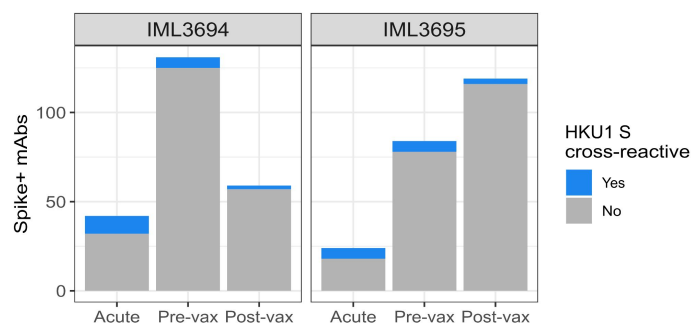

**Supplementary Fig. 2 | (A)** Flow cytometry plots showing the staining and gating strategy for sorting ASCs and spike-specific MBCs. **(B)** Number of HCoV-HKU1 and SARS-CoV-2 S cross-reactive mAbs versus SARS-CoV-2 S-specific mAbs isolated at the different time points.

A

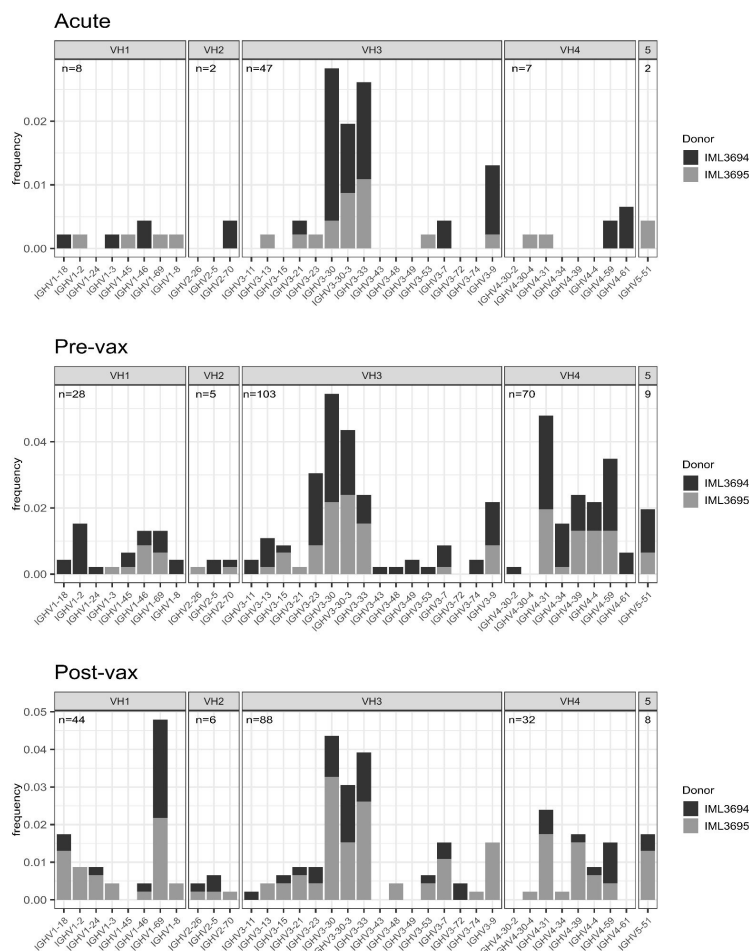

B

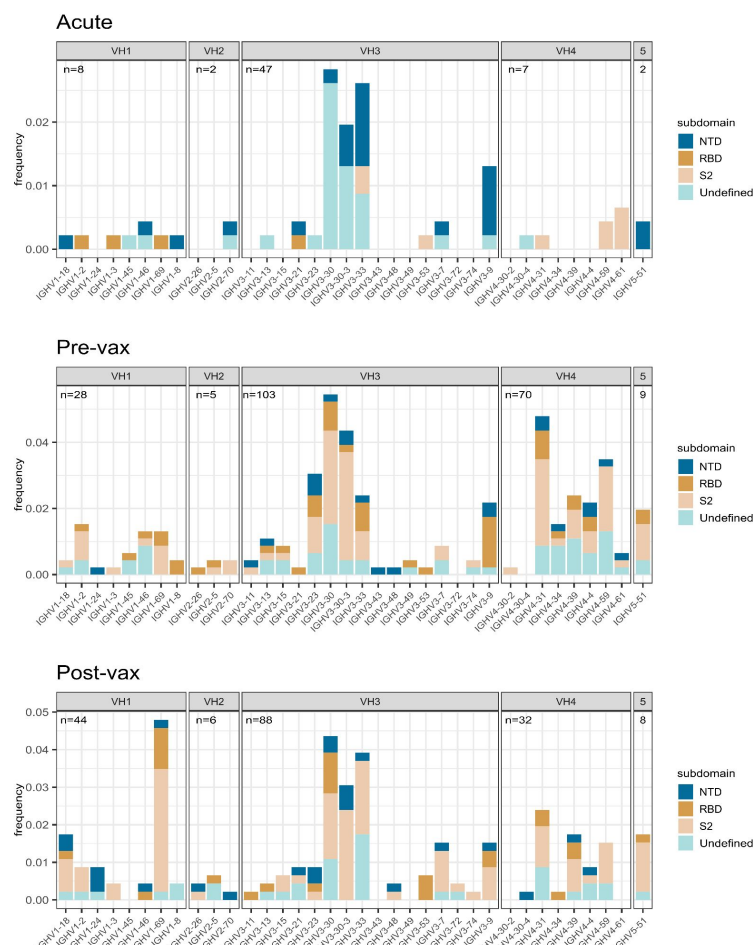

C

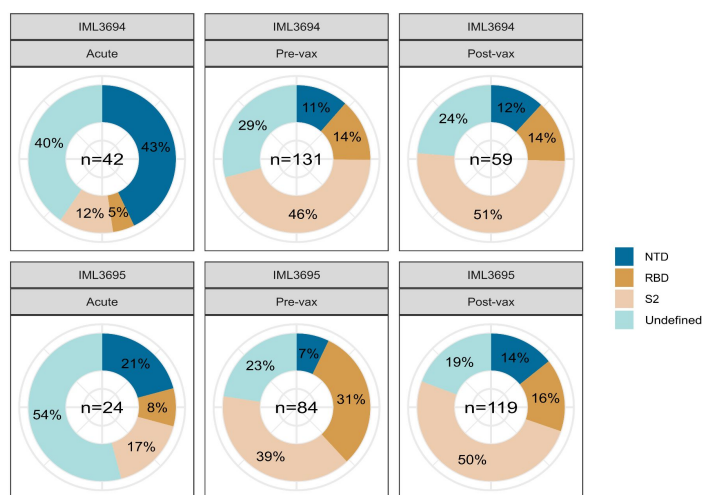

**Supplementary Fig. 3 | (A)** mAb IGHV allele frequencies colored by donor shown separately for the three sets of mAbs isolated at the different time points. **(B)** mAb IGHV allele frequencies colored by subdomain specificity shown separately for the three sets of mAbs isolated at the different time points. **(C)** Pie charts of mAb subdomain frequencies shown separately for the three sets of mAbs isolated at the different time points.



A

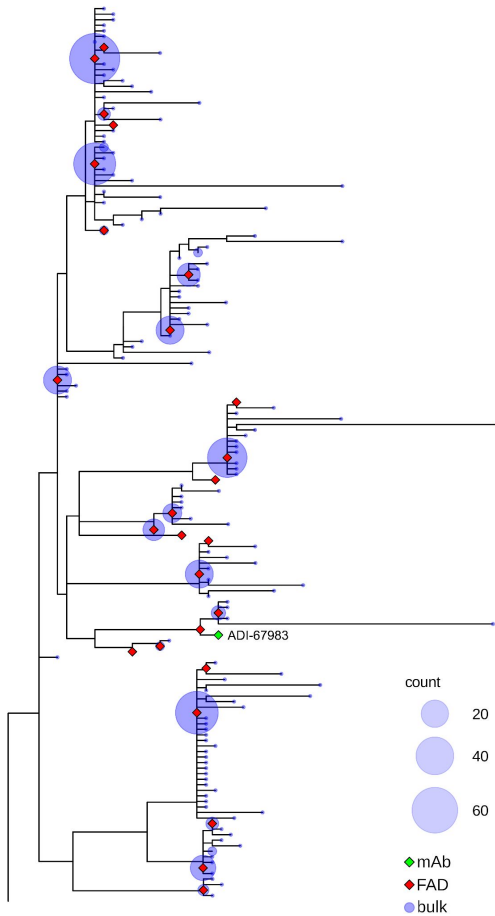

B

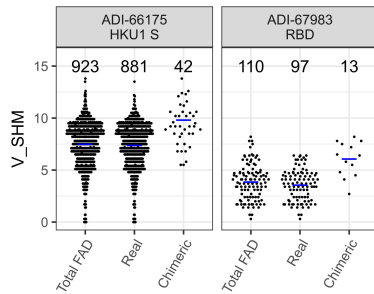

C

| Donor   | Isotype | Timepoint    | Total reads | Merged reads | FAD   | Chimera cleaning | Clonotypes |
|---------|---------|--------------|-------------|--------------|-------|------------------|------------|
| IML3694 | IgG     | Acute        | 4842232     | 4777889      | 14777 | 13004            | 3391       |
| IML3694 | IgG     | Convalescent | 5701290     | 5586476      | 13252 | 12012            | 4444       |
| IML3694 | IgG     | Post-vax     | 8158571     | 8011800      | 18038 | 17204            | 5627       |
| IML3695 | IgG     | Acute        | 4594108     | 4516270      | 10072 | 9016             | 3027       |
| IML3695 | IgG     | Convalescent | 5620379     | 5562365      | 8096  | 7669             | 2035       |
| IML3695 | IgG     | Post-vax     | 6742232     | 6632439      | 17855 | 17133            | 3855       |
| IML3694 | IgM     | Acute        | 1070302     | 954167       | 14501 | 13948            | 12126      |
| IML3694 | IgM     | Acute        | 652551      | 606189       | 23481 | 23460            | 21495      |
| IML3694 | IgM     | Acute        | 1102412     | 969176       | 16930 | 16678            | 14979      |
| IML3695 | IgM     | Acute        | 921646      | 829652       | 13052 | 12905            | 10974      |
| IML3695 | IgM     | Acute        | 989121      | 927195       | 17956 | 17737            | 14959      |
| IML3695 | IgM     | Acute        | 667778      | 600625       | 21124 | 21102            | 17881      |

D

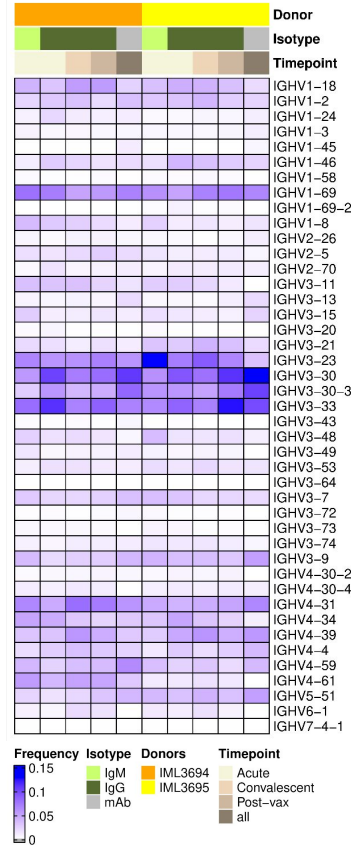

**Supplementary Fig. 4 | (A)** Maximum likelihood phylogenetic tree of IgM NGS, IgG NGS, and mAb sequences belonging to the same lineage as the ADI-67983 mAb. Sequences which remained after Fast Amplicon Denoising are marked in red. The tree is rooted on an inferred germline sequence obtained from the IgBLAST generated “germline\_alignment” column of the sequence with the smallest IGHV SHM in the lineage. **(B)** IGHV SHM nucleotide percentage dot plots for the ADI-66175 and ADI-67983 clones IgG Rep-seq sequences, demonstrating the difference between SHM distributions with and without chimera removal. Blue crossbars are NGS data averages. **(C)** Sequence count data at each processing step. **(D)** Heatmap of clonally collapsed IGHV gene frequencies of bulk libraries and mAbs.
