# Supplementary material for: Vaccination of SARS-CoV-2-infected individuals expands a broad range of clonally diverse affinity-matured B cell lineages
Source: Research Square preprint supplement (doi:10.21203/rs.3.rs-2231608/v1), 2022-11-11
Supplement: Supplementary file 3 [file 8c2792c0ab4af16183c5d3ed.xlsx]

## Sheet: Traced donors
Donor	Timepoint	Date collected	Pre/Post Infection	Days post infection	Pre/Post Vaccination	Days post vaccination
IML3694	Acute	2020-10-06	Post	11	Pre	N/A
IML3694	Convalescent	10/27/2020	Post	32	Pre	N/A
IML3694	Pre-vax	2021-03-04	Post	160	Pre	N/A
IML3694	Post-vax	2021-03-15	Post	171	Post	9
IML3695	Acute	2020-10-06	Post	14	Pre	N/A
IML3695	Convalescent	10/29/2020	Post	37	Pre	N/A
IML3695	Pre-vax	2021-03-10	Post	169	Pre	N/A
IML3695	Post-vax	2021-03-17	Post	176	Post	7
