# Supplementary material for: Vaccination of SARS-CoV-2-infected individuals expands a broad range of clonally diverse affinity-matured B cell lineages
Source: Research Square preprint supplement (doi:10.21203/rs.3.rs-2231608/v1), 2022-11-11
Supplement: Supplementary file 4 [file fb38d3c252eb49171ed45994.xlsx]

## Sheet: Recovered
Sex	Age (years)	Vaccine	Vaccination	Pre-vaccination sample		Post-vaccination sample
			day post disease onset	day post disease onset	day before vaccination	day post disease onset	day after vaccination
Female	27	Moderna	65	65	0	75	10
Male	76	Pfizer	205	190	15	213	8
Female	72	Moderna	140	94	46	148	8
Male	74	Moderna	105	98	7	113	8
Female	29	Moderna	63	40	23	77	14
Female	63	Pfizer	137	95	42	145	8
Male	70	Pfizer	138	97	41	147	9
Female	65	Pfizer	165	105	60	165	0
Male	65	Pfizer	144	102	42	151	7
Male	62	Pfizer	352	213	139	359	7
Male	34	Pfizer	258	196	62	268	10
Male	64	Pfizer	235	188	47	245	10
Male	64	Pfizer	198	191	7	205	7
Male	60	Pfizer	227	187	40	235	8
Female	25	Pfizer	188	100	88	195	7
Female	37	Pfizer	357	181	176	368	11
Male	51	Pfizer	124	99	25	135	11
Male	67	Pfizer	236	187	49	244	8
Female	62	Pfizer	197	185	12	204	7
Male	36	Pfizer	288	189	99	297	9
MEDIAN:	62.5		192.5	143	42	199.5	8
RANGE:	27-76		65-357	40-213	0-176	75-368	7-14
	Comorbidites	Proportion of infected donors (%)
	Diabetes	5
	Hypertension	45
	Coronary heart disease	15
	Chronic lung disorder	25
	Asthma	25
	Automimmune disease	20
	immunsup	10			`
	Kidney disease	0
	Chronic liver disease	0
	Tumor/cancer	0
	Dementia	0
	Other chronic conditions (Allergy, arthrosis, hernia x2, psoriatric athrthritis x2, kidney failure, single kidney after transplantation, hyperlipidemia, pneumocistis pneumonia)	40

## Sheet: Unexposed
Sex	Age (years)	Vaccine	Days after second dose of vaccination
Male	35	Moderna	7
Male	22	Moderna	6
Female	40	Moderna	30
Male	31	Moderna	32
Male	24	Moderna	30
Male	41	Moderna	38
Female	32	Moderna	36
Female	38	Moderna	29
Male	34	Moderna	20
Female	21	Moderna	29
Male	29	Moderna	15
Female	23	Moderna	23
Female	29	Moderna	8
Female	39	Moderna	32
Female	26	Moderna	14
Female	35	Pfizer	18
Male	33	Pfizer	23
Female	68	Pfizer	25
Female	36	Pfizer	16
Male	42	Pfizer	19
Male	54	Moderna	27
MEDIAN:	34		23
RANGE:	21-68		6-38
